# Supplementary material for: Effects of Hypoxemia by Acute High-Altitude Exposure on Human Intestinal Flora and Metabolism
Source: MDPI journal article supplement (doi:10.3390/microorganisms11092284), 2023-09-11
Supplement: s1 [file s1]

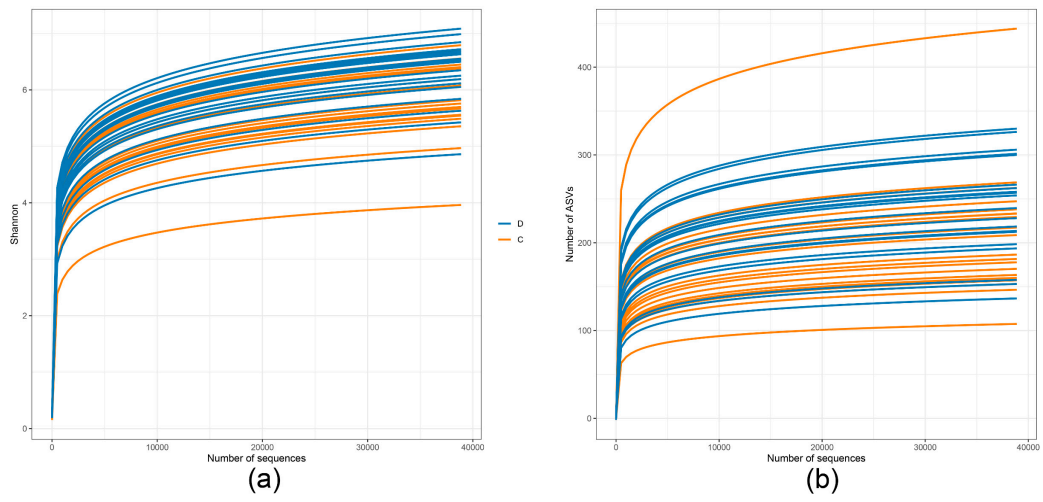

**Figure S1.** AVS analysis. **(a)** Shannon–Wiener curves of the C and D groups; **(b)** Number of AVSs in the C and D groups.
