# Supplementary material for: Effects of Hypoxemia by Acute High-Altitude Exposure on Human Intestinal Flora and Metabolism
Source: Microorganisms. 2023 Sep 11;11(9):2284. doi: 10.3390/microorganisms11092284 (PMC10535934; doi:10.3390/microorganisms11092284)
Supplement: Supplementary file 1 [file microorganisms-11-02284-s001.zip]

Archive with 8 entries (8 files):
- Figure S1.pdf
- SupplementaryTableS1.xlsx
- SupplementaryTableS2.xlsx
- SupplementaryTableS3.xlsx
- SupplementaryTableS4.xlsx
- SupplementaryTableS5.xlsx
- SupplementaryTableS6.xlsx
- SupplementaryTableS7.xlsx
