# Supplementary material for: Effects of Hypoxemia by Acute High-Altitude Exposure on Human Intestinal Flora and Metabolism
Source: Microorganisms. 2023 Sep 11;11(9):2284. doi: 10.3390/microorganisms11092284 (PMC10535934; doi:10.3390/microorganisms11092284)
Supplement: Supplementary file 1 [file microorganisms-11-02284-s001.zip › SupplementaryTableS1.xlsx]

## Sheet: Sheet1
Supplementary Table S1. Baseline Data
Sample	Gender	Age	Height (cm)	Weight (kg)	BMI	Glu	Heart Rate	SAO2（%）-Before	SAO2（%）-After	SBP	DBP	Grain Inta ke(g/d)	Tuber Crop Intake(g/d)	Vegetable Intake(g/d)	Fruit Intake(g/d)	Meat Intake(g/d)	Egg Intake(g/d)	Milk And Dairy Products Intake(ml/d)	Fat Intake(g/d)	Water Intake(ml/d)
1	2	21	161	64	24.6904	4.2	82	97	93	112	82	200-300	＜50	200-400	＞250	50-150	25-30	100-300	＞30	1400-1700
2	1	22	182	59.6	17.993	4.9	95	99	93	126	84	＜100	50-100	200-400	100-250	＜50	＜25	＜100	<20	1400-1700
3	2	22	171	56.6	19.3564	4.7	60	98	92	118	77	100-200	50-100	＞400	＞250	＜50	25-30	100-300	<20	1400-1700
4	1	22	175	69.7	22.7592	5.3	108	97	93	136	85	200-300	＜50	＜200	100-250	＞150	＞30	100-300	20-30	1400-1700
5	1	21	172	61	20.6193	4.7	73	98	92	101	64	100-200	＞100	＜200	100-250	50-150	25-30	100-300	20-30	1400-1700
6	2	21	180	59.2	18.2716	4.7	64	98	94	115	74	100-200	＞100	＞400	＞250	＜50	＜25	＜100	<20	＞1700
7	2	21	166	59	21.4109	4.7	81	99	94	111	66	100-200	50-100	＜200	＞250	50-150	25-30	100-300	20-30	1400-1700
8	2	22	150	54	24	5.3	106	99	89	124	81	200-300	＜50	200-400	＞250	＞150	25-30	＞300	＞30	1400-1700
9	2	23	174	51.8	17.1093	4.6	79	95	91	112	64	＜100	50-100	200-400	100-250	＜50	＜25	＜100	<20	＜1400
10	2	20	158	50.6	20.2692	4.7	128	95	92	100	83	100-200	50-100	＜200	100-250	＞150	25-30	100-300	20-30	1400-1700
11	1	20	157	57.6	23.3681	4.6	126	95	88	119	78	200-300	50-100	＜200	＞250	＞150	＞30	100-300	＞30	1400-1700
12	2	22	177	59.4	18.9601	5.1	68	95	93	139	78	100-200	＞100	200-400	100-250	＜50	＞30	＜100	<20	1400-1700
13	1	20	182	93	28.0763	3.6	83	99	91	138	68	＞300	50-100	＜200	＜100	＞150	＞30	＞300	＞30	＞1700
14	2	21	154	47.6	20.0708	4.3	109	97	93	131	74	100-200	50-100	＜200	＜100	＞150	25-30	100-300	<20	1400-1700
15	2	21	159	47.1	18.6306	5.1	103	98	93	105	63	100-200	50-100	＞400	＞250	＜50	25-30	＜100	<20	1400-1700
16	2	22	164	48	17.8465	5	101	100	94	121	79	＜100	＞100	＞400	100-250	＜50	＜25	＜100	<20	＜1400
17	2	21	160	49.7	19.4141	4.9	97	97	93	120	74	100-200	50-100	＞400	＞250	＜50	＜25	100-300	<20	1400-1700
18	1	32	162	42.5	16.1942	4.6	70	99	90	106	64	＜100	＞100	＜200	＜100	＜50	＜25	＜100	<20	1400-1700
19	2	37	153	51.2	21.8719	4.6	98	98	94	98	115	200-300	50-100	＜200	＜100	50-150	25-30	100-300	20-30	1400-1700
20	2	27	175	78	25.4694	4.9	93	97	94	97	124	＞300	＜50	＜200	＜100	＞150	＞30	＞300	＞30	＞1700
Sample: Sample number Gender: Gender (1 for male, 2 for female) Height (cm): Height (in centimeters) Weight (kg): Weight (in kilograms) BMI: Body mass index Glu: Blood glucose level (in millimoles per liter) Heart Rate: Heart rate (in beats per minute) SAO2（%）-Before: Oxygen saturation level (in percentage) before entering Gannan area SAO2（%）-After: Oxygen saturation level (in percentage) after e…
