# Supplementary material for: Effects of Hypoxemia by Acute High-Altitude Exposure on Human Intestinal Flora and Metabolism
Source: Microorganisms. 2023 Sep 11;11(9):2284. doi: 10.3390/microorganisms11092284 (PMC10535934; doi:10.3390/microorganisms11092284)
Supplement: Supplementary file 1 [file microorganisms-11-02284-s001.zip › SupplementaryTableS2.xlsx]

## Sheet: Table S2-otu
Supplementary Table S2: OTU abundance in groups C and D
OTUId	C1	C2	C3	C4	C5	C6	C7	C8	C9	C10	C11	C12	C13	C14	C15	C16	C17	C18	C19	C20	D1	D2	D3	D4	D5	D6	D7	D8	D9	D10	D11	D12	D13	D14	D15	D16	D17	D18	D19	D20	OTUsize	Taxonomy	superkingdom	phylum	class	order	family	genus	species
ASV1	244	454	3469	799	2554	3488	73	2215	238	359	5296	284	8630	189	1227	1260	656	651	79	400	389	593	4967	1057	236	889	224	2186	513	476	120	572	51	1781	1396	20	159	378	3618	88	52278	Bacteria{superkingdom}(100);Proteobacteria{phylum}(100);Gammaproteobacteria{class}(100);Enterobacteriales{order}(100);Enterobacteriaceae{family}(100);Escherichia/Shigella{genus}(100);Unassigned{species}(0)	Bacteria	Proteobacteria	Gammaproteobacteria	Enterobacteriales	Enterobacteriaceae	Escherichia/Shigella	Unassigned
ASV2	252	461	3435	807	2569	3508	71	2227	239	352	5342	288	8710	189	1236	1238	657	653	89	412	396	572	5001	1019	238	910	226	2197	513	483	116	585	49	1795	1413	24	167	381	3597	86	52503	Bacteria{superkingdom}(96);Firmicutes{phylum}(96);Clostridia{class}(96);Clostridiales{order}(96);Lachnospiraceae{family}(96);Lachnospiracea_incertae_sedis{genus}(96);Unassigned{species}(0)	Bacteria	Firmicutes	Clostridia	Clostridiales	Lachnospiraceae	Lachnospiracea_incertae_sedis	Unassigned
ASV3	2311	1135	934	898	3311	591	3346	3602	2342	1489	974	1023	5210	1176	1842	610	752	1226	363	600	1003	1494	558	1078	4864	699	2548	1562	761	778	550	1177	1607	503	1264	779	1439	595	639	983	58616	Bacteria{superkingdom}(100);Firmicutes{phylum}(100);Clostridia{class}(100);Clostridiales{order}(100);Lachnospiraceae{family}(100);Blautia{genus}(100);Unassigned{species}(0)	Bacteria	Firmicutes	Clostridia	Clostridiales	Lachnospiraceae	Blautia	Unassigned
ASV4	0	524	10025	1465	0	0	0	0	80	1519	0	460	0	1464	1898	3006	487	2142	484	0	1163	44	2453	1019	0	0	0	0	0	437	0	4659	0	335	1223	0	1956	195	0	0	37038	Bacteria{superkingdom}(85);Actinobacteria{phylum}(85);Actinobacteria{class}(85);Bifidobacteriales{order}(85);Bifidobacteriaceae{family}(85);Bifidobacterium{genus}(85);Bifidobacterium_adolescentis{species}(85)	Bacteria	Actinobacteria	Actinobacteria	Bifidobacteriales	Bifidobacteriaceae	Bifidobacterium	Bifidobacterium_adolescentis
ASV5	269	896	838	756	1331	1127	2666	0	688	1180	839	167	272	0	1001	2293	888	513	1016	173	618	835	282	1316	1251	2170	1121	0	411	282	796	227	677	363	0	811	460	588	508	733	30362	Bacteria{superkingdom}(100);Firmicutes{phylum}(100);Clostridia{class}(100);Clostridiales{order}(100);Lachnospiraceae{family}(100);Dorea{genus}(100);Unassigned{species}(0)	Bacteria	Firmicutes	Clostridia	Clostridiales	Lachnospiraceae	Dorea	Unassigned
ASV6	3711	0	466	678	150	145	122	1040	1041	615	19	1221	0	8	2661	463	137	266	126	805	0	247	866	1550	976	400	162	928	2236	701	206	1106	161	423	49	784	1000	247	0	1102	26818	Bacteria{superkingdom}(100);Firmicutes{phylum}(100);Clostridia{class}(100);Clostridiales{order}(100);Ruminococcaceae{family}(100);Faecalibacterium{genus}(100);Unassigned{species}(0)	Bacteria	Firmicutes	Clostridia	Clostridiales	Ruminococcaceae	Faecalibacterium	Unassigned
ASV7	0	302	452	11	1389	76	0	3548	5680	1692	2582	528	499	298	8005	734	0	3197	0	952	433	39	76	20	1083	78	0	1867	446	410	842	468	183	40	189	14	321	24	210	2231	38919	Bacteria{superkingdom}(100);Actinobacteria{phylum}(100);Actinobacteria{class}(100);Bifidobacteriales{order}(100);Bifidobacteriaceae{family}(100);Bifidobacterium{genus}(100);Unassigned{species}(0)	Bacteria	Actinobacteria	Actinobacteria	Bifidobacteriales	Bifidobacteriaceae	Bifidobacterium	Unassigned
ASV8	213	767	388	1828	2403	550	365	57	88	464	570	129	2611	1879	970	123	2736	686	72	0	523	457	267	966	251	529	736	304	2282	581	57	341	158	62	945	229	647	580	1009	14	27837	Bacteria{superkingdom}(100);Firmicutes{phylum}(100);Clostridia{class}(100);Clostridiales{order}(100);Peptostreptococcaceae{family}(100);Romboutsia{genus}(100);Unassigned{species}(0)	Bacteria	Firmicutes	Clostridia	Clostridiales	Peptostreptococcaceae	Romboutsia	Unassigned
ASV9	3	0	584	269	430	350	439	0	2005	398	710	406	0	876	0	145	85	0	144	1395	0	39	210	1981	512	417	386	0	907	1238	606	131	1265	748	4099	75	252	71	156	3410	24742	Bacteria{superkingdom}(100);Actinobacteria{phylum}(100);Actinobacteria{class}(100);Coriobacteriales{order}(100);Coriobacteriaceae{family}(100);Collinsella{genus}(100);Unassigned{species}(0)	Bacteria	Actinobacteria	Actinobacteria	Coriobacteriales	Coriobacteriaceae	Collinsella	Unassigned
ASV10	507	179	0	997	53	346	171	64	471	592	11	412	0	40	131	181	646	127	251	5315	105	352	55	1319	137	1278	260	231	1877	603	1700	380	619	792	172	425	562	722	0	5165	27248	Bacteria{superkingdom}(100);Firmicutes{phylum}(100);Clostridia{class}(100);Clostridiales{order}(100);Ruminococcaceae{family}(100);Faecalibacterium{genus}(100);Unassigned{species}(0)	Bacteria	Firmicutes	Clostridia	Clostridiales	Ruminococcaceae	Faecalibacterium	Unassigned
ASV11	0	0	4	6	19	0	671	0	505	0	0	5200	0	0	0	26	0	3124	0	0	0	7502	14	0	0	0	1951	0	1678	0	0	774	0	0	0	0	0	0	0	0	21474	Bacteria{superkingdom}(99);Firmicutes{phylum}(99);Clostridia{class}(99);Clostridiales{order}(99);Ruminococcaceae{family}(99);Ruminococcus{genus}(99);uncultured_Bacteroidetes_bacterium{species}(99)	Bacteria	Firmicutes	Clostridia	Clostridiales	Ruminococcaceae	Ruminococcus	uncultured_Bacteroidetes_bacterium
ASV12	1823	505	0	0	0	0	0	0	34	671	0	445	0	423	124	0	479	145	370	1159	248	79	0	0	0	30	141	0	2043	990	105	754	75	44	52	2924	0	775	8619	202	23259	Bacteria{superkingdom}(86);Bacteroidetes{phylum}(86);Bacteroidia{class}(86);Bacteroidales{order}(86);Bacteroidaceae{family}(86);Bacteroides{genus}(86);Bacteroides_vulgatus{species}(86)	Bacteria	Bacteroidetes	Bacteroidia	Bacteroidales	Bacteroidaceae	Bacteroides	Bacteroides_vulgatus
ASV13	912	3	175	1821	335	4113	283	1819	2752	398	163	285	0	141	60	150	1079	441	43	1089	0	192	80	1510	897	2411	958	814	2400	645	174	175	1267	475	119	984	505	803	0	1235	31706	Bacteria{superkingdom}(91);Firmicutes{phylum}(91);Clostridia{class}(91);Clostridiales{order}(91);Ruminococcaceae{family}(91);Gemmiger{genus}(91);Unassigned{species}(0)	Bacteria	Firmicutes	Clostridia	Clostridiales	Ruminococcaceae	Gemmiger	Unassigned
ASV14	0	0	0	0	0	0	344	1121	0	1077	554	389	0	0	3	0	0	0	73	570	0	0	0	0	8	0	154	883	0	219	787	265	956	729	0	485	305	0	1193	1551	11666	Bacteria{superkingdom}(96);Firmicutes{phylum}(96);Clostridia{class}(96);Clostridiales{order}(96);Ruminococcaceae{family}(96);Ruminococcus{genus}(96);Ruminococcus_bromii{species}(96)	Bacteria	Firmicutes	Clostridia	Clostridiales	Ruminococcaceae	Ruminococcus	Ruminococcus_bromii
ASV15	1099	1653	1262	901	2	0	975	216	703	289	500	629	0	0	0	4218	222	724	35	31	1160	724	1419	1270	0	0	479	815	361	222	148	111	499	288	0	90	814	265	0	135	22259	Bacteria{superkingdom}(100);Firmicutes{phylum}(100);Clostridia{class}(100);Clostridiales{order}(100);Lachnospiraceae{family}(100);Ruminococcus2{genus}(100);Unassigned{species}(0)	Bacteria	Firmicutes	Clostridia	Clostridiales	Lachnospiraceae	Ruminococcus2	Unassigned
ASV16	2632	273	0	143	173	47	0	152	0	125	9	32	0	17	148	55	1104	242	163	4418	141	99	0	153	88	26	77	4524	300	183	788	35	51	96	7	2168	767	1396	1509	618	22759	Bacteria{superkingdom}(93);Bacteroidetes{phylum}(93);Bacteroidia{class}(93);Bacteroidales{order}(93);Bacteroidaceae{family}(93);Bacteroides{genus}(93);Bacteroides_vulgatus{species}(93)	Bacteria	Bacteroidetes	Bacteroidia	Bacteroidales	Bacteroidaceae	Bacteroides	Bacteroides_vulgatus
ASV17	307	218	369	230	3367	802	879	1739	184	454	782	382	0	122	812	169	250	277	407	101	145	131	121	404	5506	786	691	624	236	340	438	628	414	285	123	287	651	185	0	196	24042	Bacteria{superkingdom}(100);Firmicutes{phylum}(100);Clostridia{class}(100);Clostridiales{order}(100);Lachnospiraceae{family}(100);Blautia{genus}(100);Unassigned{species}(0)	Bacteria	Firmicutes	Clostridia	Clostridiales	Lachnospiraceae	Blautia	Unassigned
ASV18	1134	92	65	434	491	340	360	355	631	484	1935	910	116	751	236	292	164	1014	0	228	96	210	61	1272	396	680	253	313	1032	228	1965	608	2653	414	1014	1115	255	219	10	592	23418	Bacteria{superkingdom}(100);Firmicutes{phylum}(100);Clostridia{class}(100);Clostridiales{order}(100);Lachnospiraceae{family}(100);Blautia{genus}(100);Unassigned{species}(0)	Bacteria	Firmicutes	Clostridia	Clostridiales	Lachnospiraceae	Blautia	Unassigned
ASV19	0	605	0	0	4	43	359	0	0	864	4	998	3	395	0	0	1901	622	6	0	539	102	0	0	4	66	1404	0	0	2738	1176	852	357	0	168	68	1273	2624	0	0	17175	Bacteria{superkingdom}(100);Bacteroidetes{phylum}(100);Bacteroidia{class}(100);Bacteroidales{order}(100);Rikenellaceae{family}(100);Alistipes{genus}(100);Unassigned{species}(0)	Bacteria	Bacteroidetes	Bacteroidia	Bacteroidales	Rikenellaceae	Alistipes	Unassigned
ASV20	3	0	179	348	6	168	111	0	52	0	0	3279	0	0	0	326	0	0	293	0	0	5	13	209	11	242	308	0	385	0	0	4291	0	0	0	2586	4022	0	0	0	16837	Bacteria{superkingdom}(83);Bacteroidetes{phylum}(83);Bacteroidia{class}(83);Bacteroidales{order}(83);Bacteroidaceae{family}(83);Bacteroides{genus}(83);Bacteroides_plebeius{species}(83)	Bacteria	Bacteroidetes	Bacteroidia	Bacteroidales	Bacteroidaceae	Bacteroides	Bacteroides_plebeius
ASV21	305	191	1208	306	759	359	741	791	1534	825	240	289	64	447	596	436	350	1264	224	220	243	60	450	1207	1285	494	449	375	461	383	169	303	254	224	827	307	851	237	0	771	20499	Bacteria{superkingdom}(86);Firmicutes{phylum}(86);Clostridia{class}(86);Clostridiales{order}(86);Lachnospiraceae{family}(86);Lachnospiracea_incertae_sedis{genus}(86);uncultured_Eubacteriaceae_bacterium{species}(86)	Bacteria	Firmicutes	Clostridia	Clostridiales	Lachnospiraceae	Lachnospiracea_incertae_sedis	uncultured_Eubacteriaceae_bacterium
ASV22	917	534	289	459	2679	75	762	1429	296	1138	458	1218	194	1118	121	424	297	1145	228	806	320	265	156	903	712	126	226	576	86	397	355	1653	85	620	601	678	619	401	166	1130	24662	Bacteria{superkingdom}(100);Firmicutes{phylum}(100);Clostridia{class}(100);Clostridiales{order}(100);Lachnospiraceae{family}(100);Fusicatenibacter{genus}(100);Unassigned{species}(0)	Bacteria	Firmicutes	Clostridia	Clostridiales	Lachnospiraceae	Fusicatenibacter	Unassigned
ASV23	743	3470	71	367	170	110	16	0	61	482	37	478	245	976	0	0	122	201	116	333	3652	587	200	273	1495	451	88	0	153	451	717	128	28	438	917	468	150	291	59	106	18650	Bacteria{superkingdom}(100);Firmicutes{phylum}(100);Clostridia{class}(100);Clostridiales{order}(100);Ruminococcaceae{family}(100);Faecalibacterium{genus}(100);Unassigned{species}(0)	Bacteria	Firmicutes	Clostridia	Clostridiales	Ruminococcaceae	Faecalibacterium	Unassigned
ASV24	3253	156	193	448	1359	431	933	2531	377	986	338	167	0	0	1820	1724	237	296	18	334	213	57	716	819	1630	666	183	750	971	923	504	109	478	555	0	121	428	320	0	450	25494	Bacteria{superkingdom}(98);Firmicutes{phylum}(98);Erysipelotrichia{class}(98);Erysipelotrichales{order}(98);Erysipelotrichaceae{family}(98);Clostridium_XVIII{genus}(98);Unassigned{species}(0)	Bacteria	Firmicutes	Erysipelotrichia	Erysipelotrichales	Erysipelotrichaceae	Clostridium_XVIII	Unassigned
ASV25	3713	400	0	338	184	151	143	0	0	102	0	529	12	435	11	1560	97	444	0	895	304	910	999	758	325	247	99	270	0	105	182	235	0	302	810	81	103	970	1740	403	17857	Bacteria{superkingdom}(100);Firmicutes{phylum}(100);Clostridia{class}(100);Clostridiales{order}(100);Lachnospiraceae{family}(100);Roseburia{genus}(100);Unassigned{species}(0)	Bacteria	Firmicutes	Clostridia	Clostridiales	Lachnospiraceae	Roseburia	Unassigned
ASV26	161	0	41	153	75	51	2988	0	556	804	4922	385	0	359	26	88	1272	243	52	196	0	20	30	34	11	68	1770	0	229	235	400	371	65	66	482	59	474	248	0	500	17434	Bacteria{superkingdom}(100);Firmicutes{phylum}(100);Clostridia{class}(100);Clostridiales{order}(100);Ruminococcaceae{family}(100);Unassigned{genus}(0);Unassigned{species}(0)	Bacteria	Firmicutes	Clostridia	Clostridiales	Ruminococcaceae	Unassigned	Unassigned
ASV27	272	413	862	83	286	216	0	999	3101	513	257	243	224	1437	1358	411	133	1089	0	303	580	33	148	252	242	160	0	757	235	340	265	518	286	118	670	0	208	146	95	1335	18588	Bacteria{superkingdom}(85);Actinobacteria{phylum}(85);Actinobacteria{class}(85);Bifidobacteriales{order}(85);Bifidobacteriaceae{family}(85);Bifidobacterium{genus}(85);Bifidobacterium_longum{species}(85)	Bacteria	Actinobacteria	Actinobacteria	Bifidobacteriales	Bifidobacteriaceae	Bifidobacterium	Bifidobacterium_longum
ASV28	171	0	181	615	71	580	175	174	555	542	78	101	0	2003	122	272	530	284	205	115	0	177	120	455	257	663	205	475	471	536	596	971	124	372	4488	401	429	617	0	201	18332	Bacteria{superkingdom}(100);Firmicutes{phylum}(100);Clostridia{class}(100);Clostridiales{order}(100);Ruminococcaceae{family}(100);Faecalibacterium{genus}(100);Unassigned{species}(0)	Bacteria	Firmicutes	Clostridia	Clostridiales	Ruminococcaceae	Faecalibacterium	Unassigned
ASV29	0	1550	0	65	110	40	0	0	0	1332	83	0	0	156	0	67	0	387	50	0	67	82	0	71	75	74	0	0	53	676	2014	0	64	129	698	0	92	0	0	0	7935	Bacteria{superkingdom}(100);Firmicutes{phylum}(100);Clostridia{class}(100);Clostridiales{order}(100);Lachnospiraceae{family}(100);Roseburia{genus}(100);Unassigned{species}(0)	Bacteria	Firmicutes	Clostridia	Clostridiales	Lachnospiraceae	Roseburia	Unassigned
ASV30	0	0	0	0	78	168	33	0	0	907	8	238	0	1239	0	0	0	1134	916	1886	0	111	0	31	48	455	751	759	2938	3196	1922	51	440	728	96	401	1166	30	76	258	20064	Bacteria{superkingdom}(91);Bacteroidetes{phylum}(91);Bacteroidia{class}(91);Bacteroidales{order}(91);Bacteroidaceae{family}(91);Bacteroides{genus}(91);Bacteroides_uniformis{species}(91)	Bacteria	Bacteroidetes	Bacteroidia	Bacteroidales	Bacteroidaceae	Bacteroides	Bacteroides_uniformis
ASV31	95	884	0	340	174	95	29	29	2669	438	487	0	488	164	10	165	91	159	9	30	2937	200	27	248	104	104	24	6	241	83	295	0	412	166	106	26	154	76	10	30	11605	Bacteria{superkingdom}(100);Firmicutes{phylum}(100);Bacilli{class}(100);Lactobacillales{order}(100);Streptococcaceae{family}(100);Streptococcus{genus}(100);Unassigned{species}(0)	Bacteria	Firmicutes	Bacilli	Lactobacillales	Streptococcaceae	Streptococcus	Unassigned
ASV32	0	0	0	9	0	0	0	0	0	0	0	0	0	0	0	5	0	0	0	0	0	826	0	0	1	0	0	0	0	0	0	0	0	0	0	539	0	0	0	0	1380	Bacteria{superkingdom}(100);Firmicutes{phylum}(100);Erysipelotrichia{class}(100);Erysipelotrichales{order}(100);Erysipelotrichaceae{family}(100);Catenibacterium{genus}(100);Unassigned{species}(0)	Bacteria	Firmicutes	Erysipelotrichia	Erysipelotrichales	Erysipelotrichaceae	Catenibacterium	Unassigned
ASV33	0	0	0	340	0	224	114	0	0	0	0	0	0	0	0	0	0	0	60	0	0	0	0	41	0	65	32	0	0	0	0	0	24	0	0	449	0	0	0	0	1349	Bacteria{superkingdom}(100);Bacteroidetes{phylum}(100);Bacteroidia{class}(100);Bacteroidales{order}(100);Prevotellaceae{family}(100);Prevotella{genus}(100);Unassigned{species}(0)	Bacteria	Bacteroidetes	Bacteroidia	Bacteroidales	Prevotellaceae	Prevotella	Unassigned
ASV34	653	113	10	474	690	1994	3467	877	156	286	160	134	41	256	451	144	95	160	123	516	126	241	59	753	680	349	781	800	654	216	776	103	85	253	210	215	681	248	648	1548	20226	Bacteria{superkingdom}(99);Firmicutes{phylum}(99);Clostridia{class}(99);Clostridiales{order}(99);Ruminococcaceae{family}(99);{genus}(99);Unassigned{species}(0)	Bacteria	Firmicutes	Clostridia	Clostridiales	Ruminococcaceae		Unassigned
ASV35	0	137	596	582	294	241	297	0	219	327	354	50	0	0	317	960	87	515	1129	547	254	408	260	1158	394	262	522	0	179	120	673	117	118	336	0	329	407	112	0	1089	13390	Bacteria{superkingdom}(100);Firmicutes{phylum}(100);Clostridia{class}(100);Clostridiales{order}(100);Lachnospiraceae{family}(100);Coprococcus{genus}(100);Unassigned{species}(0)	Bacteria	Firmicutes	Clostridia	Clostridiales	Lachnospiraceae	Coprococcus	Unassigned
ASV36	0	0	2902	38	0	0	0	0	0	0	0	0	0	0	64	0	0	0	0	0	0	0	424	88	0	0	0	0	0	0	0	0	0	0	0	0	0	0	0	0	3516	Bacteria{superkingdom}(93);Firmicutes{phylum}(93);Bacilli{class}(93);Lactobacillales{order}(93);Lactobacillaceae{family}(93);Lactobacillus{genus}(93);Lactobacillus_ruminis{species}(93)	Bacteria	Firmicutes	Bacilli	Lactobacillales	Lactobacillaceae	Lactobacillus	Lactobacillus_ruminis
ASV37	0	0	0	10	4136	0	0	0	0	0	0	0	0	0	0	20	0	0	362	0	0	2322	0	0	4828	0	0	0	0	0	0	0	0	0	0	1260	0	0	0	0	12938	Bacteria{superkingdom}(100);Firmicutes{phylum}(100);Erysipelotrichia{class}(100);Erysipelotrichales{order}(100);Erysipelotrichaceae{family}(100);Holdemanella{genus}(100);Unassigned{species}(0)	Bacteria	Firmicutes	Erysipelotrichia	Erysipelotrichales	Erysipelotrichaceae	Holdemanella	Unassigned
ASV38	8	182	38	0	20	1336	0	11	0	184	0	0	707	125	1137	0	0	593	0	0	206	0	92	15	13	1633	0	124	6	53	0	8	0	23	141	0	0	0	1088	0	7743	Bacteria{superkingdom}(100);Firmicutes{phylum}(100);Clostridia{class}(100);Clostridiales{order}(100);Lachnospiraceae{family}(100);Lachnospiracea_incertae_sedis{genus}(100);Unassigned{species}(0)	Bacteria	Firmicutes	Clostridia	Clostridiales	Lachnospiraceae	Lachnospiracea_incertae_sedis	Unassigned
ASV39	0	0	0	0	0	521	0	0	0	0	485	0	0	0	0	0	0	0	0	0	0	2	0	0	0	178	4	0	0	0	881	0	685	0	0	67	0	1	75	0	2899	Bacteria{superkingdom}(100);Verrucomicrobia{phylum}(100);Verrucomicrobiae{class}(100);Verrucomicrobiales{order}(100);Verrucomicrobiaceae{family}(100);Akkermansia{genus}(100);Unassigned{species}(0)	Bacteria	Verrucomicrobia	Verrucomicrobiae	Verrucomicrobiales	Verrucomicrobiaceae	Akkermansia	Unassigned
ASV40	11	86	0	96	6	363	27	0	2	0	1	638	2	1071	0	30	248	130	96	185	163	281	6	88	0	399	343	0	228	3	580	523	262	171	158	483	674	508	95	98	8055	Bacteria{superkingdom}(88);Bacteroidetes{phylum}(88);Bacteroidia{class}(88);Bacteroidales{order}(88);Porphyromonadaceae{family}(88);Parabacteroides{genus}(88);Parabacteroides_merdae{species}(88)	Bacteria	Bacteroidetes	Bacteroidia	Bacteroidales	Porphyromonadaceae	Parabacteroides	Parabacteroides_merdae
ASV41	0	0	800	1466	0	613	0	0	2	1905	0	0	0	313	0	26	551	0	0	0	0	8	625	129	0	1394	0	0	0	694	0	0	0	1997	973	0	1041	1242	353	0	14132	Bacteria{superkingdom}(100);Firmicutes{phylum}(100);Negativicutes{class}(100);Selenomonadales{order}(100);Veillonellaceae{family}(100);Dialister{genus}(100);Unassigned{species}(0)	Bacteria	Firmicutes	Negativicutes	Selenomonadales	Veillonellaceae	Dialister	Unassigned
ASV42	0	0	869	153	75	426	0	185	0	116	571	0	3165	48	33	376	126	0	0	0	0	94	863	49	0	1343	0	205	29	85	23	0	0	135	0	0	41	0	605	0	9615	Bacteria{superkingdom}(100);Proteobacteria{phylum}(100);Gammaproteobacteria{class}(100);Enterobacteriales{order}(100);Enterobacteriaceae{family}(100);Escherichia/Shigella{genus}(100);Unassigned{species}(0)	Bacteria	Proteobacteria	Gammaproteobacteria	Enterobacteriales	Enterobacteriaceae	Escherichia/Shigella	Unassigned
ASV43	0	0	0	371	0	590	0	0	0	5	0	0	0	0	0	0	493	0	0	0	3	0	0	1104	0	994	0	0	0	12	0	0	45	2	0	0	0	2050	0	0	5669	Bacteria{superkingdom}(100);Bacteroidetes{phylum}(100);Bacteroidia{class}(100);Bacteroidales{order}(100);Bacteroidaceae{family}(100);Bacteroides{genus}(100);Bacteroides_coprocola{species}(100)	Bacteria	Bacteroidetes	Bacteroidia	Bacteroidales	Bacteroidaceae	Bacteroides	Bacteroides_coprocola
ASV44	0	0	0	473	0	0	2358	0	2	0	0	3	0	0	0	0	0	0	432	0	0	1	0	409	0	1	829	0	53	0	26	0	0	1834	0	0	0	0	0	0	6421	Bacteria{superkingdom}(100);Firmicutes{phylum}(100);Clostridia{class}(100);Clostridiales{order}(100);Ruminococcaceae{family}(100);Clostridium_IV{genus}(100);uncultured_Bacteroidetes_bacterium{species}(100)	Bacteria	Firmicutes	Clostridia	Clostridiales	Ruminococcaceae	Clostridium_IV	uncultured_Bacteroidetes_bacterium
ASV45	304	396	48	150	327	308	115	339	460	68	351	483	41	249	159	155	518	723	170	50	426	566	21	380	196	605	75	155	323	73	373	367	156	212	314	346	132	348	41	84	10607	Bacteria{superkingdom}(100);Firmicutes{phylum}(100);Clostridia{class}(100);Clostridiales{order}(100);Lachnospiraceae{family}(100);Blautia{genus}(100);Unassigned{species}(0)	Bacteria	Firmicutes	Clostridia	Clostridiales	Lachnospiraceae	Blautia	Unassigned
ASV46	0	0	0	0	0	0	204	0	9	0	0	286	0	0	0	0	3816	0	0	0	5	0	0	0	0	0	98	0	40	0	0	264	0	369	0	0	0	1330	0	0	6421	Bacteria{superkingdom}(96);Firmicutes{phylum}(96);Clostridia{class}(96);Clostridiales{order}(96);Ruminococcaceae{family}(96);Ruminococcus{genus}(96);Ruminococcus_bromii{species}(96)	Bacteria	Firmicutes	Clostridia	Clostridiales	Ruminococcaceae	Ruminococcus	Ruminococcus_bromii
ASV47	0	1038	0	0	0	0	0	0	0	0	0	0	0	0	0	0	36	0	0	0	0	0	0	0	0	7	0	0	0	0	76	0	0	0	0	0	0	260	0	0	1417	Bacteria{superkingdom}(100);Firmicutes{phylum}(100);Negativicutes{class}(100);Selenomonadales{order}(100);Veillonellaceae{family}(100);Megamonas{genus}(100);Unassigned{species}(0)	Bacteria	Firmicutes	Negativicutes	Selenomonadales	Veillonellaceae	Megamonas	Unassigned
ASV48	2	1247	0	2289	0	0	0	0	0	0	6	0	0	0	168	0	0	80	0	0	17	9	0	21	0	0	0	0	0	0	37	0	32	0	0	0	0	28	0	0	3936	Bacteria{superkingdom}(100);Firmicutes{phylum}(100);Negativicutes{class}(100);Selenomonadales{order}(100);Veillonellaceae{family}(100);Megamonas{genus}(100);Unassigned{species}(0)	Bacteria	Firmicutes	Negativicutes	Selenomonadales	Veillonellaceae	Megamonas	Unassigned
ASV49	52	182	185	50	77	58	469	174	289	359	294	124	817	115	602	273	30	263	71	185	309	19	95	211	154	65	465	380	138	37	146	144	102	99	88	82	251	41	153	153	7801	Bacteria{superkingdom}(100);Firmicutes{phylum}(100);Clostridia{class}(100);Clostridiales{order}(100);Lachnospiraceae{family}(100);Anaerostipes{genus}(100);Unassigned{species}(0)	Bacteria	Firmicutes	Clostridia	Clostridiales	Lachnospiraceae	Anaerostipes	Unassigned
ASV50	0	0	0	182	0	160	5	0	0	0	0	0	0	0	0	0	194	0	6	0	0	0	0	0	10	52	41	0	0	0	0	0	0	0	0	103	0	237	0	0	990	Bacteria{superkingdom}(100);Bacteroidetes{phylum}(100);Bacteroidia{class}(100);Bacteroidales{order}(100);Prevotellaceae{family}(100);Prevotella{genus}(100);Unassigned{species}(0)	Bacteria	Bacteroidetes	Bacteroidia	Bacteroidales	Prevotellaceae	Prevotella	Unassigned
ASV51	0	201	0	0	34	19	0	0	0	0	0	89	0	0	632	0	168	0	123	486	159	0	0	0	14	7	0	0	0	0	0	150	0	145	0	0	0	335	1776	71	4409	Bacteria{superkingdom}(86);Bacteroidetes{phylum}(86);Bacteroidia{class}(86);Bacteroidales{order}(86);Bacteroidaceae{family}(86);Bacteroides{genus}(86);Bacteroides_vulgatus{species}(86)	Bacteria	Bacteroidetes	Bacteroidia	Bacteroidales	Bacteroidaceae	Bacteroides	Bacteroides_vulgatus
ASV52	0	0	0	0	0	0	0	0	0	0	0	0	0	0	0	0	150	0	0	0	0	0	0	0	0	8	0	0	0	0	0	0	1505	0	0	0	0	207	0	0	1870	Bacteria{superkingdom}(100);Firmicutes{phylum}(100);Erysipelotrichia{class}(100);Erysipelotrichales{order}(100);Erysipelotrichaceae{family}(100);Holdemanella{genus}(100);Unassigned{species}(0)	Bacteria	Firmicutes	Erysipelotrichia	Erysipelotrichales	Erysipelotrichaceae	Holdemanella	Unassigned
ASV53	155	0	0	552	54	0	99	66	1023	30	0	20	32	7	0	2453	113	75	19	217	0	776	1550	30	3	27	0	15	112	25	29	0	3	0	655	0	15	8	155	30	8348	Bacteria{superkingdom}(100);Proteobacteria{phylum}(100);Gammaproteobacteria{class}(100);Pasteurellales{order}(100);Pasteurellaceae{family}(100);Haemophilus{genus}(100);Unassigned{species}(0)	Bacteria	Proteobacteria	Gammaproteobacteria	Pasteurellales	Pasteurellaceae	Haemophilus	Unassigned
ASV54	0	0	0	0	0	0	6	0	0	0	38	0	0	0	163	0	0	0	0	0	0	0	0	0	0	0	10	0	0	0	1686	0	0	0	0	0	0	0	0	0	1903	Bacteria{superkingdom}(99);Firmicutes{phylum}(99);Negativicutes{class}(99);Selenomonadales{order}(99);Veillonellaceae{family}(99);Dialister{genus}(99);Unassigned{species}(0)	Bacteria	Firmicutes	Negativicutes	Selenomonadales	Veillonellaceae	Dialister	Unassigned
ASV55	0	0	0	2618	0	0	13	0	0	0	6	0	0	0	0	0	9	0	0	0	0	7	0	14	0	0	7	0	0	4	78	0	11	0	2	0	0	112	0	0	2881	Bacteria{superkingdom}(88);Firmicutes{phylum}(88);Negativicutes{class}(88);Selenomonadales{order}(88);Veillonellaceae{family}(88);Megamonas{genus}(88);uncultured_bacterium{species}(88)	Bacteria	Firmicutes	Negativicutes	Selenomonadales	Veillonellaceae	Megamonas	uncultured_bacterium
ASV56	0	0	0	0	0	0	428	0	0	0	0	0	0	0	0	0	0	0	0	0	0	81	0	0	0	0	58	0	0	0	0	0	35	0	0	0	0	0	0	0	602	Bacteria{superkingdom}(100);Bacteroidetes{phylum}(100);Bacteroidia{class}(100);Bacteroidales{order}(100);Prevotellaceae{family}(100);Prevotella{genus}(100);Unassigned{species}(0)	Bacteria	Bacteroidetes	Bacteroidia	Bacteroidales	Prevotellaceae	Prevotella	Unassigned
ASV57	0	179	0	24	0	0	0	0	0	0	0	0	0	282	0	0	0	276	0	0	217	0	8	22	0	0	0	59	0	0	0	0	332	930	36	0	0	0	18	0	2383	Bacteria{superkingdom}(85);Bacteroidetes{phylum}(85);Bacteroidia{class}(85);Bacteroidales{order}(85);Bacteroidaceae{family}(85);Bacteroides{genus}(85);Bacteroides_uniformis{species}(85)	Bacteria	Bacteroidetes	Bacteroidia	Bacteroidales	Bacteroidaceae	Bacteroides	Bacteroides_uniformis
ASV58	0	0	0	7	0	9	0	4	0	0	0	236	0	0	0	0	60	0	14	1345	0	18	0	12	39	21	21	495	0	0	292	151	2392	99	0	689	490	135	0	510	7039	Bacteria{superkingdom}(100);Bacteroidetes{phylum}(100);Bacteroidia{class}(100);Bacteroidales{order}(100);Rikenellaceae{family}(100);Alistipes{genus}(100);Unassigned{species}(0)	Bacteria	Bacteroidetes	Bacteroidia	Bacteroidales	Rikenellaceae	Alistipes	Unassigned
ASV59	4	0	0	0	0	0	0	0	0	0	0	2	0	0	0	0	0	0	0	0	0	0	0	0	0	0	0	0	0	0	145	0	0	0	0	0	0	0	0	0	151	Bacteria{superkingdom}(86);Firmicutes{phylum}(86);Negativicutes{class}(86);Selenomonadales{order}(86);Veillonellaceae{family}(86);Megamonas{genus}(86);uncultured_bacterium{species}(86)	Bacteria	Firmicutes	Negativicutes	Selenomonadales	Veillonellaceae	Megamonas	uncultured_bacterium
ASV60	0	1315	0	53	0	0	0	19	11	0	0	0	0	327	0	1	0	39	311	17	985	0	0	86	16	2	0	33	20	0	0	0	0	46	284	1610	4	60	0	3	5242	Bacteria{superkingdom}(100);Firmicutes{phylum}(100);Negativicutes{class}(100);Selenomonadales{order}(100);Acidaminococcaceae{family}(100);Phascolarctobacterium{genus}(100);Unassigned{species}(0)	Bacteria	Firmicutes	Negativicutes	Selenomonadales	Acidaminococcaceae	Phascolarctobacterium	Unassigned
ASV61	346	60	12	45	59	65	0	576	374	294	360	53	183	0	116	140	53	433	0	68	119	139	0	195	230	91	0	435	95	126	238	15	524	71	8	0	219	27	0	206	5975	Bacteria{superkingdom}(98);Firmicutes{phylum}(98);Clostridia{class}(98);Clostridiales{order}(98);Lachnospiraceae{family}(98);Lachnospiracea_incertae_sedis{genus}(98);uncultured_Eubacteriaceae_bacterium{species}(98)	Bacteria	Firmicutes	Clostridia	Clostridiales	Lachnospiraceae	Lachnospiracea_incertae_sedis	uncultured_Eubacteriaceae_bacterium
ASV62	0	0	357	77	233	0	0	0	0	46	302	153	66	31	95	12	0	0	0	0	0	24	1099	57	0	26	0	32	247	372	0	167	24	168	97	0	39	0	258	0	3982	Bacteria{superkingdom}(99);Firmicutes{phylum}(99);Clostridia{class}(99);Clostridiales{order}(99);Clostridiaceae_1{family}(99);Clostridium_sensu_stricto{genus}(99);Unassigned{species}(0)	Bacteria	Firmicutes	Clostridia	Clostridiales	Clostridiaceae_1	Clostridium_sensu_stricto	Unassigned
ASV63	0	0	0	72	0	63	88	0	0	352	0	645	0	0	0	2	180	239	396	0	0	148	0	168	0	134	487	0	0	500	290	713	53	110	0	716	270	915	0	10	6551	Bacteria{superkingdom}(100);Firmicutes{phylum}(100);Clostridia{class}(100);Clostridiales{order}(100);Ruminococcaceae{family}(100);Unassigned{genus}(0);Unassigned{species}(0)	Bacteria	Firmicutes	Clostridia	Clostridiales	Ruminococcaceae	Unassigned	Unassigned
ASV64	209	169	139	231	264	63	284	270	139	130	97	80	112	116	313	187	158	177	132	15	122	87	122	587	186	147	205	174	109	67	56	41	101	84	171	124	64	63	0	72	5867	Bacteria{superkingdom}(100);Firmicutes{phylum}(100);Clostridia{class}(100);Clostridiales{order}(100);Lachnospiraceae{family}(100);Dorea{genus}(100);Unassigned{species}(0)	Bacteria	Firmicutes	Clostridia	Clostridiales	Lachnospiraceae	Dorea	Unassigned
ASV66	0	0	24	77	0	0	17	0	0	0	0	0	18	0	0	0	0	0	0	0	0	554	95	88	0	0	178	0	343	0	0	0	283	0	0	0	0	0	0	0	1677	Bacteria{superkingdom}(93);Bacteroidetes{phylum}(93);Bacteroidia{class}(93);Bacteroidales{order}(93);Bacteroidaceae{family}(93);Bacteroides{genus}(93);Bacteroides_dorei{species}(93)	Bacteria	Bacteroidetes	Bacteroidia	Bacteroidales	Bacteroidaceae	Bacteroides	Bacteroides_dorei
ASV67	222	0	10	0	0	0	11	0	0	104	0	0	0	629	154	153	0	437	0	230	96	244	23	0	0	0	20	177	0	178	0	0	53	0	219	0	84	661	779	167	4651	Bacteria{superkingdom}(100);Firmicutes{phylum}(100);Clostridia{class}(100);Clostridiales{order}(100);Lachnospiraceae{family}(100);Roseburia{genus}(100);Unassigned{species}(0)	Bacteria	Firmicutes	Clostridia	Clostridiales	Lachnospiraceae	Roseburia	Unassigned
ASV68	0	0	0	0	0	478	0	0	995	0	0	0	2624	748	0	0	0	0	0	0	0	0	373	0	0	0	0	0	0	0	0	0	0	0	1625	137	0	0	0	0	6980	Bacteria{superkingdom}(82);Firmicutes{phylum}(82);Bacilli{class}(82);Lactobacillales{order}(82);Streptococcaceae{family}(82);Streptococcus{genus}(82);Streptococcus_salivarius{species}(82)	Bacteria	Firmicutes	Bacilli	Lactobacillales	Streptococcaceae	Streptococcus	Streptococcus_salivarius
ASV69	0	0	0	218	0	2	5	0	0	0	63	234	0	685	0	0	0	532	10	480	0	0	0	285	0	3	6	0	0	0	210	171	656	0	202	0	8	0	0	902	4672	Bacteria{superkingdom}(85);Firmicutes{phylum}(85);Clostridia{class}(85);Clostridiales{order}(85);Eubacteriaceae{family}(85);Eubacterium{genus}(85);uncultured_Clostridiales_bacterium{species}(85)	Bacteria	Firmicutes	Clostridia	Clostridiales	Eubacteriaceae	Eubacterium	uncultured_Clostridiales_bacterium
ASV70	0	0	4	97	11	0	0	0	0	234	0	50	0	149	0	0	415	367	1512	0	0	369	0	251	48	0	129	0	0	592	0	23	74	95	21	0	159	903	0	0	5503	Bacteria{superkingdom}(91);Bacteroidetes{phylum}(91);Bacteroidia{class}(91);Bacteroidales{order}(91);Bacteroidaceae{family}(91);Bacteroides{genus}(91);Bacteroides_caccae{species}(91)	Bacteria	Bacteroidetes	Bacteroidia	Bacteroidales	Bacteroidaceae	Bacteroides	Bacteroides_caccae
ASV71	0	0	170	0	0	0	57	0	1426	0	201	0	0	0	0	3015	0	0	0	0	0	0	202	0	0	0	49	0	683	0	75	0	111	56	0	0	666	0	0	0	6711	Bacteria{superkingdom}(100);Firmicutes{phylum}(100);Clostridia{class}(100);Clostridiales{order}(100);Lachnospiraceae{family}(100);Ruminococcus2{genus}(100);Unassigned{species}(0)	Bacteria	Firmicutes	Clostridia	Clostridiales	Lachnospiraceae	Ruminococcus2	Unassigned
ASV73	0	0	0	0	0	0	0	0	0	0	17	0	0	0	0	0	0	0	46	0	0	0	0	0	0	0	0	0	0	0	0	0	0	0	0	0	0	0	0	0	63	Bacteria{superkingdom}(99);Firmicutes{phylum}(99);Bacilli{class}(99);Lactobacillales{order}(99);Enterococcaceae{family}(99);Enterococcus{genus}(99);Unassigned{species}(0)	Bacteria	Firmicutes	Bacilli	Lactobacillales	Enterococcaceae	Enterococcus	Unassigned
ASV74	131	0	37	37	99	59	113	210	148	109	34	21	0	26	532	31	0	277	261	112	0	17	46	110	104	74	73	554	42	80	72	45	114	85	24	70	97	64	0	148	4056	Bacteria{superkingdom}(100);Firmicutes{phylum}(100);Clostridia{class}(100);Clostridiales{order}(100);Lachnospiraceae{family}(100);Coprococcus{genus}(100);Unassigned{species}(0)	Bacteria	Firmicutes	Clostridia	Clostridiales	Lachnospiraceae	Coprococcus	Unassigned
ASV75	0	435	3	62	54	0	0	0	0	0	0	56	19	0	0	0	0	330	0	0	573	0	0	29	102	0	0	0	0	0	25	448	20	432	0	0	1967	40	815	0	5410	Bacteria{superkingdom}(94);Bacteroidetes{phylum}(94);Bacteroidia{class}(94);Bacteroidales{order}(94);Bacteroidaceae{family}(94);Bacteroides{genus}(94);Bacteroides_stercoris{species}(94)	Bacteria	Bacteroidetes	Bacteroidia	Bacteroidales	Bacteroidaceae	Bacteroides	Bacteroides_stercoris
ASV76	0	0	0	0	0	800	0	0	0	1218	0	281	169	1969	0	0	0	0	0	0	0	0	0	0	0	1290	0	0	20	233	0	243	450	0	1312	0	0	0	0	0	7985	Bacteria{superkingdom}(85);Firmicutes{phylum}(85);Clostridia{class}(85);Clostridiales{order}(85);Ruminococcaceae{family}(85);Ruminococcus{genus}(85);Ruminococcus_bromii{species}(85)	Bacteria	Firmicutes	Clostridia	Clostridiales	Ruminococcaceae	Ruminococcus	Ruminococcus_bromii
ASV77	104	68	7	166	67	666	128	97	73	9	303	13	0	91	84	59	260	84	84	0	78	130	14	312	36	688	38	48	51	0	202	0	151	197	185	30	80	96	0	0	4699	Bacteria{superkingdom}(100);Firmicutes{phylum}(100);Clostridia{class}(100);Clostridiales{order}(100);Lachnospiraceae{family}(100);Blautia{genus}(100);Unassigned{species}(0)	Bacteria	Firmicutes	Clostridia	Clostridiales	Lachnospiraceae	Blautia	Unassigned
ASV78	0	0	0	640	0	0	0	0	0	0	0	0	0	0	0	0	0	0	0	0	0	3	0	576	0	0	0	0	0	0	0	0	0	0	0	0	0	0	0	0	1219	Bacteria{superkingdom}(98);Bacteroidetes{phylum}(98);Bacteroidia{class}(98);Bacteroidales{order}(98);Bacteroidaceae{family}(98);Bacteroides{genus}(98);Bacteroides_coprophilus{species}(98)	Bacteria	Bacteroidetes	Bacteroidia	Bacteroidales	Bacteroidaceae	Bacteroides	Bacteroides_coprophilus
ASV79	0	56	0	143	0	497	0	830	0	166	189	182	129	175	0	0	172	336	0	0	227	8	0	689	0	620	0	991	0	184	127	141	0	153	322	0	0	103	0	0	6440	Bacteria{superkingdom}(100);Actinobacteria{phylum}(100);Actinobacteria{class}(100);Bifidobacteriales{order}(100);Bifidobacteriaceae{family}(100);Bifidobacterium{genus}(100);Unassigned{species}(0)	Bacteria	Actinobacteria	Actinobacteria	Bifidobacteriales	Bifidobacteriaceae	Bifidobacterium	Unassigned
ASV80	0	0	0	164	0	0	0	0	0	0	102	0	0	0	0	0	42	0	0	0	0	0	0	57	0	0	0	0	0	0	0	0	0	0	0	0	0	158	0	0	523	Bacteria{superkingdom}(100);Firmicutes{phylum}(100);Negativicutes{class}(100);Selenomonadales{order}(100);Veillonellaceae{family}(100);Megasphaera{genus}(100);Unassigned{species}(0)	Bacteria	Firmicutes	Negativicutes	Selenomonadales	Veillonellaceae	Megasphaera	Unassigned
ASV81	0	0	0	883	438	0	14	0	86	1150	0	0	0	0	0	1	189	0	0	0	0	1105	0	542	1557	0	9	0	303	487	0	0	0	109	0	268	0	174	0	0	7315	Bacteria{superkingdom}(92);Firmicutes{phylum}(92);Clostridia{class}(92);Clostridiales{order}(92);Eubacteriaceae{family}(92);Eubacterium{genus}(92);uncultured_Clostridiales_bacterium{species}(92)	Bacteria	Firmicutes	Clostridia	Clostridiales	Eubacteriaceae	Eubacterium	uncultured_Clostridiales_bacterium
ASV82	0	0	0	0	0	0	0	0	0	0	0	0	0	0	0	0	0	13	0	0	0	0	0	0	0	0	0	0	0	0	0	0	0	0	0	0	0	0	3490	0	3503	Bacteria{superkingdom}(100);Fusobacteria{phylum}(100);Fusobacteriia{class}(100);Fusobacteriales{order}(100);Fusobacteriaceae{family}(100);Fusobacterium{genus}(100);Unassigned{species}(0)	Bacteria	Fusobacteria	Fusobacteriia	Fusobacteriales	Fusobacteriaceae	Fusobacterium	Unassigned
ASV83	0	0	0	0	0	0	0	0	0	247	0	0	0	0	0	0	402	1956	0	167	0	16	0	0	0	0	0	0	0	772	0	17	0	0	0	0	0	277	0	492	4346	Bacteria{superkingdom}(100);Actinobacteria{phylum}(100);Actinobacteria{class}(100);Coriobacteriales{order}(100);Coriobacteriaceae{family}(100);Collinsella{genus}(100);Unassigned{species}(0)	Bacteria	Actinobacteria	Actinobacteria	Coriobacteriales	Coriobacteriaceae	Collinsella	Unassigned
ASV84	0	0	0	0	0	31	0	0	58	0	0	0	0	0	0	0	27	127	0	0	0	0	0	0	0	55	0	0	346	0	0	0	128	0	0	385	0	91	0	0	1248	Bacteria{superkingdom}(97);Bacteroidetes{phylum}(97);Bacteroidia{class}(97);Bacteroidales{order}(97);Bacteroidaceae{family}(97);Bacteroides{genus}(97);Bacteroides_caccae{species}(97)	Bacteria	Bacteroidetes	Bacteroidia	Bacteroidales	Bacteroidaceae	Bacteroides	Bacteroides_caccae
ASV85	0	371	98	337	326	16	0	716	154	323	91	42	0	82	489	289	103	0	0	268	248	50	0	144	262	64	1	266	35	54	0	63	12	56	120	40	232	39	0	337	5728	Bacteria{superkingdom}(100);Firmicutes{phylum}(100);Clostridia{class}(100);Clostridiales{order}(100);Ruminococcaceae{family}(100);Butyricicoccus{genus}(100);Unassigned{species}(0)	Bacteria	Firmicutes	Clostridia	Clostridiales	Ruminococcaceae	Butyricicoccus	Unassigned
ASV86	0	0	0	0	0	0	0	0	0	0	0	0	0	0	0	4	0	0	0	0	0	294	0	0	0	0	0	0	0	0	0	0	0	0	0	0	0	0	0	0	298	Bacteria{superkingdom}(100);Firmicutes{phylum}(100);Clostridia{class}(100);Clostridiales{order}(100);Unassigned{family}(0);Unassigned{genus}(0);Unassigned{species}(0)	Bacteria	Firmicutes	Clostridia	Clostridiales	Unassigned	Unassigned	Unassigned
ASV87	0	17	33	43	36	278	4	0	8	265	177	11	0	34	146	0	6	0	9	13	83	0	429	127	7	553	216	30	0	227	13	283	73	37	104	0	24	79	164	0	3529	Bacteria{superkingdom}(98);Firmicutes{phylum}(98);Clostridia{class}(98);Clostridiales{order}(98);Peptostreptococcaceae{family}(98);Intestinibacter{genus}(98);Unassigned{species}(0)	Bacteria	Firmicutes	Clostridia	Clostridiales	Peptostreptococcaceae	Intestinibacter	Unassigned
ASV88	0	528	63	0	33	212	14	19	0	0	45	0	0	0	320	0	246	78	29	0	89	74	732	169	0	0	280	0	51	213	5	39	45	67	0	0	0	130	0	0	3481	Bacteria{superkingdom}(100);Firmicutes{phylum}(100);Clostridia{class}(100);Clostridiales{order}(100);Clostridiaceae_1{family}(100);Unassigned{genus}(0);Unassigned{species}(0)	Bacteria	Firmicutes	Clostridia	Clostridiales	Clostridiaceae_1	Unassigned	Unassigned
ASV90	0	138	0	0	0	35	0	0	0	53	0	78	0	42	0	0	15	87	0	174	431	138	0	0	0	69	104	673	61	143	186	39	29	55	10	494	49	154	0	198	3455	Bacteria{superkingdom}(100);Bacteroidetes{phylum}(100);Bacteroidia{class}(100);Bacteroidales{order}(100);Bacteroidaceae{family}(100);Bacteroides{genus}(100);Unassigned{species}(0)	Bacteria	Bacteroidetes	Bacteroidia	Bacteroidales	Bacteroidaceae	Bacteroides	Unassigned
ASV91	0	0	0	0	0	41	190	0	0	0	0	26	0	195	0	0	0	0	30	0	0	166	0	0	0	70	472	0	147	0	30	0	104	76	0	64	0	84	0	0	1695	Bacteria{superkingdom}(97);Firmicutes{phylum}(97);Clostridia{class}(97);Clostridiales{order}(97);Lachnospiraceae{family}(97);{genus}(97);Unassigned{species}(0)	Bacteria	Firmicutes	Clostridia	Clostridiales	Lachnospiraceae		Unassigned
ASV92	0	0	0	0	0	0	0	17	0	1163	0	0	0	0	86	0	0	455	0	122	0	0	0	0	2	0	0	961	0	1175	0	0	0	4136	0	0	0	0	0	164	8281	Bacteria{superkingdom}(100);Bacteroidetes{phylum}(100);Bacteroidia{class}(100);Bacteroidales{order}(100);Bacteroidaceae{family}(100);Bacteroides{genus}(100);Unassigned{species}(0)	Bacteria	Bacteroidetes	Bacteroidia	Bacteroidales	Bacteroidaceae	Bacteroides	Unassigned
ASV94	0	0	0	0	0	7	18	0	0	0	0	0	0	0	0	0	0	15	11	0	0	83	0	0	0	11	183	0	0	0	0	0	212	0	0	0	0	326	0	0	866	Bacteria{superkingdom}(96);Firmicutes{phylum}(96);Clostridia{class}(96);Clostridiales{order}(96);Lachnospiraceae{family}(96);Lachnospiracea_incertae_sedis{genus}(96);Unassigned{species}(0)	Bacteria	Firmicutes	Clostridia	Clostridiales	Lachnospiraceae	Lachnospiracea_incertae_sedis	Unassigned
ASV95	0	2316	0	35	0	208	0	0	0	208	0	148	16	91	0	0	16	87	75	0	684	83	0	124	9	135	0	0	100	284	55	168	0	79	0	372	10	32	0	0	5335	Bacteria{superkingdom}(100);Bacteroidetes{phylum}(100);Bacteroidia{class}(100);Bacteroidales{order}(100);Bacteroidaceae{family}(100);Bacteroides{genus}(100);Unassigned{species}(0)	Bacteria	Bacteroidetes	Bacteroidia	Bacteroidales	Bacteroidaceae	Bacteroides	Unassigned
ASV96	210	17	0	191	112	44	16	0	0	962	93	467	0	142	0	338	0	173	0	82	0	75	0	366	67	137	22	15	0	36	686	120	14	0	181	15	230	26	0	34	4871	Bacteria{superkingdom}(100);Firmicutes{phylum}(100);Clostridia{class}(100);Clostridiales{order}(100);Lachnospiraceae{family}(100);Lachnospiracea_incertae_sedis{genus}(100);Unassigned{species}(0)	Bacteria	Firmicutes	Clostridia	Clostridiales	Lachnospiraceae	Lachnospiracea_incertae_sedis	Unassigned
ASV97	0	957	0	0	0	0	0	0	0	0	0	0	0	0	0	0	143	0	0	0	6015	0	0	0	0	0	0	0	0	0	0	0	0	0	0	0	389	266	0	0	7770	Bacteria{superkingdom}(99);Bacteroidetes{phylum}(99);Bacteroidia{class}(99);Bacteroidales{order}(99);Bacteroidaceae{family}(99);Bacteroides{genus}(99);Bacteroides_uniformis{species}(99)	Bacteria	Bacteroidetes	Bacteroidia	Bacteroidales	Bacteroidaceae	Bacteroides	Bacteroides_uniformis
ASV98	0	0	63	156	0	0	532	325	181	44	0	83	0	0	0	70	81	164	20	33	0	173	42	290	0	0	298	120	236	0	0	39	0	35	0	62	57	39	0	124	3267	Bacteria{superkingdom}(100);Firmicutes{phylum}(100);Clostridia{class}(100);Clostridiales{order}(100);Lachnospiraceae{family}(100);Unassigned{genus}(0);Unassigned{species}(0)	Bacteria	Firmicutes	Clostridia	Clostridiales	Lachnospiraceae	Unassigned	Unassigned
ASV99	0	153	342	92	108	0	365	1393	30	0	99	86	15	0	94	163	121	18	119	627	74	0	36	60	69	0	170	528	0	0	36	141	0	0	0	0	172	0	24	500	5635	Bacteria{superkingdom}(100);Firmicutes{phylum}(100);Clostridia{class}(100);Clostridiales{order}(100);Ruminococcaceae{family}(100);Butyricicoccus{genus}(100);Unassigned{species}(0)	Bacteria	Firmicutes	Clostridia	Clostridiales	Ruminococcaceae	Butyricicoccus	Unassigned
ASV100	73	212	9	102	0	13	0	155	0	62	6	49	0	62	0	0	0	38	21	13	134	144	11	0	0	30	0	53	14	21	98	27	0	16	30	230	0	59	0	13	1695	Bacteria{superkingdom}(94);Firmicutes{phylum}(94);Clostridia{class}(94);Clostridiales{order}(94);Lachnospiraceae{family}(94);Clostridium_XlVa{genus}(94);Unassigned{species}(0)	Bacteria	Firmicutes	Clostridia	Clostridiales	Lachnospiraceae	Clostridium_XlVa	Unassigned
ASV101	0	50	0	0	26	52	0	0	0	0	121	33	0	0	0	0	0	0	147	0	0	0	0	0	69	269	28	0	69	0	419	0	0	135	0	568	0	0	0	0	1986	Bacteria{superkingdom}(100);Firmicutes{phylum}(100);Clostridia{class}(100);Clostridiales{order}(100);Lachnospiraceae{family}(100);Roseburia{genus}(100);Unassigned{species}(0)	Bacteria	Firmicutes	Clostridia	Clostridiales	Lachnospiraceae	Roseburia	Unassigned
ASV102	0	0	0	0	0	0	0	0	0	0	0	0	0	0	0	0	0	85	8331	0	0	0	0	0	0	0	0	0	0	0	0	0	0	0	0	0	0	0	0	0	8416	Bacteria{superkingdom}(100);Verrucomicrobia{phylum}(100);Verrucomicrobiae{class}(100);Verrucomicrobiales{order}(100);Verrucomicrobiaceae{family}(100);Akkermansia{genus}(100);Unassigned{species}(0)	Bacteria	Verrucomicrobia	Verrucomicrobiae	Verrucomicrobiales	Verrucomicrobiaceae	Akkermansia	Unassigned
ASV103	20	154	216	108	30	0	16	200	0	24	0	30	0	35	0	0	41	32	8	292	74	16	151	17	6	0	5	37	15	0	28	12	9	0	14	0	0	40	28	57	1715	Bacteria{superkingdom}(99);Firmicutes{phylum}(99);Clostridia{class}(99);Clostridiales{order}(99);Lachnospiraceae{family}(99);Clostridium_XlVa{genus}(99);Unassigned{species}(0)	Bacteria	Firmicutes	Clostridia	Clostridiales	Lachnospiraceae	Clostridium_XlVa	Unassigned
ASV104	0	0	0	0	0	0	5	0	0	10	0	0	0	0	0	0	0	0	16	0	0	0	0	0	0	0	0	0	0	10	0	0	1	0	0	0	0	0	0	0	42	Bacteria{superkingdom}(89);Bacteroidetes{phylum}(89);Bacteroidia{class}(89);Bacteroidales{order}(89);Prevotellaceae{family}(89);Prevotella{genus}(89);Prevotella_copri{species}(89)	Bacteria	Bacteroidetes	Bacteroidia	Bacteroidales	Prevotellaceae	Prevotella	Prevotella_copri
ASV105	0	0	0	0	0	488	0	0	0	0	0	1046	0	0	0	0	4	103	0	0	0	0	0	0	0	638	12	9	0	0	0	845	0	775	0	1365	0	0	0	0	5285	Bacteria{superkingdom}(85);Bacteroidetes{phylum}(85);Bacteroidia{class}(85);Bacteroidales{order}(85);Rikenellaceae{family}(85);Alistipes{genus}(85);uncultured_organism{species}(85)	Bacteria	Bacteroidetes	Bacteroidia	Bacteroidales	Rikenellaceae	Alistipes	uncultured_organism
ASV106	352	32	304	23	391	0	58	0	282	16	0	14	0	0	1136	554	0	24	0	34	13	338	55	20	352	0	0	0	144	25	0	0	0	31	0	225	362	24	0	191	5000	Bacteria{superkingdom}(100);Firmicutes{phylum}(100);Clostridia{class}(100);Clostridiales{order}(100);Lachnospiraceae{family}(100);Unassigned{genus}(0);Unassigned{species}(0)	Bacteria	Firmicutes	Clostridia	Clostridiales	Lachnospiraceae	Unassigned	Unassigned
ASV109	0	80	0	0	0	0	133	0	0	0	2	0	16	0	148	0	0	873	0	133	2	0	0	0	0	0	79	195	0	0	0	11	0	0	0	0	0	0	0	184	1856	Bacteria{superkingdom}(100);Bacteroidetes{phylum}(100);Bacteroidia{class}(100);Bacteroidales{order}(100);Bacteroidaceae{family}(100);Bacteroides{genus}(100);Unassigned{species}(0)	Bacteria	Bacteroidetes	Bacteroidia	Bacteroidales	Bacteroidaceae	Bacteroides	Unassigned
ASV110	0	0	0	0	0	0	5	0	0	0	0	0	0	0	0	0	0	0	1	0	0	0	0	0	0	0	0	0	0	0	0	0	0	0	0	0	0	0	0	0	6	Bacteria{superkingdom}(100);Bacteroidetes{phylum}(100);Bacteroidia{class}(100);Bacteroidales{order}(100);Prevotellaceae{family}(100);Prevotella{genus}(100);Unassigned{species}(0)	Bacteria	Bacteroidetes	Bacteroidia	Bacteroidales	Prevotellaceae	Prevotella	Unassigned
ASV111	0	0	35	127	0	0	0	35	13	73	121	40	8	0	11	11	13	10	30	0	21	10	1915	205	0	0	101	0	0	78	9	62	127	6	33	26	96	31	0	0	3247	Bacteria{superkingdom}(86);Firmicutes{phylum}(86);Clostridia{class}(86);Clostridiales{order}(86);Peptostreptococcaceae{family}(86);Terrisporobacter{genus}(86);Unassigned{species}(0)	Bacteria	Firmicutes	Clostridia	Clostridiales	Peptostreptococcaceae	Terrisporobacter	Unassigned
ASV112	0	0	0	0	0	0	0	0	0	0	0	0	0	0	0	0	0	0	0	0	0	0	0	0	0	0	0	0	0	0	0	0	0	0	0	0	0	189	0	0	189	Bacteria{superkingdom}(100);Proteobacteria{phylum}(100);Gammaproteobacteria{class}(100);Enterobacteriales{order}(100);Enterobacteriaceae{family}(100);Unassigned{genus}(0);Unassigned{species}(0)	Bacteria	Proteobacteria	Gammaproteobacteria	Enterobacteriales	Enterobacteriaceae	Unassigned	Unassigned
ASV114	61	0	12	82	16	78	146	0	35	119	64	23	0	0	0	77	357	18	22	201	0	15	0	143	8	118	217	0	50	46	43	20	68	0	0	44	140	120	0	368	2711	Bacteria{superkingdom}(100);Firmicutes{phylum}(100);Clostridia{class}(100);Clostridiales{order}(100);Ruminococcaceae{family}(100);Unassigned{genus}(0);Unassigned{species}(0)	Bacteria	Firmicutes	Clostridia	Clostridiales	Ruminococcaceae	Unassigned	Unassigned
ASV115	0	0	0	33	2	0	133	0	0	0	78	0	0	0	35	0	9	0	0	0	0	0	0	37	26	46	54	13	0	6	0	10	37	0	3	18	35	0	0	0	575	Bacteria{superkingdom}(100);Firmicutes{phylum}(100);Bacilli{class}(100);Lactobacillales{order}(100);Lactobacillaceae{family}(100);Lactobacillus{genus}(100);Unassigned{species}(0)	Bacteria	Firmicutes	Bacilli	Lactobacillales	Lactobacillaceae	Lactobacillus	Unassigned
ASV116	0	0	932	0	0	0	0	0	0	0	0	0	0	0	0	0	86	0	0	0	0	0	120	0	0	0	0	0	0	0	0	0	0	238	0	0	0	26	0	0	1402	Bacteria{superkingdom}(100);Firmicutes{phylum}(100);Bacilli{class}(100);Lactobacillales{order}(100);Lactobacillaceae{family}(100);Lactobacillus{genus}(100);Unassigned{species}(0)	Bacteria	Firmicutes	Bacilli	Lactobacillales	Lactobacillaceae	Lactobacillus	Unassigned
ASV117	0	0	0	0	0	0	0	0	0	0	0	141	0	0	0	0	12	0	139	0	0	0	0	0	0	0	117	0	0	0	113	86	960	0	9	100	73	45	0	0	1795	Bacteria{superkingdom}(95);Firmicutes{phylum}(95);Clostridia{class}(95);Clostridiales{order}(95);Ruminococcaceae{family}(95);Oscillibacter{genus}(95);uncultured_rumen_bacterium{species}(95)	Bacteria	Firmicutes	Clostridia	Clostridiales	Ruminococcaceae	Oscillibacter	uncultured_rumen_bacterium
ASV118	0	0	0	2	0	257	0	0	0	0	0	0	0	0	0	0	11	0	136	0	0	0	0	35	0	229	0	0	0	0	1	23	55	0	18	0	101	17	0	0	885	Bacteria{superkingdom}(86);Firmicutes{phylum}(86);Clostridia{class}(86);Clostridiales{order}(86);Ruminococcaceae{family}(86);{genus}(86);Unassigned{species}(0)	Bacteria	Firmicutes	Clostridia	Clostridiales	Ruminococcaceae		Unassigned
ASV119	0	0	0	0	0	0	0	0	0	0	0	0	0	0	0	0	0	0	0	0	0	13	0	0	0	0	0	0	0	0	0	0	0	0	0	0	0	0	0	0	13	Bacteria{superkingdom}(100);Bacteroidetes{phylum}(100);Bacteroidia{class}(100);Bacteroidales{order}(100);Prevotellaceae{family}(100);Prevotella{genus}(100);Unassigned{species}(0)	Bacteria	Bacteroidetes	Bacteroidia	Bacteroidales	Prevotellaceae	Prevotella	Unassigned
ASV120	243	100	0	11	0	0	0	0	0	65	0	0	0	0	0	0	0	0	83	581	135	36	0	0	0	0	0	0	538	1356	16	0	0	1079	0	0	0	0	293	244	4780	Bacteria{superkingdom}(100);Bacteroidetes{phylum}(100);Bacteroidia{class}(100);Bacteroidales{order}(100);Bacteroidaceae{family}(100);Bacteroides{genus}(100);Unassigned{species}(0)	Bacteria	Bacteroidetes	Bacteroidia	Bacteroidales	Bacteroidaceae	Bacteroides	Unassigned
ASV121	0	567	0	1211	0	0	0	0	0	0	0	0	0	0	0	0	0	0	0	0	0	0	0	0	0	0	0	0	0	0	0	0	0	0	0	0	0	26	0	0	1804	Bacteria{superkingdom}(100);Firmicutes{phylum}(100);Negativicutes{class}(100);Selenomonadales{order}(100);Veillonellaceae{family}(100);Megamonas{genus}(100);Unassigned{species}(0)	Bacteria	Firmicutes	Negativicutes	Selenomonadales	Veillonellaceae	Megamonas	Unassigned
ASV122	3	0	39	114	0	9	0	0	0	0	0	114	0	0	0	0	0	17	0	0	0	0	722	0	0	0	0	0	58	0	0	60	15	0	0	0	0	0	25	0	1176	Bacteria{superkingdom}(98);Firmicutes{phylum}(98);Clostridia{class}(98);Clostridiales{order}(98);Clostridiaceae_1{family}(98);Clostridium_sensu_stricto{genus}(98);Unassigned{species}(0)	Bacteria	Firmicutes	Clostridia	Clostridiales	Clostridiaceae_1	Clostridium_sensu_stricto	Unassigned
ASV123	0	0	0	0	0	27	0	0	0	0	0	0	0	0	0	0	0	0	0	0	0	0	0	0	0	16	0	0	0	0	0	0	0	0	0	145	0	0	0	0	188	Bacteria{superkingdom}(100);Bacteroidetes{phylum}(100);Bacteroidia{class}(100);Bacteroidales{order}(100);Prevotellaceae{family}(100);Prevotella{genus}(100);Unassigned{species}(0)	Bacteria	Bacteroidetes	Bacteroidia	Bacteroidales	Prevotellaceae	Prevotella	Unassigned
ASV124	0	0	0	0	0	152	0	0	0	99	0	0	0	0	0	0	0	0	0	0	0	0	0	0	0	574	0	0	0	110	0	0	0	0	0	592	261	0	0	0	1788	Bacteria{superkingdom}(100);Firmicutes{phylum}(100);Clostridia{class}(100);Clostridiales{order}(100);Ruminococcaceae{family}(100);Faecalibacterium{genus}(100);Unassigned{species}(0)	Bacteria	Firmicutes	Clostridia	Clostridiales	Ruminococcaceae	Faecalibacterium	Unassigned
ASV125	285	129	19	94	28	16	0	16	94	74	101	44	94	50	0	61	32	216	0	0	395	66	23	64	0	13	0	45	42	318	43	46	48	33	33	96	25	27	0	0	2670	Bacteria{superkingdom}(100);Firmicutes{phylum}(100);Clostridia{class}(100);Clostridiales{order}(100);Lachnospiraceae{family}(100);Ruminococcus2{genus}(100);Unassigned{species}(0)	Bacteria	Firmicutes	Clostridia	Clostridiales	Lachnospiraceae	Ruminococcus2	Unassigned
ASV126	0	0	0	0	0	0	0	0	0	0	0	0	0	0	0	0	0	0	444	0	0	0	0	0	0	0	0	0	0	0	0	0	0	0	0	0	0	0	0	0	444	Bacteria{superkingdom}(100);Firmicutes{phylum}(100);Erysipelotrichia{class}(100);Erysipelotrichales{order}(100);Erysipelotrichaceae{family}(100);Catenibacterium{genus}(100);Unassigned{species}(0)	Bacteria	Firmicutes	Erysipelotrichia	Erysipelotrichales	Erysipelotrichaceae	Catenibacterium	Unassigned
ASV127	0	0	0	0	0	0	36	0	0	0	0	15	0	0	0	0	0	0	220	0	0	17	0	0	0	0	268	0	0	0	0	0	490	0	0	0	0	0	0	0	1046	Bacteria{superkingdom}(100);Firmicutes{phylum}(100);Clostridia{class}(100);Clostridiales{order}(100);Ruminococcaceae{family}(100);Oscillibacter{genus}(100);Unassigned{species}(0)	Bacteria	Firmicutes	Clostridia	Clostridiales	Ruminococcaceae	Oscillibacter	Unassigned
ASV128	0	0	0	10	0	0	0	0	0	0	0	287	0	0	0	0	31	134	30	0	0	292	0	63	0	0	26	0	0	44	0	148	0	97	0	361	170	39	0	0	1732	Bacteria{superkingdom}(100);Firmicutes{phylum}(100);Clostridia{class}(100);Clostridiales{order}(100);Lachnospiraceae{family}(100);Coprococcus{genus}(100);Unassigned{species}(0)	Bacteria	Firmicutes	Clostridia	Clostridiales	Lachnospiraceae	Coprococcus	Unassigned
ASV129	0	0	0	0	0	8	0	0	0	0	0	0	0	0	0	0	0	0	68	0	0	0	0	0	0	0	0	0	0	0	0	0	6	0	0	0	0	0	0	0	82	Bacteria{superkingdom}(87);Proteobacteria{phylum}(87);Deltaproteobacteria{class}(87);Bdellovibrionales{order}(87);Bdellovibrionaceae{family}(87);Vampirovibrio{genus}(87);uncultured_bacterium{species}(87)	Bacteria	Proteobacteria	Deltaproteobacteria	Bdellovibrionales	Bdellovibrionaceae	Vampirovibrio	uncultured_bacterium
ASV130	0	0	0	0	0	0	0	0	0	0	0	204	0	26	0	0	0	7	0	861	0	32	0	0	0	0	156	0	0	0	0	30	63	0	0	104	18	0	0	126	1627	Bacteria{superkingdom}(88);Bacteroidetes{phylum}(88);Bacteroidia{class}(88);Bacteroidales{order}(88);Bacteroidaceae{family}(88);Bacteroides{genus}(88);Bacteroides_cellulosilyticus{species}(88)	Bacteria	Bacteroidetes	Bacteroidia	Bacteroidales	Bacteroidaceae	Bacteroides	Bacteroides_cellulosilyticus
ASV131	84	0	0	154	0	15	12	0	0	0	0	0	0	0	0	0	23	131	258	0	0	9	0	88	0	50	74	0	0	903	61	0	19	238	0	10	52	60	0	0	2241	Bacteria{superkingdom}(95);Firmicutes{phylum}(95);Clostridia{class}(95);Clostridiales{order}(95);Ruminococcaceae{family}(95);Sporobacter{genus}(95);uncultured_bacterium{species}(95)	Bacteria	Firmicutes	Clostridia	Clostridiales	Ruminococcaceae	Sporobacter	uncultured_bacterium
ASV132	1920	0	0	0	0	0	0	0	0	0	0	0	0	533	0	88	0	0	0	0	0	0	0	0	0	0	0	0	0	0	0	23	0	0	71	0	0	0	89	0	2724	Bacteria{superkingdom}(100);Bacteroidetes{phylum}(100);Bacteroidia{class}(100);Bacteroidales{order}(100);Bacteroidaceae{family}(100);Bacteroides{genus}(100);Bacteroides_fragilis{species}(100)	Bacteria	Bacteroidetes	Bacteroidia	Bacteroidales	Bacteroidaceae	Bacteroides	Bacteroides_fragilis
ASV133	0	0	0	0	0	0	0	0	688	0	0	0	0	53	0	0	0	0	0	0	0	0	0	0	0	0	0	0	1024	0	0	0	0	0	57	0	0	0	0	0	1822	Bacteria{superkingdom}(100);Verrucomicrobia{phylum}(100);Verrucomicrobiae{class}(100);Verrucomicrobiales{order}(100);Verrucomicrobiaceae{family}(100);Akkermansia{genus}(100);Unassigned{species}(0)	Bacteria	Verrucomicrobia	Verrucomicrobiae	Verrucomicrobiales	Verrucomicrobiaceae	Akkermansia	Unassigned
ASV134	70	0	0	0	0	0	0	0	58	56	0	23	0	0	0	0	0	15	74	0	0	0	0	41	0	0	27	0	80	42	220	72	38	8	0	0	34	40	0	0	898	Bacteria{superkingdom}(100);Firmicutes{phylum}(100);Clostridia{class}(100);Clostridiales{order}(100);Ruminococcaceae{family}(100);Faecalibacterium{genus}(100);Unassigned{species}(0)	Bacteria	Firmicutes	Clostridia	Clostridiales	Ruminococcaceae	Faecalibacterium	Unassigned
ASV135	139	70	6	85	0	0	0	69	21	4	0	18	347	0	920	91	61	5	0	338	249	45	9	19	0	0	0	113	17	7	2	61	0	5	0	0	22	10	0	557	3290	Bacteria{superkingdom}(100);Firmicutes{phylum}(100);Clostridia{class}(100);Clostridiales{order}(100);Lachnospiraceae{family}(100);Clostridium_XlVb{genus}(100);Unassigned{species}(0)	Bacteria	Firmicutes	Clostridia	Clostridiales	Lachnospiraceae	Clostridium_XlVb	Unassigned
ASV136	0	0	0	0	0	0	0	0	0	0	0	0	109	0	0	0	0	0	0	0	0	0	0	0	0	0	0	0	0	0	0	0	0	0	0	0	0	0	0	0	109	Bacteria{superkingdom}(100);Firmicutes{phylum}(100);Negativicutes{class}(100);Selenomonadales{order}(100);Veillonellaceae{family}(100);Veillonella{genus}(100);Unassigned{species}(0)	Bacteria	Firmicutes	Negativicutes	Selenomonadales	Veillonellaceae	Veillonella	Unassigned
ASV137	0	0	0	0	0	0	55	0	0	0	0	0	0	0	0	0	131	0	0	0	0	0	0	0	0	0	0	0	0	0	0	0	0	0	0	0	0	103	0	0	289	Bacteria{superkingdom}(100);Bacteroidetes{phylum}(100);Bacteroidia{class}(100);Bacteroidales{order}(100);Prevotellaceae{family}(100);Prevotella{genus}(100);Unassigned{species}(0)	Bacteria	Bacteroidetes	Bacteroidia	Bacteroidales	Prevotellaceae	Prevotella	Unassigned
ASV138	18	46	51	12	54	0	64	36	94	85	0	0	244	67	0	0	0	122	0	272	86	0	55	50	87	0	57	94	44	0	0	0	26	0	31	22	0	0	2	183	1902	Bacteria{superkingdom}(100);Firmicutes{phylum}(100);Clostridia{class}(100);Clostridiales{order}(100);Lachnospiraceae{family}(100);Anaerostipes{genus}(100);Unassigned{species}(0)	Bacteria	Firmicutes	Clostridia	Clostridiales	Lachnospiraceae	Anaerostipes	Unassigned
ASV140	0	0	0	0	49	37	0	0	0	0	0	171	0	1194	0	0	0	0	0	0	0	0	0	0	61	21	0	0	0	0	0	220	0	108	114	315	0	0	186	0	2476	Bacteria{superkingdom}(91);Bacteroidetes{phylum}(91);Bacteroidia{class}(91);Bacteroidales{order}(91);Bacteroidaceae{family}(91);Bacteroides{genus}(91);Bacteroides_vulgatus{species}(91)	Bacteria	Bacteroidetes	Bacteroidia	Bacteroidales	Bacteroidaceae	Bacteroides	Bacteroides_vulgatus
ASV141	0	0	0	0	0	0	11	0	0	0	0	0	0	0	0	0	0	0	0	0	0	1	0	0	0	0	1527	0	0	0	0	0	0	0	0	0	0	0	0	0	1539	Bacteria{superkingdom}(100);Bacteroidetes{phylum}(100);Bacteroidia{class}(100);Bacteroidales{order}(100);Porphyromonadaceae{family}(100);{genus}(100);uncultured_Firmicutes_bacterium{species}(100)	Bacteria	Bacteroidetes	Bacteroidia	Bacteroidales	Porphyromonadaceae		uncultured_Firmicutes_bacterium
ASV142	0	28	66	45	22	0	0	243	16	84	14	47	0	82	22	75	53	0	0	0	6	15	224	5	13	0	0	30	14	11	66	24	0	0	30	20	0	46	0	0	1301	Bacteria{superkingdom}(98);Firmicutes{phylum}(98);Clostridia{class}(98);Clostridiales{order}(98);Lachnospiraceae{family}(98);Clostridium_XlVa{genus}(98);Unassigned{species}(0)	Bacteria	Firmicutes	Clostridia	Clostridiales	Lachnospiraceae	Clostridium_XlVa	Unassigned
ASV143	0	0	0	0	0	0	0	0	0	0	0	0	0	0	0	0	0	0	0	0	0	0	0	0	0	0	62	0	0	0	0	0	16	0	0	680	0	0	0	0	758	Bacteria{superkingdom}(97);Bacteroidetes{phylum}(97);Bacteroidia{class}(97);Bacteroidales{order}(97);Bacteroidaceae{family}(97);Bacteroides{genus}(97);Bacteroides_plebeius{species}(97)	Bacteria	Bacteroidetes	Bacteroidia	Bacteroidales	Bacteroidaceae	Bacteroides	Bacteroides_plebeius
ASV144	0	0	0	464	0	0	0	0	0	0	0	0	0	0	0	0	0	0	0	0	0	0	0	1782	0	0	0	0	0	0	0	0	0	0	0	0	0	0	0	0	2246	Bacteria{superkingdom}(98);Bacteroidetes{phylum}(98);Bacteroidia{class}(98);Bacteroidales{order}(98);Bacteroidaceae{family}(98);Bacteroides{genus}(98);uncultured_proteobacterium{species}(98)	Bacteria	Bacteroidetes	Bacteroidia	Bacteroidales	Bacteroidaceae	Bacteroides	uncultured_proteobacterium
ASV145	0	0	0	0	0	0	13	0	6	0	0	65	0	659	0	0	12	89	0	36	0	0	0	0	0	0	22	0	37	0	0	68	0	331	102	0	0	98	0	79	1617	Bacteria{superkingdom}(100);Firmicutes{phylum}(100);Clostridia{class}(100);Clostridiales{order}(100);Ruminococcaceae{family}(100);Ruminococcus{genus}(100);Ruminococcus_callidus{species}(100)	Bacteria	Firmicutes	Clostridia	Clostridiales	Ruminococcaceae	Ruminococcus	Ruminococcus_callidus
ASV146	6	5	435	29	275	0	14	0	51	20	239	28	67	21	58	12	15	6	0	0	17	4	57	34	0	3	8	75	6	72	0	20	5	53	83	0	131	0	0	0	1849	Bacteria{superkingdom}(100);Firmicutes{phylum}(100);Erysipelotrichia{class}(100);Erysipelotrichales{order}(100);Erysipelotrichaceae{family}(100);Turicibacter{genus}(100);Unassigned{species}(0)	Bacteria	Firmicutes	Erysipelotrichia	Erysipelotrichales	Erysipelotrichaceae	Turicibacter	Unassigned
ASV147	46	42	0	8	0	0	29	0	49	121	19	40	0	17	34	38	72	105	27	35	26	71	0	15	0	27	38	0	15	54	77	100	71	42	14	60	47	124	0	195	1658	Bacteria{superkingdom}(100);Firmicutes{phylum}(100);Clostridia{class}(100);Clostridiales{order}(100);Lachnospiraceae{family}(100);Blautia{genus}(100);Unassigned{species}(0)	Bacteria	Firmicutes	Clostridia	Clostridiales	Lachnospiraceae	Blautia	Unassigned
ASV148	0	0	0	0	0	0	0	0	0	0	0	0	0	0	0	0	0	0	0	0	49	0	0	0	0	0	0	0	0	0	0	0	0	0	0	0	0	0	0	0	49	Bacteria{superkingdom}(98);Firmicutes{phylum}(98);Clostridia{class}(98);Clostridiales{order}(98);Eubacteriaceae{family}(98);Eubacterium{genus}(98);uncultured_Clostridiales_bacterium{species}(98)	Bacteria	Firmicutes	Clostridia	Clostridiales	Eubacteriaceae	Eubacterium	uncultured_Clostridiales_bacterium
ASV149	5	1648	0	0	0	31	8	0	0	54	0	0	0	120	0	14	56	60	0	0	648	58	0	0	0	15	35	0	65	219	2	0	70	127	47	55	148	54	0	0	3539	Bacteria{superkingdom}(96);Bacteroidetes{phylum}(96);Bacteroidia{class}(96);Bacteroidales{order}(96);Bacteroidaceae{family}(96);Bacteroides{genus}(96);Bacteroides_ovatus{species}(96)	Bacteria	Bacteroidetes	Bacteroidia	Bacteroidales	Bacteroidaceae	Bacteroides	Bacteroides_ovatus
ASV150	0	0	0	0	0	0	0	0	0	0	0	0	0	0	0	0	348	0	0	0	0	0	0	0	0	0	0	0	0	0	0	0	0	0	0	0	0	525	0	0	873	Bacteria{superkingdom}(100);Firmicutes{phylum}(100);Clostridia{class}(100);Clostridiales{order}(100);Ruminococcaceae{family}(100);Faecalibacterium{genus}(100);Unassigned{species}(0)	Bacteria	Firmicutes	Clostridia	Clostridiales	Ruminococcaceae	Faecalibacterium	Unassigned
ASV151	0	0	0	0	0	0	0	0	0	0	0	0	83	0	0	0	0	0	0	0	0	0	0	0	0	0	0	0	0	0	0	0	0	0	0	0	0	0	0	0	83	Bacteria{superkingdom}(83);Firmicutes{phylum}(83);Negativicutes{class}(83);Selenomonadales{order}(83);Veillonellaceae{family}(83);Veillonella{genus}(83);Veillonella_sp._FFA-2014{species}(83)	Bacteria	Firmicutes	Negativicutes	Selenomonadales	Veillonellaceae	Veillonella	Veillonella_sp._FFA-2014
ASV153	0	0	0	8	0	191	0	0	0	0	0	0	0	0	0	0	0	0	564	0	0	0	0	66	0	323	0	0	0	0	0	0	167	0	0	0	0	0	0	0	1319	Bacteria{superkingdom}(89);Firmicutes{phylum}(89);Clostridia{class}(89);Clostridiales{order}(89);Ruminococcaceae{family}(89);Anaerobacterium{genus}(89);uncultured_bacterium{species}(89)	Bacteria	Firmicutes	Clostridia	Clostridiales	Ruminococcaceae	Anaerobacterium	uncultured_bacterium
ASV154	0	0	0	0	0	0	0	0	0	18	0	0	0	0	0	0	0	0	42	102	0	0	0	0	0	0	0	0	0	0	0	0	339	0	0	0	0	0	0	136	637	Bacteria{superkingdom}(84);Firmicutes{phylum}(84);Clostridia{class}(84);Clostridiales{order}(84);Lachnospiraceae{family}(84);Ruminococcus2{genus}(84);uncultured_organism{species}(84)	Bacteria	Firmicutes	Clostridia	Clostridiales	Lachnospiraceae	Ruminococcus2	uncultured_organism
ASV155	0	0	0	0	0	0	0	0	0	0	0	0	0	0	0	0	0	0	0	0	0	97	0	0	0	0	0	0	0	0	0	0	0	0	0	0	0	0	0	0	97	Bacteria{superkingdom}(100);Firmicutes{phylum}(100);Negativicutes{class}(100);Selenomonadales{order}(100);Acidaminococcaceae{family}(100);Phascolarctobacterium{genus}(100);Unassigned{species}(0)	Bacteria	Firmicutes	Negativicutes	Selenomonadales	Acidaminococcaceae	Phascolarctobacterium	Unassigned
ASV156	0	0	0	0	0	0	0	0	27	0	0	0	0	0	139	0	0	0	0	0	0	0	0	0	0	0	0	0	3	0	0	0	0	0	0	0	0	0	0	0	169	Bacteria{superkingdom}(100);Firmicutes{phylum}(100);Bacilli{class}(100);Lactobacillales{order}(100);Lactobacillaceae{family}(100);Lactobacillus{genus}(100);Unassigned{species}(0)	Bacteria	Firmicutes	Bacilli	Lactobacillales	Lactobacillaceae	Lactobacillus	Unassigned
ASV157	0	0	0	0	0	0	113	0	0	0	0	0	0	0	0	0	0	0	22	0	0	0	0	0	0	0	11	0	0	0	0	0	14	0	0	0	0	0	0	0	160	Bacteria{superkingdom}(100);Bacteroidetes{phylum}(100);Bacteroidia{class}(100);Bacteroidales{order}(100);Prevotellaceae{family}(100);Prevotella{genus}(100);Unassigned{species}(0)	Bacteria	Bacteroidetes	Bacteroidia	Bacteroidales	Prevotellaceae	Prevotella	Unassigned
ASV158	0	0	0	0	24	0	0	0	5	0	0	0	0	11	0	13	0	0	0	0	0	193	223	0	0	0	0	0	24	0	8	0	0	0	48	0	0	0	0	27	576	Bacteria{superkingdom}(100);Proteobacteria{phylum}(100);Gammaproteobacteria{class}(100);Enterobacteriales{order}(100);Enterobacteriaceae{family}(100);Unassigned{genus}(0);Unassigned{species}(0)	Bacteria	Proteobacteria	Gammaproteobacteria	Enterobacteriales	Enterobacteriaceae	Unassigned	Unassigned
ASV159	0	0	0	144	21	0	0	651	43	195	133	0	0	0	0	15	0	0	0	28	0	0	0	234	11	0	0	352	51	151	65	0	169	0	0	107	96	0	0	75	2541	Bacteria{superkingdom}(100);Firmicutes{phylum}(100);Clostridia{class}(100);Clostridiales{order}(100);Lachnospiraceae{family}(100);Blautia{genus}(100);Unassigned{species}(0)	Bacteria	Firmicutes	Clostridia	Clostridiales	Lachnospiraceae	Blautia	Unassigned
ASV160	0	0	0	0	0	37	0	0	0	0	0	0	0	20	0	0	20	71	27	0	0	174	0	0	0	345	0	0	0	0	0	0	0	0	5	0	0	140	0	0	839	Bacteria{superkingdom}(96);Firmicutes{phylum}(96);Clostridia{class}(96);Clostridiales{order}(96);Lachnospiraceae{family}(96);Coprococcus{genus}(96);butyrate-producing_bacterium_L2-50{species}(96)	Bacteria	Firmicutes	Clostridia	Clostridiales	Lachnospiraceae	Coprococcus	butyrate-producing_bacterium_L2-50
ASV161	0	0	0	0	0	0	0	0	0	0	0	0	0	0	0	0	286	279	46	0	0	21	0	0	0	0	0	0	0	0	0	0	0	104	0	43	520	632	0	0	1931	Bacteria{superkingdom}(100);Bacteroidetes{phylum}(100);Bacteroidia{class}(100);Bacteroidales{order}(100);Porphyromonadaceae{family}(100);Barnesiella{genus}(100);Unassigned{species}(0)	Bacteria	Bacteroidetes	Bacteroidia	Bacteroidales	Porphyromonadaceae	Barnesiella	Unassigned
ASV162	2	0	0	0	0	0	0	0	74	0	0	0	0	0	0	0	0	0	0	0	0	93	1443	0	0	0	4	0	0	0	0	0	0	0	28	0	0	0	54	0	1698	Bacteria{superkingdom}(100);Proteobacteria{phylum}(100);Gammaproteobacteria{class}(100);Pasteurellales{order}(100);Pasteurellaceae{family}(100);Haemophilus{genus}(100);Unassigned{species}(0)	Bacteria	Proteobacteria	Gammaproteobacteria	Pasteurellales	Pasteurellaceae	Haemophilus	Unassigned
ASV163	0	0	0	0	0	21	14	0	0	0	0	73	0	28	0	0	44	16	0	45	0	107	0	32	5	30	135	0	166	2	144	50	15	84	22	22	58	173	0	100	1386	Bacteria{superkingdom}(100);Bacteroidetes{phylum}(100);Bacteroidia{class}(100);Bacteroidales{order}(100);Porphyromonadaceae{family}(100);Odoribacter{genus}(100);Unassigned{species}(0)	Bacteria	Bacteroidetes	Bacteroidia	Bacteroidales	Porphyromonadaceae	Odoribacter	Unassigned
ASV164	0	0	0	0	0	0	0	0	0	0	0	0	0	0	0	0	0	0	75	0	0	17	0	0	0	0	0	0	0	0	0	0	0	0	0	0	0	0	0	0	92	Bacteria{superkingdom}(89);Firmicutes{phylum}(89);Clostridia{class}(89);Clostridiales{order}(89);Ruminococcaceae{family}(89);Oscillibacter{genus}(89);uncultured_Bacteroidetes_bacterium{species}(89)	Bacteria	Firmicutes	Clostridia	Clostridiales	Ruminococcaceae	Oscillibacter	uncultured_Bacteroidetes_bacterium
ASV165	356	251	90	1086	175	0	0	0	0	0	0	0	0	0	25	0	0	0	1	0	197	0	242	7	294	0	0	0	0	0	0	0	0	0	0	0	0	0	8	0	2732	Bacteria{superkingdom}(100);Proteobacteria{phylum}(100);Betaproteobacteria{class}(100);Burkholderiales{order}(100);Sutterellaceae{family}(100);Parasutterella{genus}(100);Unassigned{species}(0)	Bacteria	Proteobacteria	Betaproteobacteria	Burkholderiales	Sutterellaceae	Parasutterella	Unassigned
ASV166	4	0	0	0	0	0	0	0	0	3	0	0	0	25	0	0	0	0	40	156	0	0	0	0	29	0	0	117	137	13	267	0	53	169	0	1	0	42	0	187	1243	Bacteria{superkingdom}(97);Bacteroidetes{phylum}(97);Bacteroidia{class}(97);Bacteroidales{order}(97);Bacteroidaceae{family}(97);Bacteroides{genus}(97);Bacteroides_ovatus{species}(97)	Bacteria	Bacteroidetes	Bacteroidia	Bacteroidales	Bacteroidaceae	Bacteroides	Bacteroides_ovatus
ASV167	0	0	0	0	0	0	0	0	0	843	0	106	0	59	0	0	101	0	0	0	0	0	0	19	0	0	0	0	41	1145	1	105	0	0	0	0	74	156	0	0	2650	Bacteria{superkingdom}(96);Bacteroidetes{phylum}(96);Bacteroidia{class}(96);Bacteroidales{order}(96);Bacteroidaceae{family}(96);Bacteroides{genus}(96);Bacteroides_ovatus{species}(96)	Bacteria	Bacteroidetes	Bacteroidia	Bacteroidales	Bacteroidaceae	Bacteroides	Bacteroides_ovatus
ASV169	92	0	0	136	0	0	12	0	0	51	0	0	0	0	0	0	81	0	9	0	0	0	0	28	0	0	21	0	40	16	119	16	0	95	0	60	0	27	0	0	803	Bacteria{superkingdom}(100);Firmicutes{phylum}(100);Clostridia{class}(100);Clostridiales{order}(100);Ruminococcaceae{family}(100);Butyricicoccus{genus}(100);Unassigned{species}(0)	Bacteria	Firmicutes	Clostridia	Clostridiales	Ruminococcaceae	Butyricicoccus	Unassigned
ASV170	88	121	0	0	35	0	841	0	0	0	0	0	0	0	0	0	73	0	0	0	128	90	0	0	125	0	451	37	0	0	0	0	111	0	0	0	0	53	0	0	2153	Bacteria{superkingdom}(95);Firmicutes{phylum}(95);Clostridia{class}(95);Clostridiales{order}(95);Lachnospiraceae{family}(95);Lachnospiracea_incertae_sedis{genus}(95);uncultured_Eubacteriaceae_bacterium{species}(95)	Bacteria	Firmicutes	Clostridia	Clostridiales	Lachnospiraceae	Lachnospiracea_incertae_sedis	uncultured_Eubacteriaceae_bacterium
ASV171	0	186	0	0	0	0	0	0	0	26	0	0	0	0	35	0	0	0	0	0	83	0	0	0	0	0	5	0	0	16	0	0	0	0	0	0	0	0	0	0	351	Bacteria{superkingdom}(100);Firmicutes{phylum}(100);Bacilli{class}(100);Lactobacillales{order}(100);Lactobacillaceae{family}(100);Lactobacillus{genus}(100);Unassigned{species}(0)	Bacteria	Firmicutes	Bacilli	Lactobacillales	Lactobacillaceae	Lactobacillus	Unassigned
ASV172	0	0	0	0	0	0	0	0	0	0	0	0	0	0	0	0	0	0	0	0	0	266	0	0	0	0	0	0	0	0	0	0	0	0	0	0	0	0	0	0	266	Bacteria{superkingdom}(100);Bacteroidetes{phylum}(100);Bacteroidia{class}(100);Bacteroidales{order}(100);Porphyromonadaceae{family}(100);{genus}(100);uncultured_Firmicutes_bacterium{species}(100)	Bacteria	Bacteroidetes	Bacteroidia	Bacteroidales	Porphyromonadaceae		uncultured_Firmicutes_bacterium
ASV174	0	0	0	0	0	0	0	0	0	0	0	0	0	0	0	0	4	0	0	0	0	0	0	0	0	0	0	0	0	0	0	0	0	0	0	0	0	0	0	0	4	Bacteria{superkingdom}(100);Firmicutes{phylum}(100);Negativicutes{class}(100);Selenomonadales{order}(100);Acidaminococcaceae{family}(100);Phascolarctobacterium{genus}(100);Unassigned{species}(0)	Bacteria	Firmicutes	Negativicutes	Selenomonadales	Acidaminococcaceae	Phascolarctobacterium	Unassigned
ASV175	286	63	1	14	163	7	3	43	0	11	36	60	2	6	84	0	10	5	300	0	42	11	11	0	47	10	0	0	0	79	51	11	11	51	24	11	0	15	0	30	1498	Bacteria{superkingdom}(100);Firmicutes{phylum}(100);Clostridia{class}(100);Clostridiales{order}(100);Lachnospiraceae{family}(100);{genus}(100);Unassigned{species}(0)	Bacteria	Firmicutes	Clostridia	Clostridiales	Lachnospiraceae		Unassigned
ASV176	0	0	0	0	0	56	0	0	0	0	0	0	0	0	4	0	0	0	0	0	0	0	0	0	0	33	0	0	0	0	0	0	0	0	0	0	0	0	0	0	93	Bacteria{superkingdom}(100);Bacteroidetes{phylum}(100);Bacteroidia{class}(100);Bacteroidales{order}(100);Prevotellaceae{family}(100);Prevotella{genus}(100);Unassigned{species}(0)	Bacteria	Bacteroidetes	Bacteroidia	Bacteroidales	Prevotellaceae	Prevotella	Unassigned
ASV177	0	0	64	2	0	3	0	0	0	9	3	0	0	1	0	0	0	20	3	0	0	6	0	3	2	4	0	0	0	4	45	0	2	46	76	0	1	0	0	0	294	Bacteria{superkingdom}(100);Firmicutes{phylum}(100);Clostridia{class}(100);Clostridiales{order}(100);Lachnospiraceae{family}(100);Unassigned{genus}(0);Unassigned{species}(0)	Bacteria	Firmicutes	Clostridia	Clostridiales	Lachnospiraceae	Unassigned	Unassigned
ASV178	0	0	0	0	0	0	0	0	0	0	0	0	0	117	0	0	0	0	0	0	0	0	0	0	0	0	0	0	104	0	0	0	10	407	23	0	0	0	0	0	661	Bacteria{superkingdom}(100);Bacteroidetes{phylum}(100);Bacteroidia{class}(100);Bacteroidales{order}(100);Bacteroidaceae{family}(100);Bacteroides{genus}(100);Unassigned{species}(0)	Bacteria	Bacteroidetes	Bacteroidia	Bacteroidales	Bacteroidaceae	Bacteroides	Unassigned
ASV179	0	7	0	0	0	0	0	0	0	0	0	73	0	202	0	0	0	10	120	290	13	0	0	0	0	0	82	56	38	0	29	48	23	0	0	132	18	66	16	207	1430	Bacteria{superkingdom}(96);Firmicutes{phylum}(96);Clostridia{class}(96);Clostridiales{order}(96);Lachnospiraceae{family}(96);{genus}(96);Unassigned{species}(0)	Bacteria	Firmicutes	Clostridia	Clostridiales	Lachnospiraceae		Unassigned
ASV180	0	0	0	37	0	0	132	0	0	11	8	2	0	0	0	0	239	114	0	0	0	49	0	239	0	0	374	0	0	5	160	0	0	0	0	0	0	53	0	0	1423	Bacteria{superkingdom}(100);Firmicutes{phylum}(100);Clostridia{class}(100);Clostridiales{order}(100);Unassigned{family}(0);Unassigned{genus}(0);Unassigned{species}(0)	Bacteria	Firmicutes	Clostridia	Clostridiales	Unassigned	Unassigned	Unassigned
ASV181	0	0	0	0	0	0	0	0	0	0	0	32	0	0	0	0	0	87	0	0	0	0	0	0	0	0	0	0	0	0	0	287	0	0	0	0	804	0	0	0	1210	Bacteria{superkingdom}(91);Bacteroidetes{phylum}(91);Bacteroidia{class}(91);Bacteroidales{order}(91);Bacteroidaceae{family}(91);Bacteroides{genus}(91);Bacteroides_stercoris{species}(91)	Bacteria	Bacteroidetes	Bacteroidia	Bacteroidales	Bacteroidaceae	Bacteroides	Bacteroides_stercoris
ASV182	0	0	0	0	241	51	0	225	106	86	101	0	0	171	135	0	0	0	0	118	0	0	0	0	435	49	0	143	37	54	0	0	0	0	200	0	0	0	0	209	2361	Bacteria{superkingdom}(100);Firmicutes{phylum}(100);Clostridia{class}(100);Clostridiales{order}(100);Lachnospiraceae{family}(100);Blautia{genus}(100);Unassigned{species}(0)	Bacteria	Firmicutes	Clostridia	Clostridiales	Lachnospiraceae	Blautia	Unassigned
ASV183	31	0	0	0	0	0	0	224	0	0	0	0	0	38	0	0	0	0	0	0	0	0	0	0	0	0	43	161	0	0	0	0	0	0	14	0	27	0	0	0	538	Bacteria{superkingdom}(100);Firmicutes{phylum}(100);Clostridia{class}(100);Clostridiales{order}(100);Lachnospiraceae{family}(100);Anaerostipes{genus}(100);Unassigned{species}(0)	Bacteria	Firmicutes	Clostridia	Clostridiales	Lachnospiraceae	Anaerostipes	Unassigned
ASV184	0	0	0	0	0	0	0	0	0	0	0	0	0	0	0	0	0	0	0	0	0	0	0	0	0	0	0	0	0	0	0	0	408	0	0	0	0	0	0	0	408	Bacteria{superkingdom}(94);Bacteroidetes{phylum}(94);Bacteroidia{class}(94);Bacteroidales{order}(94);Prevotellaceae{family}(94);Paraprevotella{genus}(94);uncultured_organism{species}(94)	Bacteria	Bacteroidetes	Bacteroidia	Bacteroidales	Prevotellaceae	Paraprevotella	uncultured_organism
ASV187	0	0	0	0	0	0	0	0	0	0	0	0	0	0	0	0	0	0	76	0	0	0	0	0	0	0	0	0	0	0	0	0	0	0	0	0	0	0	0	0	76	Bacteria{superkingdom}(97);Firmicutes{phylum}(97);Clostridia{class}(97);Clostridiales{order}(97);Ruminococcaceae{family}(97);Clostridium_IV{genus}(97);uncultured_Bacteroidetes_bacterium{species}(97)	Bacteria	Firmicutes	Clostridia	Clostridiales	Ruminococcaceae	Clostridium_IV	uncultured_Bacteroidetes_bacterium
ASV188	0	0	55	89	40	9	0	578	9	0	14	0	0	51	0	67	227	0	0	0	0	7	13	18	36	0	0	0	0	0	0	0	18	0	14	0	24	86	0	0	1355	Bacteria{superkingdom}(98);Proteobacteria{phylum}(98);Gammaproteobacteria{class}(98);Enterobacteriales{order}(98);Enterobacteriaceae{family}(98);Klebsiella{genus}(98);Unassigned{species}(0)	Bacteria	Proteobacteria	Gammaproteobacteria	Enterobacteriales	Enterobacteriaceae	Klebsiella	Unassigned
ASV189	163	0	0	39	509	979	90	0	0	0	126	0	0	0	0	57	0	0	191	0	0	0	0	0	182	419	109	0	0	0	37	0	39	0	0	0	23	0	0	0	2963	Bacteria{superkingdom}(100);Firmicutes{phylum}(100);Clostridia{class}(100);Clostridiales{order}(100);Lachnospiraceae{family}(100);Unassigned{genus}(0);Unassigned{species}(0)	Bacteria	Firmicutes	Clostridia	Clostridiales	Lachnospiraceae	Unassigned	Unassigned
ASV190	12	113	138	8	6	0	0	52	0	0	0	0	3	108	0	40	0	7	26	5	42	33	14	4	0	11	19	16	0	0	28	21	0	32	10	0	0	304	64	0	1116	Bacteria{superkingdom}(100);Firmicutes{phylum}(100);Clostridia{class}(100);Clostridiales{order}(100);Lachnospiraceae{family}(100);Lachnospiracea_incertae_sedis{genus}(100);Unassigned{species}(0)	Bacteria	Firmicutes	Clostridia	Clostridiales	Lachnospiraceae	Lachnospiracea_incertae_sedis	Unassigned
ASV194	0	0	0	0	0	0	1232	0	0	0	0	0	0	0	0	0	0	63	0	0	0	0	25	0	0	0	1178	0	0	0	0	0	0	0	0	0	0	0	0	0	2498	Bacteria{superkingdom}(82);Firmicutes{phylum}(82);Erysipelotrichia{class}(82);Erysipelotrichales{order}(82);Erysipelotrichaceae{family}(82);Clostridium_XVIII{genus}(82);uncultured_Erysipelotrichaceae_bacterium{species}(82)	Bacteria	Firmicutes	Erysipelotrichia	Erysipelotrichales	Erysipelotrichaceae	Clostridium_XVIII	uncultured_Erysipelotrichaceae_bacterium
ASV196	0	0	0	0	0	0	1	0	0	0	0	0	0	0	0	0	0	0	0	0	0	0	0	0	0	0	2	0	0	0	0	0	0	0	0	0	0	0	0	0	3	Bacteria{superkingdom}(100);Bacteroidetes{phylum}(100);Bacteroidia{class}(100);Bacteroidales{order}(100);Prevotellaceae{family}(100);Prevotella{genus}(100);Unassigned{species}(0)	Bacteria	Bacteroidetes	Bacteroidia	Bacteroidales	Prevotellaceae	Prevotella	Unassigned
ASV197	0	0	17	30	41	0	10	441	110	0	0	20	0	0	0	101	66	122	44	0	0	8	18	274	35	0	9	277	40	0	0	24	97	23	0	0	50	7	0	0	1864	Bacteria{superkingdom}(99);Firmicutes{phylum}(99);Clostridia{class}(99);Clostridiales{order}(99);Lachnospiraceae{family}(99);Dorea{genus}(99);Unassigned{species}(0)	Bacteria	Firmicutes	Clostridia	Clostridiales	Lachnospiraceae	Dorea	Unassigned
ASV199	0	0	0	0	0	0	0	0	0	0	0	0	0	0	0	48	0	0	0	0	0	0	0	0	0	0	0	0	19	0	0	0	0	234	0	0	75	0	0	0	376	Bacteria{superkingdom}(100);Firmicutes{phylum}(100);Clostridia{class}(100);Clostridiales{order}(100);Ruminococcaceae{family}(100);Faecalibacterium{genus}(100);Unassigned{species}(0)	Bacteria	Firmicutes	Clostridia	Clostridiales	Ruminococcaceae	Faecalibacterium	Unassigned
ASV200	0	0	131	54	84	0	0	6	0	13	22	0	0	71	0	35	481	0	0	0	0	9	10	7	8	0	0	0	0	10	0	0	0	0	0	10	11	165	0	0	1127	Bacteria{superkingdom}(98);Proteobacteria{phylum}(98);Gammaproteobacteria{class}(98);Enterobacteriales{order}(98);Enterobacteriaceae{family}(98);Klebsiella{genus}(98);Unassigned{species}(0)	Bacteria	Proteobacteria	Gammaproteobacteria	Enterobacteriales	Enterobacteriaceae	Klebsiella	Unassigned
ASV201	0	0	0	31	0	22	0	0	16	24	0	0	0	0	64	0	44	31	25	0	0	0	0	26	0	26	137	0	76	41	0	0	19	843	0	56	33	33	0	0	1547	Bacteria{superkingdom}(100);Firmicutes{phylum}(100);Clostridia{class}(100);Clostridiales{order}(100);Lachnospiraceae{family}(100);Unassigned{genus}(0);Unassigned{species}(0)	Bacteria	Firmicutes	Clostridia	Clostridiales	Lachnospiraceae	Unassigned	Unassigned
ASV202	0	0	0	0	0	0	0	0	0	0	0	0	61	0	0	0	0	0	0	0	0	0	0	0	0	0	0	0	0	0	0	0	0	0	0	0	0	0	0	0	61	Bacteria{superkingdom}(100);Firmicutes{phylum}(100);Negativicutes{class}(100);Selenomonadales{order}(100);Veillonellaceae{family}(100);Veillonella{genus}(100);Unassigned{species}(0)	Bacteria	Firmicutes	Negativicutes	Selenomonadales	Veillonellaceae	Veillonella	Unassigned
ASV204	0	0	0	0	0	0	38	0	0	0	0	94	0	0	0	0	113	0	158	0	0	0	0	0	0	0	162	0	0	0	0	106	0	113	0	118	0	31	0	0	933	Bacteria{superkingdom}(100);Firmicutes{phylum}(100);Clostridia{class}(100);Clostridiales{order}(100);Ruminococcaceae{family}(100);Unassigned{genus}(0);Unassigned{species}(0)	Bacteria	Firmicutes	Clostridia	Clostridiales	Ruminococcaceae	Unassigned	Unassigned
ASV205	0	0	0	0	2	25	0	0	0	26	0	182	0	0	49	0	0	78	0	1150	0	52	0	0	0	0	0	0	60	405	6	141	13	251	0	0	29	34	0	1031	3534	Bacteria{superkingdom}(100);Firmicutes{phylum}(100);Clostridia{class}(100);Clostridiales{order}(100);Ruminococcaceae{family}(100);Ruminococcus{genus}(100);Unassigned{species}(0)	Bacteria	Firmicutes	Clostridia	Clostridiales	Ruminococcaceae	Ruminococcus	Unassigned
ASV206	0	0	0	0	0	0	0	0	0	0	0	0	0	0	0	7	0	0	0	0	0	1421	4	0	0	0	0	0	0	0	0	0	0	0	0	0	0	0	0	0	1432	Bacteria{superkingdom}(98);Firmicutes{phylum}(98);Clostridia{class}(98);Clostridiales{order}(98);Ruminococcaceae{family}(98);Anaerobacterium{genus}(98);Unassigned{species}(0)	Bacteria	Firmicutes	Clostridia	Clostridiales	Ruminococcaceae	Anaerobacterium	Unassigned
ASV207	0	0	0	0	73	0	0	0	232	0	0	0	35	0	0	1458	0	0	0	0	0	72	0	0	0	0	0	0	0	0	0	0	0	0	0	0	0	0	95	0	1965	Bacteria{superkingdom}(100);Proteobacteria{phylum}(100);Gammaproteobacteria{class}(100);Pasteurellales{order}(100);Pasteurellaceae{family}(100);Haemophilus{genus}(100);Unassigned{species}(0)	Bacteria	Proteobacteria	Gammaproteobacteria	Pasteurellales	Pasteurellaceae	Haemophilus	Unassigned
ASV208	0	0	0	3	0	175	0	0	0	0	0	0	0	0	0	0	10	0	12	0	0	0	0	0	0	49	0	0	0	0	0	0	0	0	0	0	0	1	2	0	252	Bacteria{superkingdom}(100);Bacteroidetes{phylum}(100);Bacteroidia{class}(100);Bacteroidales{order}(100);Prevotellaceae{family}(100);Prevotella{genus}(100);Unassigned{species}(0)	Bacteria	Bacteroidetes	Bacteroidia	Bacteroidales	Prevotellaceae	Prevotella	Unassigned
ASV209	0	236	0	406	0	0	0	0	21	0	0	0	0	0	0	10	0	0	0	207	124	275	0	0	0	0	0	0	29	0	25	0	0	0	0	0	17	0	0	63	1413	Bacteria{superkingdom}(100);Proteobacteria{phylum}(100);Betaproteobacteria{class}(100);Burkholderiales{order}(100);Sutterellaceae{family}(100);Parasutterella{genus}(100);Unassigned{species}(0)	Bacteria	Proteobacteria	Betaproteobacteria	Burkholderiales	Sutterellaceae	Parasutterella	Unassigned
ASV210	0	0	0	0	0	43	0	0	0	0	0	0	0	0	0	0	0	10	245	0	0	0	0	0	0	17	8	0	0	5	0	0	78	4	125	0	5	0	0	0	540	Bacteria{superkingdom}(98);Firmicutes{phylum}(98);Clostridia{class}(98);Clostridiales{order}(98);Lachnospiraceae{family}(98);{genus}(98);Unassigned{species}(0)	Bacteria	Firmicutes	Clostridia	Clostridiales	Lachnospiraceae		Unassigned
ASV211	0	0	0	0	0	17	8	0	0	0	0	0	0	318	0	0	0	0	0	1254	0	0	0	0	0	10	304	379	0	0	47	0	0	0	0	0	0	0	0	352	2689	Bacteria{superkingdom}(100);Bacteroidetes{phylum}(100);Bacteroidia{class}(100);Bacteroidales{order}(100);Bacteroidaceae{family}(100);Bacteroides{genus}(100);Bacteroides_eggerthii{species}(100)	Bacteria	Bacteroidetes	Bacteroidia	Bacteroidales	Bacteroidaceae	Bacteroides	Bacteroides_eggerthii
ASV212	0	195	0	0	0	0	9	0	0	8	0	0	0	0	0	0	0	0	0	0	164	0	0	24	23	0	94	0	0	78	0	0	0	41	0	543	0	0	0	0	1179	Bacteria{superkingdom}(95);Bacteroidetes{phylum}(95);Bacteroidia{class}(95);Bacteroidales{order}(95);Porphyromonadaceae{family}(95);Parabacteroides{genus}(95);Parabacteroides_distasonis{species}(95)	Bacteria	Bacteroidetes	Bacteroidia	Bacteroidales	Porphyromonadaceae	Parabacteroides	Parabacteroides_distasonis
ASV213	0	0	0	0	0	0	53	0	0	0	0	0	0	0	0	0	172	0	41	0	0	0	0	0	0	0	44	0	0	0	4	0	0	0	0	69	0	189	0	0	572	Bacteria{superkingdom}(100);Bacteroidetes{phylum}(100);Bacteroidia{class}(100);Bacteroidales{order}(100);Prevotellaceae{family}(100);Prevotella{genus}(100);Unassigned{species}(0)	Bacteria	Bacteroidetes	Bacteroidia	Bacteroidales	Prevotellaceae	Prevotella	Unassigned
ASV214	0	0	0	3	0	0	0	0	0	0	0	0	0	0	0	0	0	0	0	0	0	0	0	0	0	0	0	0	0	0	0	0	0	0	0	0	0	0	0	0	3	Bacteria{superkingdom}(100);Bacteroidetes{phylum}(100);Bacteroidia{class}(100);Bacteroidales{order}(100);Prevotellaceae{family}(100);Alloprevotella{genus}(100);Unassigned{species}(0)	Bacteria	Bacteroidetes	Bacteroidia	Bacteroidales	Prevotellaceae	Alloprevotella	Unassigned
ASV215	0	0	0	0	0	66	46	0	0	0	0	291	0	69	0	0	25	55	68	190	0	9	0	0	31	39	233	0	116	0	0	373	48	0	0	0	83	138	0	88	1968	Bacteria{superkingdom}(83);Bacteroidetes{phylum}(83);Bacteroidia{class}(83);Bacteroidales{order}(83);Rikenellaceae{family}(83);Alistipes{genus}(83);Alistipes_shahii{species}(83)	Bacteria	Bacteroidetes	Bacteroidia	Bacteroidales	Rikenellaceae	Alistipes	Alistipes_shahii
ASV216	0	0	0	0	0	75	0	0	0	38	0	0	0	0	0	0	0	0	0	0	0	0	0	0	0	143	0	0	0	310	0	0	28	0	0	494	338	0	0	0	1426	Bacteria{superkingdom}(98);Firmicutes{phylum}(98);Clostridia{class}(98);Clostridiales{order}(98);Ruminococcaceae{family}(98);Ruminococcus{genus}(98);Ruminococcus_callidus{species}(98)	Bacteria	Firmicutes	Clostridia	Clostridiales	Ruminococcaceae	Ruminococcus	Ruminococcus_callidus
ASV217	0	0	0	60	0	0	16	0	0	0	0	0	0	0	0	0	0	0	4	0	0	0	0	5	0	0	229	0	0	0	0	0	49	0	0	0	0	0	0	0	363	Bacteria{superkingdom}(100);Bacteroidetes{phylum}(100);Bacteroidia{class}(100);Bacteroidales{order}(100);Prevotellaceae{family}(100);Paraprevotella{genus}(100);uncultured_organism{species}(100)	Bacteria	Bacteroidetes	Bacteroidia	Bacteroidales	Prevotellaceae	Paraprevotella	uncultured_organism
ASV219	0	0	0	169	0	0	0	0	0	0	0	110	0	0	0	0	0	0	0	0	0	0	0	160	0	0	0	0	0	0	0	156	0	0	0	0	0	0	129	0	724	Bacteria{superkingdom}(82);Bacteroidetes{phylum}(82);Bacteroidia{class}(82);Bacteroidales{order}(82);Bacteroidaceae{family}(82);Bacteroides{genus}(82);Bacteroides_vulgatus{species}(82)	Bacteria	Bacteroidetes	Bacteroidia	Bacteroidales	Bacteroidaceae	Bacteroides	Bacteroides_vulgatus
ASV220	0	9	6	61	46	0	60	33	105	55	47	0	15	0	84	34	26	49	0	7	12	128	0	33	21	0	0	3	44	6	11	0	11	0	94	19	0	0	30	0	1049	Bacteria{superkingdom}(100);Firmicutes{phylum}(100);Bacilli{class}(100);Lactobacillales{order}(100);Streptococcaceae{family}(100);Streptococcus{genus}(100);Unassigned{species}(0)	Bacteria	Firmicutes	Bacilli	Lactobacillales	Streptococcaceae	Streptococcus	Unassigned
ASV221	0	0	0	0	0	0	0	0	0	0	160	0	0	0	0	0	0	0	126	0	0	0	0	0	0	0	0	0	0	0	129	0	0	153	0	0	0	0	0	0	568	Bacteria{superkingdom}(99);Proteobacteria{phylum}(99);Deltaproteobacteria{class}(99);Desulfovibrionales{order}(99);Desulfovibrionaceae{family}(99);{genus}(99);uncultured_Desulfovibrio_sp.{species}(99)	Bacteria	Proteobacteria	Deltaproteobacteria	Desulfovibrionales	Desulfovibrionaceae		uncultured_Desulfovibrio_sp.
ASV222	13	0	0	0	0	0	14	0	0	0	0	44	0	0	0	0	37	15	125	0	0	0	0	0	0	0	11	0	6	24	62	30	62	51	0	100	50	61	0	0	705	Bacteria{superkingdom}(100);Firmicutes{phylum}(100);Clostridia{class}(100);Clostridiales{order}(100);Ruminococcaceae{family}(100);Oscillibacter{genus}(100);Unassigned{species}(0)	Bacteria	Firmicutes	Clostridia	Clostridiales	Ruminococcaceae	Oscillibacter	Unassigned
ASV224	0	62	3	30	0	0	0	0	17	15	0	42	0	0	0	0	24	0	74	0	34	5	3	0	0	0	17	9	28	15	18	11	0	0	0	75	0	90	88	0	660	Bacteria{superkingdom}(100);Proteobacteria{phylum}(100);Deltaproteobacteria{class}(100);Desulfovibrionales{order}(100);Desulfovibrionaceae{family}(100);Bilophila{genus}(100);Unassigned{species}(0)	Bacteria	Proteobacteria	Deltaproteobacteria	Desulfovibrionales	Desulfovibrionaceae	Bilophila	Unassigned
ASV225	0	24	0	0	0	193	0	0	0	0	0	0	175	0	62	0	0	0	0	0	29	0	0	0	0	206	0	0	0	0	0	0	0	0	0	0	0	0	114	0	803	Bacteria{superkingdom}(100);Firmicutes{phylum}(100);Clostridia{class}(100);Clostridiales{order}(100);Lachnospiraceae{family}(100);Unassigned{genus}(0);Unassigned{species}(0)	Bacteria	Firmicutes	Clostridia	Clostridiales	Lachnospiraceae	Unassigned	Unassigned
ASV226	15	0	0	107	0	16	244	0	59	81	0	9	0	0	0	14	103	53	33	49	0	0	0	48	0	14	93	0	54	86	0	15	100	0	0	50	41	31	0	19	1334	Bacteria{superkingdom}(94);Firmicutes{phylum}(94);Clostridia{class}(94);Clostridiales{order}(94);{family}(94);{genus}(94);uncultured_Bacteroidetes_bacterium{species}(94)	Bacteria	Firmicutes	Clostridia	Clostridiales			uncultured_Bacteroidetes_bacterium
ASV227	0	0	0	0	0	0	0	0	0	0	0	0	0	168	0	0	0	0	0	0	0	0	0	0	0	0	0	0	0	0	0	0	0	0	252	0	0	0	220	0	640	Bacteria{superkingdom}(100);Firmicutes{phylum}(100);Clostridia{class}(100);Clostridiales{order}(100);Lachnospiraceae{family}(100);Unassigned{genus}(0);Unassigned{species}(0)	Bacteria	Firmicutes	Clostridia	Clostridiales	Lachnospiraceae	Unassigned	Unassigned
ASV228	0	0	0	0	0	0	32	0	0	0	0	0	0	0	0	0	54	0	1466	0	0	0	0	0	0	0	40	0	0	0	0	0	0	0	0	0	0	117	0	0	1709	Bacteria{superkingdom}(96);Bacteroidetes{phylum}(96);Bacteroidia{class}(96);Bacteroidales{order}(96);Porphyromonadaceae{family}(96);Barnesiella{genus}(96);uncultured_bacterium{species}(96)	Bacteria	Bacteroidetes	Bacteroidia	Bacteroidales	Porphyromonadaceae	Barnesiella	uncultured_bacterium
ASV229	0	0	0	0	0	0	0	0	0	0	0	165	0	0	0	0	0	152	0	0	0	0	0	0	0	0	0	0	0	0	0	39	0	0	0	0	0	0	0	0	356	Bacteria{superkingdom}(100);Firmicutes{phylum}(100);Clostridia{class}(100);Clostridiales{order}(100);Lachnospiraceae{family}(100);Dorea{genus}(100);Unassigned{species}(0)	Bacteria	Firmicutes	Clostridia	Clostridiales	Lachnospiraceae	Dorea	Unassigned
ASV230	0	0	0	0	0	0	0	0	0	281	0	0	0	0	0	0	0	8	0	0	0	0	0	0	0	0	0	0	0	1135	0	0	0	0	0	0	0	0	0	0	1424	Bacteria{superkingdom}(100);Bacteroidetes{phylum}(100);Bacteroidia{class}(100);Bacteroidales{order}(100);Rikenellaceae{family}(100);Alistipes{genus}(100);Unassigned{species}(0)	Bacteria	Bacteroidetes	Bacteroidia	Bacteroidales	Rikenellaceae	Alistipes	Unassigned
ASV231	0	55	5	0	36	135	0	26	37	0	0	0	0	0	0	0	110	0	0	0	188	0	0	0	18	58	0	41	21	35	0	0	0	255	52	53	0	338	78	0	1541	Bacteria{superkingdom}(100);Firmicutes{phylum}(100);Clostridia{class}(100);Clostridiales{order}(100);Lachnospiraceae{family}(100);Lachnospiracea_incertae_sedis{genus}(100);Unassigned{species}(0)	Bacteria	Firmicutes	Clostridia	Clostridiales	Lachnospiraceae	Lachnospiracea_incertae_sedis	Unassigned
ASV233	0	0	0	0	0	0	0	0	0	0	0	0	0	71	0	0	0	0	0	0	0	0	0	0	0	0	0	0	147	0	37	0	37	120	31	76	0	0	0	0	519	Bacteria{superkingdom}(90);Bacteroidetes{phylum}(90);Bacteroidia{class}(90);Bacteroidales{order}(90);Rikenellaceae{family}(90);Alistipes{genus}(90);Alistipes_shahii{species}(90)	Bacteria	Bacteroidetes	Bacteroidia	Bacteroidales	Rikenellaceae	Alistipes	Alistipes_shahii
ASV234	0	22	0	15	23	0	0	0	0	44	0	0	26	0	0	0	0	0	0	0	53	0	0	17	10	0	0	0	0	8	0	0	0	0	0	0	0	0	6	0	224	Bacteria{superkingdom}(100);Firmicutes{phylum}(100);Bacilli{class}(100);Lactobacillales{order}(100);Streptococcaceae{family}(100);Streptococcus{genus}(100);Unassigned{species}(0)	Bacteria	Firmicutes	Bacilli	Lactobacillales	Streptococcaceae	Streptococcus	Unassigned
ASV235	0	0	0	0	0	25	0	0	0	3	0	0	0	0	0	0	61	90	10	0	278	15	0	0	0	87	0	0	0	45	0	1	27	0	0	0	19	48	0	0	709	Bacteria{superkingdom}(82);Firmicutes{phylum}(82);Clostridia{class}(82);Clostridiales{order}(82);Ruminococcaceae{family}(82);Ruminococcus{genus}(82);uncultured_bacterium{species}(82)	Bacteria	Firmicutes	Clostridia	Clostridiales	Ruminococcaceae	Ruminococcus	uncultured_bacterium
ASV236	20	42	0	18	146	0	0	0	52	69	100	135	14	0	0	0	0	0	0	22	73	0	0	78	208	0	0	30	7	73	59	128	0	0	43	8	0	0	19	17	1361	Bacteria{superkingdom}(100);Firmicutes{phylum}(100);Clostridia{class}(100);Clostridiales{order}(100);Lachnospiraceae{family}(100);Anaerostipes{genus}(100);Unassigned{species}(0)	Bacteria	Firmicutes	Clostridia	Clostridiales	Lachnospiraceae	Anaerostipes	Unassigned
ASV237	0	3	4	354	9	0	0	4	10	14	1174	10	117	517	43	10	0	75	0	0	0	0	7	0	0	4	0	0	9	17	0	0	2	0	0	0	19	0	0	0	2402	Bacteria{superkingdom}(100);Firmicutes{phylum}(100);Bacilli{class}(100);Lactobacillales{order}(100);Leuconostocaceae{family}(100);Weissella{genus}(100);Unassigned{species}(0)	Bacteria	Firmicutes	Bacilli	Lactobacillales	Leuconostocaceae	Weissella	Unassigned
ASV238	0	0	0	0	0	0	0	0	0	0	0	0	0	0	0	0	2294	0	0	0	0	0	0	0	0	0	0	0	0	0	0	0	0	0	0	0	0	732	0	0	3026	Bacteria{superkingdom}(95);Firmicutes{phylum}(95);Clostridia{class}(95);Clostridiales{order}(95);Lachnospiraceae{family}(95);Lachnospiracea_incertae_sedis{genus}(95);Unassigned{species}(0)	Bacteria	Firmicutes	Clostridia	Clostridiales	Lachnospiraceae	Lachnospiracea_incertae_sedis	Unassigned
ASV239	0	19	0	0	0	0	0	2	0	0	0	0	0	0	0	0	0	0	0	0	0	0	0	0	2	0	0	0	0	0	0	0	0	0	0	0	0	0	0	0	23	Bacteria{superkingdom}(100);Firmicutes{phylum}(100);Bacilli{class}(100);Lactobacillales{order}(100);Lactobacillaceae{family}(100);Lactobacillus{genus}(100);Unassigned{species}(0)	Bacteria	Firmicutes	Bacilli	Lactobacillales	Lactobacillaceae	Lactobacillus	Unassigned
ASV240	0	0	0	0	0	0	1	0	0	0	0	0	0	0	0	0	0	0	0	0	0	0	0	0	0	0	0	0	0	0	0	0	0	0	0	120	0	0	0	0	121	Bacteria{superkingdom}(100);Bacteroidetes{phylum}(100);Bacteroidia{class}(100);Bacteroidales{order}(100);Prevotellaceae{family}(100);Prevotella{genus}(100);Unassigned{species}(0)	Bacteria	Bacteroidetes	Bacteroidia	Bacteroidales	Prevotellaceae	Prevotella	Unassigned
ASV241	47	0	0	0	22	255	0	0	0	101	0	0	0	0	0	0	67	0	0	0	0	101	0	50	16	479	0	0	0	28	0	0	113	40	0	39	0	0	0	0	1358	Bacteria{superkingdom}(100);Firmicutes{phylum}(100);Clostridia{class}(100);Clostridiales{order}(100);Lachnospiraceae{family}(100);Blautia{genus}(100);Unassigned{species}(0)	Bacteria	Firmicutes	Clostridia	Clostridiales	Lachnospiraceae	Blautia	Unassigned
ASV244	0	0	0	0	0	0	0	0	0	0	0	0	0	0	0	0	0	0	0	0	0	132	0	0	0	0	0	0	0	0	0	0	0	0	0	0	0	0	0	0	132	Bacteria{superkingdom}(100);Bacteroidetes{phylum}(100);Bacteroidia{class}(100);Bacteroidales{order}(100);Prevotellaceae{family}(100);{genus}(100);uncultured_organism{species}(100)	Bacteria	Bacteroidetes	Bacteroidia	Bacteroidales	Prevotellaceae		uncultured_organism
ASV245	0	0	89	27	55	0	0	270	22	22	20	0	0	25	17	58	240	0	0	0	0	0	0	6	0	0	0	0	0	0	0	0	0	0	0	11	15	104	0	0	981	Bacteria{superkingdom}(87);Proteobacteria{phylum}(87);Gammaproteobacteria{class}(87);Enterobacteriales{order}(87);Enterobacteriaceae{family}(87);Klebsiella{genus}(87);Unassigned{species}(0)	Bacteria	Proteobacteria	Gammaproteobacteria	Enterobacteriales	Enterobacteriaceae	Klebsiella	Unassigned
ASV246	0	0	0	0	0	17	0	0	0	0	0	0	0	0	0	0	0	0	0	0	0	0	0	0	0	97	0	0	0	0	0	0	504	0	0	0	0	0	0	0	618	Bacteria{superkingdom}(100);Firmicutes{phylum}(100);{class}(100);{order}(100);{family}(100);{genus}(100);Unassigned{species}(0)	Bacteria	Firmicutes					Unassigned
ASV247	0	0	0	0	0	0	0	0	0	0	25	0	0	0	0	0	0	0	0	0	0	0	0	0	0	0	0	0	0	0	2689	0	0	0	0	0	0	0	0	0	2714	Bacteria{superkingdom}(86);Bacteroidetes{phylum}(86);Bacteroidia{class}(86);Bacteroidales{order}(86);Bacteroidaceae{family}(86);Bacteroides{genus}(86);Bacteroides_plebeius{species}(86)	Bacteria	Bacteroidetes	Bacteroidia	Bacteroidales	Bacteroidaceae	Bacteroides	Bacteroides_plebeius
ASV248	0	0	0	2	1	0	0	0	0	0	0	55	0	0	0	0	8	0	50	0	0	0	0	0	0	0	47	0	0	0	0	13	0	0	0	81	11	16	0	0	284	Bacteria{superkingdom}(93);Firmicutes{phylum}(93);Clostridia{class}(93);Clostridiales{order}(93);Ruminococcaceae{family}(93);{genus}(93);uncultured_bacterium_adhufec101{species}(93)	Bacteria	Firmicutes	Clostridia	Clostridiales	Ruminococcaceae		uncultured_bacterium_adhufec101
ASV250	214	0	0	27	8	0	0	0	0	65	0	0	0	0	0	0	0	0	40	99	0	0	0	0	63	0	0	609	0	221	282	0	9	0	0	228	0	0	0	35	1900	Bacteria{superkingdom}(92);Bacteroidetes{phylum}(92);Bacteroidia{class}(92);Bacteroidales{order}(92);Bacteroidaceae{family}(92);Bacteroides{genus}(92);Bacteroides_ovatus{species}(92)	Bacteria	Bacteroidetes	Bacteroidia	Bacteroidales	Bacteroidaceae	Bacteroides	Bacteroides_ovatus
ASV251	0	7	74	0	0	0	0	28	0	45	0	0	0	11	0	0	0	0	0	0	0	0	396	0	0	0	0	4	2	15	0	0	0	22	0	0	15	0	0	0	619	Bacteria{superkingdom}(100);Firmicutes{phylum}(100);Negativicutes{class}(100);Selenomonadales{order}(100);Veillonellaceae{family}(100);Veillonella{genus}(100);Unassigned{species}(0)	Bacteria	Firmicutes	Negativicutes	Selenomonadales	Veillonellaceae	Veillonella	Unassigned
ASV252	0	0	0	0	0	0	16	0	34	218	10	8	0	0	0	3	35	41	22	0	0	8	0	0	0	0	34	0	74	269	26	7	15	144	0	23	0	13	0	0	1000	Bacteria{superkingdom}(100);Firmicutes{phylum}(100);Clostridia{class}(100);Clostridiales{order}(100);Ruminococcaceae{family}(100);Clostridium_IV{genus}(100);Unassigned{species}(0)	Bacteria	Firmicutes	Clostridia	Clostridiales	Ruminococcaceae	Clostridium_IV	Unassigned
ASV253	10	0	44	0	73	0	0	0	0	0	0	0	0	0	7	0	0	0	0	64	0	0	231	0	89	0	0	0	0	0	0	0	0	0	0	0	0	0	9	15	542	Bacteria{superkingdom}(100);Proteobacteria{phylum}(100);Betaproteobacteria{class}(100);Burkholderiales{order}(100);Sutterellaceae{family}(100);Parasutterella{genus}(100);Unassigned{species}(0)	Bacteria	Proteobacteria	Betaproteobacteria	Burkholderiales	Sutterellaceae	Parasutterella	Unassigned
ASV254	0	0	0	0	0	0	199	0	188	0	0	0	0	0	208	0	0	0	0	0	0	0	0	51	0	0	110	0	67	0	0	0	0	0	0	39	0	0	0	0	862	Bacteria{superkingdom}(100);Firmicutes{phylum}(100);Clostridia{class}(100);Clostridiales{order}(100);Lachnospiraceae{family}(100);Blautia{genus}(100);Unassigned{species}(0)	Bacteria	Firmicutes	Clostridia	Clostridiales	Lachnospiraceae	Blautia	Unassigned
ASV255	0	0	89	81	0	93	334	0	0	0	0	0	0	0	80	0	0	0	0	0	0	31	0	54	0	234	136	0	0	0	0	0	0	0	0	0	0	0	0	0	1132	Bacteria{superkingdom}(100);Firmicutes{phylum}(100);Clostridia{class}(100);Clostridiales{order}(100);Ruminococcaceae{family}(100);Butyricicoccus{genus}(100);Unassigned{species}(0)	Bacteria	Firmicutes	Clostridia	Clostridiales	Ruminococcaceae	Butyricicoccus	Unassigned
ASV256	0	0	0	0	0	0	0	0	0	0	0	0	0	0	0	0	0	0	417	0	0	0	0	0	0	0	0	0	0	0	0	0	0	0	0	0	0	0	0	0	417	Bacteria{superkingdom}(100);Firmicutes{phylum}(100);Clostridia{class}(100);Clostridiales{order}(100);Ruminococcaceae{family}(100);Anaerobacterium{genus}(100);uncultured_bacterium{species}(100)	Bacteria	Firmicutes	Clostridia	Clostridiales	Ruminococcaceae	Anaerobacterium	uncultured_bacterium
ASV257	0	0	0	0	0	157	0	0	0	0	0	0	0	0	0	0	2	0	7	0	0	0	0	0	0	39	0	0	0	0	0	0	0	0	0	0	0	6	0	0	211	Bacteria{superkingdom}(90);Bacteroidetes{phylum}(90);Bacteroidia{class}(90);Bacteroidales{order}(90);Porphyromonadaceae{family}(90);Barnesiella{genus}(90);uncultured_organism{species}(90)	Bacteria	Bacteroidetes	Bacteroidia	Bacteroidales	Porphyromonadaceae	Barnesiella	uncultured_organism
ASV259	0	0	0	0	0	0	0	10	0	0	0	0	0	0	0	0	0	22	0	400	0	39	0	0	0	0	22	191	55	0	0	0	0	0	0	0	0	0	0	52	791	Bacteria{superkingdom}(83);Bacteroidetes{phylum}(83);Bacteroidia{class}(83);Bacteroidales{order}(83);Porphyromonadaceae{family}(83);Parabacteroides{genus}(83);Parabacteroides_distasonis_ATCC_8503{species}(83)	Bacteria	Bacteroidetes	Bacteroidia	Bacteroidales	Porphyromonadaceae	Parabacteroides	Parabacteroides_distasonis_ATCC_8503
ASV260	0	0	0	0	0	0	6	0	0	0	0	0	0	18	0	0	6	0	6	0	0	0	0	19	0	0	115	0	3	0	0	0	0	0	6	0	5	7	0	0	191	Bacteria{superkingdom}(90);Bacteroidetes{phylum}(90);Bacteroidia{class}(90);Bacteroidales{order}(90);Rikenellaceae{family}(90);Alistipes{genus}(90);Alistipes_indistinctus{species}(90)	Bacteria	Bacteroidetes	Bacteroidia	Bacteroidales	Rikenellaceae	Alistipes	Alistipes_indistinctus
ASV261	0	349	0	0	2	0	0	0	0	0	0	742	0	0	0	0	0	0	0	0	404	145	0	0	2	0	0	0	0	0	0	217	0	0	0	0	0	0	0	0	1861	Bacteria{superkingdom}(99);Proteobacteria{phylum}(99);Deltaproteobacteria{class}(99);Desulfovibrionales{order}(99);Desulfovibrionaceae{family}(99);Desulfovibrio{genus}(99);Unassigned{species}(0)	Bacteria	Proteobacteria	Deltaproteobacteria	Desulfovibrionales	Desulfovibrionaceae	Desulfovibrio	Unassigned
ASV262	0	0	0	0	0	0	0	0	0	0	0	0	0	0	0	0	0	0	0	0	0	0	0	0	0	0	0	0	0	0	0	0	0	0	0	0	0	0	125	0	125	Bacteria{superkingdom}(100);Firmicutes{phylum}(100);Bacilli{class}(100);Lactobacillales{order}(100);Streptococcaceae{family}(100);Streptococcus{genus}(100);Unassigned{species}(0)	Bacteria	Firmicutes	Bacilli	Lactobacillales	Streptococcaceae	Streptococcus	Unassigned
ASV263	0	0	10	0	0	0	222	0	0	0	0	0	0	0	0	0	0	74	0	0	0	0	83	0	0	0	222	0	0	0	0	0	0	0	0	0	0	0	0	0	611	Bacteria{superkingdom}(89);Firmicutes{phylum}(89);Erysipelotrichia{class}(89);Erysipelotrichales{order}(89);Erysipelotrichaceae{family}(89);Clostridium_XVIII{genus}(89);uncultured_Erysipelotrichaceae_bacterium{species}(89)	Bacteria	Firmicutes	Erysipelotrichia	Erysipelotrichales	Erysipelotrichaceae	Clostridium_XVIII	uncultured_Erysipelotrichaceae_bacterium
ASV264	0	0	0	0	0	0	0	0	0	0	0	588	0	0	0	0	0	0	0	0	0	0	0	0	0	0	0	0	0	0	0	389	0	0	0	0	0	0	0	0	977	Bacteria{superkingdom}(90);Bacteroidetes{phylum}(90);Bacteroidia{class}(90);Bacteroidales{order}(90);Porphyromonadaceae{family}(90);Barnesiella{genus}(90);uncultured_organism{species}(90)	Bacteria	Bacteroidetes	Bacteroidia	Bacteroidales	Porphyromonadaceae	Barnesiella	uncultured_organism
ASV265	0	0	0	9	0	0	85	0	0	48	19	56	0	33	0	0	0	289	11	0	0	0	0	80	19	0	88	0	0	197	61	89	0	19	99	78	102	0	0	0	1382	Bacteria{superkingdom}(100);Actinobacteria{phylum}(100);Actinobacteria{class}(100);Coriobacteriales{order}(100);Coriobacteriaceae{family}(100);Unassigned{genus}(0);Unassigned{species}(0)	Bacteria	Actinobacteria	Actinobacteria	Coriobacteriales	Coriobacteriaceae	Unassigned	Unassigned
ASV266	0	0	0	0	0	0	0	0	0	0	0	0	0	0	0	629	0	0	0	0	0	0	0	0	0	0	0	0	0	0	0	0	0	0	0	0	0	0	84	0	713	Bacteria{superkingdom}(100);Proteobacteria{phylum}(100);Gammaproteobacteria{class}(100);Pasteurellales{order}(100);Pasteurellaceae{family}(100);Haemophilus{genus}(100);Unassigned{species}(0)	Bacteria	Proteobacteria	Gammaproteobacteria	Pasteurellales	Pasteurellaceae	Haemophilus	Unassigned
ASV267	30	0	0	0	0	0	0	0	0	0	0	0	0	0	0	0	0	0	0	0	0	1	1349	0	0	0	0	0	0	0	0	0	0	0	21	0	0	0	1	0	1402	Bacteria{superkingdom}(100);Proteobacteria{phylum}(100);Gammaproteobacteria{class}(100);Pasteurellales{order}(100);Pasteurellaceae{family}(100);Haemophilus{genus}(100);Unassigned{species}(0)	Bacteria	Proteobacteria	Gammaproteobacteria	Pasteurellales	Pasteurellaceae	Haemophilus	Unassigned
ASV268	11	0	23	0	0	0	136	8	12	116	0	6	0	0	108	7	0	0	90	38	0	0	0	37	0	0	87	55	0	39	81	6	51	12	0	0	5	24	0	42	994	Bacteria{superkingdom}(98);Firmicutes{phylum}(98);Clostridia{class}(98);Clostridiales{order}(98);Lachnospiraceae{family}(98);Lachnospiracea_incertae_sedis{genus}(98);Eubacterium_ramulus{species}(98)	Bacteria	Firmicutes	Clostridia	Clostridiales	Lachnospiraceae	Lachnospiracea_incertae_sedis	Eubacterium_ramulus
ASV269	0	0	0	0	0	0	37	0	0	0	0	44	0	0	0	0	32	42	0	0	0	0	0	0	0	0	44	0	0	0	55	279	25	0	0	408	0	256	0	0	1222	Bacteria{superkingdom}(100);Bacteroidetes{phylum}(100);Bacteroidia{class}(100);Bacteroidales{order}(100);Bacteroidaceae{family}(100);Bacteroides{genus}(100);Bacteroides_finegoldii{species}(100)	Bacteria	Bacteroidetes	Bacteroidia	Bacteroidales	Bacteroidaceae	Bacteroides	Bacteroides_finegoldii
ASV270	12	127	0	0	0	0	0	0	0	0	0	0	0	0	0	0	0	0	0	0	556	0	0	0	0	0	0	16	0	0	0	0	0	5	0	0	0	0	1071	0	1787	Bacteria{superkingdom}(100);Firmicutes{phylum}(100);Clostridia{class}(100);Clostridiales{order}(100);Lachnospiraceae{family}(100);Unassigned{genus}(0);Unassigned{species}(0)	Bacteria	Firmicutes	Clostridia	Clostridiales	Lachnospiraceae	Unassigned	Unassigned
ASV271	203	0	0	0	0	0	24	0	0	0	0	0	0	46	0	0	0	0	87	20	0	0	0	0	31	0	109	0	36	0	142	0	0	0	0	0	86	0	0	16	800	Bacteria{superkingdom}(97);Bacteroidetes{phylum}(97);Bacteroidia{class}(97);Bacteroidales{order}(97);Bacteroidaceae{family}(97);Bacteroides{genus}(97);Bacteroides_ovatus{species}(97)	Bacteria	Bacteroidetes	Bacteroidia	Bacteroidales	Bacteroidaceae	Bacteroides	Bacteroides_ovatus
ASV272	0	0	0	3	0	172	1	0	0	0	0	0	0	0	0	0	0	0	0	0	0	0	0	0	0	50	0	0	0	0	0	0	0	0	0	0	0	0	0	0	226	Bacteria{superkingdom}(100);Bacteroidetes{phylum}(100);Bacteroidia{class}(100);Bacteroidales{order}(100);Prevotellaceae{family}(100);Prevotella{genus}(100);Unassigned{species}(0)	Bacteria	Bacteroidetes	Bacteroidia	Bacteroidales	Prevotellaceae	Prevotella	Unassigned
ASV273	0	0	0	0	0	0	0	0	0	0	2	0	0	0	0	0	54	0	0	0	0	0	0	0	0	0	0	0	0	0	107	0	0	0	0	0	0	178	0	0	341	Bacteria{superkingdom}(97);Bacteroidetes{phylum}(97);Bacteroidia{class}(97);Bacteroidales{order}(97);Bacteroidaceae{family}(97);Bacteroides{genus}(97);Bacteroides_massiliensis{species}(97)	Bacteria	Bacteroidetes	Bacteroidia	Bacteroidales	Bacteroidaceae	Bacteroides	Bacteroides_massiliensis
ASV274	0	0	0	0	0	0	0	0	0	0	0	0	0	0	0	0	3280	0	0	0	0	0	0	0	0	0	0	0	0	0	0	0	0	0	0	0	0	777	0	0	4057	Bacteria{superkingdom}(92);Firmicutes{phylum}(92);Clostridia{class}(92);Clostridiales{order}(92);Lachnospiraceae{family}(92);Lachnospiracea_incertae_sedis{genus}(92);Unassigned{species}(0)	Bacteria	Firmicutes	Clostridia	Clostridiales	Lachnospiraceae	Lachnospiracea_incertae_sedis	Unassigned
ASV275	0	0	0	0	0	0	0	0	0	9	0	0	0	0	0	0	0	0	0	0	0	0	0	0	0	0	0	0	0	6	0	0	0	0	0	0	0	0	0	0	15	Bacteria{superkingdom}(98);Firmicutes{phylum}(98);Clostridia{class}(98);Clostridiales{order}(98);Ruminococcaceae{family}(98);{genus}(98);Clostridiaceae_bacterium_DJF_VR76{species}(98)	Bacteria	Firmicutes	Clostridia	Clostridiales	Ruminococcaceae		Clostridiaceae_bacterium_DJF_VR76
ASV277	213	0	0	0	0	0	0	0	0	0	0	0	0	0	0	0	0	0	0	0	0	40	0	0	0	0	0	0	95	17	0	0	0	0	0	0	0	0	0	0	365	Bacteria{superkingdom}(100);Firmicutes{phylum}(100);Clostridia{class}(100);Clostridiales{order}(100);Ruminococcaceae{family}(100);Clostridium_IV{genus}(100);uncultured_bacterium_adhufec53.25{species}(100)	Bacteria	Firmicutes	Clostridia	Clostridiales	Ruminococcaceae	Clostridium_IV	uncultured_bacterium_adhufec53.25
ASV278	0	0	0	0	0	0	0	0	0	0	0	0	0	0	0	0	0	0	1360	0	0	0	0	0	0	0	0	0	0	0	0	0	0	0	0	0	0	0	0	0	1360	Bacteria{superkingdom}(100);Firmicutes{phylum}(100);Erysipelotrichia{class}(100);Erysipelotrichales{order}(100);Erysipelotrichaceae{family}(100);Holdemanella{genus}(100);Unassigned{species}(0)	Bacteria	Firmicutes	Erysipelotrichia	Erysipelotrichales	Erysipelotrichaceae	Holdemanella	Unassigned
ASV279	0	550	0	0	0	0	0	0	0	0	0	0	0	0	0	12	46	0	0	0	174	0	0	0	0	0	0	0	0	0	0	0	0	0	0	0	74	188	0	0	1044	Bacteria{superkingdom}(98);Bacteroidetes{phylum}(98);Bacteroidia{class}(98);Bacteroidales{order}(98);Bacteroidaceae{family}(98);Bacteroides{genus}(98);Bacteroides_massiliensis{species}(98)	Bacteria	Bacteroidetes	Bacteroidia	Bacteroidales	Bacteroidaceae	Bacteroides	Bacteroides_massiliensis
ASV280	0	0	0	0	29	113	0	0	12	0	6	0	0	0	0	0	0	37	0	0	0	0	0	0	48	127	0	0	23	0	57	0	95	0	0	0	186	0	0	21	754	Bacteria{superkingdom}(94);Firmicutes{phylum}(94);Clostridia{class}(94);Clostridiales{order}(94);Ruminococcaceae{family}(94);Intestinimonas{genus}(94);Unassigned{species}(0)	Bacteria	Firmicutes	Clostridia	Clostridiales	Ruminococcaceae	Intestinimonas	Unassigned
ASV281	0	0	0	0	0	131	58	0	0	0	36	0	0	0	0	0	38	0	56	0	0	31	0	0	0	179	17	0	0	0	111	0	26	52	80	0	0	23	0	26	864	Bacteria{superkingdom}(96);Firmicutes{phylum}(96);Clostridia{class}(96);Clostridiales{order}(96);{family}(96);{genus}(96);uncultured_Bacteroidetes_bacterium{species}(96)	Bacteria	Firmicutes	Clostridia	Clostridiales			uncultured_Bacteroidetes_bacterium
ASV284	29	0	0	0	0	0	0	0	0	0	0	297	0	0	0	26	0	21	0	0	0	0	0	0	0	0	0	0	0	0	0	245	0	120	0	0	33	0	0	0	771	Bacteria{superkingdom}(100);Firmicutes{phylum}(100);Clostridia{class}(100);Clostridiales{order}(100);Ruminococcaceae{family}(100);Faecalibacterium{genus}(100);Unassigned{species}(0)	Bacteria	Firmicutes	Clostridia	Clostridiales	Ruminococcaceae	Faecalibacterium	Unassigned
ASV285	0	0	0	0	0	0	59	0	0	32	0	0	0	0	0	0	0	185	0	0	0	32	0	13	7	0	165	0	2	148	1	0	64	0	0	11	9	0	0	0	728	Bacteria{superkingdom}(90);Bacteroidetes{phylum}(90);Bacteroidia{class}(90);Bacteroidales{order}(90);Bacteroidaceae{family}(90);Bacteroides{genus}(90);Bacteroides_ovatus{species}(90)	Bacteria	Bacteroidetes	Bacteroidia	Bacteroidales	Bacteroidaceae	Bacteroides	Bacteroides_ovatus
ASV286	75	44	0	0	70	0	0	34	0	0	0	53	0	0	0	0	0	0	0	0	31	131	0	0	185	0	0	95	0	0	0	0	366	0	0	0	0	0	0	0	1084	Bacteria{superkingdom}(90);Firmicutes{phylum}(90);Clostridia{class}(90);Clostridiales{order}(90);Lachnospiraceae{family}(90);Lachnospiracea_incertae_sedis{genus}(90);uncultured_Eubacteriaceae_bacterium{species}(90)	Bacteria	Firmicutes	Clostridia	Clostridiales	Lachnospiraceae	Lachnospiracea_incertae_sedis	uncultured_Eubacteriaceae_bacterium
ASV287	0	0	0	0	0	0	1279	0	0	0	0	0	0	0	0	0	8	0	0	0	0	0	0	18	12	6	29	0	0	0	0	0	9	0	0	0	13	5	0	0	1379	Bacteria{superkingdom}(100);Firmicutes{phylum}(100);Bacilli{class}(100);Lactobacillales{order}(100);Lactobacillaceae{family}(100);Lactobacillus{genus}(100);Unassigned{species}(0)	Bacteria	Firmicutes	Bacilli	Lactobacillales	Lactobacillaceae	Lactobacillus	Unassigned
ASV288	0	0	0	0	0	0	0	0	0	0	0	0	0	0	0	0	0	0	0	0	0	0	0	0	0	0	0	0	0	0	61	0	0	0	0	0	0	0	0	0	61	Bacteria{superkingdom}(100);Firmicutes{phylum}(100);Negativicutes{class}(100);Selenomonadales{order}(100);Veillonellaceae{family}(100);Megamonas{genus}(100);Unassigned{species}(0)	Bacteria	Firmicutes	Negativicutes	Selenomonadales	Veillonellaceae	Megamonas	Unassigned
ASV289	0	0	0	0	0	0	0	0	0	0	0	0	0	0	0	66	0	0	0	7	0	0	0	0	0	0	0	0	0	0	0	0	0	0	0	0	0	0	0	0	73	Bacteria{superkingdom}(100);Firmicutes{phylum}(100);Negativicutes{class}(100);Selenomonadales{order}(100);Veillonellaceae{family}(100);Veillonella{genus}(100);Unassigned{species}(0)	Bacteria	Firmicutes	Negativicutes	Selenomonadales	Veillonellaceae	Veillonella	Unassigned
ASV290	0	0	0	0	0	0	0	0	0	0	0	0	0	0	0	0	44	0	424	0	0	0	0	0	0	0	0	0	0	0	0	0	0	0	0	0	0	123	0	0	591	Bacteria{superkingdom}(97);Bacteroidetes{phylum}(97);Bacteroidia{class}(97);Bacteroidales{order}(97);Porphyromonadaceae{family}(97);Barnesiella{genus}(97);uncultured_bacterium{species}(97)	Bacteria	Bacteroidetes	Bacteroidia	Bacteroidales	Porphyromonadaceae	Barnesiella	uncultured_bacterium
ASV291	0	0	0	97	0	0	0	0	0	0	0	0	0	0	226	0	0	0	0	0	0	0	0	71	0	0	0	0	0	0	0	0	0	0	0	0	0	0	0	0	394	Bacteria{superkingdom}(95);Firmicutes{phylum}(95);Clostridia{class}(95);Clostridiales{order}(95);Lachnospiraceae{family}(95);Lachnospiracea_incertae_sedis{genus}(95);Unassigned{species}(0)	Bacteria	Firmicutes	Clostridia	Clostridiales	Lachnospiraceae	Lachnospiracea_incertae_sedis	Unassigned
ASV292	33	0	0	6	0	0	54	0	0	0	0	0	0	21	0	0	0	12	34	0	0	8	0	20	4	0	264	0	0	0	18	0	57	16	0	4	0	0	0	0	551	Bacteria{superkingdom}(100);Bacteroidetes{phylum}(100);Bacteroidia{class}(100);Bacteroidales{order}(100);Rikenellaceae{family}(100);Alistipes{genus}(100);Unassigned{species}(0)	Bacteria	Bacteroidetes	Bacteroidia	Bacteroidales	Rikenellaceae	Alistipes	Unassigned
ASV294	0	0	32	21	62	0	66	0	35	80	0	0	0	0	0	67	19	19	20	0	0	16	7	34	47	0	41	0	59	31	0	0	0	0	0	24	14	0	0	28	722	Bacteria{superkingdom}(100);Firmicutes{phylum}(100);Clostridia{class}(100);Clostridiales{order}(100);Lachnospiraceae{family}(100);Unassigned{genus}(0);Unassigned{species}(0)	Bacteria	Firmicutes	Clostridia	Clostridiales	Lachnospiraceae	Unassigned	Unassigned
ASV295	0	0	0	0	0	0	0	0	0	0	0	0	0	0	0	0	0	0	73	0	0	0	0	0	3	0	0	0	0	0	0	0	0	0	0	19	0	22	0	0	117	Bacteria{superkingdom}(100);Firmicutes{phylum}(100);Erysipelotrichia{class}(100);Erysipelotrichales{order}(100);Erysipelotrichaceae{family}(100);Turicibacter{genus}(100);Unassigned{species}(0)	Bacteria	Firmicutes	Erysipelotrichia	Erysipelotrichales	Erysipelotrichaceae	Turicibacter	Unassigned
ASV296	0	0	0	0	0	0	0	0	0	0	0	0	0	0	0	0	0	0	0	0	0	0	0	0	0	0	0	0	0	0	0	0	0	36	0	0	0	0	0	0	36	Bacteria{superkingdom}(100);Bacteroidetes{phylum}(100);Bacteroidia{class}(100);Bacteroidales{order}(100);Bacteroidaceae{family}(100);Bacteroides{genus}(100);Unassigned{species}(0)	Bacteria	Bacteroidetes	Bacteroidia	Bacteroidales	Bacteroidaceae	Bacteroides	Unassigned
ASV297	9	73	0	7	37	37	50	0	0	11	0	10	0	0	0	70	0	8	134	11	107	6	0	86	76	38	25	0	0	0	0	5	0	0	0	15	46	14	0	21	896	Bacteria{superkingdom}(97);Firmicutes{phylum}(97);Clostridia{class}(97);Clostridiales{order}(97);Lachnospiraceae{family}(97);Lachnospiracea_incertae_sedis{genus}(97);Eubacterium_ramulus{species}(97)	Bacteria	Firmicutes	Clostridia	Clostridiales	Lachnospiraceae	Lachnospiracea_incertae_sedis	Eubacterium_ramulus
ASV298	196	39	14	0	43	15	0	24	0	54	6	0	0	23	64	16	0	12	0	0	52	0	13	0	0	67	0	55	0	39	35	0	0	0	17	0	0	0	46	25	855	Bacteria{superkingdom}(100);Firmicutes{phylum}(100);Clostridia{class}(100);Clostridiales{order}(100);Ruminococcaceae{family}(100);Clostridium_IV{genus}(100);Unassigned{species}(0)	Bacteria	Firmicutes	Clostridia	Clostridiales	Ruminococcaceae	Clostridium_IV	Unassigned
ASV299	8	0	0	30	10	23	71	0	0	0	10	0	0	14	22	0	22	0	111	0	0	35	0	41	0	45	13	0	14	0	0	0	21	0	20	27	0	0	0	16	553	Bacteria{superkingdom}(100);Firmicutes{phylum}(100);Clostridia{class}(100);Clostridiales{order}(100);Lachnospiraceae{family}(100);Unassigned{genus}(0);Unassigned{species}(0)	Bacteria	Firmicutes	Clostridia	Clostridiales	Lachnospiraceae	Unassigned	Unassigned
ASV300	0	0	0	0	0	0	0	0	0	0	0	0	0	0	0	0	0	0	0	0	0	778	0	0	0	0	0	0	0	0	0	0	0	0	0	0	0	0	0	0	778	Bacteria{superkingdom}(94);Bacteroidetes{phylum}(94);Bacteroidia{class}(94);Bacteroidales{order}(94);Prevotellaceae{family}(94);Prevotella{genus}(94);Unassigned{species}(0)	Bacteria	Bacteroidetes	Bacteroidia	Bacteroidales	Prevotellaceae	Prevotella	Unassigned
ASV301	0	0	0	0	0	0	0	0	0	0	0	37	0	0	0	0	0	0	15	14	0	87	0	0	0	0	50	0	59	0	0	13	51	0	0	15	54	0	0	13	408	Bacteria{superkingdom}(100);Bacteroidetes{phylum}(100);Bacteroidia{class}(100);Bacteroidales{order}(100);Porphyromonadaceae{family}(100);Odoribacter{genus}(100);Unassigned{species}(0)	Bacteria	Bacteroidetes	Bacteroidia	Bacteroidales	Porphyromonadaceae	Odoribacter	Unassigned
ASV302	0	5	221	6	0	0	0	0	14	19	0	8	0	29	48	7	6	50	0	0	32	0	10	5	0	0	0	0	0	12	0	130	0	0	53	0	16	3	0	0	674	Bacteria{superkingdom}(100);Actinobacteria{phylum}(100);Actinobacteria{class}(100);Bifidobacteriales{order}(100);Bifidobacteriaceae{family}(100);Bifidobacterium{genus}(100);Unassigned{species}(0)	Bacteria	Actinobacteria	Actinobacteria	Bifidobacteriales	Bifidobacteriaceae	Bifidobacterium	Unassigned
ASV304	0	0	0	0	0	0	422	0	0	0	0	0	0	0	65	0	0	0	0	0	0	0	0	6	0	0	92	0	0	0	0	0	0	0	0	0	0	21	0	0	606	Bacteria{superkingdom}(100);Firmicutes{phylum}(100);Clostridia{class}(100);Clostridiales{order}(100);Lachnospiraceae{family}(100);Unassigned{genus}(0);Unassigned{species}(0)	Bacteria	Firmicutes	Clostridia	Clostridiales	Lachnospiraceae	Unassigned	Unassigned
ASV305	0	0	0	12	0	0	0	0	0	0	0	0	0	0	0	0	0	0	0	0	0	193	0	384	136	0	0	0	0	0	0	0	0	0	0	0	0	0	0	0	725	Bacteria{superkingdom}(80);Bacteroidetes{phylum}(80);Bacteroidia{class}(80);Bacteroidales{order}(80);Bacteroidaceae{family}(80);Bacteroides{genus}(80);Bacteroides_faecis{species}(80)	Bacteria	Bacteroidetes	Bacteroidia	Bacteroidales	Bacteroidaceae	Bacteroides	Bacteroides_faecis
ASV306	0	0	0	0	0	0	0	0	23	0	0	0	0	0	0	0	0	0	0	0	0	0	0	0	0	0	0	0	2528	0	49	0	0	4	0	0	0	0	0	0	2604	Bacteria{superkingdom}(97);Bacteroidetes{phylum}(97);Bacteroidia{class}(97);Bacteroidales{order}(97);Rikenellaceae{family}(97);Alistipes{genus}(97);Alistipes_inops{species}(97)	Bacteria	Bacteroidetes	Bacteroidia	Bacteroidales	Rikenellaceae	Alistipes	Alistipes_inops
ASV307	0	0	10	0	34	0	0	0	0	0	0	0	0	354	0	341	34	0	0	0	0	76	195	0	17	0	0	0	13	0	0	0	0	0	31	0	0	1	0	0	1106	Bacteria{superkingdom}(100);Proteobacteria{phylum}(100);Gammaproteobacteria{class}(100);Enterobacteriales{order}(100);Enterobacteriaceae{family}(100);Unassigned{genus}(0);Unassigned{species}(0)	Bacteria	Proteobacteria	Gammaproteobacteria	Enterobacteriales	Enterobacteriaceae	Unassigned	Unassigned
ASV308	0	0	0	0	0	0	0	0	0	0	80	0	0	0	0	37	0	0	0	0	0	0	0	0	0	0	0	0	0	0	94	0	0	21	0	0	43	0	0	0	275	Bacteria{superkingdom}(93);Actinobacteria{phylum}(93);Actinobacteria{class}(93);Bifidobacteriales{order}(93);Bifidobacteriaceae{family}(93);Bifidobacterium{genus}(93);Bifidobacterium_longum{species}(93)	Bacteria	Actinobacteria	Actinobacteria	Bifidobacteriales	Bifidobacteriaceae	Bifidobacterium	Bifidobacterium_longum
ASV309	0	0	0	0	0	0	0	0	0	0	0	0	0	0	0	0	0	10	0	0	0	0	0	0	0	0	0	0	0	0	0	8	0	0	0	0	0	20	0	0	38	Bacteria{superkingdom}(100);Firmicutes{phylum}(100);Clostridia{class}(100);Clostridiales{order}(100);Ruminococcaceae{family}(100);{genus}(100);uncultured_Paludibacter_sp.{species}(100)	Bacteria	Firmicutes	Clostridia	Clostridiales	Ruminococcaceae		uncultured_Paludibacter_sp.
ASV311	0	0	0	0	0	260	0	0	0	9	0	2	0	0	0	0	69	110	78	0	0	0	0	0	0	156	0	0	0	25	0	4	542	83	0	6	0	7	0	0	1351	Bacteria{superkingdom}(100);Actinobacteria{phylum}(100);Actinobacteria{class}(100);Coriobacteriales{order}(100);Coriobacteriaceae{family}(100);{genus}(100);uncultured_organism{species}(100)	Bacteria	Actinobacteria	Actinobacteria	Coriobacteriales	Coriobacteriaceae		uncultured_organism
ASV312	0	0	0	0	0	0	0	0	0	9	0	0	0	116	0	0	12	16	6	0	0	0	0	0	0	0	22	0	0	9	0	0	0	0	271	0	37	119	0	0	617	Bacteria{superkingdom}(100);Firmicutes{phylum}(100);Clostridia{class}(100);Clostridiales{order}(100);Lachnospiraceae{family}(100);Unassigned{genus}(0);Unassigned{species}(0)	Bacteria	Firmicutes	Clostridia	Clostridiales	Lachnospiraceae	Unassigned	Unassigned
ASV313	0	0	0	0	0	0	0	0	0	0	0	0	0	0	0	0	0	70	0	0	0	0	0	0	0	0	0	0	0	0	0	0	0	1009	0	0	0	0	0	0	1079	Bacteria{superkingdom}(100);Bacteroidetes{phylum}(100);Bacteroidia{class}(100);Bacteroidales{order}(100);Prevotellaceae{family}(100);Paraprevotella{genus}(100);Unassigned{species}(0)	Bacteria	Bacteroidetes	Bacteroidia	Bacteroidales	Prevotellaceae	Paraprevotella	Unassigned
ASV314	0	0	0	0	0	0	0	42	0	9	0	0	0	0	0	0	0	0	0	0	0	0	0	0	0	0	0	1571	0	5	40	0	0	0	0	0	0	0	0	0	1667	Bacteria{superkingdom}(98);Bacteroidetes{phylum}(98);Bacteroidia{class}(98);Bacteroidales{order}(98);Bacteroidaceae{family}(98);Bacteroides{genus}(98);Bacteroides_ovatus{species}(98)	Bacteria	Bacteroidetes	Bacteroidia	Bacteroidales	Bacteroidaceae	Bacteroides	Bacteroides_ovatus
ASV315	0	0	0	0	0	0	0	0	111	0	0	4	0	0	0	23	0	0	0	0	0	0	0	0	0	0	0	0	0	0	0	0	0	0	5	0	0	0	0	0	143	Bacteria{superkingdom}(100);Firmicutes{phylum}(100);Bacilli{class}(100);Lactobacillales{order}(100);Streptococcaceae{family}(100);Streptococcus{genus}(100);Unassigned{species}(0)	Bacteria	Firmicutes	Bacilli	Lactobacillales	Streptococcaceae	Streptococcus	Unassigned
ASV316	18	3	0	18	5	0	0	0	212	91	0	0	331	0	0	0	0	0	0	85	7	0	0	47	11	0	0	174	112	0	0	0	0	0	22	49	0	0	45	63	1293	Bacteria{superkingdom}(100);Firmicutes{phylum}(100);Clostridia{class}(100);Clostridiales{order}(100);Lachnospiraceae{family}(100);Anaerostipes{genus}(100);Unassigned{species}(0)	Bacteria	Firmicutes	Clostridia	Clostridiales	Lachnospiraceae	Anaerostipes	Unassigned
ASV317	0	0	0	0	61	0	0	256	84	36	78	0	0	0	0	0	0	0	0	0	0	0	0	0	110	0	0	227	36	51	36	0	0	0	0	0	0	0	51	0	1026	Bacteria{superkingdom}(100);Firmicutes{phylum}(100);Clostridia{class}(100);Clostridiales{order}(100);Lachnospiraceae{family}(100);Anaerostipes{genus}(100);Unassigned{species}(0)	Bacteria	Firmicutes	Clostridia	Clostridiales	Lachnospiraceae	Anaerostipes	Unassigned
ASV318	0	0	20	0	33	0	0	599	0	55	28	0	0	0	8	33	81	0	0	0	0	0	21	0	0	0	0	0	0	9	0	0	0	0	0	0	0	53	0	0	940	Bacteria{superkingdom}(97);Proteobacteria{phylum}(97);Gammaproteobacteria{class}(97);Enterobacteriales{order}(97);Enterobacteriaceae{family}(97);Klebsiella{genus}(97);Unassigned{species}(0)	Bacteria	Proteobacteria	Gammaproteobacteria	Enterobacteriales	Enterobacteriaceae	Klebsiella	Unassigned
ASV319	0	0	0	4	0	0	0	0	0	0	0	0	0	37	0	0	0	17	182	0	0	18	0	0	0	0	4	0	22	0	30	0	0	102	16	21	27	5	0	12	497	Bacteria{superkingdom}(100);Firmicutes{phylum}(100);Clostridia{class}(100);Clostridiales{order}(100);Lachnospiraceae{family}(100);Clostridium_XlVb{genus}(100);Unassigned{species}(0)	Bacteria	Firmicutes	Clostridia	Clostridiales	Lachnospiraceae	Clostridium_XlVb	Unassigned
ASV320	23	12	0	0	0	0	23	14	0	84	36	10	0	0	170	0	18	31	31	18	20	0	0	21	21	0	17	19	0	40	28	7	18	25	0	0	13	34	0	55	788	Bacteria{superkingdom}(84);Firmicutes{phylum}(84);Clostridia{class}(84);Clostridiales{order}(84);Lachnospiraceae{family}(84);{genus}(84);uncultured_bacterium_adhufec405{species}(84)	Bacteria	Firmicutes	Clostridia	Clostridiales	Lachnospiraceae		uncultured_bacterium_adhufec405
ASV321	0	0	0	9	0	0	0	0	0	0	0	35	0	0	0	0	0	26	12	0	0	9	0	0	0	0	32	0	0	0	0	31	7	32	0	0	39	12	0	0	244	Bacteria{superkingdom}(100);Bacteroidetes{phylum}(100);Bacteroidia{class}(100);Bacteroidales{order}(100);Rikenellaceae{family}(100);Alistipes{genus}(100);Unassigned{species}(0)	Bacteria	Bacteroidetes	Bacteroidia	Bacteroidales	Rikenellaceae	Alistipes	Unassigned
ASV322	0	39	0	30	6	45	8	0	0	7	0	4	0	33	0	0	0	9	11	0	97	0	0	9	51	36	12	83	4	80	15	3	59	0	93	10	7	4	33	0	788	Bacteria{superkingdom}(100);Firmicutes{phylum}(100);Clostridia{class}(100);Clostridiales{order}(100);Ruminococcaceae{family}(100);{genus}(100);Unassigned{species}(0)	Bacteria	Firmicutes	Clostridia	Clostridiales	Ruminococcaceae		Unassigned
ASV323	0	0	0	0	0	0	139	0	0	0	0	0	0	0	0	0	0	0	0	0	0	0	0	0	0	0	0	0	0	0	0	0	0	0	0	0	0	0	0	0	139	Bacteria{superkingdom}(100);Bacteroidetes{phylum}(100);Bacteroidia{class}(100);Bacteroidales{order}(100);Prevotellaceae{family}(100);Prevotella{genus}(100);Unassigned{species}(0)	Bacteria	Bacteroidetes	Bacteroidia	Bacteroidales	Prevotellaceae	Prevotella	Unassigned
ASV324	0	0	0	0	0	60	0	0	0	0	0	0	11	57	0	0	0	23	0	0	0	11	0	0	0	133	15	0	0	0	11	0	0	18	0	24	3	0	0	0	366	Bacteria{superkingdom}(94);Firmicutes{phylum}(94);Clostridia{class}(94);Clostridiales{order}(94);Lachnospiraceae{family}(94);Lachnospiracea_incertae_sedis{genus}(94);Eubacterium_eligens_ATCC_27750{species}(94)	Bacteria	Firmicutes	Clostridia	Clostridiales	Lachnospiraceae	Lachnospiracea_incertae_sedis	Eubacterium_eligens_ATCC_27750
ASV325	0	0	0	0	0	0	0	0	0	908	0	0	0	0	0	0	0	0	44	0	0	0	0	0	0	0	0	0	0	174	0	0	0	0	0	0	0	0	0	0	1126	Bacteria{superkingdom}(94);Firmicutes{phylum}(94);Clostridia{class}(94);Clostridiales{order}(94);Ruminococcaceae{family}(94);Ruminococcus{genus}(94);Ruminococcus_bromii{species}(94)	Bacteria	Firmicutes	Clostridia	Clostridiales	Ruminococcaceae	Ruminococcus	Ruminococcus_bromii
ASV326	0	0	0	2	0	41	0	0	0	0	0	0	0	0	0	0	0	0	13	0	0	0	0	0	0	12	0	0	0	0	0	0	0	0	0	0	0	0	0	0	68	Bacteria{superkingdom}(100);Bacteroidetes{phylum}(100);Bacteroidia{class}(100);Bacteroidales{order}(100);Prevotellaceae{family}(100);Prevotella{genus}(100);Unassigned{species}(0)	Bacteria	Bacteroidetes	Bacteroidia	Bacteroidales	Prevotellaceae	Prevotella	Unassigned
ASV327	0	0	0	0	0	0	0	0	0	0	0	0	0	718	0	0	0	0	0	0	0	0	0	0	0	0	0	0	0	0	0	0	0	31	74	71	0	0	0	0	894	Bacteria{superkingdom}(93);Bacteroidetes{phylum}(93);Bacteroidia{class}(93);Bacteroidales{order}(93);Bacteroidaceae{family}(93);Bacteroides{genus}(93);Bacteroides_vulgatus{species}(93)	Bacteria	Bacteroidetes	Bacteroidia	Bacteroidales	Bacteroidaceae	Bacteroides	Bacteroides_vulgatus
ASV328	0	0	0	0	0	0	0	0	0	0	0	0	0	0	0	0	0	0	10	0	0	0	0	0	0	0	0	0	0	0	0	0	68	67	0	0	0	0	0	0	145	Bacteria{superkingdom}(99);Bacteroidetes{phylum}(99);Bacteroidia{class}(99);Bacteroidales{order}(99);Porphyromonadaceae{family}(99);Coprobacter{genus}(99);uncultured_organism{species}(99)	Bacteria	Bacteroidetes	Bacteroidia	Bacteroidales	Porphyromonadaceae	Coprobacter	uncultured_organism
ASV330	0	0	0	0	0	39	0	0	0	0	0	0	0	0	0	0	0	0	0	0	0	0	0	0	0	0	0	0	0	0	0	0	0	0	0	0	0	0	0	0	39	Bacteria{superkingdom}(100);Bacteroidetes{phylum}(100);Bacteroidia{class}(100);Bacteroidales{order}(100);Bacteroidaceae{family}(100);Bacteroides{genus}(100);Unassigned{species}(0)	Bacteria	Bacteroidetes	Bacteroidia	Bacteroidales	Bacteroidaceae	Bacteroides	Unassigned
ASV332	0	0	0	0	0	0	0	0	0	0	0	0	0	0	0	0	0	0	29	0	0	142	0	0	0	0	0	0	0	0	0	0	0	0	0	381	0	0	0	0	552	Bacteria{superkingdom}(100);Bacteroidetes{phylum}(100);Bacteroidia{class}(100);Bacteroidales{order}(100);Porphyromonadaceae{family}(100);Parabacteroides{genus}(100);Unassigned{species}(0)	Bacteria	Bacteroidetes	Bacteroidia	Bacteroidales	Porphyromonadaceae	Parabacteroides	Unassigned
ASV334	23	0	26	0	15	0	0	0	0	0	0	0	0	0	0	44	0	0	0	9	5	0	205	0	0	0	0	0	0	0	0	0	0	0	0	0	0	0	0	0	327	Bacteria{superkingdom}(100);Firmicutes{phylum}(100);Negativicutes{class}(100);Selenomonadales{order}(100);Veillonellaceae{family}(100);Veillonella{genus}(100);Unassigned{species}(0)	Bacteria	Firmicutes	Negativicutes	Selenomonadales	Veillonellaceae	Veillonella	Unassigned
ASV335	718	0	0	0	0	0	0	0	0	0	0	0	0	0	0	0	0	0	0	0	0	62	0	0	0	0	0	0	0	0	188	0	0	0	0	0	0	26	0	0	994	Bacteria{superkingdom}(100);Firmicutes{phylum}(100);Clostridia{class}(100);Clostridiales{order}(100);Ruminococcaceae{family}(100);Faecalibacterium{genus}(100);Unassigned{species}(0)	Bacteria	Firmicutes	Clostridia	Clostridiales	Ruminococcaceae	Faecalibacterium	Unassigned
ASV336	0	0	0	0	0	0	0	0	0	77	0	0	0	0	0	0	0	0	0	0	0	0	0	0	0	0	0	16	0	705	244	0	0	0	0	0	0	6	0	0	1048	Bacteria{superkingdom}(96);Bacteroidetes{phylum}(96);Bacteroidia{class}(96);Bacteroidales{order}(96);Bacteroidaceae{family}(96);Bacteroides{genus}(96);Bacteroides_intestinalis{species}(96)	Bacteria	Bacteroidetes	Bacteroidia	Bacteroidales	Bacteroidaceae	Bacteroides	Bacteroides_intestinalis
ASV337	0	1027	0	0	0	0	0	0	0	0	0	0	0	0	0	0	0	0	0	0	1072	0	0	0	0	0	0	0	0	0	0	0	0	0	0	0	0	0	159	0	2258	Bacteria{superkingdom}(100);Fusobacteria{phylum}(100);Fusobacteriia{class}(100);Fusobacteriales{order}(100);Fusobacteriaceae{family}(100);Fusobacterium{genus}(100);Unassigned{species}(0)	Bacteria	Fusobacteria	Fusobacteriia	Fusobacteriales	Fusobacteriaceae	Fusobacterium	Unassigned
ASV338	7	141	0	0	0	5	0	0	0	7	0	11	0	0	0	0	0	0	125	0	97	0	0	0	19	22	0	143	0	16	0	10	15	0	0	0	15	11	164	0	808	Bacteria{superkingdom}(100);Firmicutes{phylum}(100);Clostridia{class}(100);Clostridiales{order}(100);Ruminococcaceae{family}(100);Flavonifractor{genus}(100);Unassigned{species}(0)	Bacteria	Firmicutes	Clostridia	Clostridiales	Ruminococcaceae	Flavonifractor	Unassigned
ASV339	0	0	0	0	0	0	0	0	0	0	0	0	0	0	0	0	2	0	0	0	0	0	0	0	0	0	0	0	0	0	0	0	0	0	0	0	0	0	0	0	2	Bacteria{superkingdom}(91);Bacteroidetes{phylum}(91);Bacteroidia{class}(91);Bacteroidales{order}(91);Prevotellaceae{family}(91);Prevotella{genus}(91);uncultured_Bacteroidetes_bacterium{species}(91)	Bacteria	Bacteroidetes	Bacteroidia	Bacteroidales	Prevotellaceae	Prevotella	uncultured_Bacteroidetes_bacterium
ASV340	0	0	0	0	0	0	8	0	0	0	0	23	0	73	0	0	0	55	19	0	0	0	0	0	58	0	136	0	46	0	3	14	104	0	22	0	25	0	0	29	615	Bacteria{superkingdom}(98);Bacteroidetes{phylum}(98);Bacteroidia{class}(98);Bacteroidales{order}(98);Rikenellaceae{family}(98);Alistipes{genus}(98);Alistipes_sp._cv1{species}(98)	Bacteria	Bacteroidetes	Bacteroidia	Bacteroidales	Rikenellaceae	Alistipes	Alistipes_sp._cv1
ASV341	0	0	0	0	0	0	0	0	0	0	0	43	0	0	0	0	0	40	0	0	0	17	0	0	0	0	0	0	0	0	0	0	0	0	0	0	0	62	0	0	162	Bacteria{superkingdom}(94);Bacteroidetes{phylum}(94);Bacteroidia{class}(94);Bacteroidales{order}(94);Porphyromonadaceae{family}(94);Parabacteroides{genus}(94);Parabacteroides_distasonis{species}(94)	Bacteria	Bacteroidetes	Bacteroidia	Bacteroidales	Porphyromonadaceae	Parabacteroides	Parabacteroides_distasonis
ASV342	18	0	12	0	63	0	0	0	43	0	0	0	114	0	0	34	95	0	0	0	0	0	29	0	18	0	0	0	0	22	0	0	0	0	71	0	0	0	53	38	610	Bacteria{superkingdom}(100);Proteobacteria{phylum}(100);Gammaproteobacteria{class}(100);Enterobacteriales{order}(100);Enterobacteriaceae{family}(100);Unassigned{genus}(0);Unassigned{species}(0)	Bacteria	Proteobacteria	Gammaproteobacteria	Enterobacteriales	Enterobacteriaceae	Unassigned	Unassigned
ASV343	0	0	0	11	0	27	0	0	0	0	0	46	0	0	0	0	21	0	19	0	0	0	0	22	0	30	0	0	0	0	0	25	589	10	0	20	62	60	0	0	942	Bacteria{superkingdom}(100);Bacteroidetes{phylum}(100);Bacteroidia{class}(100);Bacteroidales{order}(100);Rikenellaceae{family}(100);Alistipes{genus}(100);Candidatus_Alistipes_marseilloanorexicus_AP11{species}(100)	Bacteria	Bacteroidetes	Bacteroidia	Bacteroidales	Rikenellaceae	Alistipes	Candidatus_Alistipes_marseilloanorexicus_AP11
ASV344	0	0	0	0	0	0	0	0	0	0	0	0	0	0	0	0	0	0	0	0	0	11	0	0	0	0	0	0	0	0	0	0	9	63	0	282	0	0	0	0	365	Bacteria{superkingdom}(99);Bacteroidetes{phylum}(99);Bacteroidia{class}(99);Bacteroidales{order}(99);Bacteroidaceae{family}(99);Bacteroides{genus}(99);Bacteroides_intestinalis{species}(99)	Bacteria	Bacteroidetes	Bacteroidia	Bacteroidales	Bacteroidaceae	Bacteroides	Bacteroides_intestinalis
ASV346	0	0	0	0	0	0	0	0	0	0	0	21	0	0	0	0	6	0	18	0	0	0	0	0	0	0	109	0	0	0	0	14	99	0	0	23	0	15	0	0	305	Bacteria{superkingdom}(100);Firmicutes{phylum}(100);Clostridia{class}(100);Clostridiales{order}(100);Christensenellaceae{family}(100);Christensenella{genus}(100);Unassigned{species}(0)	Bacteria	Firmicutes	Clostridia	Clostridiales	Christensenellaceae	Christensenella	Unassigned
ASV347	0	0	0	0	0	0	38	0	0	0	0	0	0	0	0	0	0	0	31	0	0	0	0	0	0	0	20	0	0	0	0	0	0	0	67	0	0	0	0	0	156	Bacteria{superkingdom}(89);Firmicutes{phylum}(89);Clostridia{class}(89);Clostridiales{order}(89);{family}(89);{genus}(89);uncultured_Bacteroidetes_bacterium{species}(89)	Bacteria	Firmicutes	Clostridia	Clostridiales			uncultured_Bacteroidetes_bacterium
ASV349	0	0	0	0	0	0	0	0	0	0	0	0	0	0	0	0	0	0	0	0	0	0	907	0	0	0	0	0	0	0	0	0	0	0	0	0	0	0	0	0	907	Bacteria{superkingdom}(100);Proteobacteria{phylum}(100);Gammaproteobacteria{class}(100);Pasteurellales{order}(100);Pasteurellaceae{family}(100);Haemophilus{genus}(100);Unassigned{species}(0)	Bacteria	Proteobacteria	Gammaproteobacteria	Pasteurellales	Pasteurellaceae	Haemophilus	Unassigned
ASV350	123	0	0	0	0	0	0	0	0	0	0	0	0	44	0	0	0	0	0	35	72	113	0	0	0	0	23	0	0	71	0	0	0	0	72	0	21	44	0	56	674	Bacteria{superkingdom}(100);Firmicutes{phylum}(100);Clostridia{class}(100);Clostridiales{order}(100);Lachnospiraceae{family}(100);Roseburia{genus}(100);Unassigned{species}(0)	Bacteria	Firmicutes	Clostridia	Clostridiales	Lachnospiraceae	Roseburia	Unassigned
ASV352	0	8	0	20	1	0	0	7	0	12	0	0	383	33	18	0	0	0	0	3	12	0	0	0	8	0	0	0	0	4	0	0	0	0	23	0	0	0	198	16	746	Bacteria{superkingdom}(96);Firmicutes{phylum}(96);Erysipelotrichia{class}(96);Erysipelotrichales{order}(96);Erysipelotrichaceae{family}(96);Clostridium_XVIII{genus}(96);Clostridium_ramosum{species}(96)	Bacteria	Firmicutes	Erysipelotrichia	Erysipelotrichales	Erysipelotrichaceae	Clostridium_XVIII	Clostridium_ramosum
ASV353	8	0	0	0	0	38	0	0	0	0	0	0	0	0	0	7	0	0	0	0	0	0	0	0	0	46	0	191	0	0	29	0	0	0	0	0	42	0	0	0	361	Bacteria{superkingdom}(100);Bacteroidetes{phylum}(100);Bacteroidia{class}(100);Bacteroidales{order}(100);Porphyromonadaceae{family}(100);Parabacteroides{genus}(100);Unassigned{species}(0)	Bacteria	Bacteroidetes	Bacteroidia	Bacteroidales	Porphyromonadaceae	Parabacteroides	Unassigned
ASV354	0	0	0	0	0	0	0	0	0	0	0	0	0	0	0	0	6	0	0	0	0	0	0	0	0	0	0	0	0	0	0	0	0	0	0	0	0	0	0	0	6	Bacteria{superkingdom}(98);Bacteroidetes{phylum}(98);Bacteroidia{class}(98);Bacteroidales{order}(98);Prevotellaceae{family}(98);Alloprevotella{genus}(98);uncultured_Bacteroidetes_bacterium{species}(98)	Bacteria	Bacteroidetes	Bacteroidia	Bacteroidales	Prevotellaceae	Alloprevotella	uncultured_Bacteroidetes_bacterium
ASV355	0	0	0	0	0	0	0	0	0	0	0	0	0	0	0	0	116	0	72	0	0	0	0	0	0	0	0	0	0	0	0	0	0	81	0	0	0	44	0	0	313	Bacteria{superkingdom}(99);Actinobacteria{phylum}(99);Actinobacteria{class}(99);Coriobacteriales{order}(99);Coriobacteriaceae{family}(99);Senegalimassilia{genus}(99);uncultured_bacterium{species}(99)	Bacteria	Actinobacteria	Actinobacteria	Coriobacteriales	Coriobacteriaceae	Senegalimassilia	uncultured_bacterium
ASV356	0	0	0	0	0	0	12	0	0	0	0	0	0	0	0	0	6	4	23	0	0	0	0	0	0	0	68	0	0	0	0	0	48	0	0	0	11	9	0	0	181	Bacteria{superkingdom}(96);Firmicutes{phylum}(96);Clostridia{class}(96);Clostridiales{order}(96);Ruminococcaceae{family}(96);{genus}(96);Unassigned{species}(0)	Bacteria	Firmicutes	Clostridia	Clostridiales	Ruminococcaceae		Unassigned
ASV357	0	0	0	0	8	0	0	0	0	0	0	0	0	0	0	0	0	0	0	0	0	0	0	0	94	0	0	0	0	0	0	0	0	0	0	0	0	0	0	0	102	Bacteria{superkingdom}(91);Bacteroidetes{phylum}(91);Bacteroidia{class}(91);Bacteroidales{order}(91);Porphyromonadaceae{family}(91);Barnesiella{genus}(91);uncultured_organism{species}(91)	Bacteria	Bacteroidetes	Bacteroidia	Bacteroidales	Porphyromonadaceae	Barnesiella	uncultured_organism
ASV358	0	0	0	0	0	0	0	0	0	0	0	0	0	0	0	0	0	0	0	0	0	56	0	0	0	0	0	1	0	0	0	0	137	0	0	0	0	0	0	0	194	Bacteria{superkingdom}(88);Bacteroidetes{phylum}(88);Bacteroidia{class}(88);Bacteroidales{order}(88);Bacteroidaceae{family}(88);Bacteroides{genus}(88);Bacteroides_uniformis{species}(88)	Bacteria	Bacteroidetes	Bacteroidia	Bacteroidales	Bacteroidaceae	Bacteroides	Bacteroides_uniformis
ASV359	0	0	0	0	0	0	0	0	0	0	0	0	12	32	0	0	0	0	0	0	0	0	0	0	0	0	0	0	0	0	0	0	0	0	127	0	0	0	0	0	171	Bacteria{superkingdom}(98);Firmicutes{phylum}(98);Clostridia{class}(98);Clostridiales{order}(98);Lachnospiraceae{family}(98);Ruminococcus2{genus}(98);Unassigned{species}(0)	Bacteria	Firmicutes	Clostridia	Clostridiales	Lachnospiraceae	Ruminococcus2	Unassigned
ASV360	0	0	0	0	0	0	244	0	0	0	0	0	0	0	0	0	0	0	0	0	0	372	0	0	0	0	48	0	0	0	0	0	0	0	0	0	0	0	0	0	664	Bacteria{superkingdom}(100);Bacteroidetes{phylum}(100);Bacteroidia{class}(100);Bacteroidales{order}(100);Prevotellaceae{family}(100);Prevotella{genus}(100);Unassigned{species}(0)	Bacteria	Bacteroidetes	Bacteroidia	Bacteroidales	Prevotellaceae	Prevotella	Unassigned
ASV361	0	73	143	0	0	0	0	0	0	0	0	0	0	0	0	0	114	0	0	0	0	0	94	0	0	0	0	0	0	0	0	0	0	0	0	0	0	78	0	0	502	Bacteria{superkingdom}(100);Firmicutes{phylum}(100);Clostridia{class}(100);Clostridiales{order}(100);Lachnospiraceae{family}(100);Blautia{genus}(100);Unassigned{species}(0)	Bacteria	Firmicutes	Clostridia	Clostridiales	Lachnospiraceae	Blautia	Unassigned
ASV362	0	0	0	0	4	0	0	0	0	0	0	1706	0	0	0	0	0	0	0	0	0	0	0	0	0	0	0	0	0	0	0	558	0	0	0	0	0	0	0	0	2268	Bacteria{superkingdom}(81);Bacteroidetes{phylum}(81);Bacteroidia{class}(81);Bacteroidales{order}(81);Prevotellaceae{family}(81);{genus}(81);uncultured_bacterium{species}(81)	Bacteria	Bacteroidetes	Bacteroidia	Bacteroidales	Prevotellaceae		uncultured_bacterium
ASV363	0	0	50	0	0	0	10	0	0	0	0	0	0	0	0	0	0	0	0	0	0	0	0	0	0	0	3	0	0	0	0	0	12	0	0	800	0	0	0	0	875	Bacteria{superkingdom}(95);Bacteroidetes{phylum}(95);Bacteroidia{class}(95);Bacteroidales{order}(95);Bacteroidaceae{family}(95);Bacteroides{genus}(95);Bacteroides_plebeius{species}(95)	Bacteria	Bacteroidetes	Bacteroidia	Bacteroidales	Bacteroidaceae	Bacteroides	Bacteroides_plebeius
ASV364	0	183	0	0	0	9	0	6	0	0	0	8	0	0	7	0	0	0	9	25	46	0	15	0	0	10	0	11	0	0	40	0	0	6	0	34	0	13	31	13	466	Bacteria{superkingdom}(90);Firmicutes{phylum}(90);Clostridia{class}(90);Clostridiales{order}(90);Lachnospiraceae{family}(90);{genus}(90);Unassigned{species}(0)	Bacteria	Firmicutes	Clostridia	Clostridiales	Lachnospiraceae		Unassigned
ASV365	0	0	0	61	0	0	0	0	0	0	0	0	204	0	0	0	120	0	0	0	0	0	0	0	0	0	0	0	180	0	0	0	0	0	0	0	0	0	0	0	565	Bacteria{superkingdom}(99);Firmicutes{phylum}(99);Clostridia{class}(99);Clostridiales{order}(99);Peptostreptococcaceae{family}(99);Romboutsia{genus}(99);Unassigned{species}(0)	Bacteria	Firmicutes	Clostridia	Clostridiales	Peptostreptococcaceae	Romboutsia	Unassigned
ASV366	0	0	0	11	0	0	0	0	0	0	0	0	0	0	0	0	0	0	7	0	0	0	0	24	0	0	0	0	0	0	0	0	0	0	0	0	0	0	0	0	42	Bacteria{superkingdom}(94);Actinobacteria{phylum}(94);Actinobacteria{class}(94);Coriobacteriales{order}(94);Coriobacteriaceae{family}(94);Slackia{genus}(94);Slackia_isoflavoniconvertens{species}(94)	Bacteria	Actinobacteria	Actinobacteria	Coriobacteriales	Coriobacteriaceae	Slackia	Slackia_isoflavoniconvertens
ASV367	0	0	0	0	931	0	0	0	0	0	0	0	0	0	0	0	0	0	0	0	0	0	0	0	1134	0	0	0	0	0	0	0	0	0	0	0	0	0	0	0	2065	Bacteria{superkingdom}(100);Firmicutes{phylum}(100);Erysipelotrichia{class}(100);Erysipelotrichales{order}(100);Erysipelotrichaceae{family}(100);Holdemanella{genus}(100);Unassigned{species}(0)	Bacteria	Firmicutes	Erysipelotrichia	Erysipelotrichales	Erysipelotrichaceae	Holdemanella	Unassigned
ASV368	0	0	0	0	0	0	0	0	0	0	0	0	0	0	0	0	0	0	27	0	0	0	0	0	0	0	0	0	0	0	0	0	0	0	0	0	0	0	0	0	27	Bacteria{superkingdom}(100);Bacteroidetes{phylum}(100);Bacteroidia{class}(100);Bacteroidales{order}(100);Prevotellaceae{family}(100);Prevotella{genus}(100);Unassigned{species}(0)	Bacteria	Bacteroidetes	Bacteroidia	Bacteroidales	Prevotellaceae	Prevotella	Unassigned
ASV369	0	0	0	0	0	0	0	0	0	0	0	0	0	0	0	0	0	0	0	0	0	0	0	0	0	0	0	0	0	0	0	0	0	0	0	150	0	0	0	0	150	Bacteria{superkingdom}(100);Bacteroidetes{phylum}(100);Bacteroidia{class}(100);Bacteroidales{order}(100);Prevotellaceae{family}(100);Prevotella{genus}(100);Unassigned{species}(0)	Bacteria	Bacteroidetes	Bacteroidia	Bacteroidales	Prevotellaceae	Prevotella	Unassigned
ASV370	0	0	0	59	0	0	0	0	563	0	0	0	0	0	0	207	0	0	0	0	0	85	0	0	0	0	0	0	41	0	0	0	0	0	78	0	0	0	0	0	1033	Bacteria{superkingdom}(100);Proteobacteria{phylum}(100);Gammaproteobacteria{class}(100);Pasteurellales{order}(100);Pasteurellaceae{family}(100);Haemophilus{genus}(100);Unassigned{species}(0)	Bacteria	Proteobacteria	Gammaproteobacteria	Pasteurellales	Pasteurellaceae	Haemophilus	Unassigned
ASV371	0	0	0	0	0	0	0	0	0	0	0	0	0	0	0	0	0	0	0	21	0	0	0	0	0	0	0	30	0	0	0	0	0	0	0	0	0	0	0	0	51	Bacteria{superkingdom}(91);Bacteroidetes{phylum}(91);Bacteroidia{class}(91);Bacteroidales{order}(91);Bacteroidaceae{family}(91);Bacteroides{genus}(91);Bacteroides_vulgatus{species}(91)	Bacteria	Bacteroidetes	Bacteroidia	Bacteroidales	Bacteroidaceae	Bacteroides	Bacteroides_vulgatus
ASV372	0	0	0	167	0	0	0	0	0	0	0	0	0	0	0	0	0	0	0	0	0	0	0	7	0	0	0	0	0	0	0	0	0	0	0	574	0	0	0	0	748	Bacteria{superkingdom}(100);Bacteroidetes{phylum}(100);Bacteroidia{class}(100);Bacteroidales{order}(100);Prevotellaceae{family}(100);Prevotella{genus}(100);Unassigned{species}(0)	Bacteria	Bacteroidetes	Bacteroidia	Bacteroidales	Prevotellaceae	Prevotella	Unassigned
ASV373	0	0	0	86	9	135	0	0	11	19	3	0	0	34	0	0	2	6	0	0	0	21	0	47	333	0	4	81	0	0	21	0	257	9	0	0	7	3	0	0	1088	Bacteria{superkingdom}(100);Firmicutes{phylum}(100);Clostridia{class}(100);Clostridiales{order}(100);Ruminococcaceae{family}(100);Clostridium_IV{genus}(100);Clostridium_leptum{species}(100)	Bacteria	Firmicutes	Clostridia	Clostridiales	Ruminococcaceae	Clostridium_IV	Clostridium_leptum
ASV375	0	0	0	0	3	13	85	0	0	0	0	0	0	32	0	0	8	0	15	13	0	21	0	0	37	13	0	0	0	0	0	7	16	16	81	0	27	2	0	5	394	Bacteria{superkingdom}(100);Actinobacteria{phylum}(100);Actinobacteria{class}(100);Coriobacteriales{order}(100);Coriobacteriaceae{family}(100);{genus}(100);Unassigned{species}(0)	Bacteria	Actinobacteria	Actinobacteria	Coriobacteriales	Coriobacteriaceae		Unassigned
ASV376	0	0	0	0	0	1199	0	0	0	0	0	0	0	0	0	0	0	0	0	0	0	0	0	0	0	715	0	0	0	0	0	0	0	0	0	0	0	0	0	0	1914	Bacteria{superkingdom}(90);Firmicutes{phylum}(90);Clostridia{class}(90);Clostridiales{order}(90);Ruminococcaceae{family}(90);Gemmiger{genus}(90);Unassigned{species}(0)	Bacteria	Firmicutes	Clostridia	Clostridiales	Ruminococcaceae	Gemmiger	Unassigned
ASV377	43	10	0	17	16	4	0	37	8	0	19	8	0	26	0	35	15	23	21	24	25	16	0	13	7	25	0	81	16	13	0	8	15	0	19	14	14	25	0	22	619	Bacteria{superkingdom}(95);Firmicutes{phylum}(95);Clostridia{class}(95);Clostridiales{order}(95);Lachnospiraceae{family}(95);{genus}(95);Lachnospiraceae_bacterium_DJF_CP76{species}(95)	Bacteria	Firmicutes	Clostridia	Clostridiales	Lachnospiraceae		Lachnospiraceae_bacterium_DJF_CP76
ASV378	0	0	0	0	0	0	0	0	0	0	0	0	0	0	0	0	0	0	20	0	0	12	0	0	0	0	25	0	0	0	0	0	0	13	0	0	0	0	0	0	70	Bacteria{superkingdom}(100);Firmicutes{phylum}(100);Clostridia{class}(100);Clostridiales{order}(100);Ruminococcaceae{family}(100);{genus}(100);uncultured_bacterium_adhufec108{species}(100)	Bacteria	Firmicutes	Clostridia	Clostridiales	Ruminococcaceae		uncultured_bacterium_adhufec108
ASV380	0	0	0	0	0	11	0	0	0	0	0	11	0	26	0	0	0	0	0	0	0	0	0	0	0	7	0	0	11	137	0	0	0	95	14	0	0	19	0	0	331	Bacteria{superkingdom}(100);Firmicutes{phylum}(100);Clostridia{class}(100);Clostridiales{order}(100);Ruminococcaceae{family}(100);Oscillibacter{genus}(100);Unassigned{species}(0)	Bacteria	Firmicutes	Clostridia	Clostridiales	Ruminococcaceae	Oscillibacter	Unassigned
ASV381	0	82	0	0	0	0	0	0	0	13	0	0	19	225	0	0	0	0	151	0	81	0	0	0	0	0	0	0	0	64	0	0	0	16	0	0	0	0	0	0	651	Bacteria{superkingdom}(95);Bacteroidetes{phylum}(95);Bacteroidia{class}(95);Bacteroidales{order}(95);Porphyromonadaceae{family}(95);Parabacteroides{genus}(95);Parabacteroides_distasonis{species}(95)	Bacteria	Bacteroidetes	Bacteroidia	Bacteroidales	Porphyromonadaceae	Parabacteroides	Parabacteroides_distasonis
ASV382	585	307	0	0	0	0	0	0	0	0	0	0	0	0	0	0	0	0	0	0	207	0	0	0	0	0	0	0	0	0	0	0	0	0	0	0	0	0	0	0	1099	Bacteria{superkingdom}(100);Firmicutes{phylum}(100);Clostridia{class}(100);Clostridiales{order}(100);Lachnospiraceae{family}(100);Ruminococcus2{genus}(100);Unassigned{species}(0)	Bacteria	Firmicutes	Clostridia	Clostridiales	Lachnospiraceae	Ruminococcus2	Unassigned
ASV383	0	0	0	0	0	703	0	0	0	0	0	0	0	0	0	0	0	0	0	0	0	0	0	0	0	1139	0	0	0	0	0	0	0	0	0	0	0	0	0	0	1842	Bacteria{superkingdom}(100);Firmicutes{phylum}(100);Negativicutes{class}(100);Selenomonadales{order}(100);Veillonellaceae{family}(100);Dialister{genus}(100);Unassigned{species}(0)	Bacteria	Firmicutes	Negativicutes	Selenomonadales	Veillonellaceae	Dialister	Unassigned
ASV385	0	0	0	0	0	0	0	0	0	0	0	8	0	0	0	0	0	0	0	0	0	0	0	0	0	0	0	0	0	0	0	0	0	0	0	0	1	0	0	0	9	Bacteria{superkingdom}(98);Firmicutes{phylum}(98);Clostridia{class}(98);Clostridiales{order}(98);Ruminococcaceae{family}(98);Clostridium_IV{genus}(98);uncultured_Bacteroidetes_bacterium{species}(98)	Bacteria	Firmicutes	Clostridia	Clostridiales	Ruminococcaceae	Clostridium_IV	uncultured_Bacteroidetes_bacterium
ASV386	0	0	0	0	0	0	0	0	0	0	0	0	0	0	0	0	0	0	110	0	0	62	0	0	0	0	0	0	0	0	0	0	0	0	0	0	0	0	0	0	172	Bacteria{superkingdom}(92);Firmicutes{phylum}(92);Clostridia{class}(92);Clostridiales{order}(92);Ruminococcaceae{family}(92);Anaerobacterium{genus}(92);uncultured_bacterium{species}(92)	Bacteria	Firmicutes	Clostridia	Clostridiales	Ruminococcaceae	Anaerobacterium	uncultured_bacterium
ASV387	0	0	0	0	0	0	0	0	0	0	100	0	0	0	0	0	0	0	32	0	0	0	0	0	0	0	0	0	0	0	70	0	0	137	0	0	0	0	0	0	339	Bacteria{superkingdom}(100);Proteobacteria{phylum}(100);Deltaproteobacteria{class}(100);Desulfovibrionales{order}(100);Desulfovibrionaceae{family}(100);{genus}(100);uncultured_Desulfovibrio_sp.{species}(100)	Bacteria	Proteobacteria	Deltaproteobacteria	Desulfovibrionales	Desulfovibrionaceae		uncultured_Desulfovibrio_sp.
ASV388	0	0	0	0	0	0	10	0	0	0	0	0	0	0	0	0	0	0	0	0	0	0	0	0	0	0	1	0	0	0	0	0	0	0	0	0	0	0	0	0	11	Bacteria{superkingdom}(100);Bacteroidetes{phylum}(100);Bacteroidia{class}(100);Bacteroidales{order}(100);Prevotellaceae{family}(100);Prevotella{genus}(100);Unassigned{species}(0)	Bacteria	Bacteroidetes	Bacteroidia	Bacteroidales	Prevotellaceae	Prevotella	Unassigned
ASV390	0	0	0	0	0	0	0	0	0	0	0	0	0	0	0	0	30	0	0	0	0	22	0	0	0	0	0	0	0	0	0	0	12	0	0	135	70	101	0	0	370	Bacteria{superkingdom}(100);Bacteroidetes{phylum}(100);Bacteroidia{class}(100);Bacteroidales{order}(100);Porphyromonadaceae{family}(100);Butyricimonas{genus}(100);Unassigned{species}(0)	Bacteria	Bacteroidetes	Bacteroidia	Bacteroidales	Porphyromonadaceae	Butyricimonas	Unassigned
ASV392	0	0	0	0	0	0	0	0	0	0	0	0	0	0	0	0	0	11	0	0	0	0	22	0	0	0	0	0	0	0	0	0	0	0	0	0	0	61	0	0	94	Bacteria{superkingdom}(98);Bacteroidetes{phylum}(98);Bacteroidia{class}(98);Bacteroidales{order}(98);Bacteroidaceae{family}(98);Bacteroides{genus}(98);Bacteroides_massiliensis{species}(98)	Bacteria	Bacteroidetes	Bacteroidia	Bacteroidales	Bacteroidaceae	Bacteroides	Bacteroides_massiliensis
ASV393	0	0	0	0	0	0	0	0	0	0	0	46	0	0	0	0	27	0	0	0	0	0	0	0	0	0	4	0	0	0	0	0	9	0	0	0	0	92	0	0	178	Bacteria{superkingdom}(100);Firmicutes{phylum}(100);{class}(100);{order}(100);{family}(100);{genus}(100);uncultured_Bacteroidetes_bacterium{species}(100)	Bacteria	Firmicutes					uncultured_Bacteroidetes_bacterium
ASV395	0	0	0	0	0	0	0	0	0	0	0	0	0	0	0	0	0	0	6	0	0	0	0	0	0	0	0	0	0	0	0	0	0	0	0	0	0	0	0	0	6	Bacteria{superkingdom}(100);Bacteroidetes{phylum}(100);Bacteroidia{class}(100);Bacteroidales{order}(100);Prevotellaceae{family}(100);Prevotella{genus}(100);Unassigned{species}(0)	Bacteria	Bacteroidetes	Bacteroidia	Bacteroidales	Prevotellaceae	Prevotella	Unassigned
ASV396	0	41	0	0	0	22	0	0	0	0	12	0	0	0	0	0	0	0	67	0	0	0	0	0	0	105	0	0	0	0	238	0	0	82	0	0	0	0	0	0	567	Bacteria{superkingdom}(100);Firmicutes{phylum}(100);Clostridia{class}(100);Clostridiales{order}(100);Lachnospiraceae{family}(100);Roseburia{genus}(100);Unassigned{species}(0)	Bacteria	Firmicutes	Clostridia	Clostridiales	Lachnospiraceae	Roseburia	Unassigned
ASV397	758	0	0	0	0	0	0	0	0	0	0	0	0	0	0	337	0	0	0	0	0	0	0	0	0	0	0	0	0	0	0	0	0	0	0	0	0	0	0	0	1095	Bacteria{superkingdom}(100);Firmicutes{phylum}(100);Clostridia{class}(100);Clostridiales{order}(100);Lachnospiraceae{family}(100);Roseburia{genus}(100);Unassigned{species}(0)	Bacteria	Firmicutes	Clostridia	Clostridiales	Lachnospiraceae	Roseburia	Unassigned
ASV400	0	0	0	0	0	0	0	0	0	0	0	0	0	0	0	0	0	0	0	0	0	0	0	0	0	0	0	0	0	0	0	0	17	0	0	0	0	0	0	0	17	Bacteria{superkingdom}(81);Firmicutes{phylum}(81);Clostridia{class}(81);Clostridiales{order}(81);{family}(81);{genus}(81);uncultured_Firmicutes_bacterium{species}(81)	Bacteria	Firmicutes	Clostridia	Clostridiales			uncultured_Firmicutes_bacterium
ASV401	0	0	822	0	0	0	0	0	0	0	0	0	0	0	0	0	0	0	0	0	0	0	133	0	0	0	0	0	0	0	0	0	0	0	0	0	0	0	0	0	955	Bacteria{superkingdom}(100);Firmicutes{phylum}(100);Bacilli{class}(100);Lactobacillales{order}(100);Lactobacillaceae{family}(100);Lactobacillus{genus}(100);Unassigned{species}(0)	Bacteria	Firmicutes	Bacilli	Lactobacillales	Lactobacillaceae	Lactobacillus	Unassigned
ASV402	0	0	0	0	0	0	0	0	0	0	0	0	0	0	0	0	0	0	0	0	0	37	0	0	0	0	0	0	0	0	0	0	850	0	0	0	0	0	0	0	887	Bacteria{superkingdom}(100);Firmicutes{phylum}(100);Clostridia{class}(100);Clostridiales{order}(100);Ruminococcaceae{family}(100);Unassigned{genus}(0);Unassigned{species}(0)	Bacteria	Firmicutes	Clostridia	Clostridiales	Ruminococcaceae	Unassigned	Unassigned
ASV403	0	0	0	0	0	0	0	0	0	0	0	0	0	0	0	0	0	0	180	0	0	0	0	0	0	0	0	0	0	0	0	0	0	0	0	0	0	0	0	0	180	Bacteria{superkingdom}(87);Firmicutes{phylum}(87);Clostridia{class}(87);Clostridiales{order}(87);Ruminococcaceae{family}(87);Anaerobacterium{genus}(87);uncultured_rumen_bacterium{species}(87)	Bacteria	Firmicutes	Clostridia	Clostridiales	Ruminococcaceae	Anaerobacterium	uncultured_rumen_bacterium
ASV404	0	0	0	0	0	0	0	0	0	0	0	197	0	0	0	0	0	0	0	0	0	47	0	0	0	0	0	213	0	0	0	30	5	0	0	0	0	21	0	0	513	Bacteria{superkingdom}(92);Bacteroidetes{phylum}(92);Bacteroidia{class}(92);Bacteroidales{order}(92);Bacteroidaceae{family}(92);Bacteroides{genus}(92);Bacteroides_uniformis{species}(92)	Bacteria	Bacteroidetes	Bacteroidia	Bacteroidales	Bacteroidaceae	Bacteroides	Bacteroides_uniformis
ASV407	0	0	0	125	2	0	0	0	0	0	0	915	0	0	0	0	0	0	0	0	0	0	0	103	0	0	0	0	0	0	0	931	63	0	0	0	0	0	0	0	2139	Bacteria{superkingdom}(97);Bacteroidetes{phylum}(97);Bacteroidia{class}(97);Bacteroidales{order}(97);Bacteroidaceae{family}(97);Bacteroides{genus}(97);Bacteroides_coprophilus{species}(97)	Bacteria	Bacteroidetes	Bacteroidia	Bacteroidales	Bacteroidaceae	Bacteroides	Bacteroides_coprophilus
ASV409	0	0	0	0	0	0	0	0	0	0	0	0	0	0	0	0	0	0	0	0	0	0	61	0	0	0	0	0	0	0	92	0	0	0	0	0	0	0	0	0	153	Bacteria{superkingdom}(99);Bacteroidetes{phylum}(99);Bacteroidia{class}(99);Bacteroidales{order}(99);Bacteroidaceae{family}(99);Bacteroides{genus}(99);Bacteroides_massiliensis{species}(99)	Bacteria	Bacteroidetes	Bacteroidia	Bacteroidales	Bacteroidaceae	Bacteroides	Bacteroides_massiliensis
ASV411	0	0	0	0	0	0	106	0	0	0	13	0	0	0	0	0	0	0	0	0	0	0	0	0	0	0	0	0	0	0	0	0	0	0	0	0	0	6	0	0	125	Bacteria{superkingdom}(100);Firmicutes{phylum}(100);Bacilli{class}(100);Lactobacillales{order}(100);Lactobacillaceae{family}(100);Lactobacillus{genus}(100);Unassigned{species}(0)	Bacteria	Firmicutes	Bacilli	Lactobacillales	Lactobacillaceae	Lactobacillus	Unassigned
ASV413	0	0	0	0	0	0	0	0	0	0	0	0	0	0	0	0	0	0	0	647	0	0	0	0	0	0	0	0	0	0	0	0	0	0	0	0	0	0	0	1265	1912	Bacteria{superkingdom}(96);Firmicutes{phylum}(96);Clostridia{class}(96);Clostridiales{order}(96);Lachnospiraceae{family}(96);Lachnospiracea_incertae_sedis{genus}(96);Unassigned{species}(0)	Bacteria	Firmicutes	Clostridia	Clostridiales	Lachnospiraceae	Lachnospiracea_incertae_sedis	Unassigned
ASV415	0	0	0	0	0	0	0	0	0	0	0	37	0	0	0	0	44	21	0	0	0	1	0	0	0	0	30	0	0	0	0	30	37	0	0	127	0	165	0	0	492	Bacteria{superkingdom}(100);Bacteroidetes{phylum}(100);Bacteroidia{class}(100);Bacteroidales{order}(100);Porphyromonadaceae{family}(100);Parabacteroides{genus}(100);Unassigned{species}(0)	Bacteria	Bacteroidetes	Bacteroidia	Bacteroidales	Porphyromonadaceae	Parabacteroides	Unassigned
ASV416	0	0	0	0	0	0	0	0	0	0	0	0	0	0	0	0	0	0	0	0	0	11	0	0	0	0	0	0	0	0	0	0	0	0	0	0	0	0	0	0	11	Bacteria{superkingdom}(100);Firmicutes{phylum}(100);Negativicutes{class}(100);Selenomonadales{order}(100);Veillonellaceae{family}(100);Megasphaera{genus}(100);Unassigned{species}(0)	Bacteria	Firmicutes	Negativicutes	Selenomonadales	Veillonellaceae	Megasphaera	Unassigned
ASV417	0	0	0	0	0	0	0	0	0	0	0	0	0	0	0	66	0	0	0	0	0	0	0	0	0	0	0	0	0	0	0	0	0	0	0	0	891	0	0	0	957	Bacteria{superkingdom}(100);Bacteroidetes{phylum}(100);Bacteroidia{class}(100);Bacteroidales{order}(100);Bacteroidaceae{family}(100);Bacteroides{genus}(100);Unassigned{species}(0)	Bacteria	Bacteroidetes	Bacteroidia	Bacteroidales	Bacteroidaceae	Bacteroides	Unassigned
ASV418	0	0	0	0	0	97	0	0	0	0	0	0	0	0	0	0	0	64	51	0	0	0	0	27	0	70	12	0	65	0	0	0	43	0	0	121	0	0	0	0	550	Bacteria{superkingdom}(100);Bacteroidetes{phylum}(100);Bacteroidia{class}(100);Bacteroidales{order}(100);Bacteroidaceae{family}(100);Bacteroides{genus}(100);Unassigned{species}(0)	Bacteria	Bacteroidetes	Bacteroidia	Bacteroidales	Bacteroidaceae	Bacteroides	Unassigned
ASV421	0	0	0	0	0	0	0	0	0	0	0	260	0	0	0	0	0	27	0	0	0	5	0	0	0	5	0	0	47	0	0	180	0	0	9	0	0	0	0	0	533	Bacteria{superkingdom}(100);Firmicutes{phylum}(100);Clostridia{class}(100);Clostridiales{order}(100);Lachnospiraceae{family}(100);Unassigned{genus}(0);Unassigned{species}(0)	Bacteria	Firmicutes	Clostridia	Clostridiales	Lachnospiraceae	Unassigned	Unassigned
ASV422	0	0	0	0	0	16	26	0	0	0	0	13	0	0	0	0	0	9	92	0	0	0	0	7	0	9	67	0	0	0	109	77	23	5	0	0	68	11	0	0	532	Bacteria{superkingdom}(99);Firmicutes{phylum}(99);Clostridia{class}(99);Clostridiales{order}(99);{family}(99);{genus}(99);uncultured_Christensenellaceae_bacterium{species}(99)	Bacteria	Firmicutes	Clostridia	Clostridiales			uncultured_Christensenellaceae_bacterium
ASV424	0	0	0	79	0	19	0	0	0	0	0	0	0	0	0	0	0	0	0	0	0	0	0	44	0	53	0	0	0	0	0	0	0	0	0	28	0	0	0	0	223	Bacteria{superkingdom}(100);Firmicutes{phylum}(100);Clostridia{class}(100);Clostridiales{order}(100);Ruminococcaceae{family}(100);Butyricicoccus{genus}(100);Unassigned{species}(0)	Bacteria	Firmicutes	Clostridia	Clostridiales	Ruminococcaceae	Butyricicoccus	Unassigned
ASV425	0	0	0	18	0	0	28	0	21	47	0	0	0	0	24	0	10	0	0	0	0	0	0	0	0	0	0	0	0	42	0	0	8	48	0	0	0	0	0	0	246	Bacteria{superkingdom}(86);Firmicutes{phylum}(86);Bacilli{class}(86);Lactobacillales{order}(86);Streptococcaceae{family}(86);Streptococcus{genus}(86);Streptococcus_anginosus{species}(86)	Bacteria	Firmicutes	Bacilli	Lactobacillales	Streptococcaceae	Streptococcus	Streptococcus_anginosus
ASV426	0	0	0	0	26	0	0	0	0	0	0	0	31	0	0	10	38	0	0	0	0	0	0	0	0	0	0	0	0	0	0	0	0	8	309	0	0	0	0	0	422	Bacteria{superkingdom}(93);Proteobacteria{phylum}(93);Gammaproteobacteria{class}(93);Enterobacteriales{order}(93);Enterobacteriaceae{family}(93);Citrobacter{genus}(93);Unassigned{species}(0)	Bacteria	Proteobacteria	Gammaproteobacteria	Enterobacteriales	Enterobacteriaceae	Citrobacter	Unassigned
ASV427	0	436	0	0	0	0	0	0	0	0	0	0	0	0	0	0	0	0	0	0	1254	0	0	0	0	0	0	0	0	0	0	0	0	0	0	0	0	0	0	0	1690	Bacteria{superkingdom}(100);Firmicutes{phylum}(100);Bacilli{class}(100);Lactobacillales{order}(100);Streptococcaceae{family}(100);Streptococcus{genus}(100);Unassigned{species}(0)	Bacteria	Firmicutes	Bacilli	Lactobacillales	Streptococcaceae	Streptococcus	Unassigned
ASV428	24	0	0	17	28	49	133	0	0	46	4	6	0	0	0	3	18	0	10	9	0	13	0	0	42	32	34	0	0	19	14	0	0	27	0	0	20	21	0	18	587	Bacteria{superkingdom}(85);Firmicutes{phylum}(85);Clostridia{class}(85);Clostridiales{order}(85);Clostridiales_Incertae_Sedis_XIII{family}(85);Anaerovorax{genus}(85);uncultured_bacterium{species}(85)	Bacteria	Firmicutes	Clostridia	Clostridiales	Clostridiales_Incertae_Sedis_XIII	Anaerovorax	uncultured_bacterium
ASV429	0	118	0	0	0	0	0	384	0	0	33	0	0	0	84	0	27	0	64	141	59	0	0	0	0	0	0	170	0	0	0	0	0	0	0	0	0	0	0	152	1232	Bacteria{superkingdom}(100);Firmicutes{phylum}(100);Clostridia{class}(100);Clostridiales{order}(100);Ruminococcaceae{family}(100);Butyricicoccus{genus}(100);Unassigned{species}(0)	Bacteria	Firmicutes	Clostridia	Clostridiales	Ruminococcaceae	Butyricicoccus	Unassigned
ASV430	0	0	0	0	0	7	0	0	0	0	0	0	0	981	0	0	0	0	0	0	0	43	0	0	0	9	0	0	0	0	123	0	0	0	32	0	0	0	0	0	1195	Bacteria{superkingdom}(88);Bacteroidetes{phylum}(88);Bacteroidia{class}(88);Bacteroidales{order}(88);Bacteroidaceae{family}(88);Bacteroides{genus}(88);Bacteroides_eggerthii{species}(88)	Bacteria	Bacteroidetes	Bacteroidia	Bacteroidales	Bacteroidaceae	Bacteroides	Bacteroides_eggerthii
ASV431	0	0	0	0	0	0	0	0	0	0	0	0	0	0	0	0	0	0	0	0	0	26	10	0	0	0	0	0	0	0	0	0	0	0	0	0	0	0	0	0	36	Bacteria{superkingdom}(98);Bacteroidetes{phylum}(98);Bacteroidia{class}(98);Bacteroidales{order}(98);Bacteroidaceae{family}(98);Bacteroides{genus}(98);Bacteroides_finegoldii{species}(98)	Bacteria	Bacteroidetes	Bacteroidia	Bacteroidales	Bacteroidaceae	Bacteroides	Bacteroides_finegoldii
ASV432	0	0	0	0	0	0	0	0	0	0	0	0	0	0	1462	0	0	0	71	0	0	0	0	0	0	0	0	0	0	0	0	0	0	0	0	0	0	0	0	0	1533	Bacteria{superkingdom}(100);Actinobacteria{phylum}(100);Actinobacteria{class}(100);Coriobacteriales{order}(100);Coriobacteriaceae{family}(100);Collinsella{genus}(100);Unassigned{species}(0)	Bacteria	Actinobacteria	Actinobacteria	Coriobacteriales	Coriobacteriaceae	Collinsella	Unassigned
ASV433	78	15	0	4	18	0	0	141	0	3	0	0	15	0	76	0	0	30	0	10	27	0	0	0	31	0	0	90	28	11	12	0	0	0	0	60	6	0	19	20	694	Bacteria{superkingdom}(100);Actinobacteria{phylum}(100);Actinobacteria{class}(100);Coriobacteriales{order}(100);Coriobacteriaceae{family}(100);Eggerthella{genus}(100);Unassigned{species}(0)	Bacteria	Actinobacteria	Actinobacteria	Coriobacteriales	Coriobacteriaceae	Eggerthella	Unassigned
ASV434	0	27	0	27	0	0	0	36	0	0	0	13	0	0	0	0	0	0	0	0	9	0	0	82	0	0	0	51	0	0	63	49	0	0	0	0	0	0	0	0	357	Bacteria{superkingdom}(91);Firmicutes{phylum}(91);Negativicutes{class}(91);Selenomonadales{order}(91);Veillonellaceae{family}(91);Allisonella{genus}(91);uncultured_bacterium{species}(91)	Bacteria	Firmicutes	Negativicutes	Selenomonadales	Veillonellaceae	Allisonella	uncultured_bacterium
ASV435	0	0	0	0	0	0	0	0	0	0	0	0	0	0	0	0	0	0	0	0	0	20	0	0	0	0	0	0	0	0	0	0	84	0	0	0	0	0	0	0	104	Bacteria{superkingdom}(99);Firmicutes{phylum}(99);Clostridia{class}(99);Clostridiales{order}(99);Ruminococcaceae{family}(99);{genus}(99);Clostridiaceae_bacterium_DJF_VR76{species}(99)	Bacteria	Firmicutes	Clostridia	Clostridiales	Ruminococcaceae		Clostridiaceae_bacterium_DJF_VR76
ASV436	0	0	0	0	0	0	0	0	0	0	0	0	0	9	0	0	0	0	118	0	0	0	0	0	0	0	0	0	62	0	0	0	56	0	0	0	0	0	0	0	245	Bacteria{superkingdom}(99);Bacteroidetes{phylum}(99);Bacteroidia{class}(99);Bacteroidales{order}(99);Bacteroidaceae{family}(99);Bacteroides{genus}(99);Bacteroides_salyersiae{species}(99)	Bacteria	Bacteroidetes	Bacteroidia	Bacteroidales	Bacteroidaceae	Bacteroides	Bacteroides_salyersiae
ASV438	0	0	0	5	0	0	0	0	0	0	0	0	0	0	0	0	3	0	0	0	0	0	0	0	0	0	0	0	0	0	0	0	0	0	0	0	0	4	0	0	12	Bacteria{superkingdom}(100);Firmicutes{phylum}(100);Erysipelotrichia{class}(100);Erysipelotrichales{order}(100);Erysipelotrichaceae{family}(100);Holdemanella{genus}(100);Unassigned{species}(0)	Bacteria	Firmicutes	Erysipelotrichia	Erysipelotrichales	Erysipelotrichaceae	Holdemanella	Unassigned
ASV439	0	0	0	0	0	0	13	0	0	0	0	0	0	0	0	0	0	0	0	0	0	0	0	0	0	0	0	0	0	0	0	0	0	0	0	0	0	0	0	0	13	Bacteria{superkingdom}(100);Bacteroidetes{phylum}(100);Bacteroidia{class}(100);Bacteroidales{order}(100);Prevotellaceae{family}(100);Prevotella{genus}(100);Unassigned{species}(0)	Bacteria	Bacteroidetes	Bacteroidia	Bacteroidales	Prevotellaceae	Prevotella	Unassigned
ASV441	0	0	8	0	33	0	0	0	0	12	13	0	0	33	0	155	26	0	0	0	0	0	27	0	0	0	0	0	0	0	0	0	0	0	0	0	0	0	0	0	307	Bacteria{superkingdom}(89);Proteobacteria{phylum}(89);Gammaproteobacteria{class}(89);Enterobacteriales{order}(89);Enterobacteriaceae{family}(89);Enterobacter{genus}(89);Unassigned{species}(0)	Bacteria	Proteobacteria	Gammaproteobacteria	Enterobacteriales	Enterobacteriaceae	Enterobacter	Unassigned
ASV442	0	0	0	0	0	0	0	0	0	0	0	0	0	2	0	0	0	0	0	0	0	0	0	0	0	0	0	0	0	0	0	0	0	0	0	0	0	0	0	0	2	Bacteria{superkingdom}(100);Firmicutes{phylum}(100);Bacilli{class}(100);Lactobacillales{order}(100);Lactobacillaceae{family}(100);Lactobacillus{genus}(100);Lactobacillus_delbrueckii{species}(100)	Bacteria	Firmicutes	Bacilli	Lactobacillales	Lactobacillaceae	Lactobacillus	Lactobacillus_delbrueckii
ASV445	0	46	0	0	0	0	0	0	0	5	0	0	8	13	31	5	0	29	0	0	31	0	0	10	2	0	0	29	0	42	0	0	0	0	36	0	1	0	30	0	318	Bacteria{superkingdom}(100);Firmicutes{phylum}(100);Erysipelotrichia{class}(100);Erysipelotrichales{order}(100);Erysipelotrichaceae{family}(100);Erysipelotrichaceae_incertae_sedis{genus}(100);Unassigned{species}(0)	Bacteria	Firmicutes	Erysipelotrichia	Erysipelotrichales	Erysipelotrichaceae	Erysipelotrichaceae_incertae_sedis	Unassigned
ASV446	0	0	0	0	0	0	1326	0	0	0	0	0	0	0	0	0	0	0	0	0	0	0	0	0	0	0	531	0	0	0	0	0	0	0	0	0	0	0	0	0	1857	Bacteria{superkingdom}(97);Firmicutes{phylum}(97);Clostridia{class}(97);Clostridiales{order}(97);Lachnospiraceae{family}(97);Lachnospiracea_incertae_sedis{genus}(97);Unassigned{species}(0)	Bacteria	Firmicutes	Clostridia	Clostridiales	Lachnospiraceae	Lachnospiracea_incertae_sedis	Unassigned
ASV449	418	0	7	0	0	0	0	0	0	0	0	0	0	0	0	0	0	0	0	0	0	0	0	0	0	0	0	0	0	0	0	0	0	2	0	0	0	0	0	0	427	Bacteria{superkingdom}(98);Bacteroidetes{phylum}(98);Bacteroidia{class}(98);Bacteroidales{order}(98);Bacteroidaceae{family}(98);Bacteroides{genus}(98);Bacteroides_ovatus{species}(98)	Bacteria	Bacteroidetes	Bacteroidia	Bacteroidales	Bacteroidaceae	Bacteroides	Bacteroides_ovatus
ASV450	0	0	0	0	0	0	0	0	41	11	0	0	0	0	0	0	71	0	0	17	0	0	11	0	0	0	0	0	0	0	0	0	0	0	0	0	0	0	0	0	151	Bacteria{superkingdom}(85);Proteobacteria{phylum}(85);Gammaproteobacteria{class}(85);Enterobacteriales{order}(85);Enterobacteriaceae{family}(85);Enterobacter{genus}(85);Unassigned{species}(0)	Bacteria	Proteobacteria	Gammaproteobacteria	Enterobacteriales	Enterobacteriaceae	Enterobacter	Unassigned
ASV451	0	0	0	0	0	0	0	0	0	0	0	0	0	0	0	0	0	0	0	0	0	0	0	0	0	7	0	0	0	0	0	0	1699	0	0	0	0	0	0	0	1706	Bacteria{superkingdom}(100);Firmicutes{phylum}(100);{class}(100);{order}(100);{family}(100);{genus}(100);uncultured_Bacteroidetes_bacterium{species}(100)	Bacteria	Firmicutes					uncultured_Bacteroidetes_bacterium
ASV452	0	0	0	0	0	36	0	67	0	0	0	0	0	0	0	0	0	0	0	0	0	182	0	0	0	38	0	54	0	0	0	0	0	0	0	0	0	0	0	0	377	Bacteria{superkingdom}(100);Firmicutes{phylum}(100);Clostridia{class}(100);Clostridiales{order}(100);Lachnospiraceae{family}(100);Blautia{genus}(100);Unassigned{species}(0)	Bacteria	Firmicutes	Clostridia	Clostridiales	Lachnospiraceae	Blautia	Unassigned
ASV453	0	0	0	0	0	0	0	0	0	0	0	0	0	0	0	0	0	0	0	0	0	49	0	0	0	0	0	0	0	0	0	0	18	0	0	0	0	20	0	58	145	Bacteria{superkingdom}(94);Firmicutes{phylum}(94);Clostridia{class}(94);Clostridiales{order}(94);Lachnospiraceae{family}(94);Ruminococcus2{genus}(94);Unassigned{species}(0)	Bacteria	Firmicutes	Clostridia	Clostridiales	Lachnospiraceae	Ruminococcus2	Unassigned
ASV454	0	299	0	0	0	0	0	0	0	0	0	0	0	39	16	0	0	0	0	0	198	0	0	0	0	0	0	224	0	0	0	0	0	0	12	0	0	0	0	0	788	Bacteria{superkingdom}(100);Firmicutes{phylum}(100);Clostridia{class}(100);Clostridiales{order}(100);Ruminococcaceae{family}(100);Flavonifractor{genus}(100);Unassigned{species}(0)	Bacteria	Firmicutes	Clostridia	Clostridiales	Ruminococcaceae	Flavonifractor	Unassigned
ASV455	0	0	0	0	0	0	14	0	0	0	0	0	0	0	0	0	0	0	0	0	0	62	0	0	0	0	26	0	17	10	37	0	0	0	0	38	0	31	0	0	235	Bacteria{superkingdom}(90);Firmicutes{phylum}(90);Clostridia{class}(90);Clostridiales{order}(90);Lachnospiraceae{family}(90);Lachnospiracea_incertae_sedis{genus}(90);Eubacterium_eligens_ATCC_27750{species}(90)	Bacteria	Firmicutes	Clostridia	Clostridiales	Lachnospiraceae	Lachnospiracea_incertae_sedis	Eubacterium_eligens_ATCC_27750
ASV456	0	0	16	0	0	34	0	0	0	0	0	0	54	0	19	0	0	0	0	0	5	0	43	0	0	105	0	0	0	0	0	0	0	7	0	0	0	0	0	0	283	Bacteria{superkingdom}(100);Firmicutes{phylum}(100);Clostridia{class}(100);Clostridiales{order}(100);Clostridiaceae_1{family}(100);Clostridium_sensu_stricto{genus}(100);Unassigned{species}(0)	Bacteria	Firmicutes	Clostridia	Clostridiales	Clostridiaceae_1	Clostridium_sensu_stricto	Unassigned
ASV457	0	0	102	0	0	0	0	201	151	0	0	0	0	0	0	0	0	0	0	0	0	47	0	0	0	0	0	119	30	0	0	0	0	0	0	0	0	0	0	0	650	Bacteria{superkingdom}(100);Proteobacteria{phylum}(100);Gammaproteobacteria{class}(100);Enterobacteriales{order}(100);Enterobacteriaceae{family}(100);Escherichia/Shigella{genus}(100);Unassigned{species}(0)	Bacteria	Proteobacteria	Gammaproteobacteria	Enterobacteriales	Enterobacteriaceae	Escherichia/Shigella	Unassigned
ASV458	132	171	0	0	0	0	0	0	51	0	0	27	0	0	0	0	0	51	0	62	81	0	0	0	0	0	0	0	32	0	12	38	0	0	0	0	0	0	0	92	749	Bacteria{superkingdom}(100);Firmicutes{phylum}(100);Clostridia{class}(100);Clostridiales{order}(100);Lachnospiraceae{family}(100);Blautia{genus}(100);Unassigned{species}(0)	Bacteria	Firmicutes	Clostridia	Clostridiales	Lachnospiraceae	Blautia	Unassigned
ASV459	0	0	0	0	0	0	0	0	0	11	0	0	0	0	0	0	23	31	182	0	0	0	0	0	0	0	0	0	0	15	0	0	0	42	0	0	16	0	0	0	320	Bacteria{superkingdom}(100);Firmicutes{phylum}(100);Clostridia{class}(100);Clostridiales{order}(100);Ruminococcaceae{family}(100);Oscillibacter{genus}(100);Unassigned{species}(0)	Bacteria	Firmicutes	Clostridia	Clostridiales	Ruminococcaceae	Oscillibacter	Unassigned
ASV460	0	0	0	0	0	0	0	0	0	0	0	1	0	0	0	0	0	0	24	0	0	0	0	0	0	0	0	0	0	0	0	0	16	0	0	0	0	0	0	0	41	Bacteria{superkingdom}(100);Firmicutes{phylum}(100);Clostridia{class}(100);Clostridiales{order}(100);Unassigned{family}(0);Unassigned{genus}(0);Unassigned{species}(0)	Bacteria	Firmicutes	Clostridia	Clostridiales	Unassigned	Unassigned	Unassigned
ASV461	0	0	0	0	0	0	0	0	0	0	0	0	0	0	0	0	0	0	0	0	0	0	0	0	0	0	0	0	0	0	0	0	0	0	89	0	0	0	0	0	89	Bacteria{superkingdom}(100);Proteobacteria{phylum}(100);Gammaproteobacteria{class}(100);Enterobacteriales{order}(100);Enterobacteriaceae{family}(100);Escherichia/Shigella{genus}(100);Unassigned{species}(0)	Bacteria	Proteobacteria	Gammaproteobacteria	Enterobacteriales	Enterobacteriaceae	Escherichia/Shigella	Unassigned
ASV463	0	0	0	0	0	0	0	0	0	0	0	0	0	0	0	0	62	0	0	0	0	0	0	43	0	0	0	0	0	0	0	0	0	0	0	0	0	12	0	0	117	Bacteria{superkingdom}(99);Actinobacteria{phylum}(99);Actinobacteria{class}(99);Coriobacteriales{order}(99);Coriobacteriaceae{family}(99);Senegalimassilia{genus}(99);uncultured_bacterium{species}(99)	Bacteria	Actinobacteria	Actinobacteria	Coriobacteriales	Coriobacteriaceae	Senegalimassilia	uncultured_bacterium
ASV464	0	0	690	0	0	0	0	0	0	0	0	0	0	0	0	0	0	0	0	0	0	0	115	0	0	0	0	0	0	0	0	0	0	0	0	0	0	0	0	0	805	Bacteria{superkingdom}(88);Firmicutes{phylum}(88);Bacilli{class}(88);Lactobacillales{order}(88);Lactobacillaceae{family}(88);Lactobacillus{genus}(88);Lactobacillus_ruminis{species}(88)	Bacteria	Firmicutes	Bacilli	Lactobacillales	Lactobacillaceae	Lactobacillus	Lactobacillus_ruminis
ASV465	10	0	14	13	23	0	30	5	0	40	0	4	10	6	0	7	21	0	0	0	7	0	7	9	31	9	0	0	0	8	0	0	8	0	26	0	0	0	11	0	299	Bacteria{superkingdom}(100);Firmicutes{phylum}(100);Bacilli{class}(100);Lactobacillales{order}(100);Carnobacteriaceae{family}(100);Granulicatella{genus}(100);Unassigned{species}(0)	Bacteria	Firmicutes	Bacilli	Lactobacillales	Carnobacteriaceae	Granulicatella	Unassigned
ASV467	0	0	0	0	0	0	0	0	0	0	1058	0	0	0	0	0	0	0	0	0	0	0	0	0	0	0	0	0	0	0	74	0	0	0	0	0	0	0	0	0	1132	Bacteria{superkingdom}(100);Firmicutes{phylum}(100);Negativicutes{class}(100);Selenomonadales{order}(100);Veillonellaceae{family}(100);Megasphaera{genus}(100);Unassigned{species}(0)	Bacteria	Firmicutes	Negativicutes	Selenomonadales	Veillonellaceae	Megasphaera	Unassigned
ASV469	0	0	34	0	0	0	0	0	0	0	0	0	0	17	0	0	0	0	0	0	0	0	305	0	0	0	0	0	0	0	0	0	0	0	0	0	18	0	0	0	374	Bacteria{superkingdom}(100);Firmicutes{phylum}(100);Negativicutes{class}(100);Selenomonadales{order}(100);Veillonellaceae{family}(100);Veillonella{genus}(100);Unassigned{species}(0)	Bacteria	Firmicutes	Negativicutes	Selenomonadales	Veillonellaceae	Veillonella	Unassigned
ASV472	0	0	0	0	0	0	0	0	0	0	0	0	0	113	0	0	0	0	0	0	0	0	0	0	0	0	0	0	0	0	0	0	0	0	101	0	0	0	0	0	214	Bacteria{superkingdom}(100);Bacteroidetes{phylum}(100);Bacteroidia{class}(100);Bacteroidales{order}(100);Prevotellaceae{family}(100);Prevotella{genus}(100);Unassigned{species}(0)	Bacteria	Bacteroidetes	Bacteroidia	Bacteroidales	Prevotellaceae	Prevotella	Unassigned
ASV474	0	0	0	0	0	0	0	0	0	0	0	17	0	0	0	52	49	0	0	0	0	0	0	0	0	0	0	0	16	0	0	33	0	0	0	0	28	16	0	0	211	Bacteria{superkingdom}(100);Firmicutes{phylum}(100);Clostridia{class}(100);Clostridiales{order}(100);Ruminococcaceae{family}(100);Clostridium_IV{genus}(100);Unassigned{species}(0)	Bacteria	Firmicutes	Clostridia	Clostridiales	Ruminococcaceae	Clostridium_IV	Unassigned
ASV475	0	0	0	0	0	0	392	153	0	0	0	0	0	0	0	0	0	0	0	0	0	0	0	0	0	0	36	592	0	0	0	0	0	0	0	0	0	0	0	0	1173	Bacteria{superkingdom}(99);Firmicutes{phylum}(99);Clostridia{class}(99);Clostridiales{order}(99);Ruminococcaceae{family}(99);{genus}(99);Unassigned{species}(0)	Bacteria	Firmicutes	Clostridia	Clostridiales	Ruminococcaceae		Unassigned
ASV476	0	15	0	0	0	11	0	0	68	0	32	2	0	29	0	107	31	0	0	0	26	101	9	0	0	20	0	0	0	0	17	10	0	0	87	14	34	0	4	0	617	Bacteria{superkingdom}(100);Firmicutes{phylum}(100);Bacilli{class}(100);Lactobacillales{order}(100);Streptococcaceae{family}(100);Streptococcus{genus}(100);Unassigned{species}(0)	Bacteria	Firmicutes	Bacilli	Lactobacillales	Streptococcaceae	Streptococcus	Unassigned
ASV477	81	0	0	0	61	6	0	90	0	73	0	0	0	0	0	0	1	0	0	0	0	2	0	1	71	5	0	0	0	42	0	0	13	2	0	2	0	0	0	0	450	Bacteria{superkingdom}(100);Firmicutes{phylum}(100);Clostridia{class}(100);Clostridiales{order}(100);Lachnospiraceae{family}(100);Blautia{genus}(100);Unassigned{species}(0)	Bacteria	Firmicutes	Clostridia	Clostridiales	Lachnospiraceae	Blautia	Unassigned
ASV478	0	0	0	0	0	0	0	0	0	0	0	0	0	0	0	169	0	0	0	0	0	0	0	0	0	0	0	0	0	0	0	0	0	0	0	0	37	0	0	0	206	Bacteria{superkingdom}(95);Firmicutes{phylum}(95);Erysipelotrichia{class}(95);Erysipelotrichales{order}(95);Erysipelotrichaceae{family}(95);Clostridium_XVIII{genus}(95);Unassigned{species}(0)	Bacteria	Firmicutes	Erysipelotrichia	Erysipelotrichales	Erysipelotrichaceae	Clostridium_XVIII	Unassigned
ASV479	0	0	0	0	0	0	0	0	0	17	0	0	0	0	0	36	0	0	0	0	0	0	0	0	0	0	0	0	0	0	0	0	0	0	0	0	10	0	0	0	63	Bacteria{superkingdom}(100);Firmicutes{phylum}(100);Bacilli{class}(100);Lactobacillales{order}(100);Streptococcaceae{family}(100);Streptococcus{genus}(100);Unassigned{species}(0)	Bacteria	Firmicutes	Bacilli	Lactobacillales	Streptococcaceae	Streptococcus	Unassigned
ASV480	0	0	0	0	0	0	0	0	0	0	0	0	0	0	0	0	0	0	0	0	0	22	0	0	0	0	0	0	0	0	0	0	0	0	0	0	0	0	0	0	22	Bacteria{superkingdom}(100);Bacteroidetes{phylum}(100);Bacteroidia{class}(100);Bacteroidales{order}(100);Porphyromonadaceae{family}(100);Coprobacter{genus}(100);uncultured_organism{species}(100)	Bacteria	Bacteroidetes	Bacteroidia	Bacteroidales	Porphyromonadaceae	Coprobacter	uncultured_organism
ASV481	0	0	0	0	0	0	0	0	0	0	0	0	0	0	0	0	0	0	33	0	0	0	0	0	0	0	0	0	0	0	0	0	0	0	0	0	0	0	0	0	33	Bacteria{superkingdom}(100);Bacteroidetes{phylum}(100);Bacteroidia{class}(100);Bacteroidales{order}(100);Prevotellaceae{family}(100);Prevotella{genus}(100);Unassigned{species}(0)	Bacteria	Bacteroidetes	Bacteroidia	Bacteroidales	Prevotellaceae	Prevotella	Unassigned
ASV482	0	0	0	16	0	0	17	0	0	0	0	0	0	0	0	0	0	0	9	0	0	0	0	55	0	0	9	0	0	0	0	0	0	0	0	0	0	0	0	9	115	Bacteria{superkingdom}(88);Firmicutes{phylum}(88);Clostridia{class}(88);Clostridiales{order}(88);Lachnospiraceae{family}(88);Lachnospiracea_incertae_sedis{genus}(88);uncultured_Clostridiales_bacterium{species}(88)	Bacteria	Firmicutes	Clostridia	Clostridiales	Lachnospiraceae	Lachnospiracea_incertae_sedis	uncultured_Clostridiales_bacterium
ASV483	0	134	0	0	0	0	0	0	0	0	0	0	8	0	0	0	0	0	0	0	138	0	20	0	0	0	0	0	0	0	0	0	0	0	0	0	0	0	0	0	300	Bacteria{superkingdom}(98);Firmicutes{phylum}(98);Clostridia{class}(98);Clostridiales{order}(98);Lachnospiraceae{family}(98);Clostridium_XlVa{genus}(98);Unassigned{species}(0)	Bacteria	Firmicutes	Clostridia	Clostridiales	Lachnospiraceae	Clostridium_XlVa	Unassigned
ASV484	0	0	0	0	0	0	0	0	0	0	0	0	0	0	0	0	0	0	0	0	0	0	0	0	0	0	0	0	0	0	0	0	63	0	0	0	0	0	0	0	63	Bacteria{superkingdom}(100);Firmicutes{phylum}(100);Negativicutes{class}(100);Selenomonadales{order}(100);Acidaminococcaceae{family}(100);Phascolarctobacterium{genus}(100);Unassigned{species}(0)	Bacteria	Firmicutes	Negativicutes	Selenomonadales	Acidaminococcaceae	Phascolarctobacterium	Unassigned
ASV485	28	0	0	6	2	47	0	0	0	0	0	14	0	0	0	0	28	0	0	0	7	0	0	0	0	29	0	0	22	0	24	0	0	0	5	0	6	0	0	30	248	Bacteria{superkingdom}(95);Firmicutes{phylum}(95);Clostridia{class}(95);Clostridiales{order}(95);Lachnospiraceae{family}(95);{genus}(95);Unassigned{species}(0)	Bacteria	Firmicutes	Clostridia	Clostridiales	Lachnospiraceae		Unassigned
ASV486	0	709	0	0	0	0	0	0	0	0	0	0	0	0	0	0	0	0	0	0	667	0	0	0	0	0	0	0	0	0	0	0	0	0	0	0	0	0	0	0	1376	Bacteria{superkingdom}(100);Firmicutes{phylum}(100);Clostridia{class}(100);Clostridiales{order}(100);Ruminococcaceae{family}(100);Faecalibacterium{genus}(100);Unassigned{species}(0)	Bacteria	Firmicutes	Clostridia	Clostridiales	Ruminococcaceae	Faecalibacterium	Unassigned
ASV489	0	0	0	0	10	0	0	0	3	0	0	0	42	0	0	0	19	0	0	0	0	0	0	0	1	0	0	0	0	0	0	0	0	0	353	0	0	0	0	0	428	Bacteria{superkingdom}(100);Proteobacteria{phylum}(100);Gammaproteobacteria{class}(100);Enterobacteriales{order}(100);Enterobacteriaceae{family}(100);Unassigned{genus}(0);Unassigned{species}(0)	Bacteria	Proteobacteria	Gammaproteobacteria	Enterobacteriales	Enterobacteriaceae	Unassigned	Unassigned
ASV492	0	0	0	0	0	0	0	0	0	0	0	0	0	0	0	0	0	0	15	0	0	25	0	0	0	0	0	0	0	0	0	0	233	0	0	0	0	0	0	0	273	Bacteria{superkingdom}(90);Firmicutes{phylum}(90);Clostridia{class}(90);Clostridiales{order}(90);Ruminococcaceae{family}(90);Anaerobacterium{genus}(90);uncultured_rumen_bacterium{species}(90)	Bacteria	Firmicutes	Clostridia	Clostridiales	Ruminococcaceae	Anaerobacterium	uncultured_rumen_bacterium
ASV493	0	8	0	0	0	8	0	0	0	7	0	6	0	149	0	0	0	5	0	0	6	4	0	3	0	0	0	221	7	67	0	0	10	0	13	5	9	14	0	0	542	Bacteria{superkingdom}(100);Firmicutes{phylum}(100);Clostridia{class}(100);Clostridiales{order}(100);Ruminococcaceae{family}(100);Oscillibacter{genus}(100);Unassigned{species}(0)	Bacteria	Firmicutes	Clostridia	Clostridiales	Ruminococcaceae	Oscillibacter	Unassigned
ASV494	0	0	0	0	0	0	0	260	0	0	0	0	0	0	0	0	0	0	0	117	0	0	0	0	0	0	0	133	0	0	0	0	0	0	0	0	0	0	27	161	698	Bacteria{superkingdom}(100);Firmicutes{phylum}(100);Clostridia{class}(100);Clostridiales{order}(100);Lachnospiraceae{family}(100);Blautia{genus}(100);Unassigned{species}(0)	Bacteria	Firmicutes	Clostridia	Clostridiales	Lachnospiraceae	Blautia	Unassigned
ASV495	51	177	0	0	0	20	0	0	0	0	23	0	0	0	0	0	0	36	50	84	89	0	0	0	0	23	0	0	0	0	0	0	0	0	0	0	0	0	0	94	647	Bacteria{superkingdom}(100);Firmicutes{phylum}(100);Clostridia{class}(100);Clostridiales{order}(100);Lachnospiraceae{family}(100);Blautia{genus}(100);Unassigned{species}(0)	Bacteria	Firmicutes	Clostridia	Clostridiales	Lachnospiraceae	Blautia	Unassigned
ASV498	0	0	0	0	0	0	0	0	0	0	0	0	0	0	0	0	0	0	26	0	0	0	0	0	0	0	0	0	0	0	0	0	0	0	0	0	0	0	0	0	26	Bacteria{superkingdom}(99);Firmicutes{phylum}(99);Clostridia{class}(99);Clostridiales{order}(99);Ruminococcaceae{family}(99);{genus}(99);Unassigned{species}(0)	Bacteria	Firmicutes	Clostridia	Clostridiales	Ruminococcaceae		Unassigned
ASV499	0	0	0	0	0	0	0	0	0	0	0	0	0	0	0	0	0	0	0	0	0	28	0	0	0	0	0	0	0	0	0	0	0	0	0	0	0	0	0	0	28	Bacteria{superkingdom}(98);Bacteroidetes{phylum}(98);Bacteroidia{class}(98);Bacteroidales{order}(98);Prevotellaceae{family}(98);Prevotella{genus}(98);Prevotella_stercorea{species}(98)	Bacteria	Bacteroidetes	Bacteroidia	Bacteroidales	Prevotellaceae	Prevotella	Prevotella_stercorea
ASV500	0	0	0	0	0	0	0	0	0	0	0	0	0	0	0	1221	0	0	0	0	0	0	0	0	0	0	0	0	0	0	0	0	0	0	0	0	283	0	0	0	1504	Bacteria{superkingdom}(100);Firmicutes{phylum}(100);Clostridia{class}(100);Clostridiales{order}(100);Lachnospiraceae{family}(100);Ruminococcus2{genus}(100);Unassigned{species}(0)	Bacteria	Firmicutes	Clostridia	Clostridiales	Lachnospiraceae	Ruminococcus2	Unassigned
ASV503	0	0	0	0	0	0	0	155	0	0	0	435	0	0	0	0	0	0	0	0	0	0	0	0	0	0	0	69	0	0	0	452	0	158	0	0	0	0	0	0	1269	Bacteria{superkingdom}(95);Firmicutes{phylum}(95);Clostridia{class}(95);Clostridiales{order}(95);Lachnospiraceae{family}(95);Lachnospiracea_incertae_sedis{genus}(95);Unassigned{species}(0)	Bacteria	Firmicutes	Clostridia	Clostridiales	Lachnospiraceae	Lachnospiracea_incertae_sedis	Unassigned
ASV505	0	0	0	0	0	0	0	0	0	0	0	0	0	0	0	0	0	0	0	0	0	0	0	0	0	0	0	0	0	0	114	0	0	0	0	0	0	0	0	0	114	Bacteria{superkingdom}(99);Firmicutes{phylum}(99);Negativicutes{class}(99);Selenomonadales{order}(99);Veillonellaceae{family}(99);Dialister{genus}(99);Unassigned{species}(0)	Bacteria	Firmicutes	Negativicutes	Selenomonadales	Veillonellaceae	Dialister	Unassigned
ASV508	297	0	0	0	0	0	0	0	6	0	0	0	0	0	0	0	0	0	0	0	0	0	0	0	0	0	0	0	91	0	0	20	0	0	0	0	0	0	0	0	414	Bacteria{superkingdom}(90);Firmicutes{phylum}(90);Clostridia{class}(90);Clostridiales{order}(90);Ruminococcaceae{family}(90);Ruminococcus{genus}(90);uncultured_bacterium{species}(90)	Bacteria	Firmicutes	Clostridia	Clostridiales	Ruminococcaceae	Ruminococcus	uncultured_bacterium
ASV511	0	0	0	0	0	0	0	0	0	0	506	0	0	0	0	0	0	0	0	0	0	0	0	0	0	0	0	0	0	0	712	0	0	0	0	0	0	0	0	0	1218	Bacteria{superkingdom}(93);Firmicutes{phylum}(93);Clostridia{class}(93);Clostridiales{order}(93);Ruminococcaceae{family}(93);Ruminococcus{genus}(93);Ruminococcus_bromii{species}(93)	Bacteria	Firmicutes	Clostridia	Clostridiales	Ruminococcaceae	Ruminococcus	Ruminococcus_bromii
ASV512	0	0	0	0	0	0	0	0	0	0	0	0	0	0	0	0	0	0	0	5	29	0	0	12	0	0	0	81	144	0	30	0	0	0	0	0	18	0	0	0	319	Bacteria{superkingdom}(100);Bacteroidetes{phylum}(100);Bacteroidia{class}(100);Bacteroidales{order}(100);Bacteroidaceae{family}(100);Bacteroides{genus}(100);Unassigned{species}(0)	Bacteria	Bacteroidetes	Bacteroidia	Bacteroidales	Bacteroidaceae	Bacteroides	Unassigned
ASV513	0	0	0	0	0	0	0	0	0	0	0	0	0	0	0	29	0	0	6	0	0	0	0	0	0	0	0	0	0	0	0	0	5	10	0	0	0	7	0	0	57	Bacteria{superkingdom}(99);Firmicutes{phylum}(99);Erysipelotrichia{class}(99);Erysipelotrichales{order}(99);Erysipelotrichaceae{family}(99);Coprobacillus{genus}(99);Coprobacillus_cateniformis{species}(99)	Bacteria	Firmicutes	Erysipelotrichia	Erysipelotrichales	Erysipelotrichaceae	Coprobacillus	Coprobacillus_cateniformis
ASV514	0	0	0	0	0	0	0	0	0	0	0	593	0	0	0	0	0	0	0	0	0	0	0	0	0	0	0	0	0	0	0	893	0	0	0	0	0	0	0	0	1486	Bacteria{superkingdom}(87);Bacteroidetes{phylum}(87);Bacteroidia{class}(87);Bacteroidales{order}(87);Bacteroidaceae{family}(87);Bacteroides{genus}(87);Bacteroides_plebeius{species}(87)	Bacteria	Bacteroidetes	Bacteroidia	Bacteroidales	Bacteroidaceae	Bacteroides	Bacteroides_plebeius
ASV515	0	0	0	26	0	0	0	0	7	0	0	0	0	7	0	0	0	0	20	0	0	37	0	0	0	0	0	0	29	9	10	0	0	0	0	33	0	0	0	9	187	Bacteria{superkingdom}(98);Firmicutes{phylum}(98);Clostridia{class}(98);Clostridiales{order}(98);Lachnospiraceae{family}(98);{genus}(98);Unassigned{species}(0)	Bacteria	Firmicutes	Clostridia	Clostridiales	Lachnospiraceae		Unassigned
ASV516	0	0	0	0	0	105	0	0	0	0	7	0	0	66	0	0	0	0	0	0	0	0	0	0	0	285	0	0	0	0	36	0	340	0	252	0	0	0	0	0	1091	Bacteria{superkingdom}(88);Actinobacteria{phylum}(88);Actinobacteria{class}(88);Coriobacteriales{order}(88);Coriobacteriaceae{family}(88);Adlercreutzia{genus}(88);Unassigned{species}(0)	Bacteria	Actinobacteria	Actinobacteria	Coriobacteriales	Coriobacteriaceae	Adlercreutzia	Unassigned
ASV517	0	0	0	0	0	0	0	0	0	0	0	0	0	0	0	0	0	0	0	0	0	0	96	0	0	0	0	0	0	0	0	0	0	196	0	0	0	0	0	0	292	Bacteria{superkingdom}(99);Firmicutes{phylum}(99);Erysipelotrichia{class}(99);Erysipelotrichales{order}(99);Erysipelotrichaceae{family}(99);Clostridium_XVIII{genus}(99);Unassigned{species}(0)	Bacteria	Firmicutes	Erysipelotrichia	Erysipelotrichales	Erysipelotrichaceae	Clostridium_XVIII	Unassigned
ASV518	0	0	0	0	0	0	0	0	0	0	0	0	0	0	0	0	0	30	0	0	0	0	0	0	0	0	0	0	0	0	0	0	0	39	0	0	0	0	0	0	69	Bacteria{superkingdom}(100);Firmicutes{phylum}(100);Clostridia{class}(100);Clostridiales{order}(100);Lachnospiraceae{family}(100);Coprococcus{genus}(100);Unassigned{species}(0)	Bacteria	Firmicutes	Clostridia	Clostridiales	Lachnospiraceae	Coprococcus	Unassigned
ASV520	0	0	0	0	0	0	80	0	0	0	0	0	0	0	0	0	0	0	0	0	0	0	0	0	0	0	12	0	0	0	87	0	0	0	0	0	0	0	0	0	179	Bacteria{superkingdom}(89);Firmicutes{phylum}(89);Clostridia{class}(89);Clostridiales{order}(89);Ruminococcaceae{family}(89);Clostridium_IV{genus}(89);uncultured_Eubacterium_sp.{species}(89)	Bacteria	Firmicutes	Clostridia	Clostridiales	Ruminococcaceae	Clostridium_IV	uncultured_Eubacterium_sp.
ASV522	0	0	0	0	0	0	0	0	0	0	0	0	0	0	0	0	0	0	45	0	0	0	0	0	0	0	0	0	0	0	0	0	0	0	0	0	0	0	0	0	45	Bacteria{superkingdom}(100);Firmicutes{phylum}(100);{class}(100);{order}(100);{family}(100);{genus}(100);uncultured_Bacteroidetes_bacterium{species}(100)	Bacteria	Firmicutes					uncultured_Bacteroidetes_bacterium
ASV523	0	0	0	0	0	0	9	0	0	0	8	10	0	0	0	0	3	20	6	0	0	0	0	0	0	0	16	0	0	0	5	3	8	0	0	0	0	0	0	0	88	Bacteria{superkingdom}(93);Firmicutes{phylum}(93);Clostridia{class}(93);Clostridiales{order}(93);{family}(93);{genus}(93);Unassigned{species}(0)	Bacteria	Firmicutes	Clostridia	Clostridiales			Unassigned
ASV524	0	0	0	2	0	0	2	0	0	0	0	28	0	0	0	72	47	0	0	0	0	0	0	2	0	0	6	0	19	0	0	30	0	13	0	19	20	11	0	0	271	Bacteria{superkingdom}(100);Firmicutes{phylum}(100);Clostridia{class}(100);Clostridiales{order}(100);Ruminococcaceae{family}(100);Butyricicoccus{genus}(100);Unassigned{species}(0)	Bacteria	Firmicutes	Clostridia	Clostridiales	Ruminococcaceae	Butyricicoccus	Unassigned
ASV526	0	0	0	0	0	0	0	0	0	0	0	0	0	0	0	0	48	0	0	0	0	0	0	0	0	0	0	0	0	0	0	0	0	0	0	0	0	0	0	0	48	Bacteria{superkingdom}(88);Proteobacteria{phylum}(88);Gammaproteobacteria{class}(88);Enterobacteriales{order}(88);Enterobacteriaceae{family}(88);Enterobacter{genus}(88);Unassigned{species}(0)	Bacteria	Proteobacteria	Gammaproteobacteria	Enterobacteriales	Enterobacteriaceae	Enterobacter	Unassigned
ASV527	0	0	0	0	0	0	0	0	0	0	53	0	0	54	0	0	7	0	26	0	0	21	0	0	0	0	0	0	0	0	0	0	0	0	0	0	0	50	0	0	211	Bacteria{superkingdom}(100);Firmicutes{phylum}(100);Clostridia{class}(100);Clostridiales{order}(100);Lachnospiraceae{family}(100);Lachnospiracea_incertae_sedis{genus}(100);Unassigned{species}(0)	Bacteria	Firmicutes	Clostridia	Clostridiales	Lachnospiraceae	Lachnospiracea_incertae_sedis	Unassigned
ASV529	0	0	0	0	0	0	0	0	0	0	3	0	0	0	0	0	0	0	0	0	0	0	0	0	0	0	0	0	0	0	781	0	0	0	0	0	0	0	0	0	784	Bacteria{superkingdom}(90);Firmicutes{phylum}(90);Clostridia{class}(90);Clostridiales{order}(90);Ruminococcaceae{family}(90);Anaerobacterium{genus}(90);Unassigned{species}(0)	Bacteria	Firmicutes	Clostridia	Clostridiales	Ruminococcaceae	Anaerobacterium	Unassigned
ASV532	0	0	0	0	0	76	0	0	0	0	0	0	0	0	0	0	0	0	0	0	0	0	0	0	0	220	0	0	0	0	0	0	0	0	0	0	0	0	0	0	296	Bacteria{superkingdom}(100);Firmicutes{phylum}(100);Clostridia{class}(100);Clostridiales{order}(100);Ruminococcaceae{family}(100);Faecalibacterium{genus}(100);Unassigned{species}(0)	Bacteria	Firmicutes	Clostridia	Clostridiales	Ruminococcaceae	Faecalibacterium	Unassigned
ASV534	0	0	0	0	0	0	0	0	0	0	0	0	0	0	0	0	0	0	0	0	0	56	0	0	0	0	27	0	0	0	0	0	0	0	0	0	0	0	0	0	83	Bacteria{superkingdom}(100);Firmicutes{phylum}(100);Negativicutes{class}(100);Selenomonadales{order}(100);Acidaminococcaceae{family}(100);Phascolarctobacterium{genus}(100);Unassigned{species}(0)	Bacteria	Firmicutes	Negativicutes	Selenomonadales	Acidaminococcaceae	Phascolarctobacterium	Unassigned
ASV536	0	0	0	0	0	0	0	0	0	0	0	0	0	0	0	0	0	0	0	0	0	0	0	0	0	0	0	0	0	0	0	0	0	0	0	35	0	0	0	0	35	Bacteria{superkingdom}(83);Firmicutes{phylum}(83);Clostridia{class}(83);Clostridiales{order}(83);Ruminococcaceae{family}(83);{genus}(83);Unassigned{species}(0)	Bacteria	Firmicutes	Clostridia	Clostridiales	Ruminococcaceae		Unassigned
ASV539	0	0	0	0	0	0	0	0	0	0	0	0	0	0	0	0	0	0	0	37	0	0	0	0	0	0	0	0	0	0	0	0	0	0	0	0	0	0	0	47	84	Bacteria{superkingdom}(100);Bacteroidetes{phylum}(100);Bacteroidia{class}(100);Bacteroidales{order}(100);Bacteroidaceae{family}(100);Bacteroides{genus}(100);Unassigned{species}(0)	Bacteria	Bacteroidetes	Bacteroidia	Bacteroidales	Bacteroidaceae	Bacteroides	Unassigned
ASV540	0	0	0	0	0	0	0	0	0	0	0	0	0	0	54	0	0	0	0	0	0	0	0	0	0	0	0	0	0	0	0	0	0	0	0	0	0	0	0	0	54	Bacteria{superkingdom}(99);Firmicutes{phylum}(99);Negativicutes{class}(99);Selenomonadales{order}(99);Veillonellaceae{family}(99);Dialister{genus}(99);Unassigned{species}(0)	Bacteria	Firmicutes	Negativicutes	Selenomonadales	Veillonellaceae	Dialister	Unassigned
ASV541	0	0	0	0	0	0	0	0	22	0	0	0	5	0	0	1117	92	1	17	0	0	0	0	0	0	0	0	0	0	0	0	0	0	0	9	0	1	0	0	0	1264	Bacteria{superkingdom}(100);Firmicutes{phylum}(100);Bacilli{class}(100);Lactobacillales{order}(100);Streptococcaceae{family}(100);Lactococcus{genus}(100);Unassigned{species}(0)	Bacteria	Firmicutes	Bacilli	Lactobacillales	Streptococcaceae	Lactococcus	Unassigned
ASV542	0	0	0	63	0	0	0	0	0	46	0	0	0	79	49	0	0	0	0	0	0	19	0	40	0	0	0	0	0	0	0	0	0	16	95	0	0	0	0	0	407	Bacteria{superkingdom}(100);Firmicutes{phylum}(100);Clostridia{class}(100);Clostridiales{order}(100);Ruminococcaceae{family}(100);Butyricicoccus{genus}(100);Unassigned{species}(0)	Bacteria	Firmicutes	Clostridia	Clostridiales	Ruminococcaceae	Butyricicoccus	Unassigned
ASV543	0	0	0	0	0	0	0	0	0	0	0	0	0	0	0	0	0	0	0	0	0	0	414	0	0	0	0	0	0	0	0	0	0	0	0	0	0	0	0	0	414	Bacteria{superkingdom}(100);Proteobacteria{phylum}(100);Gammaproteobacteria{class}(100);Pasteurellales{order}(100);Pasteurellaceae{family}(100);Haemophilus{genus}(100);Unassigned{species}(0)	Bacteria	Proteobacteria	Gammaproteobacteria	Pasteurellales	Pasteurellaceae	Haemophilus	Unassigned
ASV545	51	0	120	0	0	0	0	0	0	0	0	0	0	0	0	0	0	0	0	0	0	0	189	0	0	0	0	0	0	0	0	0	0	0	0	0	0	0	0	0	360	Bacteria{superkingdom}(100);Firmicutes{phylum}(100);Clostridia{class}(100);Clostridiales{order}(100);Ruminococcaceae{family}(100);Faecalibacterium{genus}(100);Unassigned{species}(0)	Bacteria	Firmicutes	Clostridia	Clostridiales	Ruminococcaceae	Faecalibacterium	Unassigned
ASV546	0	0	0	0	0	0	0	0	0	0	17	0	0	464	0	0	0	0	0	0	0	0	0	0	0	0	0	0	4	0	0	0	0	0	16	0	0	0	0	0	501	Bacteria{superkingdom}(100);Firmicutes{phylum}(100);Bacilli{class}(100);Lactobacillales{order}(100);Streptococcaceae{family}(100);Lactococcus{genus}(100);Unassigned{species}(0)	Bacteria	Firmicutes	Bacilli	Lactobacillales	Streptococcaceae	Lactococcus	Unassigned
ASV547	0	8	2	0	0	0	0	7	0	11	0	0	0	0	0	9	0	0	10	0	0	0	31	0	0	0	0	0	0	2	0	0	0	8	0	0	13	0	0	0	101	Bacteria{superkingdom}(100);Firmicutes{phylum}(100);Negativicutes{class}(100);Selenomonadales{order}(100);Veillonellaceae{family}(100);Veillonella{genus}(100);Unassigned{species}(0)	Bacteria	Firmicutes	Negativicutes	Selenomonadales	Veillonellaceae	Veillonella	Unassigned
ASV548	0	0	0	0	0	0	0	0	0	0	0	9	0	28	0	0	0	18	0	0	0	0	0	0	0	0	93	0	0	0	0	0	0	0	4	0	0	52	0	0	204	Bacteria{superkingdom}(80);Firmicutes{phylum}(80);Clostridia{class}(80);Clostridiales{order}(80);Ruminococcaceae{family}(80);Sporobacter{genus}(80);uncultured_bacterium{species}(80)	Bacteria	Firmicutes	Clostridia	Clostridiales	Ruminococcaceae	Sporobacter	uncultured_bacterium
ASV549	0	0	0	0	0	0	85	0	0	0	0	0	0	0	135	0	0	0	0	0	0	0	0	0	0	0	40	0	0	0	0	0	0	0	0	0	0	0	0	0	260	Bacteria{superkingdom}(100);Firmicutes{phylum}(100);Clostridia{class}(100);Clostridiales{order}(100);Ruminococcaceae{family}(100);Butyricicoccus{genus}(100);Unassigned{species}(0)	Bacteria	Firmicutes	Clostridia	Clostridiales	Ruminococcaceae	Butyricicoccus	Unassigned
ASV550	0	0	0	0	0	0	0	0	6	0	0	5	0	78	0	0	0	0	44	0	0	0	0	0	0	0	0	0	41	11	13	21	42	3	7	0	0	0	0	0	271	Bacteria{superkingdom}(81);Firmicutes{phylum}(81);Clostridia{class}(81);Clostridiales{order}(81);Lachnospiraceae{family}(81);Lachnospiracea_incertae_sedis{genus}(81);uncultured_bacterium_adhufec37.25{species}(81)	Bacteria	Firmicutes	Clostridia	Clostridiales	Lachnospiraceae	Lachnospiracea_incertae_sedis	uncultured_bacterium_adhufec37.25
ASV552	0	0	0	0	0	482	0	0	0	0	0	0	0	0	0	0	0	0	0	0	0	0	0	0	0	592	0	0	0	0	0	0	0	0	0	0	0	0	0	0	1074	Bacteria{superkingdom}(100);Bacteroidetes{phylum}(100);Bacteroidia{class}(100);Bacteroidales{order}(100);Rikenellaceae{family}(100);Alistipes{genus}(100);Unassigned{species}(0)	Bacteria	Bacteroidetes	Bacteroidia	Bacteroidales	Rikenellaceae	Alistipes	Unassigned
ASV553	0	0	0	0	0	0	138	0	0	0	0	0	0	0	0	0	0	0	0	0	0	0	0	0	0	0	742	0	0	0	0	0	0	0	0	0	0	0	0	0	880	Bacteria{superkingdom}(82);Bacteroidetes{phylum}(82);Bacteroidia{class}(82);Bacteroidales{order}(82);Porphyromonadaceae{family}(82);Barnesiella{genus}(82);uncultured_organism{species}(82)	Bacteria	Bacteroidetes	Bacteroidia	Bacteroidales	Porphyromonadaceae	Barnesiella	uncultured_organism
ASV554	0	0	0	0	0	0	0	0	0	0	0	57	0	0	0	0	0	0	0	0	0	0	0	0	15	0	0	0	0	0	213	0	0	0	0	0	0	0	0	0	285	Bacteria{superkingdom}(100);Bacteroidetes{phylum}(100);Bacteroidia{class}(100);Bacteroidales{order}(100);Bacteroidaceae{family}(100);Bacteroides{genus}(100);Unassigned{species}(0)	Bacteria	Bacteroidetes	Bacteroidia	Bacteroidales	Bacteroidaceae	Bacteroides	Unassigned
ASV555	17	0	0	0	0	0	0	0	0	0	0	0	0	0	0	0	0	0	0	40	0	8	0	0	0	0	0	0	0	0	24	0	0	5	0	0	0	0	0	0	94	Bacteria{superkingdom}(90);Firmicutes{phylum}(90);Clostridia{class}(90);Clostridiales{order}(90);Lachnospiraceae{family}(90);Clostridium_XlVa{genus}(90);Unassigned{species}(0)	Bacteria	Firmicutes	Clostridia	Clostridiales	Lachnospiraceae	Clostridium_XlVa	Unassigned
ASV556	0	0	0	0	0	0	0	0	0	0	0	0	0	0	0	0	0	0	0	0	0	0	0	0	0	0	0	0	0	0	0	0	0	0	0	0	0	0	2	19	21	Bacteria{superkingdom}(100);Firmicutes{phylum}(100);Negativicutes{class}(100);Selenomonadales{order}(100);Veillonellaceae{family}(100);Veillonella{genus}(100);Unassigned{species}(0)	Bacteria	Firmicutes	Negativicutes	Selenomonadales	Veillonellaceae	Veillonella	Unassigned
ASV557	0	0	0	0	0	0	0	0	0	0	0	0	0	0	0	0	0	0	0	0	0	8	0	0	0	0	0	0	0	0	0	0	0	0	0	0	0	0	0	0	8	Bacteria{superkingdom}(100);Proteobacteria{phylum}(100);Gammaproteobacteria{class}(100);Pasteurellales{order}(100);Pasteurellaceae{family}(100);Haemophilus{genus}(100);Unassigned{species}(0)	Bacteria	Proteobacteria	Gammaproteobacteria	Pasteurellales	Pasteurellaceae	Haemophilus	Unassigned
ASV558	0	0	0	0	0	0	0	0	0	0	0	0	0	0	106	0	0	221	0	0	0	0	0	0	0	0	0	0	0	0	0	0	0	51	0	0	60	0	0	0	438	Bacteria{superkingdom}(80);Firmicutes{phylum}(80);Clostridia{class}(80);Clostridiales{order}(80);Lachnospiraceae{family}(80);Lachnospiracea_incertae_sedis{genus}(80);uncultured_Eubacteriaceae_bacterium{species}(80)	Bacteria	Firmicutes	Clostridia	Clostridiales	Lachnospiraceae	Lachnospiracea_incertae_sedis	uncultured_Eubacteriaceae_bacterium
ASV560	0	0	0	0	0	0	0	0	0	0	0	0	0	0	0	0	11	0	7	0	0	0	0	0	0	0	0	0	0	0	0	0	6	0	0	0	0	0	0	0	24	Bacteria{superkingdom}(100);Firmicutes{phylum}(100);Clostridia{class}(100);Clostridiales{order}(100);Ruminococcaceae{family}(100);Intestinimonas{genus}(100);uncultured_bacterium{species}(100)	Bacteria	Firmicutes	Clostridia	Clostridiales	Ruminococcaceae	Intestinimonas	uncultured_bacterium
ASV561	200	11	0	0	0	0	2	0	0	2	0	0	0	0	0	0	0	1	0	0	13	0	0	0	30	0	0	0	1	9	114	1	0	1	1	0	0	1	0	0	387	Bacteria{superkingdom}(87);Bacteroidetes{phylum}(87);Bacteroidia{class}(87);Bacteroidales{order}(87);Bacteroidaceae{family}(87);Bacteroides{genus}(87);Bacteroides_ovatus{species}(87)	Bacteria	Bacteroidetes	Bacteroidia	Bacteroidales	Bacteroidaceae	Bacteroides	Bacteroides_ovatus
ASV562	0	0	8	0	27	0	0	0	0	0	29	0	64	0	0	12	48	0	0	0	0	0	0	0	0	0	0	0	0	0	0	0	0	0	0	0	0	0	27	22	237	Bacteria{superkingdom}(83);Proteobacteria{phylum}(83);Gammaproteobacteria{class}(83);Enterobacteriales{order}(83);Enterobacteriaceae{family}(83);Citrobacter{genus}(83);Unassigned{species}(0)	Bacteria	Proteobacteria	Gammaproteobacteria	Enterobacteriales	Enterobacteriaceae	Citrobacter	Unassigned
ASV563	0	0	0	0	0	0	0	0	0	0	0	0	0	0	0	0	0	0	0	0	0	0	376	0	0	0	0	0	0	0	0	0	0	60	0	0	0	0	0	0	436	Bacteria{superkingdom}(100);Firmicutes{phylum}(100);Clostridia{class}(100);Clostridiales{order}(100);Lachnospiraceae{family}(100);Roseburia{genus}(100);Unassigned{species}(0)	Bacteria	Firmicutes	Clostridia	Clostridiales	Lachnospiraceae	Roseburia	Unassigned
ASV565	0	0	0	187	0	0	0	0	0	0	0	0	31	0	0	0	0	0	0	0	0	0	0	137	0	0	0	0	0	0	0	0	0	0	0	0	0	0	0	0	355	Bacteria{superkingdom}(97);Firmicutes{phylum}(97);Clostridia{class}(97);Clostridiales{order}(97);Lachnospiraceae{family}(97);Lachnospiracea_incertae_sedis{genus}(97);Unassigned{species}(0)	Bacteria	Firmicutes	Clostridia	Clostridiales	Lachnospiraceae	Lachnospiracea_incertae_sedis	Unassigned
ASV566	0	0	18	7	8	5	12	27	0	0	6	0	0	1	0	3	5	7	3	2	0	6	23	0	1	0	0	0	0	3	1	0	0	0	6	0	0	9	0	3	156	Bacteria{superkingdom}(100);Proteobacteria{phylum}(100);Gammaproteobacteria{class}(100);Enterobacteriales{order}(100);Enterobacteriaceae{family}(100);Unassigned{genus}(0);Unassigned{species}(0)	Bacteria	Proteobacteria	Gammaproteobacteria	Enterobacteriales	Enterobacteriaceae	Unassigned	Unassigned
ASV567	20	0	0	0	0	0	0	0	0	0	0	22	0	0	0	0	0	0	23	0	0	0	0	0	0	0	17	0	0	0	0	0	0	16	0	0	0	0	0	0	98	Bacteria{superkingdom}(98);Firmicutes{phylum}(98);Clostridia{class}(98);Clostridiales{order}(98);Ruminococcaceae{family}(98);Sporobacter{genus}(98);uncultured_bacterium{species}(98)	Bacteria	Firmicutes	Clostridia	Clostridiales	Ruminococcaceae	Sporobacter	uncultured_bacterium
ASV568	0	0	0	121	0	0	0	0	0	0	0	0	0	0	0	0	0	0	0	0	0	0	0	0	0	0	0	0	0	0	0	0	0	0	0	0	0	0	0	0	121	Bacteria{superkingdom}(100);Bacteroidetes{phylum}(100);Bacteroidia{class}(100);Bacteroidales{order}(100);Prevotellaceae{family}(100);Prevotella{genus}(100);Unassigned{species}(0)	Bacteria	Bacteroidetes	Bacteroidia	Bacteroidales	Prevotellaceae	Prevotella	Unassigned
ASV570	0	0	0	0	0	0	0	0	0	0	0	0	0	0	106	0	0	183	0	0	0	0	0	0	0	0	0	0	0	0	0	0	0	39	0	0	0	0	0	0	328	Bacteria{superkingdom}(91);Firmicutes{phylum}(91);Clostridia{class}(91);Clostridiales{order}(91);Lachnospiraceae{family}(91);Lachnospiracea_incertae_sedis{genus}(91);uncultured_Eubacteriaceae_bacterium{species}(91)	Bacteria	Firmicutes	Clostridia	Clostridiales	Lachnospiraceae	Lachnospiracea_incertae_sedis	uncultured_Eubacteriaceae_bacterium
ASV571	0	0	0	0	0	0	0	0	0	0	0	0	0	384	0	0	0	0	0	0	0	0	0	0	0	0	0	0	0	0	0	0	0	0	704	0	0	0	0	0	1088	Bacteria{superkingdom}(96);Firmicutes{phylum}(96);Clostridia{class}(96);Clostridiales{order}(96);Lachnospiraceae{family}(96);Lachnospiracea_incertae_sedis{genus}(96);Unassigned{species}(0)	Bacteria	Firmicutes	Clostridia	Clostridiales	Lachnospiraceae	Lachnospiracea_incertae_sedis	Unassigned
ASV573	0	103	0	0	0	0	0	0	0	0	0	0	0	0	0	0	0	0	0	0	0	0	0	0	0	0	0	0	0	0	0	0	0	0	0	0	69	0	0	0	172	Bacteria{superkingdom}(97);Bacteroidetes{phylum}(97);Bacteroidia{class}(97);Bacteroidales{order}(97);Bacteroidaceae{family}(97);Bacteroides{genus}(97);Bacteroides_massiliensis{species}(97)	Bacteria	Bacteroidetes	Bacteroidia	Bacteroidales	Bacteroidaceae	Bacteroides	Bacteroides_massiliensis
ASV574	0	0	0	0	0	0	0	0	0	0	0	0	0	0	0	0	0	0	73	0	0	0	0	0	0	0	0	0	0	0	0	0	0	0	0	22	0	34	0	0	129	Bacteria{superkingdom}(100);Firmicutes{phylum}(100);Clostridia{class}(100);Clostridiales{order}(100);Lachnospiraceae{family}(100);Unassigned{genus}(0);Unassigned{species}(0)	Bacteria	Firmicutes	Clostridia	Clostridiales	Lachnospiraceae	Unassigned	Unassigned
ASV575	0	0	6	0	0	0	1	0	0	0	0	0	0	0	0	0	0	0	0	0	0	0	0	0	0	0	0	0	0	0	0	0	0	0	0	0	0	0	0	0	7	Bacteria{superkingdom}(100);Bacteroidetes{phylum}(100);Bacteroidia{class}(100);Bacteroidales{order}(100);Prevotellaceae{family}(100);Prevotella{genus}(100);Unassigned{species}(0)	Bacteria	Bacteroidetes	Bacteroidia	Bacteroidales	Prevotellaceae	Prevotella	Unassigned
ASV576	0	0	0	24	7	0	0	0	0	0	0	0	0	0	0	0	11	0	0	48	0	114	3	0	0	0	0	0	0	0	0	0	0	0	3	0	0	0	0	49	259	Bacteria{superkingdom}(100);Proteobacteria{phylum}(100);Betaproteobacteria{class}(100);Burkholderiales{order}(100);Sutterellaceae{family}(100);Parasutterella{genus}(100);Unassigned{species}(0)	Bacteria	Proteobacteria	Betaproteobacteria	Burkholderiales	Sutterellaceae	Parasutterella	Unassigned
ASV577	8	0	0	0	0	0	24	0	8	0	8	8	0	0	0	0	14	9	51	0	0	13	0	0	0	0	31	0	6	0	10	5	24	8	0	0	6	0	0	15	248	Bacteria{superkingdom}(93);Firmicutes{phylum}(93);Clostridia{class}(93);Clostridiales{order}(93);Lachnospiraceae{family}(93);{genus}(93);Unassigned{species}(0)	Bacteria	Firmicutes	Clostridia	Clostridiales	Lachnospiraceae		Unassigned
ASV578	0	0	0	0	0	160	0	0	0	0	0	0	0	0	0	0	0	0	0	0	0	0	0	0	0	71	0	0	0	0	0	0	0	0	0	0	0	0	0	0	231	Bacteria{superkingdom}(100);Bacteroidetes{phylum}(100);Bacteroidia{class}(100);Bacteroidales{order}(100);Prevotellaceae{family}(100);Prevotella{genus}(100);Unassigned{species}(0)	Bacteria	Bacteroidetes	Bacteroidia	Bacteroidales	Prevotellaceae	Prevotella	Unassigned
ASV579	0	8	6	4	9	0	38	9	20	21	15	0	11	4	28	3	8	8	0	0	19	0	8	19	7	0	0	0	5	0	0	0	14	0	23	0	0	0	0	0	287	Bacteria{superkingdom}(100);Firmicutes{phylum}(100);Bacilli{class}(100);Bacillales{order}(100);Bacillales_Incertae_Sedis_XI{family}(100);Gemella{genus}(100);Unassigned{species}(0)	Bacteria	Firmicutes	Bacilli	Bacillales	Bacillales_Incertae_Sedis_XI	Gemella	Unassigned
ASV580	0	0	0	0	0	0	0	0	0	0	0	0	0	0	0	0	0	0	0	0	0	0	0	0	0	0	126	0	0	0	0	0	0	0	0	0	134	223	0	0	483	Bacteria{superkingdom}(99);Bacteroidetes{phylum}(99);Bacteroidia{class}(99);Bacteroidales{order}(99);Bacteroidaceae{family}(99);Bacteroides{genus}(99);Bacteroides_eggerthii{species}(99)	Bacteria	Bacteroidetes	Bacteroidia	Bacteroidales	Bacteroidaceae	Bacteroides	Bacteroides_eggerthii
ASV582	0	0	0	0	0	0	0	0	0	0	0	0	0	0	0	0	0	0	0	0	0	51	0	0	0	0	0	0	0	0	0	0	0	0	0	0	0	0	0	0	51	Bacteria{superkingdom}(96);Firmicutes{phylum}(96);Clostridia{class}(96);Clostridiales{order}(96);Ruminococcaceae{family}(96);Anaerobacterium{genus}(96);uncultured_bacterium{species}(96)	Bacteria	Firmicutes	Clostridia	Clostridiales	Ruminococcaceae	Anaerobacterium	uncultured_bacterium
ASV583	0	0	0	0	0	0	0	0	0	0	0	0	0	0	0	0	0	0	0	0	0	0	0	0	0	0	0	0	0	0	0	0	323	0	0	0	0	0	0	0	323	Bacteria{superkingdom}(100);Firmicutes{phylum}(100);{class}(100);{order}(100);{family}(100);{genus}(100);uncultured_Turicibacter_sp.{species}(100)	Bacteria	Firmicutes					uncultured_Turicibacter_sp.
ASV584	27	0	6	0	12	0	0	0	0	26	0	0	0	0	0	28	0	0	0	0	17	0	57	0	0	0	0	0	0	22	0	0	0	0	16	0	0	0	0	0	211	Bacteria{superkingdom}(100);Firmicutes{phylum}(100);Negativicutes{class}(100);Selenomonadales{order}(100);Veillonellaceae{family}(100);Veillonella{genus}(100);Unassigned{species}(0)	Bacteria	Firmicutes	Negativicutes	Selenomonadales	Veillonellaceae	Veillonella	Unassigned
ASV585	175	0	0	0	0	2	0	0	0	0	0	0	0	0	0	0	0	0	0	0	0	0	0	0	0	0	0	0	0	0	0	0	0	9	65	0	0	0	0	0	251	Bacteria{superkingdom}(100);Proteobacteria{phylum}(100);Gammaproteobacteria{class}(100);Pasteurellales{order}(100);Pasteurellaceae{family}(100);Haemophilus{genus}(100);Unassigned{species}(0)	Bacteria	Proteobacteria	Gammaproteobacteria	Pasteurellales	Pasteurellaceae	Haemophilus	Unassigned
ASV586	0	0	0	0	0	0	11	0	0	0	0	0	0	0	0	0	0	0	0	0	0	0	0	0	0	0	940	0	0	0	0	0	0	0	0	0	0	0	0	0	951	Bacteria{superkingdom}(100);Firmicutes{phylum}(100);{class}(100);{order}(100);{family}(100);{genus}(100);Unassigned{species}(0)	Bacteria	Firmicutes					Unassigned
ASV588	0	0	0	0	0	0	0	0	0	0	0	0	0	0	0	0	0	27	0	0	0	0	0	0	0	0	0	0	0	0	0	0	0	0	0	0	0	0	0	0	27	Bacteria{superkingdom}(100);Firmicutes{phylum}(100);Clostridia{class}(100);Clostridiales{order}(100);Ruminococcaceae{family}(100);Unassigned{genus}(0);Unassigned{species}(0)	Bacteria	Firmicutes	Clostridia	Clostridiales	Ruminococcaceae	Unassigned	Unassigned
ASV589	0	0	0	0	0	0	0	0	0	0	0	0	0	0	0	0	11	0	0	0	0	0	0	0	0	0	0	0	0	0	0	0	0	0	0	0	0	0	0	0	11	Bacteria{superkingdom}(85);Bacteroidetes{phylum}(85);Bacteroidia{class}(85);Bacteroidales{order}(85);Porphyromonadaceae{family}(85);Barnesiella{genus}(85);Unassigned{species}(0)	Bacteria	Bacteroidetes	Bacteroidia	Bacteroidales	Porphyromonadaceae	Barnesiella	Unassigned
ASV592	0	0	1	0	0	0	0	0	0	8	0	0	0	0	0	0	0	0	0	0	0	0	9	0	0	0	0	0	0	1	0	0	0	0	8	0	0	0	0	0	27	Bacteria{superkingdom}(100);Firmicutes{phylum}(100);Negativicutes{class}(100);Selenomonadales{order}(100);Veillonellaceae{family}(100);Veillonella{genus}(100);Unassigned{species}(0)	Bacteria	Firmicutes	Negativicutes	Selenomonadales	Veillonellaceae	Veillonella	Unassigned
ASV594	0	0	0	0	0	0	0	0	0	0	0	0	0	0	0	0	0	0	36	0	0	0	0	0	0	0	0	0	0	0	0	0	0	0	0	0	0	0	0	0	36	Bacteria{superkingdom}(100);Firmicutes{phylum}(100);Clostridia{class}(100);Clostridiales{order}(100);Lachnospiraceae{family}(100);Lachnospiracea_incertae_sedis{genus}(100);Unassigned{species}(0)	Bacteria	Firmicutes	Clostridia	Clostridiales	Lachnospiraceae	Lachnospiracea_incertae_sedis	Unassigned
ASV598	0	0	0	12	0	0	10	0	0	72	0	0	0	0	0	0	23	0	79	0	0	12	0	21	0	7	67	0	0	80	0	10	0	10	0	0	61	8	0	0	472	Bacteria{superkingdom}(98);Firmicutes{phylum}(98);Clostridia{class}(98);Clostridiales{order}(98);{family}(98);{genus}(98);uncultured_Christensenellaceae_bacterium{species}(98)	Bacteria	Firmicutes	Clostridia	Clostridiales			uncultured_Christensenellaceae_bacterium
ASV601	0	0	0	0	0	36	0	0	0	0	0	36	0	0	0	0	0	0	0	0	0	1	0	0	0	64	1	0	0	0	0	0	0	0	0	0	0	0	0	0	138	Bacteria{superkingdom}(89);Bacteroidetes{phylum}(89);Bacteroidia{class}(89);Bacteroidales{order}(89);Porphyromonadaceae{family}(89);Parabacteroides{genus}(89);Parabacteroides_distasonis{species}(89)	Bacteria	Bacteroidetes	Bacteroidia	Bacteroidales	Porphyromonadaceae	Parabacteroides	Parabacteroides_distasonis
ASV602	0	0	0	0	0	0	8	0	0	0	0	0	0	0	0	0	0	0	0	0	0	0	0	0	0	0	48	0	0	0	0	0	0	0	0	0	0	0	0	0	56	Bacteria{superkingdom}(99);Bacteroidetes{phylum}(99);Bacteroidia{class}(99);Bacteroidales{order}(99);Prevotellaceae{family}(99);Paraprevotella{genus}(99);uncultured_organism{species}(99)	Bacteria	Bacteroidetes	Bacteroidia	Bacteroidales	Prevotellaceae	Paraprevotella	uncultured_organism
ASV603	0	0	0	0	0	0	0	0	0	0	0	0	0	0	0	0	0	0	104	0	0	0	0	0	0	0	0	0	0	0	0	0	0	0	0	0	0	0	0	0	104	Bacteria{superkingdom}(80);Firmicutes{phylum}(80);Clostridia{class}(80);Clostridiales{order}(80);Ruminococcaceae{family}(80);Oscillibacter{genus}(80);uncultured_Bacteroidetes_bacterium{species}(80)	Bacteria	Firmicutes	Clostridia	Clostridiales	Ruminococcaceae	Oscillibacter	uncultured_Bacteroidetes_bacterium
ASV605	0	0	0	2	0	0	0	0	0	0	0	0	0	3	0	0	0	0	0	0	0	0	0	16	0	0	0	0	0	0	10	0	0	0	0	0	0	0	0	0	31	Bacteria{superkingdom}(100);Bacteroidetes{phylum}(100);Bacteroidia{class}(100);Bacteroidales{order}(100);Porphyromonadaceae{family}(100);Butyricimonas{genus}(100);Unassigned{species}(0)	Bacteria	Bacteroidetes	Bacteroidia	Bacteroidales	Porphyromonadaceae	Butyricimonas	Unassigned
ASV606	0	0	0	0	0	0	0	0	0	0	0	45	0	0	0	0	0	0	0	0	0	0	0	0	0	0	0	0	0	0	0	10	0	0	0	0	0	0	0	0	55	Bacteria{superkingdom}(100);Firmicutes{phylum}(100);{class}(100);{order}(100);{family}(100);{genus}(100);uncultured_Bacteroidetes_bacterium{species}(100)	Bacteria	Firmicutes					uncultured_Bacteroidetes_bacterium
ASV609	0	0	0	0	0	0	0	0	0	0	0	0	0	0	0	0	0	0	58	16	0	19	0	0	0	0	0	0	0	0	0	0	0	0	0	0	0	31	0	0	124	Bacteria{superkingdom}(100);Firmicutes{phylum}(100);Clostridia{class}(100);Clostridiales{order}(100);Ruminococcaceae{family}(100);Oscillibacter{genus}(100);Unassigned{species}(0)	Bacteria	Firmicutes	Clostridia	Clostridiales	Ruminococcaceae	Oscillibacter	Unassigned
ASV611	0	0	0	0	0	0	0	0	0	0	0	0	0	0	0	0	128	0	0	0	0	52	0	0	0	0	0	0	0	0	0	0	0	0	0	0	0	294	0	0	474	Bacteria{superkingdom}(92);Firmicutes{phylum}(92);Clostridia{class}(92);Clostridiales{order}(92);Ruminococcaceae{family}(92);Anaerobacterium{genus}(92);uncultured_bacterium{species}(92)	Bacteria	Firmicutes	Clostridia	Clostridiales	Ruminococcaceae	Anaerobacterium	uncultured_bacterium
ASV612	0	0	0	0	0	0	0	0	0	0	0	0	0	0	0	0	0	0	0	0	0	0	0	0	0	0	0	0	0	0	0	0	33	0	0	0	0	0	0	0	33	Bacteria{superkingdom}(100);Firmicutes{phylum}(100);Clostridia{class}(100);Clostridiales{order}(100);Ruminococcaceae{family}(100);Anaerobacterium{genus}(100);Unassigned{species}(0)	Bacteria	Firmicutes	Clostridia	Clostridiales	Ruminococcaceae	Anaerobacterium	Unassigned
ASV613	0	0	0	0	103	0	0	0	0	0	0	0	0	0	85	0	0	0	0	0	0	0	0	0	0	0	0	0	0	0	0	0	0	0	0	0	0	0	0	0	188	Bacteria{superkingdom}(100);Proteobacteria{phylum}(100);Gammaproteobacteria{class}(100);Enterobacteriales{order}(100);Enterobacteriaceae{family}(100);Escherichia/Shigella{genus}(100);Unassigned{species}(0)	Bacteria	Proteobacteria	Gammaproteobacteria	Enterobacteriales	Enterobacteriaceae	Escherichia/Shigella	Unassigned
ASV615	0	2	3	28	13	0	38	0	4	33	22	0	11	0	13	1	23	15	0	0	2	5	0	3	4	0	0	4	12	11	19	0	14	0	5	17	0	0	6	0	308	Bacteria{superkingdom}(100);Firmicutes{phylum}(100);Bacilli{class}(100);Lactobacillales{order}(100);Streptococcaceae{family}(100);Streptococcus{genus}(100);Unassigned{species}(0)	Bacteria	Firmicutes	Bacilli	Lactobacillales	Streptococcaceae	Streptococcus	Unassigned
ASV616	4	2	0	0	0	9	0	0	28	0	0	5	0	14	0	0	0	0	0	0	9	41	17	24	33	47	10	0	0	0	0	5	0	27	35	0	0	0	0	0	310	Bacteria{superkingdom}(100);Firmicutes{phylum}(100);Bacilli{class}(100);Lactobacillales{order}(100);Streptococcaceae{family}(100);Streptococcus{genus}(100);Unassigned{species}(0)	Bacteria	Firmicutes	Bacilli	Lactobacillales	Streptococcaceae	Streptococcus	Unassigned
ASV617	0	0	0	0	0	0	2	0	0	0	0	0	0	0	0	0	0	0	0	0	0	28	0	0	0	0	0	0	0	0	0	0	0	0	0	0	0	0	0	0	30	Bacteria{superkingdom}(100);Firmicutes{phylum}(100);Negativicutes{class}(100);Selenomonadales{order}(100);Acidaminococcaceae{family}(100);Phascolarctobacterium{genus}(100);Unassigned{species}(0)	Bacteria	Firmicutes	Negativicutes	Selenomonadales	Acidaminococcaceae	Phascolarctobacterium	Unassigned
ASV620	0	0	0	0	0	0	0	0	0	0	0	0	0	0	0	0	0	0	0	0	0	0	0	0	0	0	0	0	0	0	0	0	0	23	0	0	0	0	0	0	23	Bacteria{superkingdom}(99);Bacteroidetes{phylum}(99);Bacteroidia{class}(99);Bacteroidales{order}(99);Bacteroidaceae{family}(99);Bacteroides{genus}(99);Bacteroides_intestinalis{species}(99)	Bacteria	Bacteroidetes	Bacteroidia	Bacteroidales	Bacteroidaceae	Bacteroides	Bacteroides_intestinalis
ASV621	0	0	0	0	0	0	0	0	0	0	0	0	0	0	0	0	0	0	48	0	0	0	0	0	0	0	0	0	0	0	0	0	0	0	0	0	0	18	0	0	66	Bacteria{superkingdom}(100);Firmicutes{phylum}(100);Clostridia{class}(100);Clostridiales{order}(100);Ruminococcaceae{family}(100);Oscillibacter{genus}(100);Unassigned{species}(0)	Bacteria	Firmicutes	Clostridia	Clostridiales	Ruminococcaceae	Oscillibacter	Unassigned
ASV622	0	0	0	0	0	0	0	0	0	0	0	0	0	0	0	0	0	0	2	0	0	0	0	0	0	0	0	0	0	0	0	0	0	0	0	0	0	0	0	0	2	Bacteria{superkingdom}(100);Bacteroidetes{phylum}(100);Bacteroidia{class}(100);Bacteroidales{order}(100);Prevotellaceae{family}(100);Prevotella{genus}(100);Unassigned{species}(0)	Bacteria	Bacteroidetes	Bacteroidia	Bacteroidales	Prevotellaceae	Prevotella	Unassigned
ASV623	0	0	0	4	0	0	0	0	0	0	0	0	0	0	0	0	0	5	4	0	0	0	0	3	0	0	5	0	0	0	0	2	0	25	0	0	0	10	0	0	58	Bacteria{superkingdom}(87);Firmicutes{phylum}(87);Clostridia{class}(87);Clostridiales{order}(87);Ruminococcaceae{family}(87);Intestinimonas{genus}(87);uncultured_bacterium{species}(87)	Bacteria	Firmicutes	Clostridia	Clostridiales	Ruminococcaceae	Intestinimonas	uncultured_bacterium
ASV626	0	0	0	0	0	0	0	0	0	0	0	0	9	0	0	0	0	0	0	0	0	0	0	0	0	0	0	10	0	0	0	0	0	0	0	0	0	0	0	0	19	Bacteria{superkingdom}(99);Firmicutes{phylum}(99);Clostridia{class}(99);Clostridiales{order}(99);Lachnospiraceae{family}(99);Blautia{genus}(99);Unassigned{species}(0)	Bacteria	Firmicutes	Clostridia	Clostridiales	Lachnospiraceae	Blautia	Unassigned
ASV630	0	0	0	0	0	0	4	0	0	0	0	5	0	0	0	0	8	0	13	0	0	0	0	0	0	0	8	0	0	0	0	0	0	0	0	4	0	0	0	0	42	Bacteria{superkingdom}(82);Firmicutes{phylum}(82);Clostridia{class}(82);Clostridiales{order}(82);Ruminococcaceae{family}(82);Sporobacter{genus}(82);uncultured_rumen_bacterium{species}(82)	Bacteria	Firmicutes	Clostridia	Clostridiales	Ruminococcaceae	Sporobacter	uncultured_rumen_bacterium
ASV631	0	0	0	0	0	0	0	0	0	0	0	0	0	0	0	0	3	0	0	0	0	0	0	0	0	0	0	0	0	0	0	0	24	6	0	2	0	5	0	0	40	Bacteria{superkingdom}(86);Proteobacteria{phylum}(86);Betaproteobacteria{class}(86);Burkholderiales{order}(86);Oxalobacteraceae{family}(86);Oxalobacter{genus}(86);uncultured_bacterium{species}(86)	Bacteria	Proteobacteria	Betaproteobacteria	Burkholderiales	Oxalobacteraceae	Oxalobacter	uncultured_bacterium
ASV633	0	0	0	0	0	0	0	0	0	0	0	0	0	0	0	0	0	0	60	0	0	0	0	0	0	0	0	0	0	0	0	0	75	0	0	0	0	0	0	0	135	Bacteria{superkingdom}(100);Firmicutes{phylum}(100);{class}(100);{order}(100);{family}(100);{genus}(100);uncultured_Bacteroidetes_bacterium{species}(100)	Bacteria	Firmicutes					uncultured_Bacteroidetes_bacterium
ASV634	0	0	0	0	0	0	0	0	0	0	0	0	0	0	0	0	0	0	0	0	0	0	0	0	0	0	0	0	0	0	0	0	0	0	102	0	0	0	0	0	102	Bacteria{superkingdom}(100);Proteobacteria{phylum}(100);Gammaproteobacteria{class}(100);Enterobacteriales{order}(100);Enterobacteriaceae{family}(100);Escherichia/Shigella{genus}(100);Unassigned{species}(0)	Bacteria	Proteobacteria	Gammaproteobacteria	Enterobacteriales	Enterobacteriaceae	Escherichia/Shigella	Unassigned
ASV635	0	0	0	0	0	0	6	0	0	0	0	0	0	0	0	0	0	0	31	0	0	0	0	0	0	0	16	0	0	0	0	0	15	0	0	0	0	0	0	0	68	Bacteria{superkingdom}(99);Firmicutes{phylum}(99);Clostridia{class}(99);Clostridiales{order}(99);Ruminococcaceae{family}(99);{genus}(99);Unassigned{species}(0)	Bacteria	Firmicutes	Clostridia	Clostridiales	Ruminococcaceae		Unassigned
ASV636	0	0	0	0	0	0	0	0	0	0	0	0	0	0	0	0	0	0	0	0	0	21	0	0	0	0	0	0	0	0	0	0	131	0	0	0	0	0	0	0	152	Bacteria{superkingdom}(100);Bacteroidetes{phylum}(100);Bacteroidia{class}(100);Bacteroidales{order}(100);Rikenellaceae{family}(100);Alistipes{genus}(100);Unassigned{species}(0)	Bacteria	Bacteroidetes	Bacteroidia	Bacteroidales	Rikenellaceae	Alistipes	Unassigned
ASV637	0	0	0	0	0	0	0	0	0	0	0	0	0	0	0	0	0	0	0	0	0	50	137	0	0	0	0	0	8	0	0	0	0	0	0	0	0	0	0	0	195	Bacteria{superkingdom}(90);Proteobacteria{phylum}(90);Gammaproteobacteria{class}(90);Enterobacteriales{order}(90);Enterobacteriaceae{family}(90);Enterobacter{genus}(90);Unassigned{species}(0)	Bacteria	Proteobacteria	Gammaproteobacteria	Enterobacteriales	Enterobacteriaceae	Enterobacter	Unassigned
ASV640	0	0	0	0	0	0	0	0	0	0	0	0	0	0	0	0	0	0	12	0	0	0	0	0	0	0	0	0	0	0	0	0	0	0	0	0	0	0	0	0	12	Bacteria{superkingdom}(100);Firmicutes{phylum}(100);Clostridia{class}(100);Clostridiales{order}(100);{family}(100);{genus}(100);bacterium_enrichment_culture_clone_PCE9_C5{species}(100)	Bacteria	Firmicutes	Clostridia	Clostridiales			bacterium_enrichment_culture_clone_PCE9_C5
ASV642	0	0	0	0	0	0	0	0	0	0	127	40	0	0	0	0	0	0	0	0	0	0	0	0	0	0	0	0	0	0	94	0	0	0	0	0	0	0	0	0	261	Bacteria{superkingdom}(100);Firmicutes{phylum}(100);Clostridia{class}(100);Clostridiales{order}(100);Lachnospiraceae{family}(100);Lachnospiracea_incertae_sedis{genus}(100);Unassigned{species}(0)	Bacteria	Firmicutes	Clostridia	Clostridiales	Lachnospiraceae	Lachnospiracea_incertae_sedis	Unassigned
ASV643	0	0	0	0	0	0	0	0	0	0	0	0	0	0	0	0	0	0	0	0	0	0	0	0	0	0	0	0	0	0	0	0	102	0	0	0	0	0	0	0	102	Bacteria{superkingdom}(100);Firmicutes{phylum}(100);Negativicutes{class}(100);Selenomonadales{order}(100);Acidaminococcaceae{family}(100);Phascolarctobacterium{genus}(100);Unassigned{species}(0)	Bacteria	Firmicutes	Negativicutes	Selenomonadales	Acidaminococcaceae	Phascolarctobacterium	Unassigned
ASV644	0	0	0	0	0	0	0	0	0	0	0	0	0	0	0	0	0	0	38	0	0	0	0	0	0	0	54	0	0	0	0	0	39	0	0	0	0	0	0	0	131	Bacteria{superkingdom}(100);Bacteroidetes{phylum}(100);Bacteroidia{class}(100);Bacteroidales{order}(100);Rikenellaceae{family}(100);Alistipes{genus}(100);Unassigned{species}(0)	Bacteria	Bacteroidetes	Bacteroidia	Bacteroidales	Rikenellaceae	Alistipes	Unassigned
ASV645	49	0	0	0	0	0	0	0	0	0	0	52	0	0	0	30	0	4	0	0	0	0	0	0	0	0	0	0	15	0	0	0	0	0	0	0	19	0	0	0	169	Bacteria{superkingdom}(100);Firmicutes{phylum}(100);Clostridia{class}(100);Clostridiales{order}(100);Ruminococcaceae{family}(100);Butyricicoccus{genus}(100);Unassigned{species}(0)	Bacteria	Firmicutes	Clostridia	Clostridiales	Ruminococcaceae	Butyricicoccus	Unassigned
ASV649	0	82	0	0	0	0	0	0	0	0	0	0	0	0	0	0	0	0	0	0	77	0	0	0	0	0	0	0	0	0	0	0	0	14	0	0	0	0	0	0	173	Bacteria{superkingdom}(88);Bacteroidetes{phylum}(88);Bacteroidia{class}(88);Bacteroidales{order}(88);Porphyromonadaceae{family}(88);Parabacteroides{genus}(88);Parabacteroides_distasonis{species}(88)	Bacteria	Bacteroidetes	Bacteroidia	Bacteroidales	Porphyromonadaceae	Parabacteroides	Parabacteroides_distasonis
ASV650	0	0	0	0	0	0	38	0	0	0	0	0	0	0	0	0	0	0	0	0	0	0	0	0	0	0	158	0	0	0	0	0	0	57	0	0	0	0	0	0	253	Bacteria{superkingdom}(100);Bacteroidetes{phylum}(100);Bacteroidia{class}(100);Bacteroidales{order}(100);Porphyromonadaceae{family}(100);Barnesiella{genus}(100);Unassigned{species}(0)	Bacteria	Bacteroidetes	Bacteroidia	Bacteroidales	Porphyromonadaceae	Barnesiella	Unassigned
ASV651	0	0	0	0	0	0	0	0	0	0	0	0	0	0	0	0	0	0	0	0	0	0	0	0	0	0	0	0	808	0	0	0	0	0	0	0	0	0	0	0	808	Bacteria{superkingdom}(100);Bacteroidetes{phylum}(100);Bacteroidia{class}(100);Bacteroidales{order}(100);Bacteroidaceae{family}(100);Bacteroides{genus}(100);Unassigned{species}(0)	Bacteria	Bacteroidetes	Bacteroidia	Bacteroidales	Bacteroidaceae	Bacteroides	Unassigned
ASV652	0	0	0	0	0	0	0	0	0	0	0	0	0	0	0	0	0	0	0	0	0	0	0	0	0	0	3	0	0	0	0	0	0	0	0	0	0	12	0	0	15	Bacteria{superkingdom}(100);Firmicutes{phylum}(100);Clostridia{class}(100);Clostridiales{order}(100);Ruminococcaceae{family}(100);{genus}(100);Unassigned{species}(0)	Bacteria	Firmicutes	Clostridia	Clostridiales	Ruminococcaceae		Unassigned
ASV653	0	0	0	0	0	0	0	0	0	0	0	0	0	837	0	0	0	0	0	0	0	0	0	0	0	0	0	0	0	0	0	0	0	0	9	0	0	0	0	0	846	Bacteria{superkingdom}(100);Firmicutes{phylum}(100);Bacilli{class}(100);Lactobacillales{order}(100);Leuconostocaceae{family}(100);Leuconostoc{genus}(100);Unassigned{species}(0)	Bacteria	Firmicutes	Bacilli	Lactobacillales	Leuconostocaceae	Leuconostoc	Unassigned
ASV654	0	0	0	0	0	0	0	0	0	0	0	0	0	0	0	0	0	0	150	0	0	0	0	0	0	0	0	0	0	0	0	0	0	0	0	0	0	0	0	0	150	Bacteria{superkingdom}(100);Firmicutes{phylum}(100);Clostridia{class}(100);Clostridiales{order}(100);Lachnospiraceae{family}(100);Unassigned{genus}(0);Unassigned{species}(0)	Bacteria	Firmicutes	Clostridia	Clostridiales	Lachnospiraceae	Unassigned	Unassigned
ASV655	0	0	0	33	67	0	0	0	0	47	0	0	0	0	0	0	0	0	0	0	0	16	0	0	51	0	0	0	0	0	0	0	0	0	0	0	0	0	0	0	214	Bacteria{superkingdom}(100);Firmicutes{phylum}(100);Clostridia{class}(100);Clostridiales{order}(100);Ruminococcaceae{family}(100);Butyricicoccus{genus}(100);Unassigned{species}(0)	Bacteria	Firmicutes	Clostridia	Clostridiales	Ruminococcaceae	Butyricicoccus	Unassigned
ASV656	0	0	0	0	0	0	0	0	0	104	0	0	0	0	0	0	0	0	0	0	0	0	0	0	0	0	0	0	0	158	0	0	19	0	0	0	0	0	0	0	281	Bacteria{superkingdom}(100);Proteobacteria{phylum}(100);Betaproteobacteria{class}(100);Burkholderiales{order}(100);Sutterellaceae{family}(100);Sutterella{genus}(100);Unassigned{species}(0)	Bacteria	Proteobacteria	Betaproteobacteria	Burkholderiales	Sutterellaceae	Sutterella	Unassigned
ASV660	0	4	0	0	0	0	0	0	0	8	0	0	0	10	0	0	0	0	0	0	0	0	0	0	0	0	0	0	0	0	0	0	0	15	5	19	0	22	13	0	96	Bacteria{superkingdom}(98);Firmicutes{phylum}(98);Clostridia{class}(98);Clostridiales{order}(98);Lachnospiraceae{family}(98);Lachnospiracea_incertae_sedis{genus}(98);uncultured_Lachnospira_sp.{species}(98)	Bacteria	Firmicutes	Clostridia	Clostridiales	Lachnospiraceae	Lachnospiracea_incertae_sedis	uncultured_Lachnospira_sp.
ASV661	0	0	0	0	0	0	0	0	0	0	0	0	0	0	0	0	0	0	0	0	0	0	0	0	0	0	37	0	0	0	0	0	0	0	0	0	0	0	0	0	37	Bacteria{superkingdom}(100);Firmicutes{phylum}(100);Clostridia{class}(100);Clostridiales{order}(100);Ruminococcaceae{family}(100);{genus}(100);Unassigned{species}(0)	Bacteria	Firmicutes	Clostridia	Clostridiales	Ruminococcaceae		Unassigned
ASV662	48	0	0	151	232	0	0	0	0	0	0	0	0	0	0	0	0	0	0	0	0	0	0	183	199	0	0	0	0	0	0	0	0	0	0	0	0	0	0	0	813	Bacteria{superkingdom}(100);Firmicutes{phylum}(100);Clostridia{class}(100);Clostridiales{order}(100);Lachnospiraceae{family}(100);Dorea{genus}(100);Unassigned{species}(0)	Bacteria	Firmicutes	Clostridia	Clostridiales	Lachnospiraceae	Dorea	Unassigned
ASV665	0	0	0	0	0	0	0	0	0	0	0	0	0	0	0	0	0	0	0	0	0	0	0	0	0	0	0	0	0	0	0	0	74	0	0	0	0	0	0	0	74	Bacteria{superkingdom}(100);Firmicutes{phylum}(100);{class}(100);{order}(100);{family}(100);{genus}(100);uncultured_Bacteroidetes_bacterium{species}(100)	Bacteria	Firmicutes					uncultured_Bacteroidetes_bacterium
ASV669	0	0	0	0	0	0	0	0	0	0	0	0	0	0	0	0	0	0	0	0	0	0	0	0	0	0	0	0	0	0	0	0	446	44	0	0	0	0	0	0	490	Bacteria{superkingdom}(100);Firmicutes{phylum}(100);Clostridia{class}(100);Clostridiales{order}(100);Lachnospiraceae{family}(100);Blautia{genus}(100);Unassigned{species}(0)	Bacteria	Firmicutes	Clostridia	Clostridiales	Lachnospiraceae	Blautia	Unassigned
ASV670	104	0	0	0	0	0	0	0	0	0	0	0	0	0	0	0	0	0	0	0	0	0	0	0	0	0	0	0	0	0	47	0	0	0	0	0	0	0	0	0	151	Bacteria{superkingdom}(100);Firmicutes{phylum}(100);Clostridia{class}(100);Clostridiales{order}(100);Ruminococcaceae{family}(100);Butyricicoccus{genus}(100);Unassigned{species}(0)	Bacteria	Firmicutes	Clostridia	Clostridiales	Ruminococcaceae	Butyricicoccus	Unassigned
ASV672	0	0	0	0	0	0	0	0	0	0	0	0	0	0	0	0	0	0	77	0	0	0	0	0	0	0	0	0	0	0	0	0	0	0	0	0	0	0	0	0	77	Bacteria{superkingdom}(100);Bacteroidetes{phylum}(100);Bacteroidia{class}(100);Bacteroidales{order}(100);Prevotellaceae{family}(100);Prevotella{genus}(100);Unassigned{species}(0)	Bacteria	Bacteroidetes	Bacteroidia	Bacteroidales	Prevotellaceae	Prevotella	Unassigned
ASV675	0	33	0	0	0	0	0	0	0	0	0	0	0	46	0	0	0	0	0	0	33	0	0	0	0	0	0	0	0	0	0	0	0	0	9	10	0	0	17	0	148	Bacteria{superkingdom}(100);Firmicutes{phylum}(100);Clostridia{class}(100);Clostridiales{order}(100);Lachnospiraceae{family}(100);Clostridium_XlVa{genus}(100);Unassigned{species}(0)	Bacteria	Firmicutes	Clostridia	Clostridiales	Lachnospiraceae	Clostridium_XlVa	Unassigned
ASV678	0	0	0	0	0	0	0	0	0	0	0	0	0	0	0	0	0	0	0	0	0	282	0	0	0	0	0	0	0	0	0	0	0	0	0	0	0	0	0	0	282	Bacteria{superkingdom}(100);Firmicutes{phylum}(100);Erysipelotrichia{class}(100);Erysipelotrichales{order}(100);Erysipelotrichaceae{family}(100);Bulleidia{genus}(100);uncultured_bacterium{species}(100)	Bacteria	Firmicutes	Erysipelotrichia	Erysipelotrichales	Erysipelotrichaceae	Bulleidia	uncultured_bacterium
ASV679	0	0	0	0	0	0	0	0	0	0	0	0	0	0	0	0	0	0	30	0	0	0	0	0	0	0	0	0	0	0	0	0	0	0	0	0	0	0	0	0	30	Bacteria{superkingdom}(100);Firmicutes{phylum}(100);Clostridia{class}(100);Clostridiales{order}(100);Ruminococcaceae{family}(100);{genus}(100);uncultured_bacterium_adhufec108{species}(100)	Bacteria	Firmicutes	Clostridia	Clostridiales	Ruminococcaceae		uncultured_bacterium_adhufec108
ASV680	0	0	0	0	0	7	0	0	0	0	0	0	0	7	0	0	0	0	0	0	0	0	0	0	0	4	0	0	0	0	0	0	26	0	0	0	0	0	0	0	44	Bacteria{superkingdom}(94);Bacteroidetes{phylum}(94);Bacteroidia{class}(94);Bacteroidales{order}(94);Porphyromonadaceae{family}(94);Parabacteroides{genus}(94);Parabacteroides_goldsteinii{species}(94)	Bacteria	Bacteroidetes	Bacteroidia	Bacteroidales	Porphyromonadaceae	Parabacteroides	Parabacteroides_goldsteinii
ASV686	0	0	0	0	0	0	0	0	0	0	0	0	0	0	0	0	0	0	132	0	0	0	0	0	0	0	0	0	0	0	0	0	0	0	0	0	0	0	0	0	132	Bacteria{superkingdom}(98);Firmicutes{phylum}(98);{class}(98);{order}(98);{family}(98);{genus}(98);uncultured_Firmicutes_bacterium{species}(98)	Bacteria	Firmicutes					uncultured_Firmicutes_bacterium
ASV689	0	0	0	0	0	0	0	0	0	189	0	0	0	0	113	0	0	0	0	0	0	0	0	0	0	0	0	0	0	78	0	0	0	50	0	0	0	0	0	0	430	Bacteria{superkingdom}(95);Firmicutes{phylum}(95);Clostridia{class}(95);Clostridiales{order}(95);Lachnospiraceae{family}(95);Lachnospiracea_incertae_sedis{genus}(95);uncultured_Eubacteriaceae_bacterium{species}(95)	Bacteria	Firmicutes	Clostridia	Clostridiales	Lachnospiraceae	Lachnospiracea_incertae_sedis	uncultured_Eubacteriaceae_bacterium
ASV691	0	0	0	0	0	0	0	0	0	0	0	0	0	0	0	0	0	0	0	0	0	240	0	0	0	0	0	0	0	0	0	0	0	0	0	0	0	0	0	0	240	Bacteria{superkingdom}(95);Firmicutes{phylum}(95);Clostridia{class}(95);Clostridiales{order}(95);Lachnospiraceae{family}(95);Lachnospiracea_incertae_sedis{genus}(95);Unassigned{species}(0)	Bacteria	Firmicutes	Clostridia	Clostridiales	Lachnospiraceae	Lachnospiracea_incertae_sedis	Unassigned
ASV692	0	0	0	0	0	0	0	0	0	0	0	0	0	0	33	0	0	0	0	0	0	0	0	0	0	0	0	0	0	0	0	0	0	0	0	0	0	0	0	0	33	Bacteria{superkingdom}(100);Firmicutes{phylum}(100);Bacilli{class}(100);Lactobacillales{order}(100);Lactobacillaceae{family}(100);Lactobacillus{genus}(100);Unassigned{species}(0)	Bacteria	Firmicutes	Bacilli	Lactobacillales	Lactobacillaceae	Lactobacillus	Unassigned
ASV695	0	5	0	0	0	0	0	0	0	0	0	0	0	0	0	0	0	0	0	0	0	0	0	0	0	0	0	0	0	28	10	0	0	0	0	0	0	0	0	0	43	Bacteria{superkingdom}(97);Bacteroidetes{phylum}(97);Bacteroidia{class}(97);Bacteroidales{order}(97);Porphyromonadaceae{family}(97);Porphyromonas{genus}(97);Porphyromonas_asaccharolytica{species}(97)	Bacteria	Bacteroidetes	Bacteroidia	Bacteroidales	Porphyromonadaceae	Porphyromonas	Porphyromonas_asaccharolytica
ASV696	0	0	0	0	0	0	0	0	0	0	0	0	0	0	0	0	0	6	0	0	0	0	0	0	0	0	0	0	0	0	0	0	0	0	0	0	0	0	0	0	6	Bacteria{superkingdom}(99);Proteobacteria{phylum}(99);Betaproteobacteria{class}(99);Burkholderiales{order}(99);Sutterellaceae{family}(99);Sutterella{genus}(99);Sutterella_wadsworthensis{species}(99)	Bacteria	Proteobacteria	Betaproteobacteria	Burkholderiales	Sutterellaceae	Sutterella	Sutterella_wadsworthensis
ASV697	0	0	0	0	0	0	0	0	0	0	0	0	0	0	221	0	0	0	0	0	0	0	0	0	0	0	0	0	0	0	0	0	0	0	0	0	0	0	0	0	221	Bacteria{superkingdom}(100);Firmicutes{phylum}(100);Clostridia{class}(100);Clostridiales{order}(100);Lachnospiraceae{family}(100);Lachnospiracea_incertae_sedis{genus}(100);Unassigned{species}(0)	Bacteria	Firmicutes	Clostridia	Clostridiales	Lachnospiraceae	Lachnospiracea_incertae_sedis	Unassigned
ASV698	0	0	0	0	0	0	0	0	6	0	0	0	0	0	0	0	0	0	0	0	0	112	0	0	0	0	0	0	57	0	0	0	0	0	0	0	0	0	0	0	175	Bacteria{superkingdom}(100);Firmicutes{phylum}(100);Clostridia{class}(100);Clostridiales{order}(100);Ruminococcaceae{family}(100);Ruminococcus{genus}(100);Unassigned{species}(0)	Bacteria	Firmicutes	Clostridia	Clostridiales	Ruminococcaceae	Ruminococcus	Unassigned
ASV701	0	0	3	40	0	0	0	0	0	0	0	0	0	0	0	42	0	0	0	0	0	0	0	15	0	0	0	0	0	0	0	0	0	0	0	0	0	0	0	0	100	Bacteria{superkingdom}(91);Proteobacteria{phylum}(91);Gammaproteobacteria{class}(91);Enterobacteriales{order}(91);Enterobacteriaceae{family}(91);Klebsiella{genus}(91);Unassigned{species}(0)	Bacteria	Proteobacteria	Gammaproteobacteria	Enterobacteriales	Enterobacteriaceae	Klebsiella	Unassigned
ASV702	0	0	0	0	20	0	0	0	0	16	0	0	0	0	0	0	0	0	8	20	24	0	0	0	21	25	44	42	49	36	27	0	14	0	0	0	0	0	0	16	362	Bacteria{superkingdom}(100);Firmicutes{phylum}(100);Clostridia{class}(100);Clostridiales{order}(100);Lachnospiraceae{family}(100);Unassigned{genus}(0);Unassigned{species}(0)	Bacteria	Firmicutes	Clostridia	Clostridiales	Lachnospiraceae	Unassigned	Unassigned
ASV705	0	0	0	0	0	0	0	0	0	0	0	0	0	0	0	0	0	0	0	0	0	254	0	0	0	0	0	0	0	0	0	0	0	0	0	0	0	0	0	0	254	Bacteria{superkingdom}(100);Bacteroidetes{phylum}(100);Bacteroidia{class}(100);Bacteroidales{order}(100);Porphyromonadaceae{family}(100);{genus}(100);uncultured_Firmicutes_bacterium{species}(100)	Bacteria	Bacteroidetes	Bacteroidia	Bacteroidales	Porphyromonadaceae		uncultured_Firmicutes_bacterium
ASV708	0	0	0	0	0	39	0	0	0	0	0	0	0	0	0	0	0	0	0	0	0	0	0	0	0	45	1	0	0	0	0	0	0	0	0	15	0	0	0	0	100	Bacteria{superkingdom}(91);Bacteroidetes{phylum}(91);Bacteroidia{class}(91);Bacteroidales{order}(91);Bacteroidaceae{family}(91);Bacteroides{genus}(91);Bacteroides_plebeius{species}(91)	Bacteria	Bacteroidetes	Bacteroidia	Bacteroidales	Bacteroidaceae	Bacteroides	Bacteroides_plebeius
ASV709	34	9	0	0	0	7	0	0	60	0	0	0	0	11	0	0	0	0	0	0	18	13	28	26	1	0	8	0	0	0	0	0	0	12	8	0	0	4	0	0	239	Bacteria{superkingdom}(100);Firmicutes{phylum}(100);Bacilli{class}(100);Lactobacillales{order}(100);Streptococcaceae{family}(100);Streptococcus{genus}(100);Unassigned{species}(0)	Bacteria	Firmicutes	Bacilli	Lactobacillales	Streptococcaceae	Streptococcus	Unassigned
ASV713	0	192	0	0	0	0	0	0	0	47	0	0	0	0	0	0	0	0	0	0	145	0	0	0	0	0	0	0	0	302	0	0	0	27	0	0	0	0	0	0	713	Bacteria{superkingdom}(100);Bacteroidetes{phylum}(100);Bacteroidia{class}(100);Bacteroidales{order}(100);Porphyromonadaceae{family}(100);Parabacteroides{genus}(100);Unassigned{species}(0)	Bacteria	Bacteroidetes	Bacteroidia	Bacteroidales	Porphyromonadaceae	Parabacteroides	Unassigned
ASV716	0	0	0	0	0	0	0	0	0	0	0	0	0	0	0	0	0	0	0	0	0	0	0	0	0	0	0	0	0	0	0	0	0	0	0	0	66	0	0	0	66	Bacteria{superkingdom}(100);Bacteroidetes{phylum}(100);Bacteroidia{class}(100);Bacteroidales{order}(100);Porphyromonadaceae{family}(100);Unassigned{genus}(0);Unassigned{species}(0)	Bacteria	Bacteroidetes	Bacteroidia	Bacteroidales	Porphyromonadaceae	Unassigned	Unassigned
ASV719	0	0	0	0	0	0	0	0	0	36	0	0	0	0	0	0	0	0	0	0	0	0	0	2	0	0	0	0	0	524	0	0	0	0	0	43	0	0	0	0	605	Bacteria{superkingdom}(100);Firmicutes{phylum}(100);Clostridia{class}(100);Clostridiales{order}(100);Ruminococcaceae{family}(100);Ruminococcus{genus}(100);Unassigned{species}(0)	Bacteria	Firmicutes	Clostridia	Clostridiales	Ruminococcaceae	Ruminococcus	Unassigned
ASV721	0	0	0	0	0	0	125	0	0	0	0	0	0	0	0	0	0	0	0	0	0	0	0	0	0	0	22	0	0	0	0	0	0	0	0	0	0	0	0	0	147	Bacteria{superkingdom}(100);Bacteroidetes{phylum}(100);Bacteroidia{class}(100);Bacteroidales{order}(100);Prevotellaceae{family}(100);Prevotella{genus}(100);Unassigned{species}(0)	Bacteria	Bacteroidetes	Bacteroidia	Bacteroidales	Prevotellaceae	Prevotella	Unassigned
ASV723	0	0	0	0	0	0	0	0	0	0	0	0	0	0	0	327	0	0	0	0	0	0	0	0	0	0	0	0	0	0	0	0	0	0	0	0	66	0	0	0	393	Bacteria{superkingdom}(100);Firmicutes{phylum}(100);Clostridia{class}(100);Clostridiales{order}(100);Lachnospiraceae{family}(100);Dorea{genus}(100);Unassigned{species}(0)	Bacteria	Firmicutes	Clostridia	Clostridiales	Lachnospiraceae	Dorea	Unassigned
ASV724	0	0	0	0	0	36	0	0	0	0	0	0	0	0	0	0	0	38	0	0	0	50	0	0	0	34	0	0	0	0	0	0	0	22	0	0	0	0	0	0	180	Bacteria{superkingdom}(100);Firmicutes{phylum}(100);Clostridia{class}(100);Clostridiales{order}(100);Ruminococcaceae{family}(100);Anaerobacterium{genus}(100);Unassigned{species}(0)	Bacteria	Firmicutes	Clostridia	Clostridiales	Ruminococcaceae	Anaerobacterium	Unassigned
ASV726	0	0	0	0	0	0	0	0	0	0	0	0	0	14	0	0	0	0	0	0	0	0	0	0	0	0	0	0	0	0	0	0	0	0	0	0	0	18	0	0	32	Bacteria{superkingdom}(97);Bacteroidetes{phylum}(97);Bacteroidia{class}(97);Bacteroidales{order}(97);Bacteroidaceae{family}(97);Bacteroides{genus}(97);Bacteroides_ovatus{species}(97)	Bacteria	Bacteroidetes	Bacteroidia	Bacteroidales	Bacteroidaceae	Bacteroides	Bacteroides_ovatus
ASV728	0	0	0	0	0	0	0	0	0	0	0	0	0	0	0	0	29	0	0	0	0	0	0	0	0	0	0	0	0	0	0	0	0	0	0	0	0	64	0	0	93	Bacteria{superkingdom}(100);Firmicutes{phylum}(100);Clostridia{class}(100);Clostridiales{order}(100);Lachnospiraceae{family}(100);Unassigned{genus}(0);Unassigned{species}(0)	Bacteria	Firmicutes	Clostridia	Clostridiales	Lachnospiraceae	Unassigned	Unassigned
ASV730	0	0	0	0	128	0	0	0	0	0	0	0	0	0	0	0	0	0	0	0	0	0	0	0	150	0	0	0	0	0	0	0	0	0	0	0	0	0	0	0	278	Bacteria{superkingdom}(100);Firmicutes{phylum}(100);Clostridia{class}(100);Clostridiales{order}(100);Lachnospiraceae{family}(100);Blautia{genus}(100);Unassigned{species}(0)	Bacteria	Firmicutes	Clostridia	Clostridiales	Lachnospiraceae	Blautia	Unassigned
ASV731	0	0	0	0	0	0	0	0	0	0	0	0	0	0	0	0	0	0	0	0	0	0	0	0	0	0	0	0	0	0	0	0	0	0	0	0	697	0	0	0	697	Bacteria{superkingdom}(96);Firmicutes{phylum}(96);Clostridia{class}(96);Clostridiales{order}(96);Ruminococcaceae{family}(96);Ruminococcus{genus}(96);Ruminococcus_bromii{species}(96)	Bacteria	Firmicutes	Clostridia	Clostridiales	Ruminococcaceae	Ruminococcus	Ruminococcus_bromii
ASV732	0	0	0	27	6	0	0	0	0	0	0	0	0	0	0	0	0	0	0	0	0	0	0	0	0	0	0	0	0	0	0	0	0	0	0	0	0	0	0	0	33	Bacteria{superkingdom}(89);Bacteroidetes{phylum}(89);Bacteroidia{class}(89);Bacteroidales{order}(89);Porphyromonadaceae{family}(89);Parabacteroides{genus}(89);Parabacteroides_distasonis{species}(89)	Bacteria	Bacteroidetes	Bacteroidia	Bacteroidales	Porphyromonadaceae	Parabacteroides	Parabacteroides_distasonis
ASV733	0	0	0	0	0	0	0	0	0	0	0	0	0	117	0	0	0	0	0	0	0	0	0	0	0	0	0	0	0	0	0	0	0	0	79	0	0	0	0	0	196	Bacteria{superkingdom}(100);Firmicutes{phylum}(100);Clostridia{class}(100);Clostridiales{order}(100);Ruminococcaceae{family}(100);Ruminococcus{genus}(100);Unassigned{species}(0)	Bacteria	Firmicutes	Clostridia	Clostridiales	Ruminococcaceae	Ruminococcus	Unassigned
ASV734	0	4	0	0	0	0	0	0	0	0	0	0	0	0	0	0	0	0	0	0	0	33	0	0	0	0	0	0	0	0	0	0	0	35	0	0	0	0	0	0	72	Bacteria{superkingdom}(97);Firmicutes{phylum}(97);Clostridia{class}(97);Clostridiales{order}(97);Lachnospiraceae{family}(97);Lachnospiracea_incertae_sedis{genus}(97);Eubacterium_eligens_ATCC_27750{species}(97)	Bacteria	Firmicutes	Clostridia	Clostridiales	Lachnospiraceae	Lachnospiracea_incertae_sedis	Eubacterium_eligens_ATCC_27750
ASV735	0	0	0	0	0	0	0	0	0	0	0	86	0	0	0	0	0	0	0	0	0	0	0	0	0	0	0	0	0	0	0	68	0	0	0	0	0	128	0	0	282	Bacteria{superkingdom}(100);Bacteroidetes{phylum}(100);Bacteroidia{class}(100);Bacteroidales{order}(100);Porphyromonadaceae{family}(100);Parabacteroides{genus}(100);Unassigned{species}(0)	Bacteria	Bacteroidetes	Bacteroidia	Bacteroidales	Porphyromonadaceae	Parabacteroides	Unassigned
ASV736	0	0	0	0	0	53	0	0	0	0	0	0	0	0	0	7	0	0	0	0	0	0	0	0	0	106	0	0	5	0	0	0	0	0	0	0	66	0	0	0	237	Bacteria{superkingdom}(100);Actinobacteria{phylum}(100);Actinobacteria{class}(100);Coriobacteriales{order}(100);Coriobacteriaceae{family}(100);Unassigned{genus}(0);Unassigned{species}(0)	Bacteria	Actinobacteria	Actinobacteria	Coriobacteriales	Coriobacteriaceae	Unassigned	Unassigned
ASV737	0	0	0	0	0	0	0	0	0	0	0	0	0	0	0	0	0	0	0	0	0	0	0	0	0	0	0	0	0	0	0	0	0	81	0	0	0	0	0	0	81	Bacteria{superkingdom}(87);Firmicutes{phylum}(87);Bacilli{class}(87);Lactobacillales{order}(87);Lactobacillaceae{family}(87);Lactobacillus{genus}(87);Lactobacillus_ruminis{species}(87)	Bacteria	Firmicutes	Bacilli	Lactobacillales	Lactobacillaceae	Lactobacillus	Lactobacillus_ruminis
ASV739	0	0	0	0	0	0	0	0	0	0	0	0	0	0	0	0	0	0	0	0	0	0	0	0	0	0	0	0	0	0	0	0	254	0	0	0	0	0	0	0	254	Bacteria{superkingdom}(100);Bacteroidetes{phylum}(100);Bacteroidia{class}(100);Bacteroidales{order}(100);Porphyromonadaceae{family}(100);Barnesiella{genus}(100);Unassigned{species}(0)	Bacteria	Bacteroidetes	Bacteroidia	Bacteroidales	Porphyromonadaceae	Barnesiella	Unassigned
ASV740	0	0	0	0	0	0	0	156	0	57	0	0	0	0	0	0	0	0	0	0	0	0	0	0	0	0	0	70	0	48	0	0	0	0	0	97	0	0	0	0	428	Bacteria{superkingdom}(100);Firmicutes{phylum}(100);Clostridia{class}(100);Clostridiales{order}(100);Lachnospiraceae{family}(100);Blautia{genus}(100);Unassigned{species}(0)	Bacteria	Firmicutes	Clostridia	Clostridiales	Lachnospiraceae	Blautia	Unassigned
ASV742	0	0	0	0	0	0	0	0	0	0	0	0	0	0	0	0	0	0	0	0	0	0	0	0	0	0	0	0	0	0	0	0	103	0	0	0	0	0	0	0	103	Bacteria{superkingdom}(100);Bacteroidetes{phylum}(100);Bacteroidia{class}(100);Bacteroidales{order}(100);Prevotellaceae{family}(100);Unassigned{genus}(0);Unassigned{species}(0)	Bacteria	Bacteroidetes	Bacteroidia	Bacteroidales	Prevotellaceae	Unassigned	Unassigned
ASV743	0	0	51	0	0	0	0	0	0	0	0	24	0	0	0	0	0	0	0	0	0	0	15	0	0	0	0	0	0	0	0	0	0	38	0	0	0	0	0	0	128	Bacteria{superkingdom}(100);Firmicutes{phylum}(100);Clostridia{class}(100);Clostridiales{order}(100);Peptostreptococcaceae{family}(100);Romboutsia{genus}(100);Unassigned{species}(0)	Bacteria	Firmicutes	Clostridia	Clostridiales	Peptostreptococcaceae	Romboutsia	Unassigned
ASV744	0	0	0	0	0	0	0	0	0	0	82	0	0	0	0	0	0	0	43	0	0	0	0	0	0	0	0	0	0	0	70	0	0	0	0	0	0	0	0	0	195	Bacteria{superkingdom}(94);Proteobacteria{phylum}(94);Deltaproteobacteria{class}(94);Desulfovibrionales{order}(94);Desulfovibrionaceae{family}(94);{genus}(94);uncultured_Desulfovibrio_sp.{species}(94)	Bacteria	Proteobacteria	Deltaproteobacteria	Desulfovibrionales	Desulfovibrionaceae		uncultured_Desulfovibrio_sp.
ASV746	0	0	0	0	0	0	0	0	0	0	0	0	0	0	0	0	0	0	0	0	0	0	0	0	0	0	0	0	0	0	0	0	651	0	0	0	0	0	0	0	651	Bacteria{superkingdom}(100);Bacteroidetes{phylum}(100);Bacteroidia{class}(100);Bacteroidales{order}(100);Porphyromonadaceae{family}(100);{genus}(100);uncultured_Firmicutes_bacterium{species}(100)	Bacteria	Bacteroidetes	Bacteroidia	Bacteroidales	Porphyromonadaceae		uncultured_Firmicutes_bacterium
ASV748	21	0	0	20	0	0	0	0	154	0	0	0	0	0	0	0	0	0	0	0	0	0	19	0	0	0	0	0	19	0	0	0	0	0	0	0	0	0	0	0	233	Bacteria{superkingdom}(100);Proteobacteria{phylum}(100);Gammaproteobacteria{class}(100);Pasteurellales{order}(100);Pasteurellaceae{family}(100);Haemophilus{genus}(100);Unassigned{species}(0)	Bacteria	Proteobacteria	Gammaproteobacteria	Pasteurellales	Pasteurellaceae	Haemophilus	Unassigned
ASV749	0	0	0	0	0	0	0	0	0	0	0	0	0	0	0	0	0	0	0	0	0	0	0	0	0	0	0	0	0	0	0	0	0	0	0	0	0	0	31	0	31	Bacteria{superkingdom}(100);Proteobacteria{phylum}(100);Gammaproteobacteria{class}(100);Pasteurellales{order}(100);Pasteurellaceae{family}(100);Haemophilus{genus}(100);Unassigned{species}(0)	Bacteria	Proteobacteria	Gammaproteobacteria	Pasteurellales	Pasteurellaceae	Haemophilus	Unassigned
ASV751	0	0	0	1	0	0	0	0	0	16	0	0	0	0	0	0	0	51	0	0	0	0	0	0	6	10	0	0	0	32	29	0	72	47	0	0	13	0	0	0	277	Bacteria{superkingdom}(100);Firmicutes{phylum}(100);Clostridia{class}(100);Clostridiales{order}(100);Clostridiales_Incertae_Sedis_XIII{family}(100);Anaerovorax{genus}(100);Unassigned{species}(0)	Bacteria	Firmicutes	Clostridia	Clostridiales	Clostridiales_Incertae_Sedis_XIII	Anaerovorax	Unassigned
ASV757	0	0	0	0	0	0	0	0	0	0	0	0	0	0	0	0	0	0	194	0	0	0	0	0	0	0	0	0	143	0	0	0	0	0	0	0	0	0	0	0	337	Bacteria{superkingdom}(80);Bacteroidetes{phylum}(80);Bacteroidia{class}(80);Bacteroidales{order}(80);Bacteroidaceae{family}(80);Bacteroides{genus}(80);Bacteroides_cellulosilyticus{species}(80)	Bacteria	Bacteroidetes	Bacteroidia	Bacteroidales	Bacteroidaceae	Bacteroides	Bacteroides_cellulosilyticus
ASV759	0	0	0	4	0	16	0	0	0	0	0	0	0	0	0	0	12	0	18	0	0	0	0	0	0	7	57	13	0	8	0	0	43	32	0	0	0	0	0	0	210	Bacteria{superkingdom}(82);Firmicutes{phylum}(82);Clostridia{class}(82);Clostridiales{order}(82);Ruminococcaceae{family}(82);Sporobacter{genus}(82);uncultured_bacterium{species}(82)	Bacteria	Firmicutes	Clostridia	Clostridiales	Ruminococcaceae	Sporobacter	uncultured_bacterium
ASV762	0	0	0	0	0	0	0	0	0	0	0	0	0	0	0	0	0	0	0	0	0	0	0	0	0	0	0	0	0	0	0	0	0	0	0	0	0	0	27	0	27	Bacteria{superkingdom}(100);Firmicutes{phylum}(100);Clostridia{class}(100);Clostridiales{order}(100);Lachnospiraceae{family}(100);Blautia{genus}(100);Unassigned{species}(0)	Bacteria	Firmicutes	Clostridia	Clostridiales	Lachnospiraceae	Blautia	Unassigned
ASV765	0	0	0	0	0	0	0	0	0	0	0	0	0	0	0	0	0	0	37	0	0	0	0	0	0	0	26	0	0	0	0	0	0	0	0	0	0	0	0	0	63	Bacteria{superkingdom}(86);Bacteroidetes{phylum}(86);Bacteroidia{class}(86);Bacteroidales{order}(86);Porphyromonadaceae{family}(86);Parabacteroides{genus}(86);Parabacteroides_distasonis{species}(86)	Bacteria	Bacteroidetes	Bacteroidia	Bacteroidales	Porphyromonadaceae	Parabacteroides	Parabacteroides_distasonis
ASV769	0	0	0	0	0	0	0	0	0	0	0	0	0	0	0	0	0	0	0	0	0	0	0	0	0	0	0	0	0	0	0	0	0	0	0	0	0	0	205	0	205	Bacteria{superkingdom}(92);Bacteroidetes{phylum}(92);Bacteroidia{class}(92);Bacteroidales{order}(92);Bacteroidaceae{family}(92);Bacteroides{genus}(92);Bacteroides_stercoris{species}(92)	Bacteria	Bacteroidetes	Bacteroidia	Bacteroidales	Bacteroidaceae	Bacteroides	Bacteroides_stercoris
ASV772	0	0	0	0	0	0	82	0	0	0	0	0	0	0	0	0	0	0	313	0	0	0	0	0	0	0	78	0	0	0	0	0	0	0	0	0	0	0	0	0	473	Bacteria{superkingdom}(100);Firmicutes{phylum}(100);Clostridia{class}(100);Clostridiales{order}(100);Lachnospiraceae{family}(100);Blautia{genus}(100);Unassigned{species}(0)	Bacteria	Firmicutes	Clostridia	Clostridiales	Lachnospiraceae	Blautia	Unassigned
ASV773	0	0	4	0	0	0	0	0	0	0	0	0	0	0	0	0	0	0	0	0	0	0	0	0	0	0	0	0	0	0	0	0	0	0	0	0	0	0	5	0	9	Bacteria{superkingdom}(97);Firmicutes{phylum}(97);Clostridia{class}(97);Clostridiales{order}(97);Clostridiaceae_1{family}(97);Clostridium_sensu_stricto{genus}(97);Clostridium_paraputrificum{species}(97)	Bacteria	Firmicutes	Clostridia	Clostridiales	Clostridiaceae_1	Clostridium_sensu_stricto	Clostridium_paraputrificum
ASV774	0	0	0	177	0	0	0	0	0	0	0	111	0	0	0	0	0	0	0	0	0	0	0	234	0	0	0	0	0	0	0	0	0	0	0	0	0	0	0	0	522	Bacteria{superkingdom}(100);Firmicutes{phylum}(100);Clostridia{class}(100);Clostridiales{order}(100);Lachnospiraceae{family}(100);Ruminococcus2{genus}(100);Unassigned{species}(0)	Bacteria	Firmicutes	Clostridia	Clostridiales	Lachnospiraceae	Ruminococcus2	Unassigned
ASV780	0	0	0	0	0	0	0	0	0	0	0	0	0	0	0	0	0	29	0	0	0	11	0	0	0	0	0	0	0	0	0	0	0	0	0	0	0	0	0	0	40	Bacteria{superkingdom}(100);Bacteroidetes{phylum}(100);Bacteroidia{class}(100);Bacteroidales{order}(100);Rikenellaceae{family}(100);Alistipes{genus}(100);Candidatus_Alistipes_marseilloanorexicus_AP11{species}(100)	Bacteria	Bacteroidetes	Bacteroidia	Bacteroidales	Rikenellaceae	Alistipes	Candidatus_Alistipes_marseilloanorexicus_AP11
ASV782	0	0	0	0	0	0	154	0	0	0	0	0	0	0	0	0	0	0	0	0	0	0	0	0	0	0	67	0	0	0	0	0	0	0	0	0	0	0	0	0	221	Bacteria{superkingdom}(100);Firmicutes{phylum}(100);Clostridia{class}(100);Clostridiales{order}(100);Ruminococcaceae{family}(100);Butyricicoccus{genus}(100);Unassigned{species}(0)	Bacteria	Firmicutes	Clostridia	Clostridiales	Ruminococcaceae	Butyricicoccus	Unassigned
ASV784	254	0	0	0	0	0	0	0	0	0	0	0	0	0	0	0	0	0	0	0	33	0	0	0	0	0	0	0	0	0	30	0	0	0	0	0	0	0	0	0	317	Bacteria{superkingdom}(89);Firmicutes{phylum}(89);Clostridia{class}(89);Clostridiales{order}(89);Lachnospiraceae{family}(89);{genus}(89);uncultured_bacterium_adhufec236{species}(89)	Bacteria	Firmicutes	Clostridia	Clostridiales	Lachnospiraceae		uncultured_bacterium_adhufec236
ASV785	13	0	0	0	0	0	0	0	0	0	0	53	0	0	0	0	0	0	0	0	0	0	0	0	0	0	0	0	0	0	0	47	0	0	0	0	0	0	0	0	113	Bacteria{superkingdom}(100);Firmicutes{phylum}(100);Clostridia{class}(100);Clostridiales{order}(100);Ruminococcaceae{family}(100);Unassigned{genus}(0);Unassigned{species}(0)	Bacteria	Firmicutes	Clostridia	Clostridiales	Ruminococcaceae	Unassigned	Unassigned
ASV786	0	111	0	21	0	34	0	0	0	0	0	0	0	17	0	0	0	0	0	0	138	0	0	81	0	32	0	27	0	11	5	0	0	3	68	0	6	0	0	0	554	Bacteria{superkingdom}(100);Firmicutes{phylum}(100);Clostridia{class}(100);Clostridiales{order}(100);Clostridiales_Incertae_Sedis_XIII{family}(100);Anaerovorax{genus}(100);uncultured_bacterium{species}(100)	Bacteria	Firmicutes	Clostridia	Clostridiales	Clostridiales_Incertae_Sedis_XIII	Anaerovorax	uncultured_bacterium
ASV787	0	0	0	51	0	0	0	0	0	0	0	0	0	0	0	0	0	0	0	0	0	0	0	0	0	0	0	0	0	0	0	0	0	0	0	0	0	0	0	0	51	Bacteria{superkingdom}(100);Actinobacteria{phylum}(100);Actinobacteria{class}(100);Coriobacteriales{order}(100);Coriobacteriaceae{family}(100);Senegalimassilia{genus}(100);uncultured_bacterium{species}(100)	Bacteria	Actinobacteria	Actinobacteria	Coriobacteriales	Coriobacteriaceae	Senegalimassilia	uncultured_bacterium
ASV788	0	0	0	0	0	7	0	0	0	0	0	27	0	0	0	0	0	0	26	0	0	0	0	0	0	6	0	7	10	0	0	4	0	4	0	0	0	0	0	9	100	Bacteria{superkingdom}(95);Firmicutes{phylum}(95);Clostridia{class}(95);Clostridiales{order}(95);Lachnospiraceae{family}(95);Lachnospiracea_incertae_sedis{genus}(95);Unassigned{species}(0)	Bacteria	Firmicutes	Clostridia	Clostridiales	Lachnospiraceae	Lachnospiracea_incertae_sedis	Unassigned
ASV792	0	0	0	0	0	0	0	0	0	0	0	0	0	0	0	0	0	0	0	217	0	0	0	0	0	0	0	0	0	0	0	0	0	0	0	14	0	0	0	128	359	Bacteria{superkingdom}(97);Firmicutes{phylum}(97);Clostridia{class}(97);Clostridiales{order}(97);Lachnospiraceae{family}(97);Clostridium_XlVa{genus}(97);Unassigned{species}(0)	Bacteria	Firmicutes	Clostridia	Clostridiales	Lachnospiraceae	Clostridium_XlVa	Unassigned
ASV793	0	0	0	0	0	0	40	0	0	0	0	0	0	0	0	0	0	0	0	0	0	0	0	0	0	0	507	0	0	0	0	0	0	0	0	0	0	0	0	0	547	Bacteria{superkingdom}(84);Firmicutes{phylum}(84);Clostridia{class}(84);Clostridiales{order}(84);Lachnospiraceae{family}(84);Anaerostipes{genus}(84);Unassigned{species}(0)	Bacteria	Firmicutes	Clostridia	Clostridiales	Lachnospiraceae	Anaerostipes	Unassigned
ASV794	0	0	0	0	0	0	0	0	0	0	0	0	0	0	0	0	0	0	0	0	0	0	0	0	0	0	92	0	0	0	0	0	0	0	0	0	0	0	0	0	92	Bacteria{superkingdom}(100);Firmicutes{phylum}(100);Clostridia{class}(100);Clostridiales{order}(100);Ruminococcaceae{family}(100);Unassigned{genus}(0);Unassigned{species}(0)	Bacteria	Firmicutes	Clostridia	Clostridiales	Ruminococcaceae	Unassigned	Unassigned
ASV795	1	0	0	23	0	0	0	0	149	0	0	0	0	0	0	0	0	0	8	0	0	71	51	0	0	0	0	0	34	0	0	0	0	0	23	0	0	0	0	0	360	Bacteria{superkingdom}(100);Proteobacteria{phylum}(100);Gammaproteobacteria{class}(100);Pasteurellales{order}(100);Pasteurellaceae{family}(100);Haemophilus{genus}(100);Unassigned{species}(0)	Bacteria	Proteobacteria	Gammaproteobacteria	Pasteurellales	Pasteurellaceae	Haemophilus	Unassigned
ASV796	0	196	0	0	0	0	0	0	0	0	0	0	0	0	0	0	0	0	0	0	386	0	0	0	0	0	0	0	0	0	0	0	0	0	0	0	0	0	0	0	582	Bacteria{superkingdom}(100);Actinobacteria{phylum}(100);Actinobacteria{class}(100);Coriobacteriales{order}(100);Coriobacteriaceae{family}(100);Collinsella{genus}(100);Unassigned{species}(0)	Bacteria	Actinobacteria	Actinobacteria	Coriobacteriales	Coriobacteriaceae	Collinsella	Unassigned
ASV798	0	0	0	0	0	0	0	0	0	0	0	0	0	0	0	0	0	0	24	0	0	0	0	0	0	0	50	0	0	0	0	0	0	0	0	0	0	0	0	0	74	Bacteria{superkingdom}(100);Firmicutes{phylum}(100);Clostridia{class}(100);Clostridiales{order}(100);Ruminococcaceae{family}(100);Unassigned{genus}(0);Unassigned{species}(0)	Bacteria	Firmicutes	Clostridia	Clostridiales	Ruminococcaceae	Unassigned	Unassigned
ASV799	0	9	0	0	0	0	0	0	0	5	0	0	0	0	0	0	0	0	0	0	20	0	0	0	0	0	0	14	0	125	0	0	0	0	0	0	0	0	30	0	203	Bacteria{superkingdom}(100);Firmicutes{phylum}(100);Clostridia{class}(100);Clostridiales{order}(100);Lachnospiraceae{family}(100);Hungatella{genus}(100);Unassigned{species}(0)	Bacteria	Firmicutes	Clostridia	Clostridiales	Lachnospiraceae	Hungatella	Unassigned
ASV800	0	0	0	0	0	0	0	0	0	0	0	0	0	0	0	0	0	0	159	0	0	0	0	0	0	0	0	0	0	0	0	0	0	0	0	0	0	0	0	0	159	Bacteria{superkingdom}(100);Firmicutes{phylum}(100);Clostridia{class}(100);Clostridiales{order}(100);Lachnospiraceae{family}(100);Unassigned{genus}(0);Unassigned{species}(0)	Bacteria	Firmicutes	Clostridia	Clostridiales	Lachnospiraceae	Unassigned	Unassigned
ASV801	0	0	158	0	0	0	0	0	0	0	0	0	0	0	0	0	0	0	0	0	0	0	20	0	0	0	0	0	0	0	0	0	0	0	0	0	0	0	0	0	178	Bacteria{superkingdom}(100);Bacteroidetes{phylum}(100);Bacteroidia{class}(100);Bacteroidales{order}(100);Prevotellaceae{family}(100);Unassigned{genus}(0);Unassigned{species}(0)	Bacteria	Bacteroidetes	Bacteroidia	Bacteroidales	Prevotellaceae	Unassigned	Unassigned
ASV803	2	0	0	14	0	0	0	0	0	0	0	0	0	0	0	0	0	18	0	0	0	0	0	12	0	0	0	12	0	0	12	0	0	0	0	0	0	0	0	0	70	Bacteria{superkingdom}(100);Firmicutes{phylum}(100);Clostridia{class}(100);Clostridiales{order}(100);Ruminococcaceae{family}(100);Oscillibacter{genus}(100);Unassigned{species}(0)	Bacteria	Firmicutes	Clostridia	Clostridiales	Ruminococcaceae	Oscillibacter	Unassigned
ASV804	14	0	0	0	0	0	0	0	0	20	11	0	0	0	0	9	32	0	31	0	0	0	0	0	0	0	0	0	0	10	0	0	0	4	0	0	0	5	0	0	136	Bacteria{superkingdom}(99);Firmicutes{phylum}(99);Clostridia{class}(99);Clostridiales{order}(99);Lachnospiraceae{family}(99);{genus}(99);uncultured_bacterium_adhufec405{species}(99)	Bacteria	Firmicutes	Clostridia	Clostridiales	Lachnospiraceae		uncultured_bacterium_adhufec405
ASV807	0	0	0	0	0	0	0	0	0	0	0	0	0	0	0	0	0	28	0	0	0	0	0	0	0	0	78	0	0	0	0	0	0	0	0	0	0	0	0	0	106	Bacteria{superkingdom}(100);Firmicutes{phylum}(100);{class}(100);{order}(100);{family}(100);{genus}(100);Unassigned{species}(0)	Bacteria	Firmicutes					Unassigned
ASV808	0	0	0	0	0	0	0	0	0	0	0	0	0	0	0	0	0	0	14	0	0	18	0	0	0	0	0	0	0	0	0	0	0	0	0	0	0	0	0	0	32	Bacteria{superkingdom}(96);Firmicutes{phylum}(96);Clostridia{class}(96);Clostridiales{order}(96);Ruminococcaceae{family}(96);{genus}(96);uncultured_bacterium_adhufec108{species}(96)	Bacteria	Firmicutes	Clostridia	Clostridiales	Ruminococcaceae		uncultured_bacterium_adhufec108
ASV809	0	0	0	0	0	0	0	0	0	0	0	61	0	0	0	0	39	0	0	0	0	0	0	0	0	0	0	0	0	0	0	38	0	44	0	101	0	0	0	0	283	Bacteria{superkingdom}(100);Firmicutes{phylum}(100);Clostridia{class}(100);Clostridiales{order}(100);Lachnospiraceae{family}(100);Coprococcus{genus}(100);Unassigned{species}(0)	Bacteria	Firmicutes	Clostridia	Clostridiales	Lachnospiraceae	Coprococcus	Unassigned
ASV810	217	0	0	0	0	0	0	0	0	0	0	0	0	0	0	0	0	0	0	0	0	19	0	0	0	0	0	0	0	0	0	0	0	0	0	0	0	10	0	0	246	Bacteria{superkingdom}(100);Firmicutes{phylum}(100);Clostridia{class}(100);Clostridiales{order}(100);Ruminococcaceae{family}(100);Faecalibacterium{genus}(100);Unassigned{species}(0)	Bacteria	Firmicutes	Clostridia	Clostridiales	Ruminococcaceae	Faecalibacterium	Unassigned
ASV811	0	0	0	0	0	0	0	0	0	0	0	0	0	0	0	0	0	0	0	0	0	0	0	0	0	0	45	0	0	0	0	0	0	0	0	0	0	0	0	0	45	Bacteria{superkingdom}(100);Firmicutes{phylum}(100);Clostridia{class}(100);Clostridiales{order}(100);Lachnospiraceae{family}(100);Unassigned{genus}(0);Unassigned{species}(0)	Bacteria	Firmicutes	Clostridia	Clostridiales	Lachnospiraceae	Unassigned	Unassigned
ASV813	0	0	0	0	0	0	0	0	0	0	0	64	0	0	0	0	0	133	0	0	0	0	0	0	0	0	0	0	0	0	0	0	0	0	0	0	0	0	0	0	197	Bacteria{superkingdom}(100);Firmicutes{phylum}(100);Clostridia{class}(100);Clostridiales{order}(100);Lachnospiraceae{family}(100);Dorea{genus}(100);Unassigned{species}(0)	Bacteria	Firmicutes	Clostridia	Clostridiales	Lachnospiraceae	Dorea	Unassigned
ASV814	0	0	0	0	0	0	0	0	0	0	0	0	0	0	0	0	237	0	0	0	0	0	0	0	0	0	0	0	0	0	0	0	0	0	0	0	0	301	0	0	538	Bacteria{superkingdom}(100);Bacteroidetes{phylum}(100);Bacteroidia{class}(100);Bacteroidales{order}(100);Prevotellaceae{family}(100);Prevotella{genus}(100);Unassigned{species}(0)	Bacteria	Bacteroidetes	Bacteroidia	Bacteroidales	Prevotellaceae	Prevotella	Unassigned
ASV815	0	0	0	0	0	0	0	0	0	0	0	0	0	0	0	0	0	13	195	0	0	0	0	0	0	0	0	12	0	0	0	0	0	0	0	0	0	0	0	0	220	Bacteria{superkingdom}(100);Firmicutes{phylum}(100);Clostridia{class}(100);Clostridiales{order}(100);Lachnospiraceae{family}(100);Clostridium_XlVb{genus}(100);Unassigned{species}(0)	Bacteria	Firmicutes	Clostridia	Clostridiales	Lachnospiraceae	Clostridium_XlVb	Unassigned
ASV816	0	143	0	0	0	3	0	31	0	0	0	0	0	81	0	0	0	0	0	0	44	0	0	0	0	14	0	69	0	0	0	0	0	0	179	0	0	0	0	0	564	Bacteria{superkingdom}(98);Firmicutes{phylum}(98);Clostridia{class}(98);Clostridiales{order}(98);Lachnospiraceae{family}(98);Clostridium_XlVa{genus}(98);Clostridium_scindens{species}(98)	Bacteria	Firmicutes	Clostridia	Clostridiales	Lachnospiraceae	Clostridium_XlVa	Clostridium_scindens
ASV817	0	0	0	0	0	0	0	0	0	0	0	0	0	0	0	0	0	0	8	0	0	0	0	0	0	0	0	0	0	0	0	0	0	0	0	0	0	0	0	0	8	Bacteria{superkingdom}(100);Firmicutes{phylum}(100);Clostridia{class}(100);Clostridiales{order}(100);Ruminococcaceae{family}(100);{genus}(100);Unassigned{species}(0)	Bacteria	Firmicutes	Clostridia	Clostridiales	Ruminococcaceae		Unassigned
ASV818	0	0	0	9	0	0	0	0	0	0	0	3	0	0	0	0	0	0	0	0	0	0	0	5	0	0	0	0	0	0	0	0	0	0	0	0	0	0	0	0	17	Bacteria{superkingdom}(100);Firmicutes{phylum}(100);Clostridia{class}(100);Clostridiales{order}(100);Lachnospiraceae{family}(100);Ruminococcus2{genus}(100);Unassigned{species}(0)	Bacteria	Firmicutes	Clostridia	Clostridiales	Lachnospiraceae	Ruminococcus2	Unassigned
ASV819	0	114	0	0	0	0	0	0	0	0	0	0	4	0	0	0	0	0	0	0	40	141	0	0	0	0	0	0	0	0	0	0	0	0	0	8	0	0	0	0	307	Bacteria{superkingdom}(100);Proteobacteria{phylum}(100);Betaproteobacteria{class}(100);Burkholderiales{order}(100);Sutterellaceae{family}(100);Parasutterella{genus}(100);Unassigned{species}(0)	Bacteria	Proteobacteria	Betaproteobacteria	Burkholderiales	Sutterellaceae	Parasutterella	Unassigned
ASV821	0	0	0	599	0	0	0	0	0	0	0	0	0	0	0	0	0	0	0	0	0	0	0	0	0	0	0	0	0	0	0	0	0	0	0	0	0	0	0	0	599	Bacteria{superkingdom}(100);Firmicutes{phylum}(100);Negativicutes{class}(100);Selenomonadales{order}(100);Veillonellaceae{family}(100);Megamonas{genus}(100);Unassigned{species}(0)	Bacteria	Firmicutes	Negativicutes	Selenomonadales	Veillonellaceae	Megamonas	Unassigned
ASV822	0	0	108	0	0	0	0	0	0	0	0	0	0	0	0	0	0	0	0	0	0	0	0	0	0	0	0	0	0	0	0	0	0	0	0	0	0	0	0	0	108	Bacteria{superkingdom}(100);Firmicutes{phylum}(100);Clostridia{class}(100);Clostridiales{order}(100);Lachnospiraceae{family}(100);Lachnospiracea_incertae_sedis{genus}(100);Unassigned{species}(0)	Bacteria	Firmicutes	Clostridia	Clostridiales	Lachnospiraceae	Lachnospiracea_incertae_sedis	Unassigned
ASV823	0	0	0	0	0	0	0	0	0	0	0	0	0	0	0	0	0	0	6	0	0	0	0	0	0	0	0	0	0	0	0	0	0	0	0	0	0	0	0	0	6	Bacteria{superkingdom}(100);Bacteroidetes{phylum}(100);Bacteroidia{class}(100);Bacteroidales{order}(100);Prevotellaceae{family}(100);Prevotella{genus}(100);Unassigned{species}(0)	Bacteria	Bacteroidetes	Bacteroidia	Bacteroidales	Prevotellaceae	Prevotella	Unassigned
ASV824	0	0	0	0	0	0	0	0	0	0	0	0	0	0	0	0	0	0	0	0	0	0	0	0	0	0	0	0	0	0	0	0	0	0	0	0	0	0	255	0	255	Bacteria{superkingdom}(99);Firmicutes{phylum}(99);Clostridia{class}(99);Clostridiales{order}(99);Ruminococcaceae{family}(99);{genus}(99);Unassigned{species}(0)	Bacteria	Firmicutes	Clostridia	Clostridiales	Ruminococcaceae		Unassigned
ASV825	0	0	0	0	0	0	0	0	0	0	0	0	0	0	0	289	0	0	0	0	0	0	0	0	0	0	0	0	0	0	0	0	0	0	0	0	328	0	0	0	617	Bacteria{superkingdom}(100);Actinobacteria{phylum}(100);Actinobacteria{class}(100);Coriobacteriales{order}(100);Coriobacteriaceae{family}(100);Collinsella{genus}(100);Unassigned{species}(0)	Bacteria	Actinobacteria	Actinobacteria	Coriobacteriales	Coriobacteriaceae	Collinsella	Unassigned
ASV827	0	0	0	0	114	0	0	0	0	0	0	35	0	0	0	0	0	0	0	0	0	0	0	0	174	0	0	0	0	0	0	58	0	0	0	0	0	0	0	0	381	Bacteria{superkingdom}(80);Firmicutes{phylum}(80);Clostridia{class}(80);Clostridiales{order}(80);Lachnospiraceae{family}(80);Lachnospiracea_incertae_sedis{genus}(80);uncultured_Eubacteriaceae_bacterium{species}(80)	Bacteria	Firmicutes	Clostridia	Clostridiales	Lachnospiraceae	Lachnospiracea_incertae_sedis	uncultured_Eubacteriaceae_bacterium
ASV829	0	0	0	0	0	0	0	0	88	0	0	0	0	0	0	0	0	0	0	0	0	0	0	0	0	0	0	0	67	0	0	0	0	0	0	0	0	0	0	0	155	Bacteria{superkingdom}(100);Firmicutes{phylum}(100);Clostridia{class}(100);Clostridiales{order}(100);Lachnospiraceae{family}(100);Dorea{genus}(100);Unassigned{species}(0)	Bacteria	Firmicutes	Clostridia	Clostridiales	Lachnospiraceae	Dorea	Unassigned
ASV830	3	42	0	0	0	0	0	0	0	0	0	0	0	0	0	0	0	0	0	0	72	0	0	0	0	0	0	0	0	0	0	0	0	0	0	0	0	0	5	10	132	Bacteria{superkingdom}(100);Firmicutes{phylum}(100);Bacilli{class}(100);Lactobacillales{order}(100);Lactobacillaceae{family}(100);Lactobacillus{genus}(100);Unassigned{species}(0)	Bacteria	Firmicutes	Bacilli	Lactobacillales	Lactobacillaceae	Lactobacillus	Unassigned
ASV831	0	0	0	0	0	0	0	0	0	0	0	0	0	0	0	0	0	0	0	0	0	0	0	0	0	0	161	0	0	0	0	0	0	0	0	0	0	0	0	0	161	Bacteria{superkingdom}(99);Bacteroidetes{phylum}(99);Bacteroidia{class}(99);Bacteroidales{order}(99);Bacteroidaceae{family}(99);Bacteroides{genus}(99);Bacteroides_eggerthii{species}(99)	Bacteria	Bacteroidetes	Bacteroidia	Bacteroidales	Bacteroidaceae	Bacteroides	Bacteroides_eggerthii
ASV832	0	0	0	0	0	0	0	0	3	23	0	0	6	0	0	0	0	5	0	0	7	0	0	5	0	0	0	0	0	14	0	0	0	0	0	0	0	0	0	0	63	Bacteria{superkingdom}(100);Firmicutes{phylum}(100);Bacilli{class}(100);Lactobacillales{order}(100);Streptococcaceae{family}(100);Streptococcus{genus}(100);Unassigned{species}(0)	Bacteria	Firmicutes	Bacilli	Lactobacillales	Streptococcaceae	Streptococcus	Unassigned
ASV833	0	0	0	0	0	0	0	0	25	0	0	42	0	6	0	0	0	66	0	0	0	0	0	11	0	0	0	0	29	0	0	15	46	0	7	0	0	0	0	0	247	Bacteria{superkingdom}(100);Actinobacteria{phylum}(100);Actinobacteria{class}(100);Coriobacteriales{order}(100);Coriobacteriaceae{family}(100);Eggerthella{genus}(100);Unassigned{species}(0)	Bacteria	Actinobacteria	Actinobacteria	Coriobacteriales	Coriobacteriaceae	Eggerthella	Unassigned
ASV834	0	0	0	0	0	0	0	0	0	0	0	0	0	0	0	0	0	0	0	0	0	0	0	0	0	31	0	0	0	0	0	0	0	0	0	0	0	0	0	0	31	Bacteria{superkingdom}(100);Firmicutes{phylum}(100);Clostridia{class}(100);Clostridiales{order}(100);Ruminococcaceae{family}(100);Ruminococcus{genus}(100);Unassigned{species}(0)	Bacteria	Firmicutes	Clostridia	Clostridiales	Ruminococcaceae	Ruminococcus	Unassigned
ASV835	0	0	0	0	0	0	22	0	0	0	0	0	0	0	0	0	9	0	0	0	0	8	0	0	0	0	18	0	0	0	6	5	6	0	0	0	10	0	0	0	84	Bacteria{superkingdom}(100);Firmicutes{phylum}(100);Clostridia{class}(100);Clostridiales{order}(100);Lachnospiraceae{family}(100);Blautia{genus}(100);Unassigned{species}(0)	Bacteria	Firmicutes	Clostridia	Clostridiales	Lachnospiraceae	Blautia	Unassigned
ASV836	208	0	0	0	0	0	0	0	0	0	0	0	0	0	0	0	0	0	0	0	0	0	0	0	0	0	0	0	0	0	8	0	0	0	0	0	0	0	0	0	216	Bacteria{superkingdom}(100);Firmicutes{phylum}(100);Clostridia{class}(100);Clostridiales{order}(100);Ruminococcaceae{family}(100);Faecalibacterium{genus}(100);Unassigned{species}(0)	Bacteria	Firmicutes	Clostridia	Clostridiales	Ruminococcaceae	Faecalibacterium	Unassigned
ASV837	0	0	0	0	0	0	0	0	0	0	0	0	39	0	0	0	12	0	0	0	0	0	11	0	0	0	0	0	0	0	0	0	0	0	0	0	0	0	0	0	62	Bacteria{superkingdom}(100);Proteobacteria{phylum}(100);Gammaproteobacteria{class}(100);Enterobacteriales{order}(100);Enterobacteriaceae{family}(100);Unassigned{genus}(0);Unassigned{species}(0)	Bacteria	Proteobacteria	Gammaproteobacteria	Enterobacteriales	Enterobacteriaceae	Unassigned	Unassigned
ASV838	0	0	0	0	0	0	0	0	0	0	0	0	0	0	0	0	0	0	0	0	0	94	0	0	0	0	0	0	0	0	0	0	0	0	0	0	0	0	0	0	94	Bacteria{superkingdom}(85);Bacteroidetes{phylum}(85);Bacteroidia{class}(85);Bacteroidales{order}(85);Prevotellaceae{family}(85);Prevotella{genus}(85);Prevotellaceae_bacterium_DJF_VR15{species}(85)	Bacteria	Bacteroidetes	Bacteroidia	Bacteroidales	Prevotellaceae	Prevotella	Prevotellaceae_bacterium_DJF_VR15
ASV839	0	0	0	0	0	0	0	0	0	0	0	0	0	0	0	0	0	17	0	0	0	0	0	0	0	0	0	0	0	0	0	0	0	0	0	27	0	0	0	0	44	Bacteria{superkingdom}(84);Firmicutes{phylum}(84);Clostridia{class}(84);Clostridiales{order}(84);Lachnospiraceae{family}(84);Howardella{genus}(84);uncultured_organism{species}(84)	Bacteria	Firmicutes	Clostridia	Clostridiales	Lachnospiraceae	Howardella	uncultured_organism
ASV840	0	0	0	0	0	0	0	0	0	0	0	0	0	0	0	0	51	0	0	0	0	0	0	0	0	0	0	0	0	0	0	0	0	0	0	0	0	0	0	0	51	Bacteria{superkingdom}(90);Proteobacteria{phylum}(90);Gammaproteobacteria{class}(90);Enterobacteriales{order}(90);Enterobacteriaceae{family}(90);Klebsiella{genus}(90);Unassigned{species}(0)	Bacteria	Proteobacteria	Gammaproteobacteria	Enterobacteriales	Enterobacteriaceae	Klebsiella	Unassigned
ASV841	0	102	0	0	0	0	0	0	0	0	0	0	0	0	0	0	0	0	0	0	47	0	0	0	0	0	0	0	0	0	0	0	0	0	0	0	0	0	0	0	149	Bacteria{superkingdom}(90);Bacteroidetes{phylum}(90);Bacteroidia{class}(90);Bacteroidales{order}(90);Bacteroidaceae{family}(90);Bacteroides{genus}(90);Bacteroides_vulgatus{species}(90)	Bacteria	Bacteroidetes	Bacteroidia	Bacteroidales	Bacteroidaceae	Bacteroides	Bacteroides_vulgatus
ASV843	0	0	0	0	0	0	0	0	0	0	0	0	0	0	0	0	55	0	0	0	0	0	0	0	0	0	0	0	0	0	0	0	0	0	0	0	0	141	0	0	196	Bacteria{superkingdom}(85);Bacteroidetes{phylum}(85);Bacteroidia{class}(85);Bacteroidales{order}(85);Porphyromonadaceae{family}(85);Barnesiella{genus}(85);uncultured_organism{species}(85)	Bacteria	Bacteroidetes	Bacteroidia	Bacteroidales	Porphyromonadaceae	Barnesiella	uncultured_organism
ASV844	0	0	0	0	0	137	0	0	0	0	0	0	0	0	0	0	0	0	0	0	0	0	0	0	0	188	0	0	0	0	0	0	0	0	0	0	0	0	0	0	325	Bacteria{superkingdom}(100);Firmicutes{phylum}(100);Clostridia{class}(100);Clostridiales{order}(100);Lachnospiraceae{family}(100);Dorea{genus}(100);Unassigned{species}(0)	Bacteria	Firmicutes	Clostridia	Clostridiales	Lachnospiraceae	Dorea	Unassigned
ASV846	0	0	0	0	0	0	0	0	0	0	0	0	0	0	0	0	0	0	6	0	0	0	0	0	0	0	0	0	0	0	0	0	0	0	0	0	0	0	0	0	6	Bacteria{superkingdom}(99);Firmicutes{phylum}(99);Clostridia{class}(99);Clostridiales{order}(99);Ruminococcaceae{family}(99);{genus}(99);Unassigned{species}(0)	Bacteria	Firmicutes	Clostridia	Clostridiales	Ruminococcaceae		Unassigned
ASV849	0	0	0	0	0	0	0	0	0	0	0	0	0	0	0	0	0	0	0	0	0	0	0	0	0	0	0	0	0	0	68	0	0	0	0	0	0	0	0	0	68	Bacteria{superkingdom}(100);Firmicutes{phylum}(100);Clostridia{class}(100);Clostridiales{order}(100);Ruminococcaceae{family}(100);Faecalibacterium{genus}(100);Unassigned{species}(0)	Bacteria	Firmicutes	Clostridia	Clostridiales	Ruminococcaceae	Faecalibacterium	Unassigned
ASV850	0	0	0	0	0	0	0	0	0	10	0	0	0	0	0	0	0	0	0	0	0	0	0	0	0	0	0	0	0	106	0	0	0	0	0	0	0	0	0	0	116	Bacteria{superkingdom}(100);Firmicutes{phylum}(100);Negativicutes{class}(100);Selenomonadales{order}(100);Veillonellaceae{family}(100);Allisonella{genus}(100);Unassigned{species}(0)	Bacteria	Firmicutes	Negativicutes	Selenomonadales	Veillonellaceae	Allisonella	Unassigned
ASV851	0	0	0	0	0	0	0	0	0	0	0	0	0	0	0	0	0	0	0	0	0	0	0	0	0	0	0	0	0	0	0	0	113	0	0	0	0	0	0	0	113	Bacteria{superkingdom}(100);Proteobacteria{phylum}(100);Deltaproteobacteria{class}(100);Bdellovibrionales{order}(100);Bdellovibrionaceae{family}(100);Vampirovibrio{genus}(100);Unassigned{species}(0)	Bacteria	Proteobacteria	Deltaproteobacteria	Bdellovibrionales	Bdellovibrionaceae	Vampirovibrio	Unassigned
ASV852	0	0	0	0	0	0	0	0	0	0	0	0	0	0	0	0	95	0	4	0	0	0	0	0	0	0	0	0	0	0	0	3	0	0	0	0	0	126	0	0	228	Bacteria{superkingdom}(100);Firmicutes{phylum}(100);{class}(100);{order}(100);{family}(100);{genus}(100);Unassigned{species}(0)	Bacteria	Firmicutes					Unassigned
ASV854	0	0	0	0	0	0	0	0	0	0	0	0	0	525	0	26	0	0	0	0	0	7	0	0	0	0	0	0	0	0	0	0	0	0	0	0	0	0	0	0	558	Bacteria{superkingdom}(99);Firmicutes{phylum}(99);Bacilli{class}(99);Lactobacillales{order}(99);Enterococcaceae{family}(99);Enterococcus{genus}(99);Unassigned{species}(0)	Bacteria	Firmicutes	Bacilli	Lactobacillales	Enterococcaceae	Enterococcus	Unassigned
ASV855	0	0	0	0	0	0	0	0	0	0	0	0	0	0	0	0	0	0	0	0	0	0	0	0	0	0	0	368	0	0	0	0	0	0	0	0	0	0	0	0	368	Bacteria{superkingdom}(100);Bacteroidetes{phylum}(100);Bacteroidia{class}(100);Bacteroidales{order}(100);Bacteroidaceae{family}(100);Bacteroides{genus}(100);Unassigned{species}(0)	Bacteria	Bacteroidetes	Bacteroidia	Bacteroidales	Bacteroidaceae	Bacteroides	Unassigned
ASV856	0	0	0	0	0	0	0	0	0	0	0	0	0	0	0	0	0	11	0	0	0	0	0	0	0	0	0	0	0	0	0	0	0	0	0	0	32	82	0	0	125	Bacteria{superkingdom}(83);Bacteroidetes{phylum}(83);Bacteroidia{class}(83);Bacteroidales{order}(83);Bacteroidaceae{family}(83);Bacteroides{genus}(83);Bacteroides_eggerthii{species}(83)	Bacteria	Bacteroidetes	Bacteroidia	Bacteroidales	Bacteroidaceae	Bacteroides	Bacteroides_eggerthii
ASV857	0	0	0	0	0	0	0	0	0	0	0	0	0	0	0	0	0	0	0	0	0	0	0	0	0	0	0	0	0	0	0	0	0	76	0	0	0	0	0	0	76	Bacteria{superkingdom}(100);Firmicutes{phylum}(100);Bacilli{class}(100);Lactobacillales{order}(100);Lactobacillaceae{family}(100);Lactobacillus{genus}(100);Unassigned{species}(0)	Bacteria	Firmicutes	Bacilli	Lactobacillales	Lactobacillaceae	Lactobacillus	Unassigned
ASV858	0	0	0	0	0	0	0	0	0	0	0	0	0	0	0	0	0	0	0	0	0	188	0	0	0	0	0	0	0	0	0	0	0	0	0	0	0	0	0	0	188	Bacteria{superkingdom}(100);Proteobacteria{phylum}(100);Gammaproteobacteria{class}(100);Pasteurellales{order}(100);Pasteurellaceae{family}(100);Haemophilus{genus}(100);Unassigned{species}(0)	Bacteria	Proteobacteria	Gammaproteobacteria	Pasteurellales	Pasteurellaceae	Haemophilus	Unassigned
ASV859	0	0	0	0	0	0	0	0	0	0	0	0	0	0	0	0	105	0	0	0	0	0	0	0	0	0	0	0	0	0	0	0	0	0	0	0	0	136	0	0	241	Bacteria{superkingdom}(100);Bacteroidetes{phylum}(100);Bacteroidia{class}(100);Bacteroidales{order}(100);Bacteroidaceae{family}(100);Bacteroides{genus}(100);Unassigned{species}(0)	Bacteria	Bacteroidetes	Bacteroidia	Bacteroidales	Bacteroidaceae	Bacteroides	Unassigned
ASV863	51	0	0	0	0	0	0	0	0	0	0	113	0	0	0	0	0	0	0	0	0	0	0	0	0	0	0	0	0	0	0	84	0	0	0	0	0	0	0	0	248	Bacteria{superkingdom}(90);Firmicutes{phylum}(90);Clostridia{class}(90);Clostridiales{order}(90);Ruminococcaceae{family}(90);Gemmiger{genus}(90);Unassigned{species}(0)	Bacteria	Firmicutes	Clostridia	Clostridiales	Ruminococcaceae	Gemmiger	Unassigned
ASV864	25	0	0	12	0	0	0	0	0	0	0	0	0	0	0	0	0	0	0	0	0	0	0	61	0	0	0	0	0	0	0	0	0	0	0	0	0	0	0	0	98	Bacteria{superkingdom}(100);Firmicutes{phylum}(100);Clostridia{class}(100);Clostridiales{order}(100);Ruminococcaceae{family}(100);Ruminococcus{genus}(100);Ruminococcus_callidus{species}(100)	Bacteria	Firmicutes	Clostridia	Clostridiales	Ruminococcaceae	Ruminococcus	Ruminococcus_callidus
ASV865	0	0	0	0	0	0	0	0	0	0	0	25	0	0	0	0	0	0	0	0	0	0	0	0	0	0	0	0	0	0	0	27	0	0	0	0	0	63	0	0	115	Bacteria{superkingdom}(91);Bacteroidetes{phylum}(91);Bacteroidia{class}(91);Bacteroidales{order}(91);Porphyromonadaceae{family}(91);Parabacteroides{genus}(91);Parabacteroides_distasonis{species}(91)	Bacteria	Bacteroidetes	Bacteroidia	Bacteroidales	Porphyromonadaceae	Parabacteroides	Parabacteroides_distasonis
ASV866	0	0	0	0	0	0	0	0	0	0	0	39	0	0	0	0	0	0	43	0	0	0	0	0	0	92	0	0	0	0	0	22	0	0	0	0	0	0	0	0	196	Bacteria{superkingdom}(100);Firmicutes{phylum}(100);Clostridia{class}(100);Clostridiales{order}(100);Lachnospiraceae{family}(100);Roseburia{genus}(100);Unassigned{species}(0)	Bacteria	Firmicutes	Clostridia	Clostridiales	Lachnospiraceae	Roseburia	Unassigned
ASV867	0	0	0	0	0	0	0	6	0	20	0	0	0	71	0	0	0	0	0	0	0	16	0	0	0	0	0	100	0	32	0	0	0	0	96	0	0	0	0	0	341	Bacteria{superkingdom}(95);Firmicutes{phylum}(95);Clostridia{class}(95);Clostridiales{order}(95);Ruminococcaceae{family}(95);Intestinimonas{genus}(95);uncultured_rumen_bacterium{species}(95)	Bacteria	Firmicutes	Clostridia	Clostridiales	Ruminococcaceae	Intestinimonas	uncultured_rumen_bacterium
ASV871	0	13	0	20	0	0	0	11	0	0	0	0	0	0	20	24	12	0	0	0	0	0	0	0	0	0	0	0	0	0	0	4	0	0	0	0	0	0	0	0	104	Bacteria{superkingdom}(100);Actinobacteria{phylum}(100);Actinobacteria{class}(100);Actinomycetales{order}(100);Actinomycetaceae{family}(100);Actinomyces{genus}(100);Unassigned{species}(0)	Bacteria	Actinobacteria	Actinobacteria	Actinomycetales	Actinomycetaceae	Actinomyces	Unassigned
ASV874	0	0	0	0	0	0	17	0	1	0	0	82	0	0	0	0	0	0	0	0	0	0	4	0	0	0	8	0	0	0	0	41	0	0	0	0	0	0	0	0	153	Bacteria{superkingdom}(100);Firmicutes{phylum}(100);Clostridia{class}(100);Clostridiales{order}(100);Ruminococcaceae{family}(100);Ruminococcus{genus}(100);Unassigned{species}(0)	Bacteria	Firmicutes	Clostridia	Clostridiales	Ruminococcaceae	Ruminococcus	Unassigned
ASV875	0	0	0	0	0	0	7	0	0	0	0	0	0	0	0	0	0	0	0	0	0	0	0	0	0	0	67	0	0	0	0	0	0	0	0	0	0	0	0	0	74	Bacteria{superkingdom}(98);Proteobacteria{phylum}(98);Deltaproteobacteria{class}(98);Desulfovibrionales{order}(98);Desulfovibrionaceae{family}(98);Desulfovibrio{genus}(98);Unassigned{species}(0)	Bacteria	Proteobacteria	Deltaproteobacteria	Desulfovibrionales	Desulfovibrionaceae	Desulfovibrio	Unassigned
ASV878	0	0	0	0	0	0	0	0	0	0	0	0	0	0	0	0	0	0	25	0	0	0	0	0	0	0	0	0	0	0	0	0	0	0	0	0	0	20	0	0	45	Bacteria{superkingdom}(100);Bacteroidetes{phylum}(100);Bacteroidia{class}(100);Bacteroidales{order}(100);Bacteroidaceae{family}(100);Bacteroides{genus}(100);Unassigned{species}(0)	Bacteria	Bacteroidetes	Bacteroidia	Bacteroidales	Bacteroidaceae	Bacteroides	Unassigned
ASV879	0	0	0	0	0	0	0	0	0	0	0	0	0	0	0	0	0	0	70	0	0	0	0	0	0	0	0	0	0	0	0	0	0	0	0	0	0	0	0	0	70	Bacteria{superkingdom}(94);Firmicutes{phylum}(94);Clostridia{class}(94);Clostridiales{order}(94);Ruminococcaceae{family}(94);Oscillibacter{genus}(94);uncultured_Bacteroidetes_bacterium{species}(94)	Bacteria	Firmicutes	Clostridia	Clostridiales	Ruminococcaceae	Oscillibacter	uncultured_Bacteroidetes_bacterium
ASV881	0	0	0	0	0	0	0	0	0	0	0	0	0	0	0	0	0	0	0	0	0	0	0	0	0	0	0	0	0	0	0	0	0	0	0	0	0	0	0	29	29	Bacteria{superkingdom}(86);Firmicutes{phylum}(86);Clostridia{class}(86);Clostridiales{order}(86);Lachnospiraceae{family}(86);Ruminococcus2{genus}(86);uncultured_organism{species}(86)	Bacteria	Firmicutes	Clostridia	Clostridiales	Lachnospiraceae	Ruminococcus2	uncultured_organism
ASV883	0	0	0	0	0	0	0	0	0	0	0	0	0	0	0	0	0	0	0	0	0	0	0	0	0	0	0	0	0	0	0	0	184	0	0	0	0	0	0	0	184	Bacteria{superkingdom}(96);{phylum}(96);{class}(96);{order}(96);{family}(96);{genus}(96);uncultured_Tenericutes_bacterium{species}(96)	Bacteria						uncultured_Tenericutes_bacterium
ASV887	0	0	0	0	0	0	0	0	0	0	0	0	0	0	0	0	0	0	35	0	0	0	0	0	9	0	0	0	0	0	12	0	42	0	0	0	0	25	0	0	123	Bacteria{superkingdom}(100);Bacteroidetes{phylum}(100);Bacteroidia{class}(100);Bacteroidales{order}(100);Rikenellaceae{family}(100);Alistipes{genus}(100);Unassigned{species}(0)	Bacteria	Bacteroidetes	Bacteroidia	Bacteroidales	Rikenellaceae	Alistipes	Unassigned
ASV888	0	0	0	0	0	0	0	0	0	0	0	0	0	0	0	0	32	0	0	19	0	0	0	0	0	0	0	0	0	0	0	0	0	0	0	0	0	0	0	0	51	Bacteria{superkingdom}(100);Proteobacteria{phylum}(100);Gammaproteobacteria{class}(100);Pasteurellales{order}(100);Pasteurellaceae{family}(100);Haemophilus{genus}(100);Unassigned{species}(0)	Bacteria	Proteobacteria	Gammaproteobacteria	Pasteurellales	Pasteurellaceae	Haemophilus	Unassigned
ASV889	0	0	0	0	0	0	0	0	0	0	0	0	0	0	0	0	0	0	0	0	0	0	0	0	8	0	0	0	0	0	0	0	0	0	0	0	0	0	0	0	8	Bacteria{superkingdom}(82);Firmicutes{phylum}(82);Clostridia{class}(82);Clostridiales{order}(82);Ruminococcaceae{family}(82);Papillibacter{genus}(82);uncultured_bacterium{species}(82)	Bacteria	Firmicutes	Clostridia	Clostridiales	Ruminococcaceae	Papillibacter	uncultured_bacterium
ASV896	0	0	0	0	0	0	83	0	0	0	0	0	0	0	0	0	0	0	0	0	0	0	0	0	0	0	87	0	0	0	0	0	0	27	0	0	0	0	0	0	197	Bacteria{superkingdom}(100);Firmicutes{phylum}(100);Clostridia{class}(100);Clostridiales{order}(100);Ruminococcaceae{family}(100);Clostridium_IV{genus}(100);Unassigned{species}(0)	Bacteria	Firmicutes	Clostridia	Clostridiales	Ruminococcaceae	Clostridium_IV	Unassigned
ASV899	0	0	0	0	0	0	0	0	0	0	0	0	0	0	0	0	0	0	0	0	0	0	0	0	0	0	0	0	0	0	82	0	0	0	0	0	0	0	0	0	82	Bacteria{superkingdom}(98);Firmicutes{phylum}(98);Clostridia{class}(98);Clostridiales{order}(98);Ruminococcaceae{family}(98);Anaerobacterium{genus}(98);Unassigned{species}(0)	Bacteria	Firmicutes	Clostridia	Clostridiales	Ruminococcaceae	Anaerobacterium	Unassigned
ASV900	0	0	0	0	0	0	0	0	0	0	0	0	0	0	0	0	0	0	17	0	0	0	0	0	0	0	0	0	0	0	0	0	0	0	0	0	0	0	0	0	17	Bacteria{superkingdom}(99);Firmicutes{phylum}(99);Clostridia{class}(99);Clostridiales{order}(99);Ruminococcaceae{family}(99);{genus}(99);Unassigned{species}(0)	Bacteria	Firmicutes	Clostridia	Clostridiales	Ruminococcaceae		Unassigned
ASV902	0	0	0	0	0	0	0	0	20	0	0	0	0	0	0	0	0	0	0	0	0	0	0	0	0	0	0	0	0	0	0	0	0	0	0	0	0	0	0	0	20	Bacteria{superkingdom}(96);Firmicutes{phylum}(96);Clostridia{class}(96);Clostridiales{order}(96);Clostridiaceae_1{family}(96);Clostridium_sensu_stricto{genus}(96);uncultured_Sarcina_sp.{species}(96)	Bacteria	Firmicutes	Clostridia	Clostridiales	Clostridiaceae_1	Clostridium_sensu_stricto	uncultured_Sarcina_sp.
ASV904	0	0	69	0	0	0	0	0	0	0	0	0	0	0	0	0	0	0	0	0	0	0	0	0	0	0	0	0	0	0	0	0	0	0	0	0	0	0	0	0	69	Bacteria{superkingdom}(100);Proteobacteria{phylum}(100);Gammaproteobacteria{class}(100);Enterobacteriales{order}(100);Enterobacteriaceae{family}(100);Escherichia/Shigella{genus}(100);Unassigned{species}(0)	Bacteria	Proteobacteria	Gammaproteobacteria	Enterobacteriales	Enterobacteriaceae	Escherichia/Shigella	Unassigned
ASV905	0	0	0	0	0	0	0	0	0	0	0	0	0	0	0	0	0	0	11	0	0	33	0	0	0	0	0	0	0	0	0	0	0	0	0	0	0	0	0	0	44	Bacteria{superkingdom}(100);Firmicutes{phylum}(100);Clostridia{class}(100);Clostridiales{order}(100);Ruminococcaceae{family}(100);Anaerobacterium{genus}(100);Unassigned{species}(0)	Bacteria	Firmicutes	Clostridia	Clostridiales	Ruminococcaceae	Anaerobacterium	Unassigned
ASV906	0	15	0	0	0	0	0	15	0	0	0	0	14	22	0	0	0	0	0	0	23	0	0	0	0	0	0	20	0	0	0	0	0	0	96	0	0	0	0	0	205	Bacteria{superkingdom}(100);Firmicutes{phylum}(100);Clostridia{class}(100);Clostridiales{order}(100);Lachnospiraceae{family}(100);Unassigned{genus}(0);Unassigned{species}(0)	Bacteria	Firmicutes	Clostridia	Clostridiales	Lachnospiraceae	Unassigned	Unassigned
ASV907	34	0	0	0	0	0	0	0	0	0	0	0	0	0	16	0	0	0	0	0	0	0	0	0	0	0	0	0	0	0	0	0	0	0	0	0	0	0	0	0	50	Bacteria{superkingdom}(100);Firmicutes{phylum}(100);Clostridia{class}(100);Clostridiales{order}(100);Ruminococcaceae{family}(100);Faecalibacterium{genus}(100);Unassigned{species}(0)	Bacteria	Firmicutes	Clostridia	Clostridiales	Ruminococcaceae	Faecalibacterium	Unassigned
ASV908	0	0	0	0	0	26	0	0	0	0	0	0	0	18	0	0	0	0	0	0	0	0	0	0	0	53	0	0	0	0	0	0	0	0	50	0	15	0	0	0	162	Bacteria{superkingdom}(100);Firmicutes{phylum}(100);Clostridia{class}(100);Clostridiales{order}(100);Lachnospiraceae{family}(100);Unassigned{genus}(0);Unassigned{species}(0)	Bacteria	Firmicutes	Clostridia	Clostridiales	Lachnospiraceae	Unassigned	Unassigned
ASV909	0	0	0	0	0	0	0	0	0	0	0	0	0	0	0	0	0	0	0	432	0	0	0	0	0	0	0	0	0	0	0	0	0	0	0	0	0	0	0	62	494	Bacteria{superkingdom}(83);Bacteroidetes{phylum}(83);Bacteroidia{class}(83);Bacteroidales{order}(83);Bacteroidaceae{family}(83);Bacteroides{genus}(83);Bacteroides_vulgatus{species}(83)	Bacteria	Bacteroidetes	Bacteroidia	Bacteroidales	Bacteroidaceae	Bacteroides	Bacteroides_vulgatus
ASV910	0	0	0	6	0	0	0	0	0	1	0	0	0	0	0	0	2	0	0	0	3	0	0	1	0	0	0	0	0	0	0	0	0	1	0	0	0	0	0	0	14	Bacteria{superkingdom}(100);Bacteroidetes{phylum}(100);Bacteroidia{class}(100);Bacteroidales{order}(100);Bacteroidaceae{family}(100);Bacteroides{genus}(100);Unassigned{species}(0)	Bacteria	Bacteroidetes	Bacteroidia	Bacteroidales	Bacteroidaceae	Bacteroides	Unassigned
ASV912	0	0	0	0	0	0	0	0	0	0	0	0	0	0	0	0	0	0	0	0	0	0	0	0	0	0	0	0	0	0	0	0	0	0	0	0	54	0	0	0	54	Bacteria{superkingdom}(84);Bacteroidetes{phylum}(84);Bacteroidia{class}(84);Bacteroidales{order}(84);Bacteroidaceae{family}(84);Bacteroides{genus}(84);Bacteroides_faecis{species}(84)	Bacteria	Bacteroidetes	Bacteroidia	Bacteroidales	Bacteroidaceae	Bacteroides	Bacteroides_faecis
ASV913	0	0	0	0	0	0	0	0	0	0	0	0	0	0	0	0	0	0	0	0	0	53	0	0	0	0	0	0	0	0	0	0	0	0	0	0	0	0	0	0	53	Bacteria{superkingdom}(96);Firmicutes{phylum}(96);Clostridia{class}(96);Clostridiales{order}(96);Ruminococcaceae{family}(96);Anaerobacterium{genus}(96);uncultured_bacterium{species}(96)	Bacteria	Firmicutes	Clostridia	Clostridiales	Ruminococcaceae	Anaerobacterium	uncultured_bacterium
ASV915	0	0	0	0	0	0	0	0	0	0	0	0	0	0	0	0	0	0	0	0	0	0	0	30	0	0	0	0	0	0	0	0	0	0	0	0	0	0	0	0	30	Bacteria{superkingdom}(100);Bacteroidetes{phylum}(100);Bacteroidia{class}(100);Bacteroidales{order}(100);Bacteroidaceae{family}(100);Bacteroides{genus}(100);Unassigned{species}(0)	Bacteria	Bacteroidetes	Bacteroidia	Bacteroidales	Bacteroidaceae	Bacteroides	Unassigned
ASV916	0	0	0	0	0	59	0	0	0	0	0	0	0	0	0	0	0	0	0	0	0	0	0	0	0	89	0	0	0	0	0	0	0	33	0	0	0	0	0	0	181	Bacteria{superkingdom}(100);Bacteroidetes{phylum}(100);Bacteroidia{class}(100);Bacteroidales{order}(100);Bacteroidaceae{family}(100);Bacteroides{genus}(100);Bacteroides_caccae{species}(100)	Bacteria	Bacteroidetes	Bacteroidia	Bacteroidales	Bacteroidaceae	Bacteroides	Bacteroides_caccae
ASV919	0	0	0	0	0	0	0	0	0	0	0	0	0	0	0	0	0	0	11	0	0	0	0	0	0	0	0	0	0	0	0	0	0	0	0	0	0	0	0	0	11	Bacteria{superkingdom}(99);Firmicutes{phylum}(99);Clostridia{class}(99);Clostridiales{order}(99);Lachnospiraceae{family}(99);Roseburia{genus}(99);Unassigned{species}(0)	Bacteria	Firmicutes	Clostridia	Clostridiales	Lachnospiraceae	Roseburia	Unassigned
ASV920	30	0	0	0	0	0	0	0	0	0	0	0	0	0	0	0	0	0	0	0	0	14	0	0	0	0	0	0	0	0	0	0	0	0	0	0	0	0	0	0	44	Bacteria{superkingdom}(100);Firmicutes{phylum}(100);Clostridia{class}(100);Clostridiales{order}(100);Lachnospiraceae{family}(100);Unassigned{genus}(0);Unassigned{species}(0)	Bacteria	Firmicutes	Clostridia	Clostridiales	Lachnospiraceae	Unassigned	Unassigned
ASV921	0	0	0	0	0	0	0	0	0	0	0	0	0	0	0	0	0	0	0	0	0	4	0	0	0	0	1	0	18	0	0	0	1	0	0	0	0	0	0	0	24	Bacteria{superkingdom}(100);Bacteroidetes{phylum}(100);Bacteroidia{class}(100);Bacteroidales{order}(100);Bacteroidaceae{family}(100);Bacteroides{genus}(100);Unassigned{species}(0)	Bacteria	Bacteroidetes	Bacteroidia	Bacteroidales	Bacteroidaceae	Bacteroides	Unassigned
ASV923	0	0	0	0	0	0	0	0	0	0	0	0	0	0	0	0	0	0	0	0	0	0	0	0	0	0	462	0	0	0	0	0	0	0	0	0	0	0	0	0	462	Bacteria{superkingdom}(100);Firmicutes{phylum}(100);{class}(100);{order}(100);{family}(100);{genus}(100);Unassigned{species}(0)	Bacteria	Firmicutes					Unassigned
ASV928	0	0	0	0	0	0	17	0	0	0	0	1	0	0	0	0	0	0	18	0	0	12	0	0	0	0	31	0	0	0	0	9	0	0	0	31	0	0	0	0	119	Bacteria{superkingdom}(100);Firmicutes{phylum}(100);Clostridia{class}(100);Clostridiales{order}(100);Catabacteriaceae{family}(100);Catabacter{genus}(100);uncultured_rumen_bacterium{species}(100)	Bacteria	Firmicutes	Clostridia	Clostridiales	Catabacteriaceae	Catabacter	uncultured_rumen_bacterium
ASV929	0	0	43	0	0	0	0	95	0	0	0	0	0	0	0	0	0	0	0	0	0	0	0	0	0	0	0	6	0	0	0	0	0	0	0	0	0	0	0	0	144	Bacteria{superkingdom}(98);Proteobacteria{phylum}(98);Gammaproteobacteria{class}(98);Enterobacteriales{order}(98);Enterobacteriaceae{family}(98);Klebsiella{genus}(98);Unassigned{species}(0)	Bacteria	Proteobacteria	Gammaproteobacteria	Enterobacteriales	Enterobacteriaceae	Klebsiella	Unassigned
ASV931	0	0	0	0	0	0	0	0	0	0	0	0	0	0	0	0	347	0	0	0	0	0	0	0	0	0	0	0	0	0	0	0	0	0	0	0	0	252	0	0	599	Bacteria{superkingdom}(100);Firmicutes{phylum}(100);Erysipelotrichia{class}(100);Erysipelotrichales{order}(100);Erysipelotrichaceae{family}(100);Holdemanella{genus}(100);Unassigned{species}(0)	Bacteria	Firmicutes	Erysipelotrichia	Erysipelotrichales	Erysipelotrichaceae	Holdemanella	Unassigned
ASV934	0	0	0	0	0	0	0	0	0	0	0	0	0	0	0	0	160	0	0	0	0	0	0	0	0	0	0	0	0	0	0	0	0	0	0	0	0	184	0	0	344	Bacteria{superkingdom}(92);Proteobacteria{phylum}(92);Deltaproteobacteria{class}(92);Bdellovibrionales{order}(92);Bdellovibrionaceae{family}(92);Vampirovibrio{genus}(92);uncultured_bacterium{species}(92)	Bacteria	Proteobacteria	Deltaproteobacteria	Bdellovibrionales	Bdellovibrionaceae	Vampirovibrio	uncultured_bacterium
ASV935	0	0	0	0	0	0	0	0	0	0	0	305	0	0	0	0	0	0	0	0	0	0	0	0	0	0	0	0	0	0	0	241	0	0	0	0	0	0	0	0	546	Bacteria{superkingdom}(100);Firmicutes{phylum}(100);Clostridia{class}(100);Clostridiales{order}(100);Ruminococcaceae{family}(100);Faecalibacterium{genus}(100);Unassigned{species}(0)	Bacteria	Firmicutes	Clostridia	Clostridiales	Ruminococcaceae	Faecalibacterium	Unassigned
ASV938	0	0	0	0	0	31	0	0	0	0	0	0	0	52	0	0	0	77	0	0	0	0	0	0	0	22	0	0	0	0	0	11	53	0	12	0	0	0	0	0	258	Bacteria{superkingdom}(100);Firmicutes{phylum}(100);Clostridia{class}(100);Clostridiales{order}(100);Clostridiales_Incertae_Sedis_XIII{family}(100);Anaerovorax{genus}(100);Unassigned{species}(0)	Bacteria	Firmicutes	Clostridia	Clostridiales	Clostridiales_Incertae_Sedis_XIII	Anaerovorax	Unassigned
ASV939	0	2	0	0	3	0	0	66	5	0	0	0	0	205	0	0	0	3	0	0	0	0	0	3	0	0	0	0	0	0	0	2	0	0	0	0	0	0	0	0	289	Bacteria{superkingdom}(100);Firmicutes{phylum}(100);Bacilli{class}(100);Lactobacillales{order}(100);Leuconostocaceae{family}(100);Leuconostoc{genus}(100);Unassigned{species}(0)	Bacteria	Firmicutes	Bacilli	Lactobacillales	Leuconostocaceae	Leuconostoc	Unassigned
ASV940	3	0	0	0	0	17	19	6	0	4	9	7	0	4	0	0	6	5	0	7	0	0	0	11	0	0	0	3	0	0	3	6	24	0	7	3	3	7	7	0	161	Bacteria{superkingdom}(100);Firmicutes{phylum}(100);Clostridia{class}(100);Clostridiales{order}(100);Lachnospiraceae{family}(100);Unassigned{genus}(0);Unassigned{species}(0)	Bacteria	Firmicutes	Clostridia	Clostridiales	Lachnospiraceae	Unassigned	Unassigned
ASV942	0	0	0	0	0	0	0	0	0	0	0	0	0	0	0	0	0	0	0	0	0	248	0	0	0	0	0	0	0	0	0	0	0	0	0	0	0	0	0	0	248	Bacteria{superkingdom}(100);Bacteroidetes{phylum}(100);Bacteroidia{class}(100);Bacteroidales{order}(100);Porphyromonadaceae{family}(100);{genus}(100);Unassigned{species}(0)	Bacteria	Bacteroidetes	Bacteroidia	Bacteroidales	Porphyromonadaceae		Unassigned
ASV943	0	0	0	0	0	0	0	0	0	0	390	0	0	0	0	0	0	0	0	0	0	0	0	0	0	0	0	0	0	0	0	0	0	0	0	0	0	0	0	0	390	Bacteria{superkingdom}(100);Firmicutes{phylum}(100);Negativicutes{class}(100);Selenomonadales{order}(100);Veillonellaceae{family}(100);Megasphaera{genus}(100);Unassigned{species}(0)	Bacteria	Firmicutes	Negativicutes	Selenomonadales	Veillonellaceae	Megasphaera	Unassigned
ASV944	7	0	0	11	0	0	33	0	0	0	0	5	0	0	0	0	11	0	0	0	0	0	0	0	0	11	16	0	0	0	0	0	11	0	8	0	0	0	0	0	113	Bacteria{superkingdom}(100);Firmicutes{phylum}(100);Clostridia{class}(100);Clostridiales{order}(100);Lachnospiraceae{family}(100);Blautia{genus}(100);Unassigned{species}(0)	Bacteria	Firmicutes	Clostridia	Clostridiales	Lachnospiraceae	Blautia	Unassigned
ASV947	3	0	0	1	2	0	0	0	0	0	0	0	0	0	0	0	0	0	0	0	0	0	0	3	0	1	0	0	0	0	0	0	0	0	0	0	0	0	0	0	10	Bacteria{superkingdom}(100);Bacteroidetes{phylum}(100);Bacteroidia{class}(100);Bacteroidales{order}(100);Bacteroidaceae{family}(100);Bacteroides{genus}(100);Unassigned{species}(0)	Bacteria	Bacteroidetes	Bacteroidia	Bacteroidales	Bacteroidaceae	Bacteroides	Unassigned
ASV950	0	0	0	0	46	0	0	0	0	0	42	0	0	0	0	0	0	0	0	0	0	0	0	0	0	0	0	0	0	0	0	0	0	0	39	0	0	0	0	0	127	Bacteria{superkingdom}(100);Proteobacteria{phylum}(100);Gammaproteobacteria{class}(100);Enterobacteriales{order}(100);Enterobacteriaceae{family}(100);Unassigned{genus}(0);Unassigned{species}(0)	Bacteria	Proteobacteria	Gammaproteobacteria	Enterobacteriales	Enterobacteriaceae	Unassigned	Unassigned
ASV951	0	0	0	0	0	39	0	0	0	0	0	0	0	0	0	0	0	0	0	0	0	0	0	0	0	30	0	0	0	0	0	0	0	0	0	0	0	0	0	0	69	Bacteria{superkingdom}(100);Bacteroidetes{phylum}(100);Bacteroidia{class}(100);Bacteroidales{order}(100);Rikenellaceae{family}(100);Alistipes{genus}(100);Unassigned{species}(0)	Bacteria	Bacteroidetes	Bacteroidia	Bacteroidales	Rikenellaceae	Alistipes	Unassigned
ASV952	0	0	0	0	0	0	0	0	0	0	0	0	0	0	0	0	0	0	0	0	0	31	0	0	0	0	0	0	0	0	0	0	33	0	0	51	0	0	0	0	115	Bacteria{superkingdom}(91);Firmicutes{phylum}(91);Clostridia{class}(91);Clostridiales{order}(91);Ruminococcaceae{family}(91);{genus}(91);Unassigned{species}(0)	Bacteria	Firmicutes	Clostridia	Clostridiales	Ruminococcaceae		Unassigned
ASV954	0	0	0	0	0	59	0	0	0	0	0	0	0	0	0	0	0	0	39	0	0	41	0	0	0	43	13	0	0	0	0	0	0	0	0	0	0	0	0	0	195	Bacteria{superkingdom}(100);Firmicutes{phylum}(100);Clostridia{class}(100);Clostridiales{order}(100);Ruminococcaceae{family}(100);Faecalibacterium{genus}(100);Unassigned{species}(0)	Bacteria	Firmicutes	Clostridia	Clostridiales	Ruminococcaceae	Faecalibacterium	Unassigned
ASV955	0	0	0	0	0	0	258	0	0	0	0	0	0	0	0	0	0	0	0	0	0	0	0	0	0	0	245	0	0	0	0	0	0	0	0	0	0	0	0	0	503	Bacteria{superkingdom}(100);Firmicutes{phylum}(100);Erysipelotrichia{class}(100);Erysipelotrichales{order}(100);Erysipelotrichaceae{family}(100);Clostridium_XVIII{genus}(100);Unassigned{species}(0)	Bacteria	Firmicutes	Erysipelotrichia	Erysipelotrichales	Erysipelotrichaceae	Clostridium_XVIII	Unassigned
ASV957	0	0	0	0	0	0	0	0	0	0	0	0	0	57	0	0	0	0	77	0	0	0	0	0	0	0	0	0	0	87	0	0	0	0	0	0	0	0	0	0	221	Bacteria{superkingdom}(89);Bacteroidetes{phylum}(89);Bacteroidia{class}(89);Bacteroidales{order}(89);Porphyromonadaceae{family}(89);Parabacteroides{genus}(89);Parabacteroides_distasonis{species}(89)	Bacteria	Bacteroidetes	Bacteroidia	Bacteroidales	Porphyromonadaceae	Parabacteroides	Parabacteroides_distasonis
ASV959	0	0	0	0	0	0	0	0	0	0	0	0	0	0	0	0	0	0	0	0	0	0	0	0	0	0	0	0	0	0	0	0	0	77	0	0	0	0	0	0	77	Bacteria{superkingdom}(85);Firmicutes{phylum}(85);Bacilli{class}(85);Lactobacillales{order}(85);Lactobacillaceae{family}(85);Lactobacillus{genus}(85);Lactobacillus_ruminis{species}(85)	Bacteria	Firmicutes	Bacilli	Lactobacillales	Lactobacillaceae	Lactobacillus	Lactobacillus_ruminis
ASV960	0	0	0	0	0	0	0	478	0	0	0	0	0	0	0	0	34	0	0	0	0	0	0	0	0	0	0	0	0	0	0	0	0	0	0	0	0	0	0	0	512	Bacteria{superkingdom}(94);Proteobacteria{phylum}(94);Gammaproteobacteria{class}(94);Enterobacteriales{order}(94);Enterobacteriaceae{family}(94);Klebsiella{genus}(94);Unassigned{species}(0)	Bacteria	Proteobacteria	Gammaproteobacteria	Enterobacteriales	Enterobacteriaceae	Klebsiella	Unassigned
ASV963	0	0	43	0	0	0	0	0	0	0	0	0	0	0	0	0	0	0	0	0	0	0	0	0	0	0	0	0	0	0	0	0	0	0	0	0	0	0	34	0	77	Bacteria{superkingdom}(100);Firmicutes{phylum}(100);Clostridia{class}(100);Clostridiales{order}(100);Lachnospiraceae{family}(100);Fusicatenibacter{genus}(100);Unassigned{species}(0)	Bacteria	Firmicutes	Clostridia	Clostridiales	Lachnospiraceae	Fusicatenibacter	Unassigned
ASV965	0	0	0	0	0	0	0	0	0	0	0	0	0	0	0	0	0	0	0	0	0	0	0	0	0	0	0	0	0	0	0	0	0	87	0	0	0	0	0	0	87	Bacteria{superkingdom}(99);Proteobacteria{phylum}(99);Deltaproteobacteria{class}(99);Desulfovibrionales{order}(99);Desulfovibrionaceae{family}(99);{genus}(99);uncultured_Desulfovibrio_sp.{species}(99)	Bacteria	Proteobacteria	Deltaproteobacteria	Desulfovibrionales	Desulfovibrionaceae		uncultured_Desulfovibrio_sp.
ASV966	0	0	0	0	0	0	0	0	0	0	0	0	0	0	0	0	0	0	0	0	0	0	0	0	0	0	0	42	0	0	0	0	0	0	0	0	170	0	0	0	212	Bacteria{superkingdom}(89);Bacteroidetes{phylum}(89);Bacteroidia{class}(89);Bacteroidales{order}(89);Bacteroidaceae{family}(89);Bacteroides{genus}(89);Bacteroides_salyersiae{species}(89)	Bacteria	Bacteroidetes	Bacteroidia	Bacteroidales	Bacteroidaceae	Bacteroides	Bacteroides_salyersiae
ASV967	0	0	0	0	0	0	0	0	0	0	0	0	0	0	0	0	0	0	0	0	0	0	0	0	93	0	0	0	0	0	0	0	0	0	0	0	0	0	0	0	93	Bacteria{superkingdom}(100);Firmicutes{phylum}(100);Clostridia{class}(100);Clostridiales{order}(100);Ruminococcaceae{family}(100);Faecalibacterium{genus}(100);Unassigned{species}(0)	Bacteria	Firmicutes	Clostridia	Clostridiales	Ruminococcaceae	Faecalibacterium	Unassigned
ASV971	0	0	0	0	0	0	0	0	0	0	0	0	0	0	0	0	0	0	14	13	0	11	0	0	0	0	4	0	0	0	0	0	9	0	0	0	3	5	0	20	79	Bacteria{superkingdom}(93);Firmicutes{phylum}(93);Clostridia{class}(93);Clostridiales{order}(93);Ruminococcaceae{family}(93);Papillibacter{genus}(93);uncultured_bacterium{species}(93)	Bacteria	Firmicutes	Clostridia	Clostridiales	Ruminococcaceae	Papillibacter	uncultured_bacterium
ASV973	0	0	0	0	0	0	0	0	0	0	0	0	0	0	0	0	0	0	0	0	0	17	0	0	0	0	0	0	0	0	0	0	0	0	0	50	0	0	0	0	67	Bacteria{superkingdom}(100);Bacteroidetes{phylum}(100);Bacteroidia{class}(100);Bacteroidales{order}(100);Porphyromonadaceae{family}(100);Butyricimonas{genus}(100);Unassigned{species}(0)	Bacteria	Bacteroidetes	Bacteroidia	Bacteroidales	Porphyromonadaceae	Butyricimonas	Unassigned
ASV975	6	2	3	6	18	0	30	26	18	8	14	0	0	0	0	2	0	5	0	0	11	0	0	0	3	0	0	0	0	0	0	0	0	0	2	0	1	0	0	6	161	Bacteria{superkingdom}(100);Candidatus_Saccharibacteria{phylum}(100);{class}(100);{order}(100);{family}(100);Saccharibacteria_genera_incertae_sedis{genus}(100);Unassigned{species}(0)	Bacteria	Candidatus_Saccharibacteria				Saccharibacteria_genera_incertae_sedis	Unassigned
ASV976	0	0	0	0	0	57	0	0	0	0	0	0	0	0	0	0	0	0	0	0	0	0	0	0	0	65	0	0	0	0	0	0	0	0	0	0	0	0	0	0	122	Bacteria{superkingdom}(100);Bacteroidetes{phylum}(100);Bacteroidia{class}(100);Bacteroidales{order}(100);Porphyromonadaceae{family}(100);{genus}(100);Unassigned{species}(0)	Bacteria	Bacteroidetes	Bacteroidia	Bacteroidales	Porphyromonadaceae		Unassigned
ASV977	0	0	0	0	0	0	0	0	0	0	0	0	0	0	0	0	0	0	0	0	0	0	0	0	0	0	0	0	0	36	0	0	0	0	0	0	0	0	0	0	36	Bacteria{superkingdom}(93);Firmicutes{phylum}(93);Negativicutes{class}(93);Selenomonadales{order}(93);Veillonellaceae{family}(93);Allisonella{genus}(93);uncultured_bacterium{species}(93)	Bacteria	Firmicutes	Negativicutes	Selenomonadales	Veillonellaceae	Allisonella	uncultured_bacterium
ASV978	0	0	0	0	0	0	0	0	0	0	0	0	0	0	0	0	0	0	6	0	0	0	0	0	0	0	12	0	0	0	0	0	0	0	0	0	8	0	0	0	26	Bacteria{superkingdom}(100);Actinobacteria{phylum}(100);Actinobacteria{class}(100);Coriobacteriales{order}(100);Coriobacteriaceae{family}(100);{genus}(100);Unassigned{species}(0)	Bacteria	Actinobacteria	Actinobacteria	Coriobacteriales	Coriobacteriaceae		Unassigned
ASV980	0	0	0	0	0	0	0	0	0	0	0	0	0	0	0	0	0	0	0	0	0	0	0	0	0	0	0	0	0	0	0	0	0	4	0	0	0	0	0	0	4	Bacteria{superkingdom}(89);Firmicutes{phylum}(89);Clostridia{class}(89);Clostridiales{order}(89);Lachnospiraceae{family}(89);Hungatella{genus}(89);Unassigned{species}(0)	Bacteria	Firmicutes	Clostridia	Clostridiales	Lachnospiraceae	Hungatella	Unassigned
ASV985	0	0	0	0	0	0	0	0	0	0	0	0	0	0	0	0	0	0	0	0	0	0	151	0	0	0	0	0	0	0	0	0	0	0	0	0	0	0	0	0	151	Bacteria{superkingdom}(91);Firmicutes{phylum}(91);Clostridia{class}(91);Clostridiales{order}(91);Peptostreptococcaceae{family}(91);Terrisporobacter{genus}(91);Unassigned{species}(0)	Bacteria	Firmicutes	Clostridia	Clostridiales	Peptostreptococcaceae	Terrisporobacter	Unassigned
ASV988	0	0	0	0	0	0	0	0	0	0	0	0	0	92	0	0	0	0	0	0	0	0	0	0	0	0	0	28	0	11	0	0	0	9	305	0	0	0	0	0	445	Bacteria{superkingdom}(100);Firmicutes{phylum}(100);Clostridia{class}(100);Clostridiales{order}(100);Lachnospiraceae{family}(100);{genus}(100);Unassigned{species}(0)	Bacteria	Firmicutes	Clostridia	Clostridiales	Lachnospiraceae		Unassigned
ASV989	0	0	0	0	0	0	0	0	0	206	0	0	0	0	0	0	0	0	0	0	0	0	0	0	0	0	0	0	0	50	0	0	0	0	0	0	0	0	0	0	256	Bacteria{superkingdom}(100);Firmicutes{phylum}(100);Clostridia{class}(100);Clostridiales{order}(100);Lachnospiraceae{family}(100);Dorea{genus}(100);Unassigned{species}(0)	Bacteria	Firmicutes	Clostridia	Clostridiales	Lachnospiraceae	Dorea	Unassigned
ASV990	0	0	109	0	0	0	0	0	0	0	0	0	0	0	0	0	0	0	0	0	0	0	198	0	0	0	0	0	0	0	0	0	0	0	0	0	0	0	0	0	307	Bacteria{superkingdom}(100);Firmicutes{phylum}(100);Clostridia{class}(100);Clostridiales{order}(100);Ruminococcaceae{family}(100);Faecalibacterium{genus}(100);Unassigned{species}(0)	Bacteria	Firmicutes	Clostridia	Clostridiales	Ruminococcaceae	Faecalibacterium	Unassigned
ASV991	0	0	0	0	0	0	0	0	0	0	0	0	0	0	0	0	0	113	0	0	0	0	0	0	0	0	0	0	0	0	0	0	0	0	0	0	0	0	0	0	113	Bacteria{superkingdom}(100);Firmicutes{phylum}(100);Clostridia{class}(100);Clostridiales{order}(100);Lachnospiraceae{family}(100);Blautia{genus}(100);Unassigned{species}(0)	Bacteria	Firmicutes	Clostridia	Clostridiales	Lachnospiraceae	Blautia	Unassigned
ASV992	0	0	0	0	0	0	0	0	519	0	0	0	0	0	0	0	0	0	0	0	0	0	0	0	0	0	0	0	0	0	0	0	0	0	0	0	0	0	0	0	519	Bacteria{superkingdom}(100);Firmicutes{phylum}(100);Bacilli{class}(100);Lactobacillales{order}(100);Streptococcaceae{family}(100);Streptococcus{genus}(100);Unassigned{species}(0)	Bacteria	Firmicutes	Bacilli	Lactobacillales	Streptococcaceae	Streptococcus	Unassigned
ASV994	0	0	0	0	0	0	0	0	0	0	0	0	0	9	0	0	0	0	0	0	0	0	0	0	0	0	0	0	0	0	0	0	0	0	0	0	0	0	0	0	9	Bacteria{superkingdom}(92);Bacteroidetes{phylum}(92);Bacteroidia{class}(92);Bacteroidales{order}(92);Bacteroidaceae{family}(92);Bacteroides{genus}(92);Bacteroides_vulgatus{species}(92)	Bacteria	Bacteroidetes	Bacteroidia	Bacteroidales	Bacteroidaceae	Bacteroides	Bacteroides_vulgatus
ASV995	0	41	0	0	0	0	0	0	0	0	0	0	0	0	0	0	0	0	31	0	19	0	0	0	0	0	0	0	0	0	0	0	0	0	0	0	0	0	0	0	91	Bacteria{superkingdom}(100);Firmicutes{phylum}(100);Clostridia{class}(100);Clostridiales{order}(100);Lachnospiraceae{family}(100);Blautia{genus}(100);Unassigned{species}(0)	Bacteria	Firmicutes	Clostridia	Clostridiales	Lachnospiraceae	Blautia	Unassigned
ASV996	0	0	0	26	0	0	0	0	0	134	0	0	0	0	0	0	0	0	0	0	0	0	0	0	0	0	35	0	0	90	0	0	0	0	0	0	0	0	0	0	285	Bacteria{superkingdom}(100);Firmicutes{phylum}(100);Clostridia{class}(100);Clostridiales{order}(100);Ruminococcaceae{family}(100);Faecalibacterium{genus}(100);Unassigned{species}(0)	Bacteria	Firmicutes	Clostridia	Clostridiales	Ruminococcaceae	Faecalibacterium	Unassigned
ASV997	0	0	0	0	0	0	0	0	0	0	0	0	0	0	0	0	0	0	0	0	0	0	0	0	0	0	0	0	0	0	0	0	465	0	0	0	0	0	0	0	465	Bacteria{superkingdom}(83);Firmicutes{phylum}(83);Clostridia{class}(83);Clostridiales{order}(83);Ruminococcaceae{family}(83);Oscillibacter{genus}(83);uncultured_rumen_bacterium{species}(83)	Bacteria	Firmicutes	Clostridia	Clostridiales	Ruminococcaceae	Oscillibacter	uncultured_rumen_bacterium
ASV999	0	0	0	0	0	0	0	0	0	0	0	0	0	0	0	0	0	0	0	0	0	0	0	0	0	0	36	0	0	0	0	0	0	0	0	0	0	0	0	0	36	Bacteria{superkingdom}(100);Firmicutes{phylum}(100);Clostridia{class}(100);Clostridiales{order}(100);Ruminococcaceae{family}(100);Oscillibacter{genus}(100);Unassigned{species}(0)	Bacteria	Firmicutes	Clostridia	Clostridiales	Ruminococcaceae	Oscillibacter	Unassigned
ASV1000	0	0	0	0	167	0	39	0	0	0	0	0	0	0	0	0	0	0	0	0	0	0	0	0	160	0	0	0	0	0	0	0	0	15	0	0	0	0	0	0	381	Bacteria{superkingdom}(100);Firmicutes{phylum}(100);Clostridia{class}(100);Clostridiales{order}(100);Lachnospiraceae{family}(100);Unassigned{genus}(0);Unassigned{species}(0)	Bacteria	Firmicutes	Clostridia	Clostridiales	Lachnospiraceae	Unassigned	Unassigned
ASV1001	0	0	0	0	0	0	0	0	0	0	0	0	0	0	0	0	9	19	16	0	0	0	0	49	0	0	0	0	0	0	0	0	0	0	0	0	0	8	0	0	101	Bacteria{superkingdom}(100);Firmicutes{phylum}(100);Clostridia{class}(100);Clostridiales{order}(100);Ruminococcaceae{family}(100);Anaerobacterium{genus}(100);Unassigned{species}(0)	Bacteria	Firmicutes	Clostridia	Clostridiales	Ruminococcaceae	Anaerobacterium	Unassigned
ASV1003	0	0	0	0	0	0	0	0	0	32	0	0	20	0	0	0	0	0	0	0	0	0	0	0	43	0	0	0	0	0	0	0	0	51	0	0	0	0	0	0	146	Bacteria{superkingdom}(100);Firmicutes{phylum}(100);Clostridia{class}(100);Clostridiales{order}(100);Lachnospiraceae{family}(100);Blautia{genus}(100);Unassigned{species}(0)	Bacteria	Firmicutes	Clostridia	Clostridiales	Lachnospiraceae	Blautia	Unassigned
ASV1004	0	0	0	0	0	0	0	0	0	0	0	0	0	0	0	0	0	0	0	0	0	0	0	0	0	0	0	0	0	0	9	0	0	0	0	0	0	0	0	0	9	Bacteria{superkingdom}(98);Bacteroidetes{phylum}(98);Bacteroidia{class}(98);Bacteroidales{order}(98);Porphyromonadaceae{family}(98);Coprobacter{genus}(98);uncultured_organism{species}(98)	Bacteria	Bacteroidetes	Bacteroidia	Bacteroidales	Porphyromonadaceae	Coprobacter	uncultured_organism
ASV1005	0	0	0	0	0	162	0	0	0	0	0	0	0	0	0	0	0	0	0	0	0	0	0	0	0	48	0	0	0	0	0	0	0	0	0	0	0	0	0	0	210	Bacteria{superkingdom}(100);Bacteroidetes{phylum}(100);Bacteroidia{class}(100);Bacteroidales{order}(100);Prevotellaceae{family}(100);Prevotella{genus}(100);Unassigned{species}(0)	Bacteria	Bacteroidetes	Bacteroidia	Bacteroidales	Prevotellaceae	Prevotella	Unassigned
ASV1006	0	0	0	0	0	0	0	0	0	0	0	0	0	0	0	0	0	0	0	0	0	0	0	0	0	0	0	0	0	0	0	0	0	82	0	0	0	0	0	0	82	Bacteria{superkingdom}(98);Proteobacteria{phylum}(98);Deltaproteobacteria{class}(98);Desulfovibrionales{order}(98);Desulfovibrionaceae{family}(98);{genus}(98);uncultured_Desulfovibrio_sp.{species}(98)	Bacteria	Proteobacteria	Deltaproteobacteria	Desulfovibrionales	Desulfovibrionaceae		uncultured_Desulfovibrio_sp.
ASV1007	0	0	0	0	0	65	0	0	0	0	0	0	0	0	0	0	0	0	0	0	0	0	0	0	0	53	0	0	0	0	0	0	0	0	0	0	0	0	0	0	118	Bacteria{superkingdom}(89);Bacteroidetes{phylum}(89);Bacteroidia{class}(89);Bacteroidales{order}(89);Bacteroidaceae{family}(89);Bacteroides{genus}(89);Bacteroides_ovatus{species}(89)	Bacteria	Bacteroidetes	Bacteroidia	Bacteroidales	Bacteroidaceae	Bacteroides	Bacteroides_ovatus
ASV1013	0	0	0	0	0	0	0	0	0	0	0	0	0	0	0	0	1	0	17	0	0	0	0	0	0	0	6	0	0	0	0	12	0	0	0	0	0	3	0	0	39	Bacteria{superkingdom}(94);Firmicutes{phylum}(94);Clostridia{class}(94);Clostridiales{order}(94);Clostridiales_Incertae_Sedis_XIII{family}(94);Anaerovorax{genus}(94);uncultured_Firmicutes_bacterium{species}(94)	Bacteria	Firmicutes	Clostridia	Clostridiales	Clostridiales_Incertae_Sedis_XIII	Anaerovorax	uncultured_Firmicutes_bacterium
ASV1015	0	0	0	0	0	0	2	0	0	0	0	0	0	0	0	0	0	0	15	0	0	0	0	0	0	0	7	0	0	0	0	0	0	0	0	0	0	0	0	0	24	Bacteria{superkingdom}(100);Firmicutes{phylum}(100);Clostridia{class}(100);Clostridiales{order}(100);Catabacteriaceae{family}(100);Catabacter{genus}(100);uncultured_bacterium{species}(100)	Bacteria	Firmicutes	Clostridia	Clostridiales	Catabacteriaceae	Catabacter	uncultured_bacterium
ASV1016	0	0	0	0	0	0	0	0	0	0	0	0	0	0	0	0	0	0	0	0	0	8	0	0	0	0	0	0	0	0	0	0	0	0	0	0	0	0	0	0	8	Bacteria{superkingdom}(89);Bacteroidetes{phylum}(89);Bacteroidia{class}(89);Bacteroidales{order}(89);Porphyromonadaceae{family}(89);{genus}(89);uncultured_Tannerella_sp.{species}(89)	Bacteria	Bacteroidetes	Bacteroidia	Bacteroidales	Porphyromonadaceae		uncultured_Tannerella_sp.
ASV1019	0	0	72	0	0	0	0	0	0	0	0	0	0	0	0	0	0	0	0	0	0	0	69	0	0	0	0	0	0	0	0	0	104	0	0	0	0	0	0	0	245	Bacteria{superkingdom}(100);Firmicutes{phylum}(100);Clostridia{class}(100);Clostridiales{order}(100);Lachnospiraceae{family}(100);Blautia{genus}(100);Unassigned{species}(0)	Bacteria	Firmicutes	Clostridia	Clostridiales	Lachnospiraceae	Blautia	Unassigned
ASV1023	0	0	0	0	130	0	0	0	0	0	0	25	0	0	0	0	0	0	0	0	0	0	0	0	213	0	0	0	0	0	0	41	0	0	0	0	0	0	0	0	409	Bacteria{superkingdom}(100);Firmicutes{phylum}(100);Clostridia{class}(100);Clostridiales{order}(100);Lachnospiraceae{family}(100);Lachnospiracea_incertae_sedis{genus}(100);Unassigned{species}(0)	Bacteria	Firmicutes	Clostridia	Clostridiales	Lachnospiraceae	Lachnospiracea_incertae_sedis	Unassigned
ASV1026	0	0	0	0	0	0	0	0	0	0	0	0	0	0	0	0	0	0	17	0	0	0	0	0	0	0	8	0	0	0	0	0	0	0	0	0	0	0	0	0	25	Bacteria{superkingdom}(93);Firmicutes{phylum}(93);Clostridia{class}(93);Clostridiales{order}(93);Clostridiales_Incertae_Sedis_XIII{family}(93);Anaerovorax{genus}(93);uncultured_bacterium{species}(93)	Bacteria	Firmicutes	Clostridia	Clostridiales	Clostridiales_Incertae_Sedis_XIII	Anaerovorax	uncultured_bacterium
ASV1028	0	7	0	0	0	3	24	0	6	0	0	0	0	0	0	0	0	10	4	0	2	0	0	7	6	12	22	0	12	3	0	0	7	0	0	0	6	0	0	0	131	Bacteria{superkingdom}(100);Actinobacteria{phylum}(100);Actinobacteria{class}(100);Coriobacteriales{order}(100);Coriobacteriaceae{family}(100);Gordonibacter{genus}(100);Unassigned{species}(0)	Bacteria	Actinobacteria	Actinobacteria	Coriobacteriales	Coriobacteriaceae	Gordonibacter	Unassigned
ASV1032	0	0	0	0	0	0	0	0	0	0	0	0	0	0	0	0	0	0	0	0	0	0	160	0	0	0	0	0	0	0	0	0	0	0	0	0	0	0	0	0	160	Bacteria{superkingdom}(97);Firmicutes{phylum}(97);Clostridia{class}(97);Clostridiales{order}(97);Peptostreptococcaceae{family}(97);Terrisporobacter{genus}(97);Unassigned{species}(0)	Bacteria	Firmicutes	Clostridia	Clostridiales	Peptostreptococcaceae	Terrisporobacter	Unassigned
ASV1034	0	0	0	0	0	0	0	0	0	0	0	0	0	0	0	0	0	0	32	0	0	0	0	0	0	19	0	0	0	0	0	0	0	0	0	0	0	0	0	0	51	Bacteria{superkingdom}(85);Firmicutes{phylum}(85);Clostridia{class}(85);Clostridiales{order}(85);Lachnospiraceae{family}(85);{genus}(85);Unassigned{species}(0)	Bacteria	Firmicutes	Clostridia	Clostridiales	Lachnospiraceae		Unassigned
ASV1036	0	0	0	0	0	0	0	0	0	0	0	0	151	0	0	0	47	0	0	0	0	0	0	0	0	0	0	0	0	0	0	0	0	0	0	0	0	0	0	0	198	Bacteria{superkingdom}(100);Firmicutes{phylum}(100);Clostridia{class}(100);Clostridiales{order}(100);Peptostreptococcaceae{family}(100);Romboutsia{genus}(100);Unassigned{species}(0)	Bacteria	Firmicutes	Clostridia	Clostridiales	Peptostreptococcaceae	Romboutsia	Unassigned
ASV1037	0	0	0	0	0	0	0	18	0	0	0	0	0	0	0	0	31	0	0	0	0	17	0	0	0	0	0	0	0	0	0	0	0	0	0	0	0	32	0	0	98	Bacteria{superkingdom}(100);Firmicutes{phylum}(100);Negativicutes{class}(100);Selenomonadales{order}(100);Veillonellaceae{family}(100);Veillonella{genus}(100);Unassigned{species}(0)	Bacteria	Firmicutes	Negativicutes	Selenomonadales	Veillonellaceae	Veillonella	Unassigned
ASV1038	0	0	0	0	0	0	0	0	0	0	0	4	0	0	0	0	9	0	0	0	0	0	0	0	0	0	3	0	0	0	0	0	0	0	0	0	0	0	0	0	16	Bacteria{superkingdom}(92);Firmicutes{phylum}(92);Clostridia{class}(92);Clostridiales{order}(92);{family}(92);{genus}(92);uncultured_rumen_bacterium{species}(92)	Bacteria	Firmicutes	Clostridia	Clostridiales			uncultured_rumen_bacterium
ASV1040	0	0	0	0	0	0	0	0	0	0	0	0	0	0	0	0	0	0	0	0	0	0	0	0	0	0	0	0	0	0	0	0	0	32	0	0	0	0	0	0	32	Bacteria{superkingdom}(100);Firmicutes{phylum}(100);Clostridia{class}(100);Clostridiales{order}(100);Unassigned{family}(0);Unassigned{genus}(0);Unassigned{species}(0)	Bacteria	Firmicutes	Clostridia	Clostridiales	Unassigned	Unassigned	Unassigned
ASV1042	0	0	0	0	0	0	0	0	0	21	0	6	0	4	0	0	0	0	0	0	0	0	0	0	0	7	5	0	0	11	0	0	0	2	7	0	0	0	0	0	63	Bacteria{superkingdom}(98);Firmicutes{phylum}(98);Clostridia{class}(98);Clostridiales{order}(98);Lachnospiraceae{family}(98);Clostridium_XlVa{genus}(98);Unassigned{species}(0)	Bacteria	Firmicutes	Clostridia	Clostridiales	Lachnospiraceae	Clostridium_XlVa	Unassigned
ASV1044	0	0	0	0	0	0	0	0	0	0	0	0	0	0	0	0	0	0	0	0	0	0	0	0	0	0	0	0	0	0	0	0	124	47	0	0	0	0	0	0	171	Bacteria{superkingdom}(100);Firmicutes{phylum}(100);Clostridia{class}(100);Clostridiales{order}(100);Lachnospiraceae{family}(100);Dorea{genus}(100);Unassigned{species}(0)	Bacteria	Firmicutes	Clostridia	Clostridiales	Lachnospiraceae	Dorea	Unassigned
ASV1045	0	0	0	0	0	0	0	0	44	0	16	0	0	0	23	0	0	8	0	0	0	20	0	0	0	0	0	0	0	0	5	0	0	0	0	6	0	0	0	0	122	Bacteria{superkingdom}(100);Firmicutes{phylum}(100);Bacilli{class}(100);Lactobacillales{order}(100);Carnobacteriaceae{family}(100);Granulicatella{genus}(100);Unassigned{species}(0)	Bacteria	Firmicutes	Bacilli	Lactobacillales	Carnobacteriaceae	Granulicatella	Unassigned
ASV1046	0	0	0	0	0	0	0	0	0	147	0	0	0	0	0	0	0	0	0	0	0	0	0	0	0	0	0	0	0	121	0	0	0	0	0	0	0	0	0	0	268	Bacteria{superkingdom}(100);Firmicutes{phylum}(100);Clostridia{class}(100);Clostridiales{order}(100);Ruminococcaceae{family}(100);Faecalibacterium{genus}(100);Unassigned{species}(0)	Bacteria	Firmicutes	Clostridia	Clostridiales	Ruminococcaceae	Faecalibacterium	Unassigned
ASV1048	0	0	0	0	0	0	0	0	0	0	0	0	0	0	0	0	0	0	0	0	0	0	0	0	0	0	54	0	0	0	0	0	0	0	0	0	0	0	0	0	54	Bacteria{superkingdom}(100);Bacteroidetes{phylum}(100);Bacteroidia{class}(100);Bacteroidales{order}(100);Bacteroidaceae{family}(100);Bacteroides{genus}(100);Unassigned{species}(0)	Bacteria	Bacteroidetes	Bacteroidia	Bacteroidales	Bacteroidaceae	Bacteroides	Unassigned
ASV1049	0	0	0	0	0	0	0	0	0	0	0	35	0	10	0	0	0	4	0	0	0	0	0	0	0	0	23	0	0	0	9	0	15	0	0	31	0	5	0	0	132	Bacteria{superkingdom}(83);Bacteroidetes{phylum}(83);Bacteroidia{class}(83);Bacteroidales{order}(83);Bacteroidaceae{family}(83);Bacteroides{genus}(83);Bacteroides_nordii{species}(83)	Bacteria	Bacteroidetes	Bacteroidia	Bacteroidales	Bacteroidaceae	Bacteroides	Bacteroides_nordii
ASV1051	0	0	0	0	0	0	0	0	0	0	0	0	0	0	0	0	0	0	16	0	0	0	0	0	0	0	0	0	0	0	0	0	15	0	0	0	0	0	0	0	31	Bacteria{superkingdom}(100);Firmicutes{phylum}(100);Clostridia{class}(100);Clostridiales{order}(100);Ruminococcaceae{family}(100);{genus}(100);Unassigned{species}(0)	Bacteria	Firmicutes	Clostridia	Clostridiales	Ruminococcaceae		Unassigned
ASV1053	0	0	0	139	0	0	0	0	0	0	0	0	0	0	0	0	0	0	0	0	0	0	0	265	0	0	0	0	0	0	0	0	0	0	0	0	0	0	0	0	404	Bacteria{superkingdom}(100);Firmicutes{phylum}(100);Clostridia{class}(100);Clostridiales{order}(100);Ruminococcaceae{family}(100);Faecalibacterium{genus}(100);Unassigned{species}(0)	Bacteria	Firmicutes	Clostridia	Clostridiales	Ruminococcaceae	Faecalibacterium	Unassigned
ASV1054	0	0	0	0	0	0	0	0	0	0	0	0	0	0	0	0	0	0	144	0	0	0	0	0	0	0	0	0	0	0	0	0	0	0	0	0	0	0	0	0	144	Bacteria{superkingdom}(100);Bacteroidetes{phylum}(100);Bacteroidia{class}(100);Bacteroidales{order}(100);Prevotellaceae{family}(100);Prevotella{genus}(100);Unassigned{species}(0)	Bacteria	Bacteroidetes	Bacteroidia	Bacteroidales	Prevotellaceae	Prevotella	Unassigned
ASV1058	0	0	0	0	0	0	0	0	0	0	0	0	0	0	0	0	0	0	0	0	0	6	0	0	0	0	0	0	0	0	0	0	0	0	0	0	0	0	0	0	6	Bacteria{superkingdom}(100);Bacteroidetes{phylum}(100);Bacteroidia{class}(100);Bacteroidales{order}(100);Porphyromonadaceae{family}(100);Butyricimonas{genus}(100);Unassigned{species}(0)	Bacteria	Bacteroidetes	Bacteroidia	Bacteroidales	Porphyromonadaceae	Butyricimonas	Unassigned
ASV1061	0	0	0	0	0	0	0	0	0	0	0	0	0	65	0	0	0	0	0	0	0	0	0	0	0	0	0	0	0	0	0	0	0	0	113	0	0	0	0	0	178	Bacteria{superkingdom}(100);Firmicutes{phylum}(100);Clostridia{class}(100);Clostridiales{order}(100);Lachnospiraceae{family}(100);Lachnospiracea_incertae_sedis{genus}(100);Unassigned{species}(0)	Bacteria	Firmicutes	Clostridia	Clostridiales	Lachnospiraceae	Lachnospiracea_incertae_sedis	Unassigned
ASV1062	0	0	0	0	95	146	0	0	0	0	0	0	0	0	0	0	0	0	0	0	0	0	0	0	36	66	0	0	0	0	0	0	0	0	0	0	0	0	0	0	343	Bacteria{superkingdom}(100);Firmicutes{phylum}(100);Clostridia{class}(100);Clostridiales{order}(100);Lachnospiraceae{family}(100);Unassigned{genus}(0);Unassigned{species}(0)	Bacteria	Firmicutes	Clostridia	Clostridiales	Lachnospiraceae	Unassigned	Unassigned
ASV1063	0	0	0	0	114	0	0	0	0	0	0	35	0	0	0	0	0	0	0	0	0	0	0	0	171	0	0	0	0	0	0	45	0	0	0	0	0	0	0	0	365	Bacteria{superkingdom}(80);Firmicutes{phylum}(80);Clostridia{class}(80);Clostridiales{order}(80);Lachnospiraceae{family}(80);Lachnospiracea_incertae_sedis{genus}(80);uncultured_Eubacteriaceae_bacterium{species}(80)	Bacteria	Firmicutes	Clostridia	Clostridiales	Lachnospiraceae	Lachnospiracea_incertae_sedis	uncultured_Eubacteriaceae_bacterium
ASV1064	0	0	0	0	0	0	0	0	0	0	0	0	0	0	0	0	0	0	0	0	0	0	0	0	0	0	0	0	0	0	0	0	0	20	0	0	0	0	0	0	20	Bacteria{superkingdom}(85);Firmicutes{phylum}(85);Clostridia{class}(85);Clostridiales{order}(85);Lachnospiraceae{family}(85);Clostridium_XlVa{genus}(85);Unassigned{species}(0)	Bacteria	Firmicutes	Clostridia	Clostridiales	Lachnospiraceae	Clostridium_XlVa	Unassigned
ASV1065	0	0	0	0	0	0	0	71	0	0	0	0	0	0	0	0	0	0	0	0	0	0	0	0	0	0	0	125	0	0	0	0	0	0	0	0	0	0	0	0	196	Bacteria{superkingdom}(100);Proteobacteria{phylum}(100);Gammaproteobacteria{class}(100);Enterobacteriales{order}(100);Enterobacteriaceae{family}(100);Escherichia/Shigella{genus}(100);Unassigned{species}(0)	Bacteria	Proteobacteria	Gammaproteobacteria	Enterobacteriales	Enterobacteriaceae	Escherichia/Shigella	Unassigned
ASV1068	0	0	0	0	0	0	0	0	0	0	0	0	0	0	0	0	0	0	0	0	0	0	0	81	0	0	0	0	0	0	0	0	0	0	0	0	0	0	0	0	81	Bacteria{superkingdom}(100);Proteobacteria{phylum}(100);Gammaproteobacteria{class}(100);Enterobacteriales{order}(100);Enterobacteriaceae{family}(100);Escherichia/Shigella{genus}(100);Unassigned{species}(0)	Bacteria	Proteobacteria	Gammaproteobacteria	Enterobacteriales	Enterobacteriaceae	Escherichia/Shigella	Unassigned
ASV1069	0	0	0	0	0	140	0	0	0	0	0	0	0	0	0	0	0	0	0	0	0	0	0	0	0	211	0	0	0	0	0	0	0	0	0	0	0	0	0	0	351	Bacteria{superkingdom}(100);Bacteroidetes{phylum}(100);Bacteroidia{class}(100);Bacteroidales{order}(100);Bacteroidaceae{family}(100);Bacteroides{genus}(100);Bacteroides_coprocola{species}(100)	Bacteria	Bacteroidetes	Bacteroidia	Bacteroidales	Bacteroidaceae	Bacteroides	Bacteroides_coprocola
ASV1070	0	0	0	0	0	0	0	0	0	0	0	0	0	101	0	0	0	0	0	0	0	0	0	0	0	0	0	0	0	0	0	0	0	0	282	0	0	0	0	0	383	Bacteria{superkingdom}(100);Firmicutes{phylum}(100);Clostridia{class}(100);Clostridiales{order}(100);Lachnospiraceae{family}(100);{genus}(100);Unassigned{species}(0)	Bacteria	Firmicutes	Clostridia	Clostridiales	Lachnospiraceae		Unassigned
ASV1073	0	0	0	0	0	0	0	0	0	0	0	0	0	0	0	364	0	0	0	0	0	0	0	0	0	0	0	46	0	0	0	0	0	0	0	0	0	0	0	0	410	Bacteria{superkingdom}(100);Firmicutes{phylum}(100);Clostridia{class}(100);Clostridiales{order}(100);Lachnospiraceae{family}(100);Roseburia{genus}(100);Unassigned{species}(0)	Bacteria	Firmicutes	Clostridia	Clostridiales	Lachnospiraceae	Roseburia	Unassigned
ASV1075	0	0	0	0	0	0	0	0	0	0	0	1	0	0	0	0	22	0	0	0	0	0	0	0	0	0	0	0	0	0	0	41	0	0	0	0	0	62	0	0	126	Bacteria{superkingdom}(92);Bacteroidetes{phylum}(92);Bacteroidia{class}(92);Bacteroidales{order}(92);Porphyromonadaceae{family}(92);Parabacteroides{genus}(92);Parabacteroides_distasonis{species}(92)	Bacteria	Bacteroidetes	Bacteroidia	Bacteroidales	Porphyromonadaceae	Parabacteroides	Parabacteroides_distasonis
ASV1080	0	0	0	0	0	0	0	0	0	0	0	0	0	0	0	0	175	0	0	0	0	0	0	0	0	0	0	0	0	0	0	0	0	0	0	0	0	212	0	0	387	Bacteria{superkingdom}(100);Bacteroidetes{phylum}(100);Bacteroidia{class}(100);Bacteroidales{order}(100);Prevotellaceae{family}(100);Prevotella{genus}(100);Unassigned{species}(0)	Bacteria	Bacteroidetes	Bacteroidia	Bacteroidales	Prevotellaceae	Prevotella	Unassigned
ASV1081	0	0	0	0	0	0	0	0	0	0	0	0	0	0	0	0	0	0	3	0	0	0	0	0	0	0	75	0	0	0	0	0	0	0	0	0	0	0	0	0	78	Bacteria{superkingdom}(96);Firmicutes{phylum}(96);Clostridia{class}(96);Clostridiales{order}(96);Catabacteriaceae{family}(96);Catabacter{genus}(96);uncultured_bacterium{species}(96)	Bacteria	Firmicutes	Clostridia	Clostridiales	Catabacteriaceae	Catabacter	uncultured_bacterium
ASV1082	0	0	0	0	0	0	0	0	0	0	0	0	0	0	0	0	0	0	0	161	0	0	0	0	0	0	0	0	0	0	0	0	0	0	0	0	0	0	0	212	373	Bacteria{superkingdom}(97);Firmicutes{phylum}(97);Erysipelotrichia{class}(97);Erysipelotrichales{order}(97);Erysipelotrichaceae{family}(97);Clostridium_XVIII{genus}(97);Unassigned{species}(0)	Bacteria	Firmicutes	Erysipelotrichia	Erysipelotrichales	Erysipelotrichaceae	Clostridium_XVIII	Unassigned
ASV1084	0	0	0	0	0	0	0	0	0	0	0	0	0	0	0	0	0	0	28	0	0	0	0	0	0	0	0	0	0	0	0	0	0	0	0	0	0	0	0	0	28	Bacteria{superkingdom}(100);Firmicutes{phylum}(100);{class}(100);{order}(100);{family}(100);{genus}(100);uncultured_Bacteroidetes_bacterium{species}(100)	Bacteria	Firmicutes					uncultured_Bacteroidetes_bacterium
ASV1085	30	0	0	0	0	0	0	0	0	0	0	0	0	0	0	0	0	0	0	0	0	0	0	0	0	0	0	0	0	0	46	0	0	0	0	0	0	0	0	0	76	Bacteria{superkingdom}(100);Firmicutes{phylum}(100);Clostridia{class}(100);Clostridiales{order}(100);Ruminococcaceae{family}(100);Butyricicoccus{genus}(100);Unassigned{species}(0)	Bacteria	Firmicutes	Clostridia	Clostridiales	Ruminococcaceae	Butyricicoccus	Unassigned
ASV1087	0	0	0	0	0	0	0	0	0	0	21	0	0	0	0	0	0	0	0	0	0	0	0	0	0	0	0	0	0	0	0	0	0	0	0	0	0	0	0	0	21	Bacteria{superkingdom}(100);Firmicutes{phylum}(100);Clostridia{class}(100);Clostridiales{order}(100);Lachnospiraceae{family}(100);Blautia{genus}(100);Unassigned{species}(0)	Bacteria	Firmicutes	Clostridia	Clostridiales	Lachnospiraceae	Blautia	Unassigned
ASV1089	0	0	0	0	0	0	11	0	0	0	5	47	0	0	0	0	0	0	0	0	0	0	0	0	0	0	8	0	0	0	0	19	0	0	0	0	0	0	0	0	90	Bacteria{superkingdom}(100);Firmicutes{phylum}(100);Clostridia{class}(100);Clostridiales{order}(100);Ruminococcaceae{family}(100);Ruminococcus{genus}(100);Unassigned{species}(0)	Bacteria	Firmicutes	Clostridia	Clostridiales	Ruminococcaceae	Ruminococcus	Unassigned
ASV1090	0	0	0	0	0	0	0	0	0	0	160	0	0	0	0	0	0	0	0	0	0	0	0	0	0	0	0	0	0	0	0	0	0	0	0	0	0	0	0	0	160	Bacteria{superkingdom}(100);Proteobacteria{phylum}(100);Gammaproteobacteria{class}(100);Enterobacteriales{order}(100);Enterobacteriaceae{family}(100);Escherichia/Shigella{genus}(100);Unassigned{species}(0)	Bacteria	Proteobacteria	Gammaproteobacteria	Enterobacteriales	Enterobacteriaceae	Escherichia/Shigella	Unassigned
ASV1093	0	0	0	0	0	0	0	0	0	0	0	0	155	0	0	0	0	0	0	0	0	0	0	0	0	0	0	0	0	0	0	0	0	0	0	0	0	0	0	0	155	Bacteria{superkingdom}(97);Firmicutes{phylum}(97);Clostridia{class}(97);Clostridiales{order}(97);Lachnospiraceae{family}(97);Clostridium_XlVa{genus}(97);Unassigned{species}(0)	Bacteria	Firmicutes	Clostridia	Clostridiales	Lachnospiraceae	Clostridium_XlVa	Unassigned
ASV1095	0	0	0	0	0	0	0	0	0	0	31	0	0	0	135	0	0	0	0	0	0	0	0	44	0	0	0	0	0	0	0	0	0	0	0	0	0	0	0	0	210	Bacteria{superkingdom}(100);Firmicutes{phylum}(100);Clostridia{class}(100);Clostridiales{order}(100);Lachnospiraceae{family}(100);Dorea{genus}(100);Unassigned{species}(0)	Bacteria	Firmicutes	Clostridia	Clostridiales	Lachnospiraceae	Dorea	Unassigned
ASV1096	0	0	0	0	32	0	0	0	26	0	0	0	0	11	0	0	0	0	0	0	0	0	0	0	0	0	0	0	0	0	0	0	0	0	0	0	0	0	0	0	69	Bacteria{superkingdom}(82);Proteobacteria{phylum}(82);Gammaproteobacteria{class}(82);Enterobacteriales{order}(82);Enterobacteriaceae{family}(82);Enterobacter{genus}(82);Unassigned{species}(0)	Bacteria	Proteobacteria	Gammaproteobacteria	Enterobacteriales	Enterobacteriaceae	Enterobacter	Unassigned
ASV1099	0	0	0	0	0	102	0	0	0	0	0	0	0	0	0	0	0	0	0	0	0	0	0	0	0	117	0	0	0	0	0	0	0	0	0	0	8	0	0	0	227	Bacteria{superkingdom}(99);Firmicutes{phylum}(99);Clostridia{class}(99);Clostridiales{order}(99);Lachnospiraceae{family}(99);Coprococcus{genus}(99);Unassigned{species}(0)	Bacteria	Firmicutes	Clostridia	Clostridiales	Lachnospiraceae	Coprococcus	Unassigned
ASV1101	0	0	0	0	0	0	0	0	0	0	0	0	0	0	0	0	0	0	0	0	0	0	0	0	0	0	0	0	0	0	0	0	0	78	0	0	0	0	0	0	78	Bacteria{superkingdom}(100);Firmicutes{phylum}(100);Clostridia{class}(100);Clostridiales{order}(100);Peptococcaceae_1{family}(100);Peptococcus{genus}(100);uncultured_bacterium{species}(100)	Bacteria	Firmicutes	Clostridia	Clostridiales	Peptococcaceae_1	Peptococcus	uncultured_bacterium
ASV1103	0	0	0	0	0	0	0	0	0	0	0	0	0	0	0	0	0	0	0	0	0	0	0	0	0	0	0	0	0	3	0	0	0	0	0	0	0	0	0	0	3	Bacteria{superkingdom}(91);Firmicutes{phylum}(91);Bacilli{class}(91);Lactobacillales{order}(91);Lactobacillaceae{family}(91);Lactobacillus{genus}(91);Lactobacillus_oris{species}(91)	Bacteria	Firmicutes	Bacilli	Lactobacillales	Lactobacillaceae	Lactobacillus	Lactobacillus_oris
ASV1106	0	0	0	0	0	0	0	0	0	0	0	0	0	0	0	0	0	0	0	0	0	0	0	0	0	0	0	0	0	0	0	0	0	323	0	0	0	0	0	0	323	Bacteria{superkingdom}(81);Firmicutes{phylum}(81);Clostridia{class}(81);Clostridiales{order}(81);Lachnospiraceae{family}(81);{genus}(81);Unassigned{species}(0)	Bacteria	Firmicutes	Clostridia	Clostridiales	Lachnospiraceae		Unassigned
ASV1108	0	0	0	0	0	0	0	0	0	0	0	0	0	0	0	0	0	0	0	0	0	0	0	0	0	0	0	0	0	0	85	0	0	0	0	0	0	0	0	0	85	Bacteria{superkingdom}(94);Bacteroidetes{phylum}(94);Bacteroidia{class}(94);Bacteroidales{order}(94);Bacteroidaceae{family}(94);Bacteroides{genus}(94);Bacteroides_intestinalis{species}(94)	Bacteria	Bacteroidetes	Bacteroidia	Bacteroidales	Bacteroidaceae	Bacteroides	Bacteroides_intestinalis
ASV1109	0	0	0	11	0	0	0	0	0	35	0	0	0	0	0	0	0	0	0	0	0	0	0	47	0	0	0	28	0	38	0	0	0	0	28	0	0	0	0	0	187	Bacteria{superkingdom}(98);Firmicutes{phylum}(98);Clostridia{class}(98);Clostridiales{order}(98);Ruminococcaceae{family}(98);Intestinimonas{genus}(98);uncultured_rumen_bacterium{species}(98)	Bacteria	Firmicutes	Clostridia	Clostridiales	Ruminococcaceae	Intestinimonas	uncultured_rumen_bacterium
ASV1111	0	0	0	0	0	0	0	0	0	0	0	0	0	0	0	0	0	0	0	0	0	210	0	0	0	0	0	0	0	0	0	0	0	0	0	0	0	0	0	0	210	Bacteria{superkingdom}(100);Firmicutes{phylum}(100);Erysipelotrichia{class}(100);Erysipelotrichales{order}(100);Erysipelotrichaceae{family}(100);Holdemanella{genus}(100);Unassigned{species}(0)	Bacteria	Firmicutes	Erysipelotrichia	Erysipelotrichales	Erysipelotrichaceae	Holdemanella	Unassigned
ASV1115	0	15	0	0	0	0	0	0	0	0	0	0	0	22	0	0	0	0	0	0	0	0	0	0	0	0	0	0	0	0	0	0	0	0	133	0	0	0	0	0	170	Bacteria{superkingdom}(100);Firmicutes{phylum}(100);Erysipelotrichia{class}(100);Erysipelotrichales{order}(100);Erysipelotrichaceae{family}(100);Erysipelotrichaceae_incertae_sedis{genus}(100);Unassigned{species}(0)	Bacteria	Firmicutes	Erysipelotrichia	Erysipelotrichales	Erysipelotrichaceae	Erysipelotrichaceae_incertae_sedis	Unassigned
ASV1116	0	0	0	0	0	0	0	0	0	0	0	0	0	0	0	0	158	0	0	0	0	0	0	0	0	0	0	0	0	0	0	0	0	0	0	0	0	229	0	0	387	Bacteria{superkingdom}(100);Bacteroidetes{phylum}(100);Bacteroidia{class}(100);Bacteroidales{order}(100);Prevotellaceae{family}(100);Prevotella{genus}(100);Unassigned{species}(0)	Bacteria	Bacteroidetes	Bacteroidia	Bacteroidales	Prevotellaceae	Prevotella	Unassigned
ASV1117	0	0	0	0	0	0	0	0	0	0	0	0	0	0	0	0	0	0	14	0	0	0	0	0	0	0	0	0	0	0	0	0	30	0	0	0	0	0	0	0	44	Bacteria{superkingdom}(97);Firmicutes{phylum}(97);Clostridia{class}(97);Clostridiales{order}(97);Ruminococcaceae{family}(97);{genus}(97);Unassigned{species}(0)	Bacteria	Firmicutes	Clostridia	Clostridiales	Ruminococcaceae		Unassigned
ASV1118	0	0	0	0	0	0	0	0	0	0	0	0	0	0	0	0	0	0	0	0	0	0	0	0	0	0	0	0	0	0	0	0	0	211	0	0	0	0	0	0	211	Bacteria{superkingdom}(100);Firmicutes{phylum}(100);Bacilli{class}(100);Lactobacillales{order}(100);Enterococcaceae{family}(100);Enterococcus{genus}(100);Unassigned{species}(0)	Bacteria	Firmicutes	Bacilli	Lactobacillales	Enterococcaceae	Enterococcus	Unassigned
ASV1120	0	0	0	0	0	0	0	0	0	0	0	0	0	0	0	0	75	0	0	0	0	0	0	0	0	0	0	0	0	0	0	0	0	0	0	0	0	0	0	0	75	Bacteria{superkingdom}(100);Proteobacteria{phylum}(100);Gammaproteobacteria{class}(100);Enterobacteriales{order}(100);Enterobacteriaceae{family}(100);Escherichia/Shigella{genus}(100);Unassigned{species}(0)	Bacteria	Proteobacteria	Gammaproteobacteria	Enterobacteriales	Enterobacteriaceae	Escherichia/Shigella	Unassigned
ASV1121	0	0	0	0	0	0	0	0	0	0	0	0	0	0	0	0	0	0	0	0	0	0	0	23	0	0	0	0	0	0	0	0	0	0	0	0	0	0	0	0	23	Bacteria{superkingdom}(100);Firmicutes{phylum}(100);Clostridia{class}(100);Clostridiales{order}(100);Lachnospiraceae{family}(100);Unassigned{genus}(0);Unassigned{species}(0)	Bacteria	Firmicutes	Clostridia	Clostridiales	Lachnospiraceae	Unassigned	Unassigned
ASV1122	0	0	0	0	0	0	46	0	0	0	0	0	0	35	0	0	0	0	0	0	0	0	0	0	0	0	250	0	0	0	0	0	0	0	0	0	9	0	0	0	340	Bacteria{superkingdom}(100);Bacteroidetes{phylum}(100);Bacteroidia{class}(100);Bacteroidales{order}(100);Rikenellaceae{family}(100);Alistipes{genus}(100);Unassigned{species}(0)	Bacteria	Bacteroidetes	Bacteroidia	Bacteroidales	Rikenellaceae	Alistipes	Unassigned
ASV1123	0	0	0	0	0	0	0	0	0	0	0	0	0	0	0	0	0	0	52	0	0	0	0	0	0	0	0	0	0	0	0	0	0	0	0	0	0	0	0	0	52	Bacteria{superkingdom}(92);Firmicutes{phylum}(92);Clostridia{class}(92);Clostridiales{order}(92);Ruminococcaceae{family}(92);Oscillibacter{genus}(92);uncultured_Bacteroidetes_bacterium{species}(92)	Bacteria	Firmicutes	Clostridia	Clostridiales	Ruminococcaceae	Oscillibacter	uncultured_Bacteroidetes_bacterium
ASV1125	0	0	0	0	0	0	0	0	0	0	0	0	0	0	0	0	0	0	0	0	0	16	0	0	0	0	0	0	0	0	0	0	0	21	0	0	0	0	0	0	37	Bacteria{superkingdom}(96);Firmicutes{phylum}(96);Clostridia{class}(96);Clostridiales{order}(96);Lachnospiraceae{family}(96);{genus}(96);Unassigned{species}(0)	Bacteria	Firmicutes	Clostridia	Clostridiales	Lachnospiraceae		Unassigned
ASV1128	0	12	0	0	0	0	0	0	0	0	0	0	0	0	116	0	0	0	0	0	2	0	0	0	0	0	0	0	0	22	0	0	0	0	0	0	0	0	0	0	152	Bacteria{superkingdom}(100);Firmicutes{phylum}(100);Bacilli{class}(100);Lactobacillales{order}(100);Lactobacillaceae{family}(100);Lactobacillus{genus}(100);Unassigned{species}(0)	Bacteria	Firmicutes	Bacilli	Lactobacillales	Lactobacillaceae	Lactobacillus	Unassigned
ASV1130	0	0	0	0	0	0	0	0	0	0	0	0	0	0	0	0	74	0	0	0	0	0	0	0	0	0	0	0	0	0	0	0	0	0	0	0	0	347	0	0	421	Bacteria{superkingdom}(100);Bacteroidetes{phylum}(100);Bacteroidia{class}(100);Bacteroidales{order}(100);Bacteroidaceae{family}(100);Bacteroides{genus}(100);Bacteroides_coprocola{species}(100)	Bacteria	Bacteroidetes	Bacteroidia	Bacteroidales	Bacteroidaceae	Bacteroides	Bacteroides_coprocola
ASV1134	0	0	0	0	0	0	0	0	0	0	0	0	0	0	0	0	0	0	113	0	0	0	0	0	0	0	25	0	0	0	0	0	0	0	0	0	0	0	0	0	138	Bacteria{superkingdom}(92);Firmicutes{phylum}(92);Clostridia{class}(92);Clostridiales{order}(92);Lachnospiraceae{family}(92);{genus}(92);Unassigned{species}(0)	Bacteria	Firmicutes	Clostridia	Clostridiales	Lachnospiraceae		Unassigned
ASV1135	10	0	0	10	0	0	0	0	0	0	0	0	0	0	0	0	0	2	0	10	0	3	0	35	0	0	14	0	6	4	0	0	4	0	6	0	0	8	0	4	116	Bacteria{superkingdom}(93);Firmicutes{phylum}(93);Clostridia{class}(93);Clostridiales{order}(93);Lachnospiraceae{family}(93);{genus}(93);Unassigned{species}(0)	Bacteria	Firmicutes	Clostridia	Clostridiales	Lachnospiraceae		Unassigned
ASV1136	0	0	0	0	0	0	0	0	0	0	0	0	0	0	0	0	0	0	5	0	0	0	0	0	0	0	0	0	0	0	0	0	0	0	0	0	0	0	0	0	5	Bacteria{superkingdom}(80);Firmicutes{phylum}(80);Clostridia{class}(80);Clostridiales{order}(80);Ruminococcaceae{family}(80);Anaerobacterium{genus}(80);uncultured_rumen_bacterium{species}(80)	Bacteria	Firmicutes	Clostridia	Clostridiales	Ruminococcaceae	Anaerobacterium	uncultured_rumen_bacterium
ASV1137	0	0	22	0	0	0	0	0	0	0	0	0	0	0	0	0	0	0	0	0	0	0	0	0	0	0	0	0	0	0	0	0	0	0	0	0	0	0	0	0	22	Bacteria{superkingdom}(100);Firmicutes{phylum}(100);Erysipelotrichia{class}(100);Erysipelotrichales{order}(100);Erysipelotrichaceae{family}(100);Erysipelotrichaceae_incertae_sedis{genus}(100);Unassigned{species}(0)	Bacteria	Firmicutes	Erysipelotrichia	Erysipelotrichales	Erysipelotrichaceae	Erysipelotrichaceae_incertae_sedis	Unassigned
ASV1139	0	0	0	0	0	0	0	0	0	0	0	3	0	0	0	7	20	0	0	0	0	0	0	0	0	0	0	0	0	0	0	0	0	0	0	0	0	0	0	0	30	Bacteria{superkingdom}(100);Firmicutes{phylum}(100);Negativicutes{class}(100);Selenomonadales{order}(100);Veillonellaceae{family}(100);Veillonella{genus}(100);Unassigned{species}(0)	Bacteria	Firmicutes	Negativicutes	Selenomonadales	Veillonellaceae	Veillonella	Unassigned
ASV1140	0	0	0	0	0	33	0	0	0	0	0	0	0	0	0	0	0	0	0	0	0	0	0	0	0	54	0	0	0	0	0	0	0	0	0	0	0	0	0	0	87	Bacteria{superkingdom}(100);Firmicutes{phylum}(100);Clostridia{class}(100);Clostridiales{order}(100);Lachnospiraceae{family}(100);Blautia{genus}(100);Unassigned{species}(0)	Bacteria	Firmicutes	Clostridia	Clostridiales	Lachnospiraceae	Blautia	Unassigned
ASV1144	0	0	0	0	0	0	0	0	0	0	0	0	0	0	0	0	0	0	0	0	0	0	0	0	0	0	12	0	0	0	0	0	0	0	0	0	0	0	0	0	12	Bacteria{superkingdom}(88);Firmicutes{phylum}(88);Clostridia{class}(88);Clostridiales{order}(88);Lachnospiraceae{family}(88);{genus}(88);uncultured_bacterium_adhufec49.25{species}(88)	Bacteria	Firmicutes	Clostridia	Clostridiales	Lachnospiraceae		uncultured_bacterium_adhufec49.25
ASV1145	0	0	0	0	0	0	0	0	0	0	0	0	0	0	0	0	0	0	0	0	0	62	0	0	0	0	0	0	0	0	0	0	0	0	0	0	0	0	0	0	62	Bacteria{superkingdom}(92);Bacteroidetes{phylum}(92);Bacteroidia{class}(92);Bacteroidales{order}(92);Prevotellaceae{family}(92);Paraprevotella{genus}(92);uncultured_organism{species}(92)	Bacteria	Bacteroidetes	Bacteroidia	Bacteroidales	Prevotellaceae	Paraprevotella	uncultured_organism
ASV1148	0	0	0	0	0	0	0	0	0	0	0	0	0	0	0	0	0	0	341	0	0	0	0	0	0	0	0	0	0	0	0	0	0	0	0	0	0	0	0	0	341	Bacteria{superkingdom}(83);Firmicutes{phylum}(83);Negativicutes{class}(83);Selenomonadales{order}(83);Veillonellaceae{family}(83);Dialister{genus}(83);Unassigned{species}(0)	Bacteria	Firmicutes	Negativicutes	Selenomonadales	Veillonellaceae	Dialister	Unassigned
ASV1149	17	0	0	8	0	0	16	0	0	0	0	0	0	0	10	0	0	0	0	0	0	22	0	0	0	0	6	0	0	0	0	0	0	12	11	0	0	0	0	0	102	Bacteria{superkingdom}(100);Firmicutes{phylum}(100);Bacilli{class}(100);Lactobacillales{order}(100);Streptococcaceae{family}(100);Streptococcus{genus}(100);Unassigned{species}(0)	Bacteria	Firmicutes	Bacilli	Lactobacillales	Streptococcaceae	Streptococcus	Unassigned
ASV1150	0	0	0	0	0	0	0	0	0	0	0	33	0	0	0	0	0	0	0	0	0	0	0	0	0	0	0	0	0	0	0	70	0	0	0	0	0	0	0	0	103	Bacteria{superkingdom}(100);Firmicutes{phylum}(100);Clostridia{class}(100);Clostridiales{order}(100);Ruminococcaceae{family}(100);Ruminococcus{genus}(100);Unassigned{species}(0)	Bacteria	Firmicutes	Clostridia	Clostridiales	Ruminococcaceae	Ruminococcus	Unassigned
ASV1152	0	0	0	0	0	0	0	0	0	0	0	0	0	0	0	0	0	0	0	0	0	0	0	0	0	0	0	0	0	0	0	0	0	0	0	181	0	0	0	0	181	Bacteria{superkingdom}(86);Firmicutes{phylum}(86);Clostridia{class}(86);Clostridiales{order}(86);Ruminococcaceae{family}(86);Gemmiger{genus}(86);Unassigned{species}(0)	Bacteria	Firmicutes	Clostridia	Clostridiales	Ruminococcaceae	Gemmiger	Unassigned
ASV1153	0	0	0	0	0	0	0	189	0	0	0	0	0	0	0	0	0	0	0	0	0	0	0	0	0	0	0	170	0	0	0	0	0	0	0	0	0	0	0	0	359	Bacteria{superkingdom}(100);Firmicutes{phylum}(100);Clostridia{class}(100);Clostridiales{order}(100);Ruminococcaceae{family}(100);Faecalibacterium{genus}(100);Unassigned{species}(0)	Bacteria	Firmicutes	Clostridia	Clostridiales	Ruminococcaceae	Faecalibacterium	Unassigned
ASV1156	0	0	0	0	0	237	0	0	0	0	0	0	0	0	0	0	0	0	0	0	0	0	0	0	0	32	0	0	0	0	0	0	0	0	0	0	0	0	0	0	269	Bacteria{superkingdom}(99);Firmicutes{phylum}(99);Clostridia{class}(99);Clostridiales{order}(99);Ruminococcaceae{family}(99);{genus}(99);Unassigned{species}(0)	Bacteria	Firmicutes	Clostridia	Clostridiales	Ruminococcaceae		Unassigned
ASV1157	0	0	0	0	0	0	0	0	0	0	0	0	0	0	0	0	0	0	0	0	0	0	0	0	0	0	0	0	0	4	0	0	0	0	0	0	0	0	0	0	4	Bacteria{superkingdom}(98);Firmicutes{phylum}(98);Clostridia{class}(98);Clostridiales{order}(98);Ruminococcaceae{family}(98);Ruminococcus{genus}(98);Ruminococcus_callidus{species}(98)	Bacteria	Firmicutes	Clostridia	Clostridiales	Ruminococcaceae	Ruminococcus	Ruminococcus_callidus
ASV1158	0	0	0	0	0	0	0	0	0	0	0	0	0	0	0	0	14	0	0	0	0	8	0	0	0	0	0	0	0	0	0	0	0	0	0	0	0	6	0	0	28	Bacteria{superkingdom}(100);Firmicutes{phylum}(100);Clostridia{class}(100);Clostridiales{order}(100);Ruminococcaceae{family}(100);{genus}(100);uncultured_bacterium_adhufec108{species}(100)	Bacteria	Firmicutes	Clostridia	Clostridiales	Ruminococcaceae		uncultured_bacterium_adhufec108
ASV1163	0	0	0	0	0	44	0	0	0	0	0	0	0	0	0	0	0	0	0	0	0	0	0	0	0	69	0	0	0	0	0	0	0	0	0	0	0	0	0	0	113	Bacteria{superkingdom}(100);Firmicutes{phylum}(100);Clostridia{class}(100);Clostridiales{order}(100);Lachnospiraceae{family}(100);Blautia{genus}(100);Unassigned{species}(0)	Bacteria	Firmicutes	Clostridia	Clostridiales	Lachnospiraceae	Blautia	Unassigned
ASV1167	0	0	0	0	0	0	0	0	0	0	0	0	0	0	0	0	0	0	0	0	0	0	0	0	0	0	0	0	0	0	0	0	0	282	0	0	0	0	0	0	282	Bacteria{superkingdom}(99);Bacteroidetes{phylum}(99);Bacteroidia{class}(99);Bacteroidales{order}(99);Porphyromonadaceae{family}(99);Coprobacter{genus}(99);uncultured_organism{species}(99)	Bacteria	Bacteroidetes	Bacteroidia	Bacteroidales	Porphyromonadaceae	Coprobacter	uncultured_organism
ASV1169	0	0	0	16	9	5	0	12	2	0	0	0	0	0	0	5	0	0	0	0	0	15	0	0	7	0	0	0	11	4	0	0	0	0	1	0	0	0	0	2	89	Bacteria{superkingdom}(100);Proteobacteria{phylum}(100);Gammaproteobacteria{class}(100);Enterobacteriales{order}(100);Enterobacteriaceae{family}(100);Unassigned{genus}(0);Unassigned{species}(0)	Bacteria	Proteobacteria	Gammaproteobacteria	Enterobacteriales	Enterobacteriaceae	Unassigned	Unassigned
ASV1172	0	12	0	0	31	0	0	0	0	0	0	0	0	0	0	0	0	0	0	33	0	0	0	0	0	0	0	0	0	0	0	0	0	0	0	0	0	0	0	55	131	Bacteria{superkingdom}(100);Firmicutes{phylum}(100);Clostridia{class}(100);Clostridiales{order}(100);Lachnospiraceae{family}(100);Blautia{genus}(100);Unassigned{species}(0)	Bacteria	Firmicutes	Clostridia	Clostridiales	Lachnospiraceae	Blautia	Unassigned
ASV1173	0	0	0	0	0	0	0	0	0	0	1	0	0	0	0	0	0	0	0	0	0	0	0	0	0	0	0	0	0	0	0	0	0	0	0	0	0	0	0	0	1	Bacteria{superkingdom}(100);Firmicutes{phylum}(100);Clostridia{class}(100);Clostridiales{order}(100);Ruminococcaceae{family}(100);Clostridium_IV{genus}(100);uncultured_organism{species}(100)	Bacteria	Firmicutes	Clostridia	Clostridiales	Ruminococcaceae	Clostridium_IV	uncultured_organism
ASV1174	0	0	0	0	0	0	0	0	0	0	0	0	0	0	0	0	0	0	0	0	0	0	0	0	0	0	0	0	0	0	0	0	0	174	0	0	0	0	0	0	174	Bacteria{superkingdom}(100);Bacteroidetes{phylum}(100);Bacteroidia{class}(100);Bacteroidales{order}(100);Prevotellaceae{family}(100);{genus}(100);uncultured_organism{species}(100)	Bacteria	Bacteroidetes	Bacteroidia	Bacteroidales	Prevotellaceae		uncultured_organism
ASV1176	0	0	0	0	0	0	0	0	0	0	0	0	0	128	0	0	0	0	0	0	0	0	0	0	0	0	0	0	0	0	0	0	0	0	199	0	0	0	0	0	327	Bacteria{superkingdom}(100);Firmicutes{phylum}(100);Clostridia{class}(100);Clostridiales{order}(100);Lachnospiraceae{family}(100);Blautia{genus}(100);Unassigned{species}(0)	Bacteria	Firmicutes	Clostridia	Clostridiales	Lachnospiraceae	Blautia	Unassigned
ASV1177	0	0	0	0	0	0	0	0	0	0	0	0	0	0	0	0	0	10	10	0	0	0	0	0	0	0	0	0	0	0	0	10	0	0	0	0	0	0	0	0	30	Bacteria{superkingdom}(96);Firmicutes{phylum}(96);Clostridia{class}(96);Clostridiales{order}(96);Clostridiales_Incertae_Sedis_XIII{family}(96);Anaerovorax{genus}(96);uncultured_bacterium{species}(96)	Bacteria	Firmicutes	Clostridia	Clostridiales	Clostridiales_Incertae_Sedis_XIII	Anaerovorax	uncultured_bacterium
ASV1179	0	0	0	0	0	0	0	0	0	0	0	0	0	0	0	0	0	0	0	0	0	0	0	0	0	0	0	53	0	0	28	0	0	0	0	0	0	0	0	0	81	Bacteria{superkingdom}(100);Bacteroidetes{phylum}(100);Bacteroidia{class}(100);Bacteroidales{order}(100);Porphyromonadaceae{family}(100);Butyricimonas{genus}(100);Unassigned{species}(0)	Bacteria	Bacteroidetes	Bacteroidia	Bacteroidales	Porphyromonadaceae	Butyricimonas	Unassigned
ASV1182	0	0	0	0	0	0	0	0	0	0	0	0	0	75	0	0	0	0	0	0	0	0	0	0	5	0	0	0	0	0	0	0	0	0	33	0	0	0	0	0	113	Bacteria{superkingdom}(96);Proteobacteria{phylum}(96);Gammaproteobacteria{class}(96);Enterobacteriales{order}(96);Enterobacteriaceae{family}(96);Raoultella{genus}(96);Unassigned{species}(0)	Bacteria	Proteobacteria	Gammaproteobacteria	Enterobacteriales	Enterobacteriaceae	Raoultella	Unassigned
ASV1183	0	0	0	0	0	0	0	0	0	0	0	0	0	0	0	0	0	0	0	0	0	16	0	0	0	0	0	0	0	0	0	0	0	0	0	0	0	0	0	0	16	Bacteria{superkingdom}(100);Bacteroidetes{phylum}(100);Bacteroidia{class}(100);Bacteroidales{order}(100);Porphyromonadaceae{family}(100);Parabacteroides{genus}(100);Unassigned{species}(0)	Bacteria	Bacteroidetes	Bacteroidia	Bacteroidales	Porphyromonadaceae	Parabacteroides	Unassigned
ASV1187	0	0	0	0	0	0	0	0	0	0	0	0	0	0	0	0	0	0	0	0	0	0	0	0	0	24	0	0	0	0	0	0	0	0	0	0	0	0	0	0	24	Bacteria{superkingdom}(100);Firmicutes{phylum}(100);Clostridia{class}(100);Clostridiales{order}(100);Lachnospiraceae{family}(100);Eisenbergiella{genus}(100);Unassigned{species}(0)	Bacteria	Firmicutes	Clostridia	Clostridiales	Lachnospiraceae	Eisenbergiella	Unassigned
ASV1189	0	0	0	0	0	0	0	0	0	0	0	75	0	20	0	0	0	0	0	0	0	0	0	0	0	0	0	0	8	6	0	0	62	0	0	0	0	0	0	0	171	Bacteria{superkingdom}(100);Firmicutes{phylum}(100);Clostridia{class}(100);Clostridiales{order}(100);Lachnospiraceae{family}(100);Clostridium_XlVb{genus}(100);Unassigned{species}(0)	Bacteria	Firmicutes	Clostridia	Clostridiales	Lachnospiraceae	Clostridium_XlVb	Unassigned
ASV1193	0	0	0	0	0	0	0	0	0	0	0	0	0	0	0	0	0	0	13	0	0	9	0	0	0	0	0	0	0	0	0	0	0	0	0	0	0	0	0	0	22	Bacteria{superkingdom}(100);Bacteroidetes{phylum}(100);Bacteroidia{class}(100);Bacteroidales{order}(100);Porphyromonadaceae{family}(100);Butyricimonas{genus}(100);Unassigned{species}(0)	Bacteria	Bacteroidetes	Bacteroidia	Bacteroidales	Porphyromonadaceae	Butyricimonas	Unassigned
ASV1194	0	46	0	0	0	0	0	0	0	0	0	0	0	0	0	0	0	0	0	0	76	0	0	0	0	0	0	0	0	0	0	0	0	0	0	0	0	0	0	0	122	Bacteria{superkingdom}(100);Proteobacteria{phylum}(100);Deltaproteobacteria{class}(100);Desulfovibrionales{order}(100);Desulfovibrionaceae{family}(100);Desulfovibrio{genus}(100);Unassigned{species}(0)	Bacteria	Proteobacteria	Deltaproteobacteria	Desulfovibrionales	Desulfovibrionaceae	Desulfovibrio	Unassigned
ASV1195	0	0	0	0	0	0	0	0	0	0	0	0	0	0	0	0	0	0	0	0	0	0	0	43	0	0	0	0	0	0	0	0	0	0	0	0	0	0	0	0	43	Bacteria{superkingdom}(100);Firmicutes{phylum}(100);Clostridia{class}(100);Clostridiales{order}(100);Peptostreptococcaceae{family}(100);Romboutsia{genus}(100);Unassigned{species}(0)	Bacteria	Firmicutes	Clostridia	Clostridiales	Peptostreptococcaceae	Romboutsia	Unassigned
ASV1199	0	0	0	0	0	0	0	0	0	0	0	5	0	0	0	0	0	0	6	0	0	0	0	0	0	0	0	12	0	0	0	0	0	18	0	0	0	0	0	0	41	Bacteria{superkingdom}(99);Proteobacteria{phylum}(99);Betaproteobacteria{class}(99);Burkholderiales{order}(99);Sutterellaceae{family}(99);Sutterella{genus}(99);Sutterella_wadsworthensis{species}(99)	Bacteria	Proteobacteria	Betaproteobacteria	Burkholderiales	Sutterellaceae	Sutterella	Sutterella_wadsworthensis
ASV1201	0	0	0	0	0	0	0	0	0	0	0	0	0	0	0	0	0	0	0	0	0	0	0	0	0	0	0	0	0	0	0	0	0	0	0	0	0	11	0	0	11	Bacteria{superkingdom}(100);Firmicutes{phylum}(100);Negativicutes{class}(100);Selenomonadales{order}(100);Veillonellaceae{family}(100);Veillonella{genus}(100);Unassigned{species}(0)	Bacteria	Firmicutes	Negativicutes	Selenomonadales	Veillonellaceae	Veillonella	Unassigned
ASV1202	0	0	0	0	0	0	0	0	0	0	0	0	0	0	0	0	0	0	32	0	0	0	0	0	0	0	0	0	0	0	0	0	0	0	0	0	0	0	0	0	32	Bacteria{superkingdom}(99);Firmicutes{phylum}(99);Clostridia{class}(99);Clostridiales{order}(99);Ruminococcaceae{family}(99);{genus}(99);Unassigned{species}(0)	Bacteria	Firmicutes	Clostridia	Clostridiales	Ruminococcaceae		Unassigned
ASV1204	0	0	0	0	0	0	0	0	0	0	163	0	0	0	0	0	0	0	0	0	0	0	0	0	0	0	0	0	0	0	0	0	0	0	0	0	0	0	0	0	163	Bacteria{superkingdom}(100);Proteobacteria{phylum}(100);Gammaproteobacteria{class}(100);Enterobacteriales{order}(100);Enterobacteriaceae{family}(100);Escherichia/Shigella{genus}(100);Unassigned{species}(0)	Bacteria	Proteobacteria	Gammaproteobacteria	Enterobacteriales	Enterobacteriaceae	Escherichia/Shigella	Unassigned
ASV1205	0	0	0	0	0	0	0	0	0	0	0	0	69	0	0	0	0	0	0	0	0	0	0	0	0	0	0	0	0	0	0	0	0	0	0	0	0	0	0	0	69	Bacteria{superkingdom}(100);Firmicutes{phylum}(100);Clostridia{class}(100);Clostridiales{order}(100);Lachnospiraceae{family}(100);Fusicatenibacter{genus}(100);Unassigned{species}(0)	Bacteria	Firmicutes	Clostridia	Clostridiales	Lachnospiraceae	Fusicatenibacter	Unassigned
ASV1208	0	0	0	91	0	0	0	0	0	0	0	0	0	0	0	0	0	0	0	0	0	0	0	219	0	0	0	0	0	0	0	0	0	0	0	0	0	0	0	0	310	Bacteria{superkingdom}(100);Firmicutes{phylum}(100);Clostridia{class}(100);Clostridiales{order}(100);Ruminococcaceae{family}(100);Faecalibacterium{genus}(100);Unassigned{species}(0)	Bacteria	Firmicutes	Clostridia	Clostridiales	Ruminococcaceae	Faecalibacterium	Unassigned
ASV1210	0	0	0	0	0	0	0	0	0	0	0	0	0	0	0	0	0	0	0	0	0	85	0	0	0	0	0	0	0	0	0	0	0	0	0	0	0	0	0	0	85	Bacteria{superkingdom}(100);Bacteroidetes{phylum}(100);Bacteroidia{class}(100);Bacteroidales{order}(100);Porphyromonadaceae{family}(100);{genus}(100);Unassigned{species}(0)	Bacteria	Bacteroidetes	Bacteroidia	Bacteroidales	Porphyromonadaceae		Unassigned
ASV1212	0	0	0	0	0	0	0	0	0	0	0	0	0	0	0	0	10	0	0	0	0	0	0	0	0	0	0	0	0	0	0	0	0	0	0	0	0	101	0	0	111	Bacteria{superkingdom}(92);Bacteroidetes{phylum}(92);Bacteroidia{class}(92);Bacteroidales{order}(92);Bacteroidaceae{family}(92);Bacteroides{genus}(92);Bacteroides_stercoris{species}(92)	Bacteria	Bacteroidetes	Bacteroidia	Bacteroidales	Bacteroidaceae	Bacteroides	Bacteroides_stercoris
ASV1213	0	0	0	0	6	0	0	0	3	0	0	0	0	32	0	0	7	0	0	0	0	0	0	0	8	0	0	0	0	0	0	0	0	0	8	0	0	0	0	0	64	Bacteria{superkingdom}(100);Proteobacteria{phylum}(100);Gammaproteobacteria{class}(100);Enterobacteriales{order}(100);Enterobacteriaceae{family}(100);Unassigned{genus}(0);Unassigned{species}(0)	Bacteria	Proteobacteria	Gammaproteobacteria	Enterobacteriales	Enterobacteriaceae	Unassigned	Unassigned
ASV1216	0	0	0	0	0	0	0	0	0	0	0	0	0	0	0	0	0	0	314	0	0	0	0	0	0	0	0	0	0	0	0	0	0	0	0	0	0	0	0	0	314	Bacteria{superkingdom}(100);Firmicutes{phylum}(100);Erysipelotrichia{class}(100);Erysipelotrichales{order}(100);Erysipelotrichaceae{family}(100);Holdemanella{genus}(100);Unassigned{species}(0)	Bacteria	Firmicutes	Erysipelotrichia	Erysipelotrichales	Erysipelotrichaceae	Holdemanella	Unassigned
ASV1217	0	0	0	0	0	0	0	0	0	0	0	0	0	0	7	0	0	0	0	0	0	0	0	0	0	0	0	0	0	0	0	0	0	0	0	0	0	0	0	0	7	Bacteria{superkingdom}(87);Firmicutes{phylum}(87);Clostridia{class}(87);Clostridiales{order}(87);Lachnospiraceae{family}(87);{genus}(87);Unassigned{species}(0)	Bacteria	Firmicutes	Clostridia	Clostridiales	Lachnospiraceae		Unassigned
ASV1218	0	0	0	0	0	0	0	0	0	0	0	0	0	0	0	0	0	0	22	0	0	0	0	0	0	0	0	0	0	0	0	0	0	0	0	0	0	0	0	0	22	Bacteria{superkingdom}(99);Firmicutes{phylum}(99);Clostridia{class}(99);Clostridiales{order}(99);Ruminococcaceae{family}(99);Clostridium_IV{genus}(99);Unassigned{species}(0)	Bacteria	Firmicutes	Clostridia	Clostridiales	Ruminococcaceae	Clostridium_IV	Unassigned
ASV1219	0	0	0	0	0	0	50	0	6	0	0	0	0	0	0	0	0	0	104	0	0	0	0	0	0	0	7	0	0	0	0	0	0	0	0	0	0	0	0	0	167	Bacteria{superkingdom}(100);Firmicutes{phylum}(100);Clostridia{class}(100);Clostridiales{order}(100);Ruminococcaceae{family}(100);Butyricicoccus{genus}(100);Unassigned{species}(0)	Bacteria	Firmicutes	Clostridia	Clostridiales	Ruminococcaceae	Butyricicoccus	Unassigned
ASV1222	0	42	0	0	0	0	0	0	0	0	0	0	0	0	0	0	0	0	0	0	45	0	0	0	0	0	0	0	0	0	0	0	0	0	0	0	0	0	0	0	87	Bacteria{superkingdom}(99);Firmicutes{phylum}(99);Clostridia{class}(99);Clostridiales{order}(99);Ruminococcaceae{family}(99);{genus}(99);Unassigned{species}(0)	Bacteria	Firmicutes	Clostridia	Clostridiales	Ruminococcaceae		Unassigned
ASV1224	0	0	0	0	0	0	0	0	0	0	0	0	0	0	0	0	0	0	0	0	0	28	0	0	0	0	0	0	0	0	0	0	0	0	0	0	0	0	0	0	28	Bacteria{superkingdom}(93);Bacteroidetes{phylum}(93);Bacteroidia{class}(93);Bacteroidales{order}(93);Prevotellaceae{family}(93);Prevotella{genus}(93);Prevotellaceae_bacterium_DJF_VR15{species}(93)	Bacteria	Bacteroidetes	Bacteroidia	Bacteroidales	Prevotellaceae	Prevotella	Prevotellaceae_bacterium_DJF_VR15
ASV1225	0	0	0	0	0	0	0	0	0	0	0	0	0	0	0	0	0	0	0	0	0	62	0	0	0	0	0	0	0	0	0	0	0	0	0	0	0	0	0	0	62	Bacteria{superkingdom}(100);Firmicutes{phylum}(100);Clostridia{class}(100);Clostridiales{order}(100);Lachnospiraceae{family}(100);Roseburia{genus}(100);Unassigned{species}(0)	Bacteria	Firmicutes	Clostridia	Clostridiales	Lachnospiraceae	Roseburia	Unassigned
ASV1229	0	0	0	0	0	0	0	0	0	0	0	0	0	0	0	0	0	0	0	0	0	0	0	0	0	0	0	0	0	0	0	0	0	21	0	0	0	0	0	0	21	Bacteria{superkingdom}(98);Bacteroidetes{phylum}(98);Bacteroidia{class}(98);Bacteroidales{order}(98);Porphyromonadaceae{family}(98);Parabacteroides{genus}(98);uncultured_Bacteroidetes_bacterium{species}(98)	Bacteria	Bacteroidetes	Bacteroidia	Bacteroidales	Porphyromonadaceae	Parabacteroides	uncultured_Bacteroidetes_bacterium
ASV1231	5	0	0	0	0	0	0	0	0	0	0	0	0	0	0	0	0	0	0	0	0	0	0	0	0	0	0	0	0	0	0	0	0	0	0	0	0	0	0	0	5	Bacteria{superkingdom}(95);Bacteroidetes{phylum}(95);Bacteroidia{class}(95);Bacteroidales{order}(95);Bacteroidaceae{family}(95);Bacteroides{genus}(95);Bacteroides_ovatus{species}(95)	Bacteria	Bacteroidetes	Bacteroidia	Bacteroidales	Bacteroidaceae	Bacteroides	Bacteroides_ovatus
ASV1233	0	2	0	0	0	0	0	0	0	0	0	3	0	5	0	0	0	0	0	0	12	0	0	0	2	3	0	24	3	10	0	6	0	0	5	0	0	0	0	0	75	Bacteria{superkingdom}(86);Firmicutes{phylum}(86);Clostridia{class}(86);Clostridiales{order}(86);Ruminococcaceae{family}(86);Anaerotruncus{genus}(86);uncultured_organism{species}(86)	Bacteria	Firmicutes	Clostridia	Clostridiales	Ruminococcaceae	Anaerotruncus	uncultured_organism
ASV1234	0	0	0	0	0	0	0	0	0	0	0	0	0	176	0	0	0	0	0	0	0	0	0	0	0	0	0	0	0	0	0	0	0	0	146	0	0	0	0	0	322	Bacteria{superkingdom}(99);Firmicutes{phylum}(99);Clostridia{class}(99);Clostridiales{order}(99);Lachnospiraceae{family}(99);{genus}(99);bacterium_P1C11{species}(99)	Bacteria	Firmicutes	Clostridia	Clostridiales	Lachnospiraceae		bacterium_P1C11
ASV1237	0	0	0	0	0	0	0	0	0	0	0	0	0	0	0	0	4	0	0	0	0	0	0	0	0	0	0	0	0	0	0	0	0	0	0	0	0	16	0	0	20	Bacteria{superkingdom}(100);Bacteroidetes{phylum}(100);Bacteroidia{class}(100);Bacteroidales{order}(100);Prevotellaceae{family}(100);Prevotella{genus}(100);Unassigned{species}(0)	Bacteria	Bacteroidetes	Bacteroidia	Bacteroidales	Prevotellaceae	Prevotella	Unassigned
ASV1238	0	0	0	0	0	0	0	0	0	0	0	0	0	0	0	0	0	0	0	0	0	27	0	0	0	0	0	0	0	0	0	0	52	0	0	0	0	0	0	0	79	Bacteria{superkingdom}(87);Firmicutes{phylum}(87);Clostridia{class}(87);Clostridiales{order}(87);Ruminococcaceae{family}(87);{genus}(87);Unassigned{species}(0)	Bacteria	Firmicutes	Clostridia	Clostridiales	Ruminococcaceae		Unassigned
ASV1240	0	25	0	0	19	0	0	0	12	0	34	0	0	0	0	0	0	0	0	0	93	0	0	0	0	0	0	0	0	0	0	0	0	0	0	0	0	0	0	0	183	Bacteria{superkingdom}(100);Firmicutes{phylum}(100);Bacilli{class}(100);Lactobacillales{order}(100);Streptococcaceae{family}(100);Streptococcus{genus}(100);Unassigned{species}(0)	Bacteria	Firmicutes	Bacilli	Lactobacillales	Streptococcaceae	Streptococcus	Unassigned
ASV1241	0	0	0	0	0	0	0	0	0	0	0	0	0	0	0	0	0	0	0	0	0	12	0	0	0	0	0	0	0	0	0	0	0	0	0	0	0	0	0	0	12	Bacteria{superkingdom}(100);Bacteroidetes{phylum}(100);Bacteroidia{class}(100);Bacteroidales{order}(100);Porphyromonadaceae{family}(100);Parabacteroides{genus}(100);Unassigned{species}(0)	Bacteria	Bacteroidetes	Bacteroidia	Bacteroidales	Porphyromonadaceae	Parabacteroides	Unassigned
ASV1242	0	0	0	0	0	0	0	0	0	0	0	24	0	0	0	0	0	0	0	0	0	0	0	0	0	0	0	0	0	0	0	0	0	0	0	0	0	0	0	0	24	Bacteria{superkingdom}(88);Actinobacteria{phylum}(88);Actinobacteria{class}(88);Coriobacteriales{order}(88);Coriobacteriaceae{family}(88);Adlercreutzia{genus}(88);Unassigned{species}(0)	Bacteria	Actinobacteria	Actinobacteria	Coriobacteriales	Coriobacteriaceae	Adlercreutzia	Unassigned
ASV1243	0	0	0	0	0	0	0	0	0	0	0	26	0	0	0	0	0	0	0	0	0	0	0	0	0	0	0	0	0	0	59	27	0	0	0	0	59	16	0	0	187	Bacteria{superkingdom}(100);Bacteroidetes{phylum}(100);Bacteroidia{class}(100);Bacteroidales{order}(100);Porphyromonadaceae{family}(100);Butyricimonas{genus}(100);Unassigned{species}(0)	Bacteria	Bacteroidetes	Bacteroidia	Bacteroidales	Porphyromonadaceae	Butyricimonas	Unassigned
ASV1245	0	0	0	0	0	0	0	0	0	0	0	0	0	0	0	0	0	0	0	6	0	0	0	0	0	0	0	0	0	0	0	0	0	0	0	0	0	0	0	0	6	Bacteria{superkingdom}(98);Firmicutes{phylum}(98);Clostridia{class}(98);Clostridiales{order}(98);Lachnospiraceae{family}(98);Clostridium_XlVa{genus}(98);Unassigned{species}(0)	Bacteria	Firmicutes	Clostridia	Clostridiales	Lachnospiraceae	Clostridium_XlVa	Unassigned
ASV1246	0	26	0	0	0	0	0	0	0	0	0	0	0	0	0	0	0	0	0	0	91	0	0	0	0	0	0	0	0	0	0	0	0	0	0	0	0	0	0	0	117	Bacteria{superkingdom}(100);Bacteroidetes{phylum}(100);Bacteroidia{class}(100);Bacteroidales{order}(100);Rikenellaceae{family}(100);Alistipes{genus}(100);Unassigned{species}(0)	Bacteria	Bacteroidetes	Bacteroidia	Bacteroidales	Rikenellaceae	Alistipes	Unassigned
ASV1247	0	0	0	1	0	0	0	0	187	0	0	0	0	0	0	0	0	0	0	0	0	0	0	0	0	0	0	0	51	0	0	0	0	0	0	0	0	0	0	0	239	Bacteria{superkingdom}(100);Proteobacteria{phylum}(100);Gammaproteobacteria{class}(100);Pasteurellales{order}(100);Pasteurellaceae{family}(100);Haemophilus{genus}(100);Unassigned{species}(0)	Bacteria	Proteobacteria	Gammaproteobacteria	Pasteurellales	Pasteurellaceae	Haemophilus	Unassigned
ASV1248	0	0	0	0	0	0	0	0	0	193	0	0	0	0	0	0	0	0	0	0	0	0	0	0	0	0	0	0	0	58	0	0	0	0	0	0	0	0	0	0	251	Bacteria{superkingdom}(100);Firmicutes{phylum}(100);Clostridia{class}(100);Clostridiales{order}(100);Ruminococcaceae{family}(100);Unassigned{genus}(0);Unassigned{species}(0)	Bacteria	Firmicutes	Clostridia	Clostridiales	Ruminococcaceae	Unassigned	Unassigned
ASV1249	0	0	0	0	0	0	0	0	0	0	0	0	0	0	0	0	0	0	0	0	0	0	0	0	0	0	0	0	0	0	0	0	0	0	0	0	0	0	196	0	196	Bacteria{superkingdom}(100);Firmicutes{phylum}(100);Clostridia{class}(100);Clostridiales{order}(100);Ruminococcaceae{family}(100);Clostridium_IV{genus}(100);Unassigned{species}(0)	Bacteria	Firmicutes	Clostridia	Clostridiales	Ruminococcaceae	Clostridium_IV	Unassigned
ASV1252	0	0	0	0	0	0	0	0	0	0	0	0	0	0	0	0	0	0	0	0	0	170	0	0	0	0	0	0	0	0	0	0	0	0	0	0	0	0	0	0	170	Bacteria{superkingdom}(100);Firmicutes{phylum}(100);Clostridia{class}(100);Clostridiales{order}(100);Lachnospiraceae{family}(100);Roseburia{genus}(100);Unassigned{species}(0)	Bacteria	Firmicutes	Clostridia	Clostridiales	Lachnospiraceae	Roseburia	Unassigned
ASV1253	0	0	0	0	0	0	0	0	0	0	0	0	0	0	0	0	0	0	0	0	0	22	0	0	0	0	0	0	0	0	0	0	0	0	0	17	0	0	0	0	39	Bacteria{superkingdom}(100);Firmicutes{phylum}(100);Clostridia{class}(100);Clostridiales{order}(100);Ruminococcaceae{family}(100);Unassigned{genus}(0);Unassigned{species}(0)	Bacteria	Firmicutes	Clostridia	Clostridiales	Ruminococcaceae	Unassigned	Unassigned
ASV1256	0	50	0	0	0	0	0	0	38	0	0	0	0	90	0	0	0	0	0	0	0	0	0	0	0	0	0	0	0	0	0	0	0	0	117	0	0	0	0	0	295	Bacteria{superkingdom}(100);Firmicutes{phylum}(100);Clostridia{class}(100);Clostridiales{order}(100);Ruminococcaceae{family}(100);Butyricicoccus{genus}(100);Unassigned{species}(0)	Bacteria	Firmicutes	Clostridia	Clostridiales	Ruminococcaceae	Butyricicoccus	Unassigned
ASV1259	0	0	18	0	0	0	0	0	0	0	0	0	0	0	0	0	0	0	0	0	0	0	0	0	0	0	0	0	0	0	0	0	0	0	0	0	0	0	0	0	18	Bacteria{superkingdom}(94);Proteobacteria{phylum}(94);Gammaproteobacteria{class}(94);Enterobacteriales{order}(94);Enterobacteriaceae{family}(94);Klebsiella{genus}(94);Unassigned{species}(0)	Bacteria	Proteobacteria	Gammaproteobacteria	Enterobacteriales	Enterobacteriaceae	Klebsiella	Unassigned
ASV1262	0	0	0	0	0	0	0	0	0	0	0	0	0	0	0	0	0	0	0	0	0	0	0	0	0	0	2	22	0	0	0	0	0	0	0	0	0	0	0	0	24	Bacteria{superkingdom}(100);Bacteroidetes{phylum}(100);Bacteroidia{class}(100);Bacteroidales{order}(100);Porphyromonadaceae{family}(100);Parabacteroides{genus}(100);Unassigned{species}(0)	Bacteria	Bacteroidetes	Bacteroidia	Bacteroidales	Porphyromonadaceae	Parabacteroides	Unassigned
ASV1266	0	0	0	0	0	0	0	0	0	0	0	0	0	0	0	0	0	0	0	0	0	16	0	0	0	0	0	0	0	0	0	0	0	0	0	0	0	0	0	0	16	Bacteria{superkingdom}(99);Firmicutes{phylum}(99);Clostridia{class}(99);Clostridiales{order}(99);Lachnospiraceae{family}(99);Roseburia{genus}(99);Unassigned{species}(0)	Bacteria	Firmicutes	Clostridia	Clostridiales	Lachnospiraceae	Roseburia	Unassigned
ASV1269	0	41	0	0	0	0	0	0	0	0	30	0	0	0	0	0	0	0	0	0	38	0	0	0	0	0	0	0	0	0	0	0	0	0	0	0	0	0	0	0	109	Bacteria{superkingdom}(100);Firmicutes{phylum}(100);Clostridia{class}(100);Clostridiales{order}(100);Lachnospiraceae{family}(100);Blautia{genus}(100);Unassigned{species}(0)	Bacteria	Firmicutes	Clostridia	Clostridiales	Lachnospiraceae	Blautia	Unassigned
ASV1272	0	0	0	0	0	0	0	0	0	0	0	0	0	0	0	0	0	0	0	0	0	0	0	0	0	0	0	0	0	0	0	0	0	90	0	33	0	0	0	0	123	Bacteria{superkingdom}(86);Bacteroidetes{phylum}(86);Bacteroidia{class}(86);Bacteroidales{order}(86);Porphyromonadaceae{family}(86);Barnesiella{genus}(86);uncultured_organism{species}(86)	Bacteria	Bacteroidetes	Bacteroidia	Bacteroidales	Porphyromonadaceae	Barnesiella	uncultured_organism
ASV1276	0	0	0	0	0	0	0	0	0	22	0	0	0	0	0	0	0	0	0	0	0	0	0	0	0	0	0	0	0	0	0	0	0	0	0	0	0	0	0	0	22	Bacteria{superkingdom}(100);Firmicutes{phylum}(100);Negativicutes{class}(100);Selenomonadales{order}(100);Veillonellaceae{family}(100);Veillonella{genus}(100);Unassigned{species}(0)	Bacteria	Firmicutes	Negativicutes	Selenomonadales	Veillonellaceae	Veillonella	Unassigned
ASV1278	0	0	0	0	0	0	0	0	0	0	0	0	0	0	0	0	0	120	0	0	0	0	0	0	0	0	0	0	0	0	0	0	0	0	0	0	0	0	0	27	147	Bacteria{superkingdom}(100);Firmicutes{phylum}(100);Clostridia{class}(100);Clostridiales{order}(100);Lachnospiraceae{family}(100);Unassigned{genus}(0);Unassigned{species}(0)	Bacteria	Firmicutes	Clostridia	Clostridiales	Lachnospiraceae	Unassigned	Unassigned
ASV1279	0	0	0	0	0	0	0	0	0	0	0	0	0	0	0	0	0	0	284	0	0	0	0	0	0	0	0	0	0	0	0	0	0	0	0	0	0	0	0	0	284	Bacteria{superkingdom}(100);Firmicutes{phylum}(100);Clostridia{class}(100);Clostridiales{order}(100);Ruminococcaceae{family}(100);Clostridium_IV{genus}(100);Unassigned{species}(0)	Bacteria	Firmicutes	Clostridia	Clostridiales	Ruminococcaceae	Clostridium_IV	Unassigned
ASV1280	0	0	0	0	0	0	0	0	0	0	0	0	0	0	0	0	0	0	0	0	0	0	0	0	0	0	0	82	0	0	0	0	0	0	0	0	0	0	0	0	82	Bacteria{superkingdom}(100);Bacteroidetes{phylum}(100);Bacteroidia{class}(100);Bacteroidales{order}(100);Porphyromonadaceae{family}(100);Butyricimonas{genus}(100);Unassigned{species}(0)	Bacteria	Bacteroidetes	Bacteroidia	Bacteroidales	Porphyromonadaceae	Butyricimonas	Unassigned
ASV1282	0	0	0	0	0	0	0	0	0	0	0	0	0	0	0	0	0	0	292	0	0	0	0	0	0	0	0	0	0	0	0	0	0	0	0	0	0	0	0	0	292	Bacteria{superkingdom}(95);Firmicutes{phylum}(95);Negativicutes{class}(95);Selenomonadales{order}(95);Veillonellaceae{family}(95);Dialister{genus}(95);Unassigned{species}(0)	Bacteria	Firmicutes	Negativicutes	Selenomonadales	Veillonellaceae	Dialister	Unassigned
ASV1283	0	0	0	0	0	0	0	0	0	0	0	0	0	0	0	0	0	0	0	0	0	0	0	0	0	0	0	0	0	0	0	0	0	52	0	0	0	0	0	0	52	Bacteria{superkingdom}(100);Bacteroidetes{phylum}(100);Bacteroidia{class}(100);Bacteroidales{order}(100);Bacteroidaceae{family}(100);Bacteroides{genus}(100);Unassigned{species}(0)	Bacteria	Bacteroidetes	Bacteroidia	Bacteroidales	Bacteroidaceae	Bacteroides	Unassigned
ASV1284	0	197	0	0	0	0	0	0	0	0	0	0	0	0	0	0	0	0	0	0	62	0	0	0	0	0	0	0	0	0	0	0	0	0	0	0	0	0	0	0	259	Bacteria{superkingdom}(96);Bacteroidetes{phylum}(96);Bacteroidia{class}(96);Bacteroidales{order}(96);Bacteroidaceae{family}(96);Bacteroides{genus}(96);Bacteroides_massiliensis{species}(96)	Bacteria	Bacteroidetes	Bacteroidia	Bacteroidales	Bacteroidaceae	Bacteroides	Bacteroides_massiliensis
ASV1288	0	0	0	0	0	0	28	0	0	0	0	0	0	0	0	0	0	0	0	0	0	0	0	0	0	0	80	0	0	83	0	0	0	38	0	0	0	0	0	0	229	Bacteria{superkingdom}(99);Firmicutes{phylum}(99);Erysipelotrichia{class}(99);Erysipelotrichales{order}(99);Erysipelotrichaceae{family}(99);Clostridium_XVIII{genus}(99);Unassigned{species}(0)	Bacteria	Firmicutes	Erysipelotrichia	Erysipelotrichales	Erysipelotrichaceae	Clostridium_XVIII	Unassigned
ASV1289	0	0	0	0	0	0	0	0	11	0	0	0	0	0	0	23	0	0	0	0	0	0	6	0	0	0	0	0	0	0	0	0	0	0	0	0	0	0	16	0	56	Bacteria{superkingdom}(100);Firmicutes{phylum}(100);Negativicutes{class}(100);Selenomonadales{order}(100);Veillonellaceae{family}(100);Veillonella{genus}(100);Unassigned{species}(0)	Bacteria	Firmicutes	Negativicutes	Selenomonadales	Veillonellaceae	Veillonella	Unassigned
ASV1290	0	0	0	0	179	0	0	0	0	0	0	0	0	0	0	0	0	0	0	0	0	0	0	0	16	0	0	0	0	0	0	0	0	0	0	0	0	0	0	0	195	Bacteria{superkingdom}(100);Proteobacteria{phylum}(100);Gammaproteobacteria{class}(100);Enterobacteriales{order}(100);Enterobacteriaceae{family}(100);Escherichia/Shigella{genus}(100);Unassigned{species}(0)	Bacteria	Proteobacteria	Gammaproteobacteria	Enterobacteriales	Enterobacteriaceae	Escherichia/Shigella	Unassigned
ASV1291	0	0	0	0	0	0	0	0	67	0	0	0	0	0	0	0	0	0	0	0	0	0	0	0	0	0	0	0	180	0	0	0	0	0	0	0	0	0	0	0	247	Bacteria{superkingdom}(100);Firmicutes{phylum}(100);Clostridia{class}(100);Clostridiales{order}(100);Ruminococcaceae{family}(100);Faecalibacterium{genus}(100);Unassigned{species}(0)	Bacteria	Firmicutes	Clostridia	Clostridiales	Ruminococcaceae	Faecalibacterium	Unassigned
ASV1292	0	0	0	0	0	0	0	0	0	0	0	0	0	0	0	0	0	0	0	0	0	0	0	0	0	0	0	0	0	0	0	0	0	0	0	134	0	0	0	0	134	Bacteria{superkingdom}(100);Firmicutes{phylum}(100);Clostridia{class}(100);Clostridiales{order}(100);Lachnospiraceae{family}(100);Blautia{genus}(100);Unassigned{species}(0)	Bacteria	Firmicutes	Clostridia	Clostridiales	Lachnospiraceae	Blautia	Unassigned
ASV1293	0	44	0	0	0	0	0	0	0	83	0	0	0	0	0	0	0	0	0	0	80	0	0	0	0	0	0	0	0	28	0	0	0	0	0	0	0	0	0	0	235	Bacteria{superkingdom}(99);Firmicutes{phylum}(99);Clostridia{class}(99);Clostridiales{order}(99);Lachnospiraceae{family}(99);Coprococcus{genus}(99);Unassigned{species}(0)	Bacteria	Firmicutes	Clostridia	Clostridiales	Lachnospiraceae	Coprococcus	Unassigned
ASV1296	0	0	0	0	0	0	0	0	0	0	0	0	0	0	0	0	0	0	0	0	0	3	0	0	0	0	0	0	0	0	0	0	0	0	3	0	0	4	0	0	10	Bacteria{superkingdom}(99);Firmicutes{phylum}(99);Clostridia{class}(99);Clostridiales{order}(99);Ruminococcaceae{family}(99);{genus}(99);Unassigned{species}(0)	Bacteria	Firmicutes	Clostridia	Clostridiales	Ruminococcaceae		Unassigned
ASV1298	0	0	0	0	0	0	0	0	0	0	0	0	0	0	0	0	0	20	0	0	0	0	0	0	0	0	0	0	0	0	0	0	0	0	0	0	0	0	0	0	20	Bacteria{superkingdom}(100);Firmicutes{phylum}(100);Clostridia{class}(100);Clostridiales{order}(100);Ruminococcaceae{family}(100);Butyricicoccus{genus}(100);Unassigned{species}(0)	Bacteria	Firmicutes	Clostridia	Clostridiales	Ruminococcaceae	Butyricicoccus	Unassigned
ASV1299	0	0	0	57	0	0	0	0	0	0	0	0	0	0	0	0	0	0	0	0	0	0	0	43	0	0	0	0	0	0	0	0	0	0	0	0	0	0	31	0	131	Bacteria{superkingdom}(100);Firmicutes{phylum}(100);Clostridia{class}(100);Clostridiales{order}(100);Peptostreptococcaceae{family}(100);Romboutsia{genus}(100);Unassigned{species}(0)	Bacteria	Firmicutes	Clostridia	Clostridiales	Peptostreptococcaceae	Romboutsia	Unassigned
ASV1304	0	0	0	0	0	0	0	0	0	0	0	0	0	0	0	0	0	0	0	0	0	0	0	0	0	0	0	0	0	0	0	0	37	0	0	0	0	0	0	0	37	Bacteria{superkingdom}(95);Firmicutes{phylum}(95);Clostridia{class}(95);Clostridiales{order}(95);Clostridiales_Incertae_Sedis_XIII{family}(95);Anaerovorax{genus}(95);uncultured_bacterium{species}(95)	Bacteria	Firmicutes	Clostridia	Clostridiales	Clostridiales_Incertae_Sedis_XIII	Anaerovorax	uncultured_bacterium
ASV1307	0	94	0	0	0	0	0	0	0	0	0	0	0	0	0	0	0	0	0	0	158	0	0	0	0	0	0	0	0	0	0	0	0	0	0	0	0	0	0	0	252	Bacteria{superkingdom}(87);Firmicutes{phylum}(87);Clostridia{class}(87);Clostridiales{order}(87);Lachnospiraceae{family}(87);Clostridium_XlVb{genus}(87);uncultured_organism{species}(87)	Bacteria	Firmicutes	Clostridia	Clostridiales	Lachnospiraceae	Clostridium_XlVb	uncultured_organism
ASV1309	0	0	0	0	0	0	0	0	0	0	67	0	0	0	0	0	0	0	0	0	0	0	0	0	0	0	0	0	0	0	19	0	0	39	0	0	0	0	0	0	125	Bacteria{superkingdom}(91);Firmicutes{phylum}(91);Erysipelotrichia{class}(91);Erysipelotrichales{order}(91);Erysipelotrichaceae{family}(91);Faecalicoccus{genus}(91);Faecalicoccus_pleomorphus{species}(91)	Bacteria	Firmicutes	Erysipelotrichia	Erysipelotrichales	Erysipelotrichaceae	Faecalicoccus	Faecalicoccus_pleomorphus
ASV1311	0	0	0	0	0	0	0	0	0	0	0	0	0	0	0	0	0	0	0	0	0	0	0	0	0	0	0	0	0	0	0	0	0	0	59	0	0	0	0	0	59	Bacteria{superkingdom}(92);Proteobacteria{phylum}(92);Betaproteobacteria{class}(92);Burkholderiales{order}(92);Oxalobacteraceae{family}(92);Oxalobacter{genus}(92);Oxalobacter_formigenes{species}(92)	Bacteria	Proteobacteria	Betaproteobacteria	Burkholderiales	Oxalobacteraceae	Oxalobacter	Oxalobacter_formigenes
ASV1314	13	0	0	0	0	0	4	0	8	7	1	0	0	0	7	6	0	0	0	3	0	0	0	0	12	0	0	0	2	0	2	0	0	0	3	0	0	0	0	0	68	Bacteria{superkingdom}(100);Firmicutes{phylum}(100);Erysipelotrichia{class}(100);Erysipelotrichales{order}(100);Erysipelotrichaceae{family}(100);Solobacterium{genus}(100);Unassigned{species}(0)	Bacteria	Firmicutes	Erysipelotrichia	Erysipelotrichales	Erysipelotrichaceae	Solobacterium	Unassigned
ASV1320	0	0	0	0	0	0	0	0	0	0	25	0	0	0	0	0	0	0	0	0	0	0	0	0	0	0	0	0	0	0	0	0	0	0	0	0	0	0	0	0	25	Bacteria{superkingdom}(100);Firmicutes{phylum}(100);Clostridia{class}(100);Clostridiales{order}(100);Ruminococcaceae{family}(100);Unassigned{genus}(0);Unassigned{species}(0)	Bacteria	Firmicutes	Clostridia	Clostridiales	Ruminococcaceae	Unassigned	Unassigned
ASV1321	0	0	0	0	0	0	0	0	0	0	0	0	0	0	0	0	0	0	101	0	0	0	0	0	0	0	0	6	0	0	0	0	63	0	0	0	0	0	0	0	170	Bacteria{superkingdom}(100);Firmicutes{phylum}(100);Clostridia{class}(100);Clostridiales{order}(100);Lachnospiraceae{family}(100);Clostridium_XlVb{genus}(100);Unassigned{species}(0)	Bacteria	Firmicutes	Clostridia	Clostridiales	Lachnospiraceae	Clostridium_XlVb	Unassigned
ASV1322	0	0	0	0	0	0	0	0	0	0	0	0	0	0	0	0	1	0	0	0	0	0	0	0	0	0	0	0	0	0	172	0	0	0	0	0	0	1	0	0	174	Bacteria{superkingdom}(100);Bacteroidetes{phylum}(100);Bacteroidia{class}(100);Bacteroidales{order}(100);Bacteroidaceae{family}(100);Bacteroides{genus}(100);Unassigned{species}(0)	Bacteria	Bacteroidetes	Bacteroidia	Bacteroidales	Bacteroidaceae	Bacteroides	Unassigned
ASV1323	0	0	0	0	0	0	0	0	0	0	0	0	0	1	0	0	0	0	0	0	0	162	0	0	0	0	0	0	0	0	0	0	0	0	3	0	0	0	0	0	166	Bacteria{superkingdom}(100);Firmicutes{phylum}(100);Clostridia{class}(100);Clostridiales{order}(100);Ruminococcaceae{family}(100);Faecalibacterium{genus}(100);Unassigned{species}(0)	Bacteria	Firmicutes	Clostridia	Clostridiales	Ruminococcaceae	Faecalibacterium	Unassigned
ASV1324	0	0	0	0	0	0	0	0	0	0	0	0	0	0	0	0	0	0	0	0	0	0	0	0	0	0	0	0	0	0	0	0	0	11	0	0	0	20	0	0	31	Bacteria{superkingdom}(100);Bacteroidetes{phylum}(100);Bacteroidia{class}(100);Bacteroidales{order}(100);Porphyromonadaceae{family}(100);Butyricimonas{genus}(100);Unassigned{species}(0)	Bacteria	Bacteroidetes	Bacteroidia	Bacteroidales	Porphyromonadaceae	Butyricimonas	Unassigned
ASV1325	0	0	0	0	0	0	0	0	0	0	0	0	0	0	0	0	0	0	0	0	0	0	0	0	0	0	0	0	0	0	0	0	0	0	0	0	87	0	0	0	87	Bacteria{superkingdom}(100);Bacteroidetes{phylum}(100);Bacteroidia{class}(100);Bacteroidales{order}(100);Bacteroidaceae{family}(100);Bacteroides{genus}(100);Unassigned{species}(0)	Bacteria	Bacteroidetes	Bacteroidia	Bacteroidales	Bacteroidaceae	Bacteroides	Unassigned
ASV1326	0	0	0	0	0	0	0	0	0	7	0	0	0	0	0	0	0	0	0	0	0	0	0	0	0	0	0	0	0	0	0	0	0	0	0	0	0	0	0	0	7	Bacteria{superkingdom}(100);Firmicutes{phylum}(100);Negativicutes{class}(100);Selenomonadales{order}(100);Veillonellaceae{family}(100);Veillonella{genus}(100);Unassigned{species}(0)	Bacteria	Firmicutes	Negativicutes	Selenomonadales	Veillonellaceae	Veillonella	Unassigned
ASV1327	0	0	0	0	0	0	0	0	0	0	0	0	0	0	0	0	0	0	0	0	0	0	0	0	0	0	0	0	0	0	0	127	11	0	0	102	0	0	0	0	240	Bacteria{superkingdom}(88);Bacteroidetes{phylum}(88);Bacteroidia{class}(88);Bacteroidales{order}(88);Bacteroidaceae{family}(88);Bacteroides{genus}(88);Bacteroides_finegoldii{species}(88)	Bacteria	Bacteroidetes	Bacteroidia	Bacteroidales	Bacteroidaceae	Bacteroides	Bacteroides_finegoldii
ASV1328	0	0	0	0	0	0	0	0	0	0	0	0	0	0	0	0	0	0	0	0	0	0	0	0	0	0	0	0	0	0	0	0	2	0	0	0	0	0	0	0	2	Bacteria{superkingdom}(100);Bacteroidetes{phylum}(100);Bacteroidia{class}(100);Bacteroidales{order}(100);Prevotellaceae{family}(100);Paraprevotella{genus}(100);uncultured_organism{species}(100)	Bacteria	Bacteroidetes	Bacteroidia	Bacteroidales	Prevotellaceae	Paraprevotella	uncultured_organism
ASV1330	0	0	0	0	0	0	0	205	0	0	0	0	0	0	0	0	0	0	0	0	0	0	0	0	0	0	0	108	0	0	0	0	0	0	0	0	0	0	0	0	313	Bacteria{superkingdom}(96);Firmicutes{phylum}(96);Clostridia{class}(96);Clostridiales{order}(96);Lachnospiraceae{family}(96);Lachnospiracea_incertae_sedis{genus}(96);Unassigned{species}(0)	Bacteria	Firmicutes	Clostridia	Clostridiales	Lachnospiraceae	Lachnospiracea_incertae_sedis	Unassigned
ASV1331	0	0	0	0	0	0	0	0	0	0	0	0	0	0	0	0	0	0	0	0	0	0	0	1	0	0	0	0	0	0	0	0	0	0	0	0	0	0	0	0	1	Bacteria{superkingdom}(86);Bacteroidetes{phylum}(86);Bacteroidia{class}(86);Bacteroidales{order}(86);Bacteroidaceae{family}(86);Bacteroides{genus}(86);Bacteroides_ovatus{species}(86)	Bacteria	Bacteroidetes	Bacteroidia	Bacteroidales	Bacteroidaceae	Bacteroides	Bacteroides_ovatus
ASV1332	4	0	0	13	0	0	0	0	0	0	0	0	0	0	0	0	0	0	1	0	0	0	0	0	0	0	5	0	37	0	0	0	0	0	0	0	63	0	0	0	123	Bacteria{superkingdom}(93);Bacteroidetes{phylum}(93);Bacteroidia{class}(93);Bacteroidales{order}(93);Bacteroidaceae{family}(93);Bacteroides{genus}(93);Bacteroides_ovatus{species}(93)	Bacteria	Bacteroidetes	Bacteroidia	Bacteroidales	Bacteroidaceae	Bacteroides	Bacteroides_ovatus
ASV1335	0	0	0	0	0	0	0	0	0	0	0	0	0	0	0	0	0	0	0	0	0	0	0	0	0	0	0	0	0	0	0	0	0	0	0	0	0	0	60	0	60	Bacteria{superkingdom}(100);Firmicutes{phylum}(100);Clostridia{class}(100);Clostridiales{order}(100);Lachnospiraceae{family}(100);Roseburia{genus}(100);Unassigned{species}(0)	Bacteria	Firmicutes	Clostridia	Clostridiales	Lachnospiraceae	Roseburia	Unassigned
ASV1336	0	0	0	0	0	0	0	0	0	0	0	0	0	0	0	0	0	0	0	0	0	0	0	0	0	0	0	0	0	32	7	0	0	6	0	0	0	0	0	0	45	Bacteria{superkingdom}(100);Firmicutes{phylum}(100);Clostridia{class}(100);Clostridiales{order}(100);Ruminococcaceae{family}(100);{genus}(100);Unassigned{species}(0)	Bacteria	Firmicutes	Clostridia	Clostridiales	Ruminococcaceae		Unassigned
ASV1338	0	0	0	0	0	0	0	0	0	0	0	0	0	0	0	0	0	0	0	0	0	0	131	0	0	0	0	0	0	0	0	0	0	0	0	0	0	0	0	0	131	Bacteria{superkingdom}(97);Firmicutes{phylum}(97);Clostridia{class}(97);Clostridiales{order}(97);Clostridiaceae_1{family}(97);Clostridium_sensu_stricto{genus}(97);Unassigned{species}(0)	Bacteria	Firmicutes	Clostridia	Clostridiales	Clostridiaceae_1	Clostridium_sensu_stricto	Unassigned
ASV1339	0	0	0	0	0	0	0	0	0	0	0	0	0	0	0	0	0	0	0	0	0	0	0	0	0	0	0	0	0	0	0	0	0	0	0	169	0	0	0	0	169	Bacteria{superkingdom}(100);Firmicutes{phylum}(100);Clostridia{class}(100);Clostridiales{order}(100);Ruminococcaceae{family}(100);Faecalibacterium{genus}(100);Unassigned{species}(0)	Bacteria	Firmicutes	Clostridia	Clostridiales	Ruminococcaceae	Faecalibacterium	Unassigned
ASV1340	0	0	0	0	0	0	56	0	0	0	0	0	0	0	0	0	0	0	0	0	0	0	0	0	0	0	0	0	0	0	0	0	0	0	0	0	0	0	0	0	56	Bacteria{superkingdom}(100);Bacteroidetes{phylum}(100);Bacteroidia{class}(100);Bacteroidales{order}(100);Prevotellaceae{family}(100);Prevotella{genus}(100);Unassigned{species}(0)	Bacteria	Bacteroidetes	Bacteroidia	Bacteroidales	Prevotellaceae	Prevotella	Unassigned
ASV1343	0	0	0	0	0	0	0	0	0	0	0	0	0	51	0	0	0	0	0	0	0	0	0	0	0	0	0	0	0	0	0	0	0	0	186	0	0	0	0	0	237	Bacteria{superkingdom}(100);Firmicutes{phylum}(100);Clostridia{class}(100);Clostridiales{order}(100);Lachnospiraceae{family}(100);{genus}(100);Unassigned{species}(0)	Bacteria	Firmicutes	Clostridia	Clostridiales	Lachnospiraceae		Unassigned
ASV1344	0	0	0	0	0	0	0	0	0	0	0	0	0	0	0	0	0	0	14	0	0	0	0	0	0	0	0	0	0	0	0	0	15	0	0	0	0	0	0	0	29	Bacteria{superkingdom}(89);Firmicutes{phylum}(89);Clostridia{class}(89);Clostridiales{order}(89);Lachnospiraceae{family}(89);Coprococcus{genus}(89);Unassigned{species}(0)	Bacteria	Firmicutes	Clostridia	Clostridiales	Lachnospiraceae	Coprococcus	Unassigned
ASV1345	0	0	0	0	0	0	0	0	0	0	0	0	0	0	0	0	0	0	0	0	0	0	0	0	0	0	0	0	0	0	0	0	0	0	0	0	0	0	0	32	32	Bacteria{superkingdom}(100);Firmicutes{phylum}(100);Clostridia{class}(100);Clostridiales{order}(100);Lachnospiraceae{family}(100);Dorea{genus}(100);Unassigned{species}(0)	Bacteria	Firmicutes	Clostridia	Clostridiales	Lachnospiraceae	Dorea	Unassigned
ASV1346	0	0	0	0	0	0	0	0	0	0	0	0	17	7	14	0	0	0	0	0	0	0	0	0	0	0	0	0	0	0	0	0	0	0	0	0	0	0	16	0	54	Bacteria{superkingdom}(100);Firmicutes{phylum}(100);Clostridia{class}(100);Clostridiales{order}(100);Lachnospiraceae{family}(100);Blautia{genus}(100);Unassigned{species}(0)	Bacteria	Firmicutes	Clostridia	Clostridiales	Lachnospiraceae	Blautia	Unassigned
ASV1347	0	0	0	0	0	0	0	0	0	0	0	26	0	0	0	0	0	0	0	0	0	0	0	0	0	0	0	0	0	0	0	33	0	0	0	0	0	0	0	0	59	Bacteria{superkingdom}(100);Bacteroidetes{phylum}(100);Bacteroidia{class}(100);Bacteroidales{order}(100);Bacteroidaceae{family}(100);Bacteroides{genus}(100);Bacteroides_fragilis{species}(100)	Bacteria	Bacteroidetes	Bacteroidia	Bacteroidales	Bacteroidaceae	Bacteroides	Bacteroides_fragilis
ASV1348	0	0	0	4	0	0	0	0	0	0	0	0	0	0	0	0	0	0	0	0	0	0	0	33	0	0	0	0	0	0	0	0	0	0	0	0	0	0	0	0	37	Bacteria{superkingdom}(83);Firmicutes{phylum}(83);Clostridia{class}(83);Clostridiales{order}(83);Ruminococcaceae{family}(83);Clostridium_IV{genus}(83);uncultured_bacterium{species}(83)	Bacteria	Firmicutes	Clostridia	Clostridiales	Ruminococcaceae	Clostridium_IV	uncultured_bacterium
ASV1349	0	0	0	0	0	0	0	3	35	0	0	0	0	0	0	0	0	0	0	0	0	0	0	0	0	0	0	0	0	0	0	0	0	0	4	0	0	0	0	0	42	Bacteria{superkingdom}(100);Firmicutes{phylum}(100);Bacilli{class}(100);Lactobacillales{order}(100);Lactobacillaceae{family}(100);Lactobacillus{genus}(100);Unassigned{species}(0)	Bacteria	Firmicutes	Bacilli	Lactobacillales	Lactobacillaceae	Lactobacillus	Unassigned
ASV1351	0	0	0	21	0	0	0	0	0	0	0	0	0	0	0	0	0	0	0	0	0	0	0	0	0	0	0	0	0	0	0	0	0	0	0	0	0	0	0	0	21	Bacteria{superkingdom}(100);Firmicutes{phylum}(100);Negativicutes{class}(100);Selenomonadales{order}(100);Acidaminococcaceae{family}(100);Phascolarctobacterium{genus}(100);Unassigned{species}(0)	Bacteria	Firmicutes	Negativicutes	Selenomonadales	Acidaminococcaceae	Phascolarctobacterium	Unassigned
ASV1354	0	146	0	0	0	0	0	0	0	0	0	0	0	0	0	0	0	0	0	0	99	0	0	0	0	0	0	0	0	0	0	0	0	0	0	0	0	0	0	0	245	Bacteria{superkingdom}(100);Firmicutes{phylum}(100);Clostridia{class}(100);Clostridiales{order}(100);Lachnospiraceae{family}(100);Dorea{genus}(100);Unassigned{species}(0)	Bacteria	Firmicutes	Clostridia	Clostridiales	Lachnospiraceae	Dorea	Unassigned
ASV1356	0	0	0	0	0	0	0	0	0	0	0	0	0	0	0	0	0	0	8	0	0	0	0	0	0	0	0	0	0	0	0	0	0	0	0	0	0	0	0	0	8	Bacteria{superkingdom}(100);Firmicutes{phylum}(100);Erysipelotrichia{class}(100);Erysipelotrichales{order}(100);Erysipelotrichaceae{family}(100);{genus}(100);uncultured_Bacillales_bacterium{species}(100)	Bacteria	Firmicutes	Erysipelotrichia	Erysipelotrichales	Erysipelotrichaceae		uncultured_Bacillales_bacterium
ASV1358	0	0	0	0	0	0	63	0	0	0	0	0	0	0	0	0	0	0	0	0	0	0	0	0	0	0	171	0	0	0	0	0	0	0	0	0	0	0	0	0	234	Bacteria{superkingdom}(86);Firmicutes{phylum}(86);Clostridia{class}(86);Clostridiales{order}(86);Ruminococcaceae{family}(86);Gemmiger{genus}(86);Unassigned{species}(0)	Bacteria	Firmicutes	Clostridia	Clostridiales	Ruminococcaceae	Gemmiger	Unassigned
ASV1361	0	0	0	0	29	5	0	0	0	0	0	0	0	0	29	0	0	14	0	0	0	0	0	0	0	10	0	0	0	0	0	0	0	0	0	0	0	0	0	0	87	Bacteria{superkingdom}(100);Actinobacteria{phylum}(100);Actinobacteria{class}(100);Actinomycetales{order}(100);Actinomycetaceae{family}(100);Actinomyces{genus}(100);Unassigned{species}(0)	Bacteria	Actinobacteria	Actinobacteria	Actinomycetales	Actinomycetaceae	Actinomyces	Unassigned
ASV1362	0	0	0	0	0	0	0	0	0	0	0	0	0	0	0	0	0	0	0	108	0	0	0	0	0	0	0	0	0	0	0	0	0	0	0	0	0	0	0	42	150	Bacteria{superkingdom}(100);Proteobacteria{phylum}(100);Betaproteobacteria{class}(100);Burkholderiales{order}(100);Sutterellaceae{family}(100);Parasutterella{genus}(100);Unassigned{species}(0)	Bacteria	Proteobacteria	Betaproteobacteria	Burkholderiales	Sutterellaceae	Parasutterella	Unassigned
ASV1367	0	0	0	0	0	0	0	214	0	0	0	0	0	0	0	0	0	0	0	0	0	0	0	0	0	0	0	80	0	0	0	0	0	0	0	0	0	0	0	0	294	Bacteria{superkingdom}(100);Firmicutes{phylum}(100);Clostridia{class}(100);Clostridiales{order}(100);Lachnospiraceae{family}(100);Blautia{genus}(100);Unassigned{species}(0)	Bacteria	Firmicutes	Clostridia	Clostridiales	Lachnospiraceae	Blautia	Unassigned
ASV1371	0	0	0	0	31	0	0	40	0	0	0	0	0	0	0	0	0	0	0	0	0	0	0	0	0	0	0	0	0	0	0	0	0	15	0	0	0	0	0	0	86	Bacteria{superkingdom}(100);Firmicutes{phylum}(100);Clostridia{class}(100);Clostridiales{order}(100);Lachnospiraceae{family}(100);Blautia{genus}(100);Unassigned{species}(0)	Bacteria	Firmicutes	Clostridia	Clostridiales	Lachnospiraceae	Blautia	Unassigned
ASV1374	0	0	0	0	0	0	0	0	0	0	0	0	0	0	0	0	0	0	14	0	0	0	0	0	0	0	0	0	0	0	0	0	0	0	0	0	0	0	0	0	14	Bacteria{superkingdom}(97);Firmicutes{phylum}(97);Clostridia{class}(97);Clostridiales{order}(97);Ruminococcaceae{family}(97);{genus}(97);uncultured_eubacterium_WCHB1-54{species}(97)	Bacteria	Firmicutes	Clostridia	Clostridiales	Ruminococcaceae		uncultured_eubacterium_WCHB1-54
ASV1375	0	0	0	0	0	0	0	0	0	0	0	0	0	16	0	0	0	0	0	0	0	0	0	0	0	0	0	0	0	0	0	0	0	0	27	0	0	0	0	0	43	Bacteria{superkingdom}(100);Actinobacteria{phylum}(100);Actinobacteria{class}(100);Coriobacteriales{order}(100);Coriobacteriaceae{family}(100);{genus}(100);Unassigned{species}(0)	Bacteria	Actinobacteria	Actinobacteria	Coriobacteriales	Coriobacteriaceae		Unassigned
ASV1378	0	0	0	0	0	0	0	0	0	0	0	18	0	8	0	0	0	0	1	0	0	6	0	0	0	0	0	0	0	0	0	18	0	13	0	0	0	11	0	0	75	Bacteria{superkingdom}(100);Bacteroidetes{phylum}(100);Bacteroidia{class}(100);Bacteroidales{order}(100);Rikenellaceae{family}(100);Alistipes{genus}(100);Unassigned{species}(0)	Bacteria	Bacteroidetes	Bacteroidia	Bacteroidales	Rikenellaceae	Alistipes	Unassigned
ASV1379	0	0	0	0	0	0	0	0	0	0	0	4	0	0	0	0	0	33	0	0	0	0	0	0	0	0	0	0	0	0	0	0	0	0	0	0	0	0	0	0	37	Bacteria{superkingdom}(100);Bacteroidetes{phylum}(100);Bacteroidia{class}(100);Bacteroidales{order}(100);Bacteroidaceae{family}(100);Bacteroides{genus}(100);Unassigned{species}(0)	Bacteria	Bacteroidetes	Bacteroidia	Bacteroidales	Bacteroidaceae	Bacteroides	Unassigned
ASV1380	0	0	0	0	0	0	0	0	0	0	0	0	0	0	0	0	0	0	0	0	0	0	0	0	0	0	0	0	0	0	0	0	0	0	0	159	0	0	0	0	159	Bacteria{superkingdom}(100);Firmicutes{phylum}(100);Clostridia{class}(100);Clostridiales{order}(100);Ruminococcaceae{family}(100);Faecalibacterium{genus}(100);Unassigned{species}(0)	Bacteria	Firmicutes	Clostridia	Clostridiales	Ruminococcaceae	Faecalibacterium	Unassigned
ASV1382	0	0	0	0	0	0	0	0	0	0	96	0	0	0	0	0	0	0	0	0	0	0	0	0	0	0	0	0	0	0	121	0	0	0	0	0	0	0	0	0	217	Bacteria{superkingdom}(100);Firmicutes{phylum}(100);Clostridia{class}(100);Clostridiales{order}(100);Lachnospiraceae{family}(100);Dorea{genus}(100);Unassigned{species}(0)	Bacteria	Firmicutes	Clostridia	Clostridiales	Lachnospiraceae	Dorea	Unassigned
ASV1383	0	9	0	0	0	0	0	0	0	0	0	0	7	6	0	0	0	0	0	0	30	0	0	0	0	0	0	0	0	7	0	0	11	0	17	0	0	0	0	0	87	Bacteria{superkingdom}(98);Firmicutes{phylum}(98);Erysipelotrichia{class}(98);Erysipelotrichales{order}(98);Erysipelotrichaceae{family}(98);Holdemania{genus}(98);uncultured_bacterium{species}(98)	Bacteria	Firmicutes	Erysipelotrichia	Erysipelotrichales	Erysipelotrichaceae	Holdemania	uncultured_bacterium
ASV1385	0	0	0	0	0	0	0	0	0	0	0	0	0	0	0	0	0	0	0	0	0	0	0	0	0	0	203	0	0	0	0	0	0	0	0	0	0	0	0	0	203	Bacteria{superkingdom}(100);Firmicutes{phylum}(100);{class}(100);{order}(100);{family}(100);{genus}(100);uncultured_rumen_bacterium{species}(100)	Bacteria	Firmicutes					uncultured_rumen_bacterium
ASV1387	0	5	8	0	0	0	0	0	0	0	10	0	10	0	10	0	0	0	0	0	7	0	0	0	3	0	0	0	0	0	0	0	0	1	0	0	0	0	0	0	54	Bacteria{superkingdom}(100);Firmicutes{phylum}(100);Clostridia{class}(100);Clostridiales{order}(100);Peptostreptococcaceae{family}(100);Peptostreptococcus{genus}(100);Unassigned{species}(0)	Bacteria	Firmicutes	Clostridia	Clostridiales	Peptostreptococcaceae	Peptostreptococcus	Unassigned
ASV1388	0	0	0	0	66	0	0	0	0	0	0	0	0	0	0	0	0	0	0	0	0	0	0	0	0	0	0	0	0	0	0	0	0	0	0	0	0	0	0	0	66	Bacteria{superkingdom}(100);Firmicutes{phylum}(100);Clostridia{class}(100);Clostridiales{order}(100);Peptostreptococcaceae{family}(100);Romboutsia{genus}(100);Unassigned{species}(0)	Bacteria	Firmicutes	Clostridia	Clostridiales	Peptostreptococcaceae	Romboutsia	Unassigned
ASV1389	0	0	0	0	194	0	0	0	0	0	0	0	0	0	0	0	0	0	0	0	0	0	0	0	0	0	0	0	0	0	0	0	0	0	0	0	0	0	0	0	194	Bacteria{superkingdom}(100);Proteobacteria{phylum}(100);Gammaproteobacteria{class}(100);Enterobacteriales{order}(100);Enterobacteriaceae{family}(100);Escherichia/Shigella{genus}(100);Unassigned{species}(0)	Bacteria	Proteobacteria	Gammaproteobacteria	Enterobacteriales	Enterobacteriaceae	Escherichia/Shigella	Unassigned
ASV1390	0	0	0	0	83	0	34	0	0	0	0	0	0	0	0	0	0	0	0	0	0	0	0	0	98	0	19	0	0	0	0	0	0	0	0	0	0	0	0	0	234	Bacteria{superkingdom}(100);Firmicutes{phylum}(100);Clostridia{class}(100);Clostridiales{order}(100);Lachnospiraceae{family}(100);Dorea{genus}(100);Unassigned{species}(0)	Bacteria	Firmicutes	Clostridia	Clostridiales	Lachnospiraceae	Dorea	Unassigned
ASV1391	0	0	0	0	0	0	5	0	0	0	0	2	0	0	0	0	0	0	24	0	0	0	0	0	0	0	43	0	0	0	0	0	0	0	0	0	0	0	0	0	74	Bacteria{superkingdom}(99);Firmicutes{phylum}(99);Clostridia{class}(99);Clostridiales{order}(99);Ruminococcaceae{family}(99);{genus}(99);Unassigned{species}(0)	Bacteria	Firmicutes	Clostridia	Clostridiales	Ruminococcaceae		Unassigned
ASV1392	0	0	0	0	0	0	0	0	0	0	0	0	0	0	0	0	0	0	30	0	0	0	0	0	0	0	0	0	0	0	0	0	0	0	0	0	0	0	0	0	30	Bacteria{superkingdom}(99);Firmicutes{phylum}(99);Clostridia{class}(99);Clostridiales{order}(99);{family}(99);{genus}(99);uncultured_rumen_bacterium{species}(99)	Bacteria	Firmicutes	Clostridia	Clostridiales			uncultured_rumen_bacterium
ASV1393	0	0	0	0	0	0	0	0	0	0	0	0	0	0	0	0	0	0	0	0	0	0	0	0	0	0	0	0	0	0	0	0	0	43	0	0	0	0	0	0	43	Bacteria{superkingdom}(95);Firmicutes{phylum}(95);Clostridia{class}(95);Clostridiales{order}(95);Lachnospiraceae{family}(95);Lachnospiracea_incertae_sedis{genus}(95);Unassigned{species}(0)	Bacteria	Firmicutes	Clostridia	Clostridiales	Lachnospiraceae	Lachnospiracea_incertae_sedis	Unassigned
ASV1395	0	0	0	0	0	0	0	0	0	0	0	0	0	0	0	0	0	0	8	0	0	0	0	0	0	0	0	0	0	0	0	0	0	0	0	0	0	0	0	0	8	Bacteria{superkingdom}(91);Firmicutes{phylum}(91);Clostridia{class}(91);Clostridiales{order}(91);{family}(91);{genus}(91);Unassigned{species}(0)	Bacteria	Firmicutes	Clostridia	Clostridiales			Unassigned
ASV1396	9	0	0	0	0	0	0	0	0	0	0	0	0	0	0	0	0	0	4	0	0	0	0	0	0	0	0	0	0	0	0	0	0	0	0	0	0	0	0	0	13	Bacteria{superkingdom}(87);Firmicutes{phylum}(87);Clostridia{class}(87);Clostridiales{order}(87);Ruminococcaceae{family}(87);Clostridium_IV{genus}(87);uncultured_Eubacterium_sp.{species}(87)	Bacteria	Firmicutes	Clostridia	Clostridiales	Ruminococcaceae	Clostridium_IV	uncultured_Eubacterium_sp.
ASV1403	0	0	0	0	0	0	0	32	0	0	0	0	0	0	0	0	0	0	0	0	0	0	0	0	0	0	0	0	0	0	0	0	0	0	0	0	0	0	0	0	32	Bacteria{superkingdom}(100);Firmicutes{phylum}(100);Bacilli{class}(100);Lactobacillales{order}(100);Leuconostocaceae{family}(100);Leuconostoc{genus}(100);Unassigned{species}(0)	Bacteria	Firmicutes	Bacilli	Lactobacillales	Leuconostocaceae	Leuconostoc	Unassigned
ASV1404	0	0	0	0	0	0	82	0	0	0	0	0	0	0	0	0	0	0	0	0	0	0	0	0	0	0	156	0	0	0	0	0	0	0	0	0	0	0	0	0	238	Bacteria{superkingdom}(95);Firmicutes{phylum}(95);Clostridia{class}(95);Clostridiales{order}(95);Lachnospiraceae{family}(95);{genus}(95);Unassigned{species}(0)	Bacteria	Firmicutes	Clostridia	Clostridiales	Lachnospiraceae		Unassigned
ASV1417	0	0	0	0	0	0	0	0	0	0	0	0	0	0	0	0	0	0	0	0	0	15	0	0	0	0	0	0	0	0	0	0	0	0	0	0	0	0	0	0	15	Bacteria{superkingdom}(98);Bacteroidetes{phylum}(98);Bacteroidia{class}(98);Bacteroidales{order}(98);Prevotellaceae{family}(98);Paraprevotella{genus}(98);uncultured_organism{species}(98)	Bacteria	Bacteroidetes	Bacteroidia	Bacteroidales	Prevotellaceae	Paraprevotella	uncultured_organism
ASV1421	0	0	0	0	0	0	77	0	0	0	0	0	0	0	0	0	0	0	0	0	0	0	0	0	0	0	75	0	0	0	0	0	0	0	0	0	0	0	0	0	152	Bacteria{superkingdom}(100);Firmicutes{phylum}(100);Clostridia{class}(100);Clostridiales{order}(100);Lachnospiraceae{family}(100);Blautia{genus}(100);Unassigned{species}(0)	Bacteria	Firmicutes	Clostridia	Clostridiales	Lachnospiraceae	Blautia	Unassigned
ASV1422	0	0	0	0	0	0	0	0	0	0	0	0	0	0	0	0	0	0	0	0	0	0	0	0	0	0	0	0	0	0	0	0	74	0	0	0	0	0	0	0	74	Bacteria{superkingdom}(100);Firmicutes{phylum}(100);Clostridia{class}(100);Clostridiales{order}(100);Lachnospiraceae{family}(100);Blautia{genus}(100);Unassigned{species}(0)	Bacteria	Firmicutes	Clostridia	Clostridiales	Lachnospiraceae	Blautia	Unassigned
ASV1423	0	0	0	0	0	0	0	0	0	0	0	0	0	199	0	0	0	0	0	0	0	0	0	0	0	0	0	0	0	0	0	0	0	0	65	0	0	0	0	0	264	Bacteria{superkingdom}(100);Firmicutes{phylum}(100);Clostridia{class}(100);Clostridiales{order}(100);Lachnospiraceae{family}(100);Roseburia{genus}(100);Unassigned{species}(0)	Bacteria	Firmicutes	Clostridia	Clostridiales	Lachnospiraceae	Roseburia	Unassigned
ASV1424	0	0	0	0	0	0	0	0	0	0	0	0	0	0	0	0	0	0	6	0	0	0	0	0	0	3	0	0	0	0	0	0	0	0	0	0	0	6	0	0	15	Bacteria{superkingdom}(97);Firmicutes{phylum}(97);Clostridia{class}(97);Clostridiales{order}(97);Peptococcaceae_1{family}(97);Peptococcus{genus}(97);uncultured_organism{species}(97)	Bacteria	Firmicutes	Clostridia	Clostridiales	Peptococcaceae_1	Peptococcus	uncultured_organism
ASV1425	0	0	20	9	0	0	0	0	0	0	0	0	0	0	0	0	0	0	0	0	0	0	0	0	0	0	0	0	0	0	0	0	0	0	0	0	0	0	0	0	29	Bacteria{superkingdom}(100);Firmicutes{phylum}(100);Bacilli{class}(100);Lactobacillales{order}(100);Streptococcaceae{family}(100);Streptococcus{genus}(100);Unassigned{species}(0)	Bacteria	Firmicutes	Bacilli	Lactobacillales	Streptococcaceae	Streptococcus	Unassigned
ASV1426	0	0	0	0	0	0	0	0	0	0	0	65	0	0	0	0	0	0	0	0	0	0	0	0	0	0	0	0	0	0	0	52	0	0	0	0	0	0	0	0	117	Bacteria{superkingdom}(100);Firmicutes{phylum}(100);Clostridia{class}(100);Clostridiales{order}(100);Lachnospiraceae{family}(100);Unassigned{genus}(0);Unassigned{species}(0)	Bacteria	Firmicutes	Clostridia	Clostridiales	Lachnospiraceae	Unassigned	Unassigned
ASV1427	0	0	0	0	0	0	0	0	0	0	0	5	0	0	0	0	0	0	0	0	0	0	0	0	0	0	0	0	0	0	0	17	0	0	0	0	0	0	0	0	22	Bacteria{superkingdom}(88);Firmicutes{phylum}(88);Clostridia{class}(88);Clostridiales{order}(88);Ruminococcaceae{family}(88);Oscillibacter{genus}(88);uncultured_Bacteroidetes_bacterium{species}(88)	Bacteria	Firmicutes	Clostridia	Clostridiales	Ruminococcaceae	Oscillibacter	uncultured_Bacteroidetes_bacterium
ASV1428	4	0	41	7	2	0	12	0	7	9	5	0	0	0	0	0	0	0	0	0	0	0	0	0	0	0	0	0	6	0	0	0	0	0	0	0	0	0	0	0	93	Bacteria{superkingdom}(100);Firmicutes{phylum}(100);Bacilli{class}(100);Bacillales{order}(100);Bacillales_Incertae_Sedis_XI{family}(100);Gemella{genus}(100);Unassigned{species}(0)	Bacteria	Firmicutes	Bacilli	Bacillales	Bacillales_Incertae_Sedis_XI	Gemella	Unassigned
ASV1429	0	0	0	0	0	0	0	0	0	0	0	0	0	0	0	0	0	0	0	0	0	0	4	0	5	0	0	0	0	0	0	0	0	0	0	0	0	0	0	0	9	Bacteria{superkingdom}(81);Firmicutes{phylum}(81);Clostridia{class}(81);Clostridiales{order}(81);Lachnospiraceae{family}(81);Clostridium_XlVa{genus}(81);Unassigned{species}(0)	Bacteria	Firmicutes	Clostridia	Clostridiales	Lachnospiraceae	Clostridium_XlVa	Unassigned
ASV1434	0	0	0	0	0	0	0	182	0	0	0	0	0	0	0	0	0	0	0	0	0	0	0	0	0	0	0	77	0	0	0	0	0	0	0	0	0	0	0	0	259	Bacteria{superkingdom}(100);Firmicutes{phylum}(100);Clostridia{class}(100);Clostridiales{order}(100);Lachnospiraceae{family}(100);Blautia{genus}(100);Unassigned{species}(0)	Bacteria	Firmicutes	Clostridia	Clostridiales	Lachnospiraceae	Blautia	Unassigned
ASV1435	0	31	0	0	0	0	0	0	0	0	0	0	0	0	0	0	0	0	0	0	30	0	0	0	0	0	0	0	0	0	11	0	0	0	0	0	32	0	0	0	104	Bacteria{superkingdom}(100);Proteobacteria{phylum}(100);Betaproteobacteria{class}(100);Burkholderiales{order}(100);Sutterellaceae{family}(100);{genus}(100);Unassigned{species}(0)	Bacteria	Proteobacteria	Betaproteobacteria	Burkholderiales	Sutterellaceae		Unassigned
ASV1436	0	0	0	0	0	0	0	0	0	0	0	0	0	0	0	0	0	0	0	0	0	0	0	0	0	0	0	0	0	0	0	0	0	0	0	0	0	5	0	0	5	Bacteria{superkingdom}(98);Firmicutes{phylum}(98);Clostridia{class}(98);Clostridiales{order}(98);Ruminococcaceae{family}(98);{genus}(98);uncultured_bacterium_adhufec311{species}(98)	Bacteria	Firmicutes	Clostridia	Clostridiales	Ruminococcaceae		uncultured_bacterium_adhufec311
ASV1437	0	0	0	0	0	0	0	0	0	0	0	0	0	0	168	0	0	0	0	0	0	0	0	0	0	0	0	0	0	0	0	0	0	0	0	0	0	0	0	0	168	Bacteria{superkingdom}(87);Firmicutes{phylum}(87);Clostridia{class}(87);Clostridiales{order}(87);Lachnospiraceae{family}(87);Lachnospiracea_incertae_sedis{genus}(87);uncultured_Eubacteriaceae_bacterium{species}(87)	Bacteria	Firmicutes	Clostridia	Clostridiales	Lachnospiraceae	Lachnospiracea_incertae_sedis	uncultured_Eubacteriaceae_bacterium
ASV1438	0	0	0	0	0	0	0	0	0	0	0	0	0	0	0	0	0	0	0	0	0	24	0	0	0	0	0	0	0	0	0	0	0	0	0	0	0	0	0	0	24	Bacteria{superkingdom}(96);Bacteroidetes{phylum}(96);Bacteroidia{class}(96);Bacteroidales{order}(96);Prevotellaceae{family}(96);Prevotella{genus}(96);Prevotellaceae_bacterium_DJF_VR15{species}(96)	Bacteria	Bacteroidetes	Bacteroidia	Bacteroidales	Prevotellaceae	Prevotella	Prevotellaceae_bacterium_DJF_VR15
ASV1439	0	0	0	0	0	15	0	0	0	0	0	0	0	0	0	0	0	0	0	0	0	0	0	0	0	44	0	0	0	0	0	0	0	0	0	0	0	0	0	0	59	Bacteria{superkingdom}(100);Firmicutes{phylum}(100);Clostridia{class}(100);Clostridiales{order}(100);Lachnospiraceae{family}(100);Unassigned{genus}(0);Unassigned{species}(0)	Bacteria	Firmicutes	Clostridia	Clostridiales	Lachnospiraceae	Unassigned	Unassigned
ASV1440	0	0	0	0	0	0	0	0	0	0	0	0	0	0	0	0	0	0	0	0	0	161	0	0	0	0	0	0	0	0	0	0	0	0	0	0	0	0	0	0	161	Bacteria{superkingdom}(100);Firmicutes{phylum}(100);Clostridia{class}(100);Clostridiales{order}(100);Ruminococcaceae{family}(100);Ruminococcus{genus}(100);Ruminococcus_callidus{species}(100)	Bacteria	Firmicutes	Clostridia	Clostridiales	Ruminococcaceae	Ruminococcus	Ruminococcus_callidus
ASV1443	0	0	0	0	0	0	0	0	0	0	0	4	0	0	0	0	0	0	0	0	0	0	0	0	0	0	0	0	0	0	0	10	0	0	0	0	0	7	0	0	21	Bacteria{superkingdom}(97);Firmicutes{phylum}(97);Clostridia{class}(97);Clostridiales{order}(97);{family}(97);{genus}(97);Unassigned{species}(0)	Bacteria	Firmicutes	Clostridia	Clostridiales			Unassigned
ASV1446	0	0	0	0	0	0	0	0	0	0	0	0	0	0	0	0	0	0	0	0	0	0	0	0	0	0	0	0	0	0	0	0	0	43	0	0	0	0	0	0	43	Bacteria{superkingdom}(100);Firmicutes{phylum}(100);Clostridia{class}(100);Clostridiales{order}(100);Lachnospiraceae{family}(100);Lachnospiracea_incertae_sedis{genus}(100);Unassigned{species}(0)	Bacteria	Firmicutes	Clostridia	Clostridiales	Lachnospiraceae	Lachnospiracea_incertae_sedis	Unassigned
ASV1447	0	0	0	0	0	0	0	0	0	0	0	0	0	0	0	0	0	0	4	0	0	0	0	0	0	0	0	0	0	0	0	0	0	0	0	0	0	0	0	0	4	Bacteria{superkingdom}(100);Firmicutes{phylum}(100);Clostridia{class}(100);Clostridiales{order}(100);{family}(100);{genus}(100);Unassigned{species}(0)	Bacteria	Firmicutes	Clostridia	Clostridiales			Unassigned
ASV1448	0	0	0	10	0	0	0	0	0	0	0	0	0	0	0	0	0	0	0	0	0	0	0	0	3	0	0	0	0	0	0	0	0	0	0	0	16	0	0	0	29	Bacteria{superkingdom}(100);Bacteroidetes{phylum}(100);Bacteroidia{class}(100);Bacteroidales{order}(100);Bacteroidaceae{family}(100);Bacteroides{genus}(100);Unassigned{species}(0)	Bacteria	Bacteroidetes	Bacteroidia	Bacteroidales	Bacteroidaceae	Bacteroides	Unassigned
ASV1450	0	0	0	0	0	0	0	0	0	0	0	0	0	0	0	0	0	0	0	0	0	0	0	0	0	0	0	0	0	0	0	0	0	0	0	49	0	0	0	0	49	Bacteria{superkingdom}(100);Bacteroidetes{phylum}(100);Bacteroidia{class}(100);Bacteroidales{order}(100);Rikenellaceae{family}(100);Alistipes{genus}(100);Unassigned{species}(0)	Bacteria	Bacteroidetes	Bacteroidia	Bacteroidales	Rikenellaceae	Alistipes	Unassigned
ASV1455	0	0	0	0	0	0	0	0	0	0	0	0	0	0	0	0	0	0	186	0	0	0	0	0	0	0	0	0	0	0	0	0	0	0	0	0	0	0	0	0	186	Bacteria{superkingdom}(99);Firmicutes{phylum}(99);{class}(99);{order}(99);{family}(99);{genus}(99);unidentified_rumen_bacterium_RF9{species}(99)	Bacteria	Firmicutes					unidentified_rumen_bacterium_RF9
ASV1459	0	0	0	0	0	0	0	42	0	0	0	0	0	0	0	14	0	0	0	0	0	0	0	0	0	0	0	0	0	0	0	0	0	0	0	0	0	0	0	0	56	Bacteria{superkingdom}(98);Firmicutes{phylum}(98);Clostridia{class}(98);Clostridiales{order}(98);Lachnospiraceae{family}(98);Clostridium_XlVa{genus}(98);Unassigned{species}(0)	Bacteria	Firmicutes	Clostridia	Clostridiales	Lachnospiraceae	Clostridium_XlVa	Unassigned
ASV1464	0	0	0	37	0	0	0	0	0	0	0	0	0	0	0	0	0	0	0	0	0	0	0	46	0	0	0	0	0	0	0	0	0	0	0	0	0	0	0	0	83	Bacteria{superkingdom}(100);Firmicutes{phylum}(100);Clostridia{class}(100);Clostridiales{order}(100);Ruminococcaceae{family}(100);Clostridium_IV{genus}(100);Unassigned{species}(0)	Bacteria	Firmicutes	Clostridia	Clostridiales	Ruminococcaceae	Clostridium_IV	Unassigned
ASV1466	0	0	0	0	0	0	0	0	0	0	0	0	0	0	0	0	0	0	0	0	0	0	0	0	0	0	0	0	0	0	0	0	0	0	0	16	0	0	0	0	16	Bacteria{superkingdom}(100);Bacteroidetes{phylum}(100);Bacteroidia{class}(100);Bacteroidales{order}(100);Bacteroidaceae{family}(100);Bacteroides{genus}(100);Unassigned{species}(0)	Bacteria	Bacteroidetes	Bacteroidia	Bacteroidales	Bacteroidaceae	Bacteroides	Unassigned
ASV1469	0	0	0	0	0	0	0	0	0	0	0	0	0	0	0	0	0	0	116	0	0	0	0	0	0	0	0	0	0	0	0	0	0	0	0	0	0	0	0	0	116	Bacteria{superkingdom}(100);Firmicutes{phylum}(100);Clostridia{class}(100);Clostridiales{order}(100);Ruminococcaceae{family}(100);Ruminococcus{genus}(100);Unassigned{species}(0)	Bacteria	Firmicutes	Clostridia	Clostridiales	Ruminococcaceae	Ruminococcus	Unassigned
ASV1470	0	0	0	0	0	0	0	0	0	0	0	0	0	0	0	0	0	0	0	0	0	0	0	0	0	5	0	0	9	0	0	0	0	0	84	0	0	0	0	0	98	Bacteria{superkingdom}(82);Firmicutes{phylum}(82);Clostridia{class}(82);Clostridiales{order}(82);Lachnospiraceae{family}(82);Clostridium_XlVa{genus}(82);Unassigned{species}(0)	Bacteria	Firmicutes	Clostridia	Clostridiales	Lachnospiraceae	Clostridium_XlVa	Unassigned
ASV1476	0	0	142	0	0	0	0	0	0	0	0	0	0	0	0	0	0	0	0	0	0	0	22	0	0	0	0	0	0	0	0	0	0	0	0	0	0	0	0	0	164	Bacteria{superkingdom}(100);Bacteroidetes{phylum}(100);Bacteroidia{class}(100);Bacteroidales{order}(100);Prevotellaceae{family}(100);Unassigned{genus}(0);Unassigned{species}(0)	Bacteria	Bacteroidetes	Bacteroidia	Bacteroidales	Prevotellaceae	Unassigned	Unassigned
ASV1482	0	0	0	0	0	0	0	0	0	0	0	0	0	70	0	0	0	0	0	0	0	0	0	0	0	0	0	0	0	0	0	0	0	0	159	0	0	0	0	0	229	Bacteria{superkingdom}(100);Firmicutes{phylum}(100);Clostridia{class}(100);Clostridiales{order}(100);Lachnospiraceae{family}(100);Roseburia{genus}(100);Unassigned{species}(0)	Bacteria	Firmicutes	Clostridia	Clostridiales	Lachnospiraceae	Roseburia	Unassigned
ASV1484	0	0	0	0	0	0	0	0	0	0	8	0	0	4	0	0	0	0	0	0	0	0	0	0	0	0	0	0	0	0	0	0	0	0	0	0	0	0	0	0	12	Bacteria{superkingdom}(94);Firmicutes{phylum}(94);Bacilli{class}(94);Lactobacillales{order}(94);Enterococcaceae{family}(94);Enterococcus{genus}(94);Unassigned{species}(0)	Bacteria	Firmicutes	Bacilli	Lactobacillales	Enterococcaceae	Enterococcus	Unassigned
ASV1488	0	0	0	0	0	0	0	161	0	0	0	0	0	0	0	0	0	0	0	0	0	0	0	0	0	0	0	85	0	0	0	0	0	0	0	0	0	0	0	0	246	Bacteria{superkingdom}(95);Firmicutes{phylum}(95);Clostridia{class}(95);Clostridiales{order}(95);Lachnospiraceae{family}(95);Lachnospiracea_incertae_sedis{genus}(95);uncultured_Eubacteriaceae_bacterium{species}(95)	Bacteria	Firmicutes	Clostridia	Clostridiales	Lachnospiraceae	Lachnospiracea_incertae_sedis	uncultured_Eubacteriaceae_bacterium
ASV1490	0	0	0	0	0	0	0	0	0	0	0	0	0	0	10	0	0	0	0	0	0	0	0	0	0	0	0	0	0	0	0	0	0	0	0	0	0	0	0	0	10	Bacteria{superkingdom}(100);Firmicutes{phylum}(100);Bacilli{class}(100);Lactobacillales{order}(100);Streptococcaceae{family}(100);Streptococcus{genus}(100);Unassigned{species}(0)	Bacteria	Firmicutes	Bacilli	Lactobacillales	Streptococcaceae	Streptococcus	Unassigned
ASV1496	0	0	0	0	0	0	0	0	0	0	150	0	0	0	0	0	0	0	0	0	0	0	0	0	0	0	0	0	0	0	0	0	0	0	0	0	0	0	0	0	150	Bacteria{superkingdom}(100);Firmicutes{phylum}(100);Bacilli{class}(100);Lactobacillales{order}(100);Leuconostocaceae{family}(100);Weissella{genus}(100);Unassigned{species}(0)	Bacteria	Firmicutes	Bacilli	Lactobacillales	Leuconostocaceae	Weissella	Unassigned
ASV1497	0	0	0	0	0	0	0	0	0	0	0	18	0	0	0	0	0	0	0	0	0	0	0	0	0	0	0	0	0	0	0	252	0	0	0	0	0	0	0	0	270	Bacteria{superkingdom}(100);Bacteroidetes{phylum}(100);Bacteroidia{class}(100);Bacteroidales{order}(100);Bacteroidaceae{family}(100);Bacteroides{genus}(100);Bacteroides_finegoldii{species}(100)	Bacteria	Bacteroidetes	Bacteroidia	Bacteroidales	Bacteroidaceae	Bacteroides	Bacteroides_finegoldii
ASV1498	0	0	0	0	0	0	0	0	0	0	0	0	0	0	0	0	0	0	36	0	0	0	0	0	0	0	0	0	0	0	0	0	0	0	0	0	0	0	0	0	36	Bacteria{superkingdom}(100);Firmicutes{phylum}(100);Clostridia{class}(100);Clostridiales{order}(100);Ruminococcaceae{family}(100);Ruminococcus{genus}(100);Unassigned{species}(0)	Bacteria	Firmicutes	Clostridia	Clostridiales	Ruminococcaceae	Ruminococcus	Unassigned
ASV1499	0	0	0	0	0	0	0	0	0	0	0	0	0	0	0	26	0	0	0	0	0	0	0	0	0	0	0	0	0	0	0	0	0	0	0	0	31	0	0	0	57	Bacteria{superkingdom}(100);Firmicutes{phylum}(100);Clostridia{class}(100);Clostridiales{order}(100);Lachnospiraceae{family}(100);Fusicatenibacter{genus}(100);Unassigned{species}(0)	Bacteria	Firmicutes	Clostridia	Clostridiales	Lachnospiraceae	Fusicatenibacter	Unassigned
ASV1501	0	0	0	39	0	0	0	0	0	0	0	0	0	0	0	0	0	0	0	0	0	0	0	37	0	0	0	0	0	0	0	0	0	0	0	0	0	0	0	0	76	Bacteria{superkingdom}(100);Firmicutes{phylum}(100);Clostridia{class}(100);Clostridiales{order}(100);Peptostreptococcaceae{family}(100);Romboutsia{genus}(100);Unassigned{species}(0)	Bacteria	Firmicutes	Clostridia	Clostridiales	Peptostreptococcaceae	Romboutsia	Unassigned
ASV1503	0	0	0	0	0	0	0	0	0	0	0	0	0	0	0	0	0	0	0	42	0	0	0	0	0	0	0	0	0	0	0	0	0	0	0	0	0	0	0	0	42	Bacteria{superkingdom}(99);Firmicutes{phylum}(99);Clostridia{class}(99);Clostridiales{order}(99);Lachnospiraceae{family}(99);Clostridium_XlVa{genus}(99);Unassigned{species}(0)	Bacteria	Firmicutes	Clostridia	Clostridiales	Lachnospiraceae	Clostridium_XlVa	Unassigned
ASV1504	0	0	0	0	0	0	0	0	0	0	0	0	0	0	0	0	0	0	0	0	0	0	0	0	0	0	0	0	65	0	0	0	0	0	0	0	0	0	0	0	65	Bacteria{superkingdom}(100);Bacteroidetes{phylum}(100);Bacteroidia{class}(100);Bacteroidales{order}(100);Porphyromonadaceae{family}(100);Parabacteroides{genus}(100);Unassigned{species}(0)	Bacteria	Bacteroidetes	Bacteroidia	Bacteroidales	Porphyromonadaceae	Parabacteroides	Unassigned
ASV1505	0	0	0	39	0	48	0	0	0	0	0	0	0	0	0	0	0	0	0	0	0	0	0	0	0	28	0	0	0	0	0	0	0	0	0	0	0	0	0	0	115	Bacteria{superkingdom}(100);Firmicutes{phylum}(100);Clostridia{class}(100);Clostridiales{order}(100);Ruminococcaceae{family}(100);Oscillibacter{genus}(100);Unassigned{species}(0)	Bacteria	Firmicutes	Clostridia	Clostridiales	Ruminococcaceae	Oscillibacter	Unassigned
ASV1506	0	0	0	0	0	0	0	0	141	0	0	0	0	0	0	0	0	0	0	0	0	0	0	0	0	0	0	0	52	0	0	0	0	0	0	0	0	0	0	0	193	Bacteria{superkingdom}(95);Firmicutes{phylum}(95);Clostridia{class}(95);Clostridiales{order}(95);Lachnospiraceae{family}(95);Lachnospiracea_incertae_sedis{genus}(95);Unassigned{species}(0)	Bacteria	Firmicutes	Clostridia	Clostridiales	Lachnospiraceae	Lachnospiracea_incertae_sedis	Unassigned
ASV1507	0	0	0	0	0	0	0	0	0	0	110	0	0	0	0	0	0	0	0	0	0	0	0	0	0	0	0	0	0	0	64	0	0	0	0	0	0	0	0	0	174	Bacteria{superkingdom}(100);Actinobacteria{phylum}(100);Actinobacteria{class}(100);Bifidobacteriales{order}(100);Bifidobacteriaceae{family}(100);Bifidobacterium{genus}(100);Unassigned{species}(0)	Bacteria	Actinobacteria	Actinobacteria	Bifidobacteriales	Bifidobacteriaceae	Bifidobacterium	Unassigned
ASV1508	0	0	0	0	0	7	0	0	0	0	0	4	0	0	0	0	0	0	0	0	0	1	0	0	0	10	0	0	0	0	0	0	0	0	0	0	0	0	2	0	24	Bacteria{superkingdom}(100);Firmicutes{phylum}(100);Bacilli{class}(100);Bacillales{order}(100);Bacillales_Incertae_Sedis_XI{family}(100);Gemella{genus}(100);Unassigned{species}(0)	Bacteria	Firmicutes	Bacilli	Bacillales	Bacillales_Incertae_Sedis_XI	Gemella	Unassigned
ASV1509	0	0	0	0	0	0	0	0	0	0	0	0	0	70	0	0	0	0	0	0	0	0	0	0	0	0	0	0	0	0	0	0	0	0	148	0	0	0	0	0	218	Bacteria{superkingdom}(100);Firmicutes{phylum}(100);Clostridia{class}(100);Clostridiales{order}(100);Lachnospiraceae{family}(100);Lachnospiracea_incertae_sedis{genus}(100);Unassigned{species}(0)	Bacteria	Firmicutes	Clostridia	Clostridiales	Lachnospiraceae	Lachnospiracea_incertae_sedis	Unassigned
ASV1510	0	0	0	1	0	0	0	0	0	0	0	2	0	0	0	0	0	0	0	0	0	0	0	0	0	0	0	9	0	0	7	7	0	2	0	0	2	0	0	0	30	Bacteria{superkingdom}(100);Firmicutes{phylum}(100);Clostridia{class}(100);Clostridiales{order}(100);Ruminococcaceae{family}(100);Unassigned{genus}(0);Unassigned{species}(0)	Bacteria	Firmicutes	Clostridia	Clostridiales	Ruminococcaceae	Unassigned	Unassigned
ASV1511	0	0	0	0	0	0	0	0	0	0	0	0	0	0	0	0	0	0	41	0	0	0	0	0	0	0	0	0	0	0	0	0	0	0	0	0	0	0	0	0	41	Bacteria{superkingdom}(87);Firmicutes{phylum}(87);Clostridia{class}(87);Clostridiales{order}(87);Ruminococcaceae{family}(87);Clostridium_IV{genus}(87);Unassigned{species}(0)	Bacteria	Firmicutes	Clostridia	Clostridiales	Ruminococcaceae	Clostridium_IV	Unassigned
ASV1512	0	0	0	0	0	0	0	94	0	0	0	0	0	0	0	0	0	0	0	0	0	0	0	0	0	0	0	64	0	0	0	0	0	0	0	0	0	0	0	0	158	Bacteria{superkingdom}(96);Firmicutes{phylum}(96);Clostridia{class}(96);Clostridiales{order}(96);Lachnospiraceae{family}(96);Dorea{genus}(96);Unassigned{species}(0)	Bacteria	Firmicutes	Clostridia	Clostridiales	Lachnospiraceae	Dorea	Unassigned
ASV1513	0	0	0	0	0	0	0	0	0	0	0	11	0	0	0	0	0	0	0	0	0	0	0	0	0	0	0	0	0	0	0	259	0	0	0	0	0	0	0	0	270	Bacteria{superkingdom}(100);Firmicutes{phylum}(100);Clostridia{class}(100);Clostridiales{order}(100);Ruminococcaceae{family}(100);Faecalibacterium{genus}(100);Unassigned{species}(0)	Bacteria	Firmicutes	Clostridia	Clostridiales	Ruminococcaceae	Faecalibacterium	Unassigned
ASV1514	0	6	0	0	0	0	0	0	0	0	0	0	0	0	0	0	0	0	38	0	1	0	0	0	0	0	0	0	0	0	0	0	0	0	0	0	0	0	0	0	45	Bacteria{superkingdom}(100);Bacteroidetes{phylum}(100);Bacteroidia{class}(100);Bacteroidales{order}(100);Bacteroidaceae{family}(100);Bacteroides{genus}(100);Unassigned{species}(0)	Bacteria	Bacteroidetes	Bacteroidia	Bacteroidales	Bacteroidaceae	Bacteroides	Unassigned
ASV1520	0	0	0	0	0	0	0	0	0	0	0	0	0	0	0	0	0	4	18	0	0	0	0	0	0	0	0	0	0	0	0	0	0	0	0	0	0	0	0	0	22	Bacteria{superkingdom}(100);Bacteroidetes{phylum}(100);Bacteroidia{class}(100);Bacteroidales{order}(100);Porphyromonadaceae{family}(100);Unassigned{genus}(0);Unassigned{species}(0)	Bacteria	Bacteroidetes	Bacteroidia	Bacteroidales	Porphyromonadaceae	Unassigned	Unassigned
ASV1522	0	54	0	0	0	0	0	0	0	0	0	0	0	0	0	0	0	0	0	0	34	0	0	0	0	0	0	0	0	0	0	0	0	0	0	0	0	0	0	0	88	Bacteria{superkingdom}(100);Firmicutes{phylum}(100);Clostridia{class}(100);Clostridiales{order}(100);Lachnospiraceae{family}(100);Roseburia{genus}(100);Unassigned{species}(0)	Bacteria	Firmicutes	Clostridia	Clostridiales	Lachnospiraceae	Roseburia	Unassigned
ASV1523	0	0	0	0	0	0	0	0	0	0	0	4	0	0	0	0	11	0	8	0	0	0	0	0	0	0	0	0	0	0	0	0	0	0	0	0	0	4	0	0	27	Bacteria{superkingdom}(100);Firmicutes{phylum}(100);Clostridia{class}(100);Clostridiales{order}(100);{family}(100);{genus}(100);bacterium_YE57{species}(100)	Bacteria	Firmicutes	Clostridia	Clostridiales			bacterium_YE57
ASV1524	0	0	0	0	0	0	0	0	0	0	0	0	0	0	0	0	0	0	0	117	0	0	0	0	0	0	0	0	0	0	0	0	0	0	0	0	0	0	0	88	205	Bacteria{superkingdom}(99);Bacteroidetes{phylum}(99);Bacteroidia{class}(99);Bacteroidales{order}(99);Bacteroidaceae{family}(99);Bacteroides{genus}(99);Bacteroides_caccae{species}(99)	Bacteria	Bacteroidetes	Bacteroidia	Bacteroidales	Bacteroidaceae	Bacteroides	Bacteroides_caccae
ASV1525	0	0	0	0	0	0	0	0	0	0	0	0	0	37	0	0	0	0	0	0	0	0	0	0	0	0	0	0	0	0	0	0	0	0	21	0	0	0	0	0	58	Bacteria{superkingdom}(97);Proteobacteria{phylum}(97);Gammaproteobacteria{class}(97);Enterobacteriales{order}(97);Enterobacteriaceae{family}(97);Raoultella{genus}(97);Unassigned{species}(0)	Bacteria	Proteobacteria	Gammaproteobacteria	Enterobacteriales	Enterobacteriaceae	Raoultella	Unassigned
ASV1528	0	0	0	0	0	0	0	0	16	0	25	0	0	0	26	0	0	0	0	0	0	0	0	0	0	0	0	0	0	0	0	0	0	0	0	0	0	0	0	0	67	Bacteria{superkingdom}(100);Firmicutes{phylum}(100);Bacilli{class}(100);Lactobacillales{order}(100);Streptococcaceae{family}(100);Streptococcus{genus}(100);Unassigned{species}(0)	Bacteria	Firmicutes	Bacilli	Lactobacillales	Streptococcaceae	Streptococcus	Unassigned
ASV1531	0	0	0	0	0	0	0	0	0	0	0	0	0	0	0	0	0	0	11	0	0	0	0	0	0	0	0	0	0	0	0	0	0	0	0	0	0	0	0	0	11	Bacteria{superkingdom}(100);Firmicutes{phylum}(100);Clostridia{class}(100);Clostridiales{order}(100);Clostridiales_Incertae_Sedis_XIII{family}(100);Anaerovorax{genus}(100);uncultured_organism{species}(100)	Bacteria	Firmicutes	Clostridia	Clostridiales	Clostridiales_Incertae_Sedis_XIII	Anaerovorax	uncultured_organism
ASV1532	0	0	0	0	0	0	0	0	0	0	0	0	0	0	0	0	0	0	0	3	0	0	0	0	0	0	0	0	0	0	0	0	0	0	0	0	0	0	0	1	4	Bacteria{superkingdom}(98);Firmicutes{phylum}(98);Clostridia{class}(98);Clostridiales{order}(98);Lachnospiraceae{family}(98);Clostridium_XlVa{genus}(98);Unassigned{species}(0)	Bacteria	Firmicutes	Clostridia	Clostridiales	Lachnospiraceae	Clostridium_XlVa	Unassigned
ASV1533	0	0	0	0	0	0	0	0	0	0	0	0	0	0	0	0	0	0	53	0	0	0	0	0	0	0	0	0	0	0	0	0	0	0	0	0	0	0	0	0	53	Bacteria{superkingdom}(100);Firmicutes{phylum}(100);Clostridia{class}(100);Clostridiales{order}(100);Lachnospiraceae{family}(100);Unassigned{genus}(0);Unassigned{species}(0)	Bacteria	Firmicutes	Clostridia	Clostridiales	Lachnospiraceae	Unassigned	Unassigned
ASV1534	0	0	0	0	0	0	164	0	0	0	0	0	0	0	0	0	0	0	0	0	0	0	0	0	0	0	60	0	0	0	0	0	0	0	0	0	0	0	0	0	224	Bacteria{superkingdom}(97);Firmicutes{phylum}(97);Clostridia{class}(97);Clostridiales{order}(97);Lachnospiraceae{family}(97);Lachnospiracea_incertae_sedis{genus}(97);Unassigned{species}(0)	Bacteria	Firmicutes	Clostridia	Clostridiales	Lachnospiraceae	Lachnospiracea_incertae_sedis	Unassigned
ASV1537	0	0	0	0	0	0	0	0	0	0	0	0	0	0	0	0	0	0	0	0	0	58	0	0	0	0	0	0	0	0	0	0	0	0	0	0	0	0	0	0	58	Bacteria{superkingdom}(100);Bacteroidetes{phylum}(100);Bacteroidia{class}(100);Bacteroidales{order}(100);Prevotellaceae{family}(100);Prevotella{genus}(100);Unassigned{species}(0)	Bacteria	Bacteroidetes	Bacteroidia	Bacteroidales	Prevotellaceae	Prevotella	Unassigned
ASV1539	0	0	0	0	0	69	0	0	0	27	0	0	0	0	0	0	0	0	0	0	0	0	0	0	0	0	0	0	0	71	24	0	0	0	0	0	0	0	0	0	191	Bacteria{superkingdom}(100);Firmicutes{phylum}(100);Clostridia{class}(100);Clostridiales{order}(100);Ruminococcaceae{family}(100);Clostridium_IV{genus}(100);Clostridium_leptum{species}(100)	Bacteria	Firmicutes	Clostridia	Clostridiales	Ruminococcaceae	Clostridium_IV	Clostridium_leptum
ASV1540	5	0	0	0	0	16	0	0	0	0	0	0	0	0	0	0	0	0	0	0	0	0	0	0	0	22	0	0	0	0	21	0	0	0	0	0	0	0	0	0	64	Bacteria{superkingdom}(83);Bacteroidetes{phylum}(83);Bacteroidia{class}(83);Bacteroidales{order}(83);Porphyromonadaceae{family}(83);Parabacteroides{genus}(83);Parabacteroides_distasonis{species}(83)	Bacteria	Bacteroidetes	Bacteroidia	Bacteroidales	Porphyromonadaceae	Parabacteroides	Parabacteroides_distasonis
ASV1544	0	0	0	0	0	0	0	0	0	0	0	0	0	0	0	0	0	0	0	69	0	0	0	0	0	0	0	0	0	0	0	0	0	0	0	0	0	0	0	0	69	Bacteria{superkingdom}(99);Firmicutes{phylum}(99);Clostridia{class}(99);Clostridiales{order}(99);Lachnospiraceae{family}(99);Clostridium_XlVa{genus}(99);Unassigned{species}(0)	Bacteria	Firmicutes	Clostridia	Clostridiales	Lachnospiraceae	Clostridium_XlVa	Unassigned
ASV1545	0	0	0	0	0	0	0	0	0	0	0	14	0	0	0	0	0	0	0	0	0	0	0	0	2	0	0	0	0	0	0	220	0	0	0	0	0	0	0	0	236	Bacteria{superkingdom}(91);Bacteroidetes{phylum}(91);Bacteroidia{class}(91);Bacteroidales{order}(91);Prevotellaceae{family}(91);{genus}(91);uncultured_bacterium{species}(91)	Bacteria	Bacteroidetes	Bacteroidia	Bacteroidales	Prevotellaceae		uncultured_bacterium
ASV1546	0	0	0	0	0	0	0	0	0	0	0	0	0	0	0	0	0	0	0	0	0	8	0	0	0	0	0	0	0	0	0	0	0	0	0	0	0	0	0	0	8	Bacteria{superkingdom}(100);Firmicutes{phylum}(100);{class}(100);{order}(100);{family}(100);{genus}(100);uncultured_Turicibacter_sp.{species}(100)	Bacteria	Firmicutes					uncultured_Turicibacter_sp.
ASV1547	0	46	0	0	0	0	0	0	0	0	0	0	14	15	0	0	0	0	0	0	24	0	0	0	0	0	0	0	0	0	0	0	0	0	30	0	0	0	0	0	129	Bacteria{superkingdom}(100);Firmicutes{phylum}(100);Clostridia{class}(100);Clostridiales{order}(100);Lachnospiraceae{family}(100);Blautia{genus}(100);Unassigned{species}(0)	Bacteria	Firmicutes	Clostridia	Clostridiales	Lachnospiraceae	Blautia	Unassigned
ASV1548	0	0	0	0	0	0	0	0	0	0	0	0	0	0	0	0	0	0	0	0	0	0	0	0	0	0	0	0	0	0	196	0	0	0	0	0	0	0	0	0	196	Bacteria{superkingdom}(100);Bacteroidetes{phylum}(100);Bacteroidia{class}(100);Bacteroidales{order}(100);Bacteroidaceae{family}(100);Bacteroides{genus}(100);Unassigned{species}(0)	Bacteria	Bacteroidetes	Bacteroidia	Bacteroidales	Bacteroidaceae	Bacteroides	Unassigned
ASV1550	0	0	0	0	0	0	0	0	0	19	0	0	0	0	0	0	0	0	0	0	0	0	0	0	0	0	0	0	0	39	0	0	0	0	0	0	0	0	0	0	58	Bacteria{superkingdom}(100);Proteobacteria{phylum}(100);Betaproteobacteria{class}(100);Burkholderiales{order}(100);Sutterellaceae{family}(100);Sutterella{genus}(100);Unassigned{species}(0)	Bacteria	Proteobacteria	Betaproteobacteria	Burkholderiales	Sutterellaceae	Sutterella	Unassigned
ASV1551	0	0	0	0	0	0	0	0	0	0	0	0	0	148	0	0	0	0	0	0	0	0	0	0	0	0	0	0	0	0	0	0	0	0	39	0	0	0	0	0	187	Bacteria{superkingdom}(91);Bacteroidetes{phylum}(91);Bacteroidia{class}(91);Bacteroidales{order}(91);Porphyromonadaceae{family}(91);Parabacteroides{genus}(91);Parabacteroides_distasonis{species}(91)	Bacteria	Bacteroidetes	Bacteroidia	Bacteroidales	Porphyromonadaceae	Parabacteroides	Parabacteroides_distasonis
ASV1555	0	0	0	0	0	0	0	0	0	0	0	7	0	0	0	0	3	0	9	0	0	0	0	0	0	0	5	0	0	0	0	9	5	0	0	0	3	0	0	0	41	Bacteria{superkingdom}(87);Firmicutes{phylum}(87);Clostridia{class}(87);Clostridiales{order}(87);Ruminococcaceae{family}(87);{genus}(87);Unassigned{species}(0)	Bacteria	Firmicutes	Clostridia	Clostridiales	Ruminococcaceae		Unassigned
ASV1556	0	0	0	0	0	0	0	0	0	0	0	0	0	0	46	0	0	0	0	0	0	0	0	0	0	0	0	0	0	0	0	0	0	0	0	0	0	0	0	0	46	Bacteria{superkingdom}(100);Firmicutes{phylum}(100);Clostridia{class}(100);Clostridiales{order}(100);Lachnospiraceae{family}(100);Blautia{genus}(100);Unassigned{species}(0)	Bacteria	Firmicutes	Clostridia	Clostridiales	Lachnospiraceae	Blautia	Unassigned
ASV1561	0	0	0	0	0	0	0	0	0	0	0	0	0	0	0	0	0	0	197	0	0	0	0	0	0	0	0	0	0	0	0	0	0	0	0	0	0	0	0	0	197	Bacteria{superkingdom}(100);Bacteroidetes{phylum}(100);Bacteroidia{class}(100);Bacteroidales{order}(100);Prevotellaceae{family}(100);Prevotella{genus}(100);Unassigned{species}(0)	Bacteria	Bacteroidetes	Bacteroidia	Bacteroidales	Prevotellaceae	Prevotella	Unassigned
ASV1562	0	0	0	0	0	0	0	0	0	0	0	0	0	0	0	0	0	0	0	0	0	0	0	0	0	0	0	0	0	0	0	0	190	0	0	0	0	0	0	0	190	Bacteria{superkingdom}(100);Bacteroidetes{phylum}(100);Bacteroidia{class}(100);Bacteroidales{order}(100);Prevotellaceae{family}(100);Unassigned{genus}(0);Unassigned{species}(0)	Bacteria	Bacteroidetes	Bacteroidia	Bacteroidales	Prevotellaceae	Unassigned	Unassigned
ASV1564	0	0	0	0	0	0	0	0	0	0	0	0	0	0	0	0	0	0	0	0	0	0	28	0	0	0	0	0	0	0	0	0	0	0	0	0	0	0	0	0	28	Bacteria{superkingdom}(81);Firmicutes{phylum}(81);Clostridia{class}(81);Clostridiales{order}(81);Clostridiaceae_1{family}(81);Clostridium_sensu_stricto{genus}(81);Unassigned{species}(0)	Bacteria	Firmicutes	Clostridia	Clostridiales	Clostridiaceae_1	Clostridium_sensu_stricto	Unassigned
ASV1565	0	0	0	0	0	0	0	0	0	0	0	0	0	184	0	0	0	0	0	0	0	0	0	0	0	0	0	0	0	0	0	0	0	0	0	0	0	0	0	0	184	Bacteria{superkingdom}(99);Firmicutes{phylum}(99);Bacilli{class}(99);Lactobacillales{order}(99);Enterococcaceae{family}(99);Enterococcus{genus}(99);Unassigned{species}(0)	Bacteria	Firmicutes	Bacilli	Lactobacillales	Enterococcaceae	Enterococcus	Unassigned
ASV1566	0	76	0	0	0	0	0	0	0	0	0	0	0	0	0	0	0	0	0	0	78	0	0	0	0	0	0	0	0	0	0	0	0	9	0	0	0	0	0	0	163	Bacteria{superkingdom}(87);Bacteroidetes{phylum}(87);Bacteroidia{class}(87);Bacteroidales{order}(87);Porphyromonadaceae{family}(87);Parabacteroides{genus}(87);Parabacteroides_distasonis{species}(87)	Bacteria	Bacteroidetes	Bacteroidia	Bacteroidales	Porphyromonadaceae	Parabacteroides	Parabacteroides_distasonis
ASV1567	0	0	0	188	0	0	0	0	0	0	0	0	0	0	0	0	0	0	0	0	0	0	0	0	0	0	0	0	0	0	0	0	0	0	0	0	0	0	0	0	188	Bacteria{superkingdom}(100);Bacteroidetes{phylum}(100);Bacteroidia{class}(100);Bacteroidales{order}(100);Prevotellaceae{family}(100);Prevotella{genus}(100);Unassigned{species}(0)	Bacteria	Bacteroidetes	Bacteroidia	Bacteroidales	Prevotellaceae	Prevotella	Unassigned
ASV1571	0	0	0	0	0	0	0	0	0	0	0	0	0	10	0	0	0	0	12	0	0	0	0	0	0	0	20	0	3	0	0	0	12	0	7	0	5	0	0	0	69	Bacteria{superkingdom}(87);Firmicutes{phylum}(87);Clostridia{class}(87);Clostridiales{order}(87);Clostridiales_Incertae_Sedis_XIII{family}(87);Anaerovorax{genus}(87);Unassigned{species}(0)	Bacteria	Firmicutes	Clostridia	Clostridiales	Clostridiales_Incertae_Sedis_XIII	Anaerovorax	Unassigned
ASV1574	0	0	0	0	0	0	0	0	0	0	0	0	0	0	0	0	0	0	0	0	0	0	0	0	0	0	0	0	0	0	0	0	176	0	0	0	0	0	0	0	176	Bacteria{superkingdom}(100);Bacteroidetes{phylum}(100);Bacteroidia{class}(100);Bacteroidales{order}(100);Prevotellaceae{family}(100);Unassigned{genus}(0);Unassigned{species}(0)	Bacteria	Bacteroidetes	Bacteroidia	Bacteroidales	Prevotellaceae	Unassigned	Unassigned
ASV1578	0	0	0	0	0	0	0	0	0	0	0	0	0	0	0	0	0	0	0	0	0	0	35	0	0	0	0	0	0	0	0	0	0	0	0	0	0	0	0	0	35	Bacteria{superkingdom}(100);Proteobacteria{phylum}(100);Gammaproteobacteria{class}(100);Pasteurellales{order}(100);Pasteurellaceae{family}(100);Haemophilus{genus}(100);Unassigned{species}(0)	Bacteria	Proteobacteria	Gammaproteobacteria	Pasteurellales	Pasteurellaceae	Haemophilus	Unassigned
ASV1580	0	0	0	0	0	0	0	0	0	0	0	0	0	0	0	0	17	0	0	0	0	0	0	0	0	0	0	0	0	0	0	0	0	0	0	0	0	21	0	0	38	Bacteria{superkingdom}(89);Bacteroidetes{phylum}(89);Bacteroidia{class}(89);Bacteroidales{order}(89);Porphyromonadaceae{family}(89);{genus}(89);uncultured_bacterium{species}(89)	Bacteria	Bacteroidetes	Bacteroidia	Bacteroidales	Porphyromonadaceae		uncultured_bacterium
ASV1582	0	0	0	0	0	0	0	0	0	0	0	0	0	0	0	0	0	0	24	0	0	0	0	0	0	0	0	0	0	0	0	0	0	0	0	0	0	0	0	0	24	Bacteria{superkingdom}(99);Firmicutes{phylum}(99);Clostridia{class}(99);Clostridiales{order}(99);Ruminococcaceae{family}(99);{genus}(99);Unassigned{species}(0)	Bacteria	Firmicutes	Clostridia	Clostridiales	Ruminococcaceae		Unassigned
ASV1583	0	0	0	0	50	0	0	0	0	0	0	0	0	0	0	0	0	0	0	0	0	0	0	0	22	0	0	0	0	0	0	0	0	0	0	0	0	0	0	0	72	Bacteria{superkingdom}(100);Actinobacteria{phylum}(100);Actinobacteria{class}(100);Actinomycetales{order}(100);Actinomycetaceae{family}(100);Actinomyces{genus}(100);Unassigned{species}(0)	Bacteria	Actinobacteria	Actinobacteria	Actinomycetales	Actinomycetaceae	Actinomyces	Unassigned
ASV1587	0	0	0	136	0	0	0	0	0	0	0	0	0	0	0	0	0	0	0	52	0	0	0	0	0	0	0	0	0	0	0	0	0	0	0	0	0	0	0	0	188	Bacteria{superkingdom}(100);Proteobacteria{phylum}(100);Betaproteobacteria{class}(100);Burkholderiales{order}(100);Sutterellaceae{family}(100);Parasutterella{genus}(100);Unassigned{species}(0)	Bacteria	Proteobacteria	Betaproteobacteria	Burkholderiales	Sutterellaceae	Parasutterella	Unassigned
ASV1588	0	0	0	0	63	0	0	0	0	0	0	0	0	0	0	0	0	0	0	0	0	0	0	0	103	0	0	0	0	0	0	0	0	0	0	0	0	0	0	0	166	Bacteria{superkingdom}(100);Firmicutes{phylum}(100);Clostridia{class}(100);Clostridiales{order}(100);Lachnospiraceae{family}(100);Anaerostipes{genus}(100);Unassigned{species}(0)	Bacteria	Firmicutes	Clostridia	Clostridiales	Lachnospiraceae	Anaerostipes	Unassigned
ASV1589	0	0	0	0	0	0	0	0	0	2	0	0	0	0	0	0	0	0	0	0	2	0	0	0	0	0	0	0	0	16	7	0	2	0	0	0	0	0	0	0	29	Bacteria{superkingdom}(87);Firmicutes{phylum}(87);Clostridia{class}(87);Clostridiales{order}(87);{family}(87);{genus}(87);uncultured_Thermoanaerobacterales_bacterium{species}(87)	Bacteria	Firmicutes	Clostridia	Clostridiales			uncultured_Thermoanaerobacterales_bacterium
ASV1591	0	0	0	0	0	0	166	0	0	0	0	0	0	0	0	0	0	0	0	0	0	0	0	0	0	0	34	0	0	0	0	0	0	0	0	0	0	0	0	0	200	Bacteria{superkingdom}(95);Firmicutes{phylum}(95);Erysipelotrichia{class}(95);Erysipelotrichales{order}(95);Erysipelotrichaceae{family}(95);Clostridium_XVIII{genus}(95);Unassigned{species}(0)	Bacteria	Firmicutes	Erysipelotrichia	Erysipelotrichales	Erysipelotrichaceae	Clostridium_XVIII	Unassigned
ASV1594	0	0	22	0	0	0	11	0	0	0	0	0	0	0	5	0	0	0	0	0	0	0	0	0	0	0	2	0	2	0	0	0	0	0	0	0	0	11	0	0	53	Bacteria{superkingdom}(100);Firmicutes{phylum}(100);Clostridia{class}(100);Clostridiales{order}(100);Clostridiales_Incertae_Sedis_XI{family}(100);Parvimonas{genus}(100);Unassigned{species}(0)	Bacteria	Firmicutes	Clostridia	Clostridiales	Clostridiales_Incertae_Sedis_XI	Parvimonas	Unassigned
ASV1597	0	0	0	0	0	0	0	0	0	0	0	0	0	0	0	0	0	0	0	0	0	0	0	0	0	0	0	0	0	0	0	0	0	0	0	0	167	0	0	0	167	Bacteria{superkingdom}(99);Firmicutes{phylum}(99);Clostridia{class}(99);Clostridiales{order}(99);Ruminococcaceae{family}(99);{genus}(99);Unassigned{species}(0)	Bacteria	Firmicutes	Clostridia	Clostridiales	Ruminococcaceae		Unassigned
ASV1599	0	0	0	0	0	0	0	0	0	0	0	0	0	0	0	0	0	0	0	0	0	0	0	0	0	0	0	0	0	0	0	0	0	0	0	39	0	0	0	0	39	Bacteria{superkingdom}(100);Firmicutes{phylum}(100);Clostridia{class}(100);Clostridiales{order}(100);Lachnospiraceae{family}(100);Ruminococcus2{genus}(100);Unassigned{species}(0)	Bacteria	Firmicutes	Clostridia	Clostridiales	Lachnospiraceae	Ruminococcus2	Unassigned
ASV1601	0	0	0	0	0	0	0	0	0	0	0	0	0	0	0	0	0	0	0	0	0	0	0	0	0	0	0	0	0	0	0	0	0	2	0	0	0	0	0	0	2	Bacteria{superkingdom}(100);Proteobacteria{phylum}(100);Gammaproteobacteria{class}(100);Pasteurellales{order}(100);Pasteurellaceae{family}(100);Aggregatibacter{genus}(100);Unassigned{species}(0)	Bacteria	Proteobacteria	Gammaproteobacteria	Pasteurellales	Pasteurellaceae	Aggregatibacter	Unassigned
ASV1604	0	0	0	0	0	0	0	0	0	0	0	0	0	0	0	0	0	0	0	0	0	0	0	0	0	0	0	0	0	5	0	0	0	0	0	0	0	0	0	0	5	Bacteria{superkingdom}(91);Bacteroidetes{phylum}(91);Bacteroidia{class}(91);Bacteroidales{order}(91);Porphyromonadaceae{family}(91);Parabacteroides{genus}(91);Parabacteroides_distasonis{species}(91)	Bacteria	Bacteroidetes	Bacteroidia	Bacteroidales	Porphyromonadaceae	Parabacteroides	Parabacteroides_distasonis
ASV1605	0	0	0	0	0	0	4	0	0	0	0	0	0	0	0	0	0	0	0	0	0	0	0	0	0	0	49	0	0	0	0	0	0	0	0	0	0	0	0	0	53	Bacteria{superkingdom}(92);Firmicutes{phylum}(92);Clostridia{class}(92);Clostridiales{order}(92);Ruminococcaceae{family}(92);{genus}(92);Unassigned{species}(0)	Bacteria	Firmicutes	Clostridia	Clostridiales	Ruminococcaceae		Unassigned
ASV1606	0	0	0	0	0	0	0	0	0	0	0	0	0	67	0	0	0	0	0	0	0	0	0	0	0	0	0	0	0	0	0	0	0	0	0	0	0	0	0	0	67	Bacteria{superkingdom}(97);Proteobacteria{phylum}(97);Gammaproteobacteria{class}(97);Enterobacteriales{order}(97);Enterobacteriaceae{family}(97);Raoultella{genus}(97);Unassigned{species}(0)	Bacteria	Proteobacteria	Gammaproteobacteria	Enterobacteriales	Enterobacteriaceae	Raoultella	Unassigned
ASV1607	0	0	0	0	0	0	0	0	0	0	0	0	0	0	0	0	3	2	0	0	0	0	0	0	0	0	4	0	0	0	0	0	0	0	0	0	0	0	0	0	9	Bacteria{superkingdom}(100);Actinobacteria{phylum}(100);Actinobacteria{class}(100);Coriobacteriales{order}(100);Coriobacteriaceae{family}(100);{genus}(100);uncultured_bacterium{species}(100)	Bacteria	Actinobacteria	Actinobacteria	Coriobacteriales	Coriobacteriaceae		uncultured_bacterium
ASV1608	0	0	0	0	0	9	0	0	0	0	0	0	0	0	0	0	0	0	0	0	0	0	0	0	0	0	0	0	0	0	3	0	0	0	0	0	25	0	0	0	37	Bacteria{superkingdom}(98);Firmicutes{phylum}(98);Clostridia{class}(98);Clostridiales{order}(98);{family}(98);{genus}(98);Unassigned{species}(0)	Bacteria	Firmicutes	Clostridia	Clostridiales			Unassigned
ASV1609	0	0	0	0	0	0	0	0	0	0	0	0	0	0	0	0	0	0	0	0	0	0	0	0	0	0	0	0	0	0	0	223	0	0	0	0	0	0	0	0	223	Bacteria{superkingdom}(100);Firmicutes{phylum}(100);Clostridia{class}(100);Clostridiales{order}(100);Ruminococcaceae{family}(100);Faecalibacterium{genus}(100);Unassigned{species}(0)	Bacteria	Firmicutes	Clostridia	Clostridiales	Ruminococcaceae	Faecalibacterium	Unassigned
ASV1610	0	0	0	0	0	0	0	0	0	0	0	0	0	0	0	0	4	0	5	0	0	0	0	0	0	0	0	0	0	0	0	0	0	0	0	0	0	50	0	0	59	Bacteria{superkingdom}(96);Firmicutes{phylum}(96);Clostridia{class}(96);Clostridiales{order}(96);Ruminococcaceae{family}(96);Clostridium_IV{genus}(96);Unassigned{species}(0)	Bacteria	Firmicutes	Clostridia	Clostridiales	Ruminococcaceae	Clostridium_IV	Unassigned
ASV1611	0	0	0	0	0	0	0	0	0	0	0	0	0	0	0	0	0	71	0	0	0	0	0	0	0	0	0	0	0	0	0	0	0	0	0	0	0	0	0	0	71	Bacteria{superkingdom}(100);Proteobacteria{phylum}(100);Alphaproteobacteria{class}(100);Rhodospirillales{order}(100);Rhodospirillaceae{family}(100);Aestuariispira{genus}(100);Unassigned{species}(0)	Bacteria	Proteobacteria	Alphaproteobacteria	Rhodospirillales	Rhodospirillaceae	Aestuariispira	Unassigned
ASV1616	0	0	0	0	0	0	0	0	0	0	0	0	0	0	0	0	8	0	0	0	0	0	0	0	0	0	6	0	0	0	7	0	0	0	0	0	0	6	0	0	27	Bacteria{superkingdom}(97);Synergistetes{phylum}(97);Synergistia{class}(97);Synergistales{order}(97);Synergistaceae{family}(97);Pyramidobacter{genus}(97);Pyramidobacter_piscolens{species}(97)	Bacteria	Synergistetes	Synergistia	Synergistales	Synergistaceae	Pyramidobacter	Pyramidobacter_piscolens
ASV1617	0	0	0	0	0	0	0	0	0	0	0	0	0	0	0	0	0	0	192	0	0	0	0	0	0	0	0	0	0	0	0	0	0	0	0	0	0	0	0	0	192	Bacteria{superkingdom}(95);Firmicutes{phylum}(95);Negativicutes{class}(95);Selenomonadales{order}(95);Veillonellaceae{family}(95);Dialister{genus}(95);Unassigned{species}(0)	Bacteria	Firmicutes	Negativicutes	Selenomonadales	Veillonellaceae	Dialister	Unassigned
ASV1618	12	0	0	0	0	0	0	0	3	9	0	0	0	0	0	18	0	0	0	0	0	0	0	0	0	0	0	0	0	0	0	0	0	0	0	0	21	0	0	0	63	Bacteria{superkingdom}(100);Actinobacteria{phylum}(100);Actinobacteria{class}(100);Actinomycetales{order}(100);Actinomycetaceae{family}(100);Actinomyces{genus}(100);Unassigned{species}(0)	Bacteria	Actinobacteria	Actinobacteria	Actinomycetales	Actinomycetaceae	Actinomyces	Unassigned
ASV1624	0	0	0	1	0	0	0	0	0	0	0	0	0	0	0	0	0	0	0	0	0	0	0	0	0	0	0	0	0	0	0	0	3	0	0	0	0	0	0	0	4	Bacteria{superkingdom}(100);Cyanobacteria/Chloroplast{phylum}(100);Chloroplast{class}(100);{order}(100);Chloroplast{family}(100);Streptophyta{genus}(100);Unassigned{species}(0)	Bacteria	Cyanobacteria/Chloroplast	Chloroplast		Chloroplast	Streptophyta	Unassigned
ASV1626	0	0	0	0	0	0	0	0	0	0	0	0	0	92	0	0	0	0	0	0	0	0	0	0	0	0	0	0	0	0	0	0	0	0	93	0	0	0	0	0	185	Bacteria{superkingdom}(100);Firmicutes{phylum}(100);Clostridia{class}(100);Clostridiales{order}(100);Ruminococcaceae{family}(100);Faecalibacterium{genus}(100);Unassigned{species}(0)	Bacteria	Firmicutes	Clostridia	Clostridiales	Ruminococcaceae	Faecalibacterium	Unassigned
ASV1627	0	0	0	0	0	0	0	0	0	0	0	0	0	0	0	0	0	0	0	0	0	0	89	0	0	0	29	0	0	0	0	0	0	0	0	0	0	0	0	0	118	Bacteria{superkingdom}(100);Firmicutes{phylum}(100);Clostridia{class}(100);Clostridiales{order}(100);Clostridiaceae_1{family}(100);Unassigned{genus}(0);Unassigned{species}(0)	Bacteria	Firmicutes	Clostridia	Clostridiales	Clostridiaceae_1	Unassigned	Unassigned
ASV1634	0	0	0	0	0	0	0	0	0	0	0	0	0	0	0	0	0	63	0	0	0	0	0	0	0	0	0	0	0	0	0	0	0	0	0	0	0	0	0	0	63	Bacteria{superkingdom}(100);Bacteroidetes{phylum}(100);Bacteroidia{class}(100);Bacteroidales{order}(100);Porphyromonadaceae{family}(100);{genus}(100);Unassigned{species}(0)	Bacteria	Bacteroidetes	Bacteroidia	Bacteroidales	Porphyromonadaceae		Unassigned
ASV1638	0	0	0	0	0	0	0	0	0	0	4	0	0	0	0	0	0	0	0	0	0	0	0	0	0	0	0	0	0	0	2	0	0	0	0	0	0	0	0	0	6	Bacteria{superkingdom}(96);Firmicutes{phylum}(96);Clostridia{class}(96);Clostridiales{order}(96);Lachnospiraceae{family}(96);Lachnospiracea_incertae_sedis{genus}(96);uncultured_Eubacteriaceae_bacterium{species}(96)	Bacteria	Firmicutes	Clostridia	Clostridiales	Lachnospiraceae	Lachnospiracea_incertae_sedis	uncultured_Eubacteriaceae_bacterium
ASV1643	0	0	0	0	0	0	0	0	0	0	0	0	0	0	0	0	0	0	0	0	0	0	0	0	0	0	8	0	0	0	0	0	0	0	0	0	0	0	0	0	8	Bacteria{superkingdom}(100);Firmicutes{phylum}(100);Clostridia{class}(100);Clostridiales{order}(100);Lachnospiraceae{family}(100);Butyrivibrio{genus}(100);uncultured_organism{species}(100)	Bacteria	Firmicutes	Clostridia	Clostridiales	Lachnospiraceae	Butyrivibrio	uncultured_organism
ASV1648	0	0	0	0	0	0	0	0	0	0	0	0	0	58	0	0	0	0	0	0	0	0	0	0	0	0	0	0	0	0	0	0	0	0	0	0	0	0	0	0	58	Bacteria{superkingdom}(100);Firmicutes{phylum}(100);Clostridia{class}(100);Clostridiales{order}(100);Peptostreptococcaceae{family}(100);Romboutsia{genus}(100);Unassigned{species}(0)	Bacteria	Firmicutes	Clostridia	Clostridiales	Peptostreptococcaceae	Romboutsia	Unassigned
ASV1650	0	0	0	0	0	0	0	0	0	0	0	0	0	0	0	0	0	0	0	0	0	0	0	0	0	0	0	0	0	0	0	0	5	0	3	0	12	0	0	0	20	Bacteria{superkingdom}(99);Firmicutes{phylum}(99);Clostridia{class}(99);Clostridiales{order}(99);Christensenellaceae{family}(99);Christensenella{genus}(99);Unassigned{species}(0)	Bacteria	Firmicutes	Clostridia	Clostridiales	Christensenellaceae	Christensenella	Unassigned
ASV1651	0	0	0	0	0	0	0	0	0	0	0	0	0	0	0	0	0	0	6	0	0	0	0	0	0	0	0	0	0	0	0	0	0	0	0	0	42	0	0	0	48	Bacteria{superkingdom}(88);Firmicutes{phylum}(88);Clostridia{class}(88);Clostridiales{order}(88);Ruminococcaceae{family}(88);{genus}(88);Unassigned{species}(0)	Bacteria	Firmicutes	Clostridia	Clostridiales	Ruminococcaceae		Unassigned
ASV1653	0	7	0	0	0	0	0	0	0	0	0	0	0	0	0	0	0	0	0	0	10	0	0	0	0	0	0	0	0	0	5	0	0	0	0	0	0	0	0	0	22	Bacteria{superkingdom}(82);Proteobacteria{phylum}(82);Betaproteobacteria{class}(82);Burkholderiales{order}(82);Sutterellaceae{family}(82);{genus}(82);uncultured_bacterium{species}(82)	Bacteria	Proteobacteria	Betaproteobacteria	Burkholderiales	Sutterellaceae		uncultured_bacterium
ASV1654	0	0	0	0	0	0	0	0	0	0	0	0	0	0	0	0	0	0	0	0	0	63	0	0	0	0	0	0	0	0	0	0	0	0	0	0	0	0	0	0	63	Bacteria{superkingdom}(100);Firmicutes{phylum}(100);{class}(100);{order}(100);{family}(100);{genus}(100);Unassigned{species}(0)	Bacteria	Firmicutes					Unassigned
ASV1656	0	0	0	0	0	0	0	0	0	0	0	0	0	0	0	0	0	0	0	0	0	0	0	0	0	0	0	0	0	0	174	0	0	0	0	0	0	0	0	0	174	Bacteria{superkingdom}(80);Bacteroidetes{phylum}(80);Bacteroidia{class}(80);Bacteroidales{order}(80);Porphyromonadaceae{family}(80);Barnesiella{genus}(80);uncultured_organism{species}(80)	Bacteria	Bacteroidetes	Bacteroidia	Bacteroidales	Porphyromonadaceae	Barnesiella	uncultured_organism
ASV1659	0	0	0	0	0	0	0	0	0	0	0	0	0	11	0	0	0	0	13	0	0	0	0	0	0	0	0	0	0	0	6	0	0	0	0	0	0	0	0	0	30	Bacteria{superkingdom}(99);Firmicutes{phylum}(99);Clostridia{class}(99);Clostridiales{order}(99);Ruminococcaceae{family}(99);Intestinimonas{genus}(99);Unassigned{species}(0)	Bacteria	Firmicutes	Clostridia	Clostridiales	Ruminococcaceae	Intestinimonas	Unassigned
ASV1661	0	0	0	0	0	0	0	0	0	0	0	0	0	0	0	0	0	0	0	0	0	0	0	0	0	0	0	0	0	0	0	0	0	7	0	0	0	0	0	0	7	Bacteria{superkingdom}(100);Bacteroidetes{phylum}(100);Bacteroidia{class}(100);Bacteroidales{order}(100);Bacteroidaceae{family}(100);Bacteroides{genus}(100);Unassigned{species}(0)	Bacteria	Bacteroidetes	Bacteroidia	Bacteroidales	Bacteroidaceae	Bacteroides	Unassigned
ASV1662	0	0	0	0	0	0	0	0	0	0	0	0	0	0	0	0	0	0	0	0	0	0	0	0	0	0	0	0	0	0	7	0	0	0	0	0	10	0	0	0	17	Bacteria{superkingdom}(100);Bacteroidetes{phylum}(100);Bacteroidia{class}(100);Bacteroidales{order}(100);Porphyromonadaceae{family}(100);Parabacteroides{genus}(100);Unassigned{species}(0)	Bacteria	Bacteroidetes	Bacteroidia	Bacteroidales	Porphyromonadaceae	Parabacteroides	Unassigned
ASV1663	0	0	21	0	0	0	0	0	0	0	0	0	0	0	0	0	0	0	0	0	0	0	0	0	0	0	0	0	0	0	0	0	0	0	19	0	0	0	0	0	40	Bacteria{superkingdom}(100);Proteobacteria{phylum}(100);Gammaproteobacteria{class}(100);Enterobacteriales{order}(100);Enterobacteriaceae{family}(100);Unassigned{genus}(0);Unassigned{species}(0)	Bacteria	Proteobacteria	Gammaproteobacteria	Enterobacteriales	Enterobacteriaceae	Unassigned	Unassigned
ASV1666	0	0	0	0	0	0	0	0	0	0	0	0	0	0	0	0	0	55	0	0	0	0	0	0	0	0	0	0	0	0	0	0	0	0	0	0	0	0	0	0	55	Bacteria{superkingdom}(99);Bacteroidetes{phylum}(99);Bacteroidia{class}(99);Bacteroidales{order}(99);Porphyromonadaceae{family}(99);Parabacteroides{genus}(99);uncultured_Bacteroidetes_bacterium{species}(99)	Bacteria	Bacteroidetes	Bacteroidia	Bacteroidales	Porphyromonadaceae	Parabacteroides	uncultured_Bacteroidetes_bacterium
[truncated: 1,736 more rows]
