# Supplementary material for: Effects of Hypoxemia by Acute High-Altitude Exposure on Human Intestinal Flora and Metabolism
Source: Microorganisms. 2023 Sep 11;11(9):2284. doi: 10.3390/microorganisms11092284 (PMC10535934; doi:10.3390/microorganisms11092284)
Supplement: Supplementary file 1 [file microorganisms-11-02284-s001.zip › SupplementaryTableS3.xlsx]

## Sheet: alpha.diversity.index
Supplementary Table S3: Alpha Diversity Indices in Samples from the C and D Groups
Samples	D1	D2	D3	D4	D5	D6	D7	D8	D9	D10	D11	D12	D13	D14	D15	D16	D17	D18	D19	D20	C1	C2	C3	C4	C5	C6	C7	C8	C9	C10	C11	C12	C13	C14	C15	C16	C17	C18	C19	C20
Observed	218	324	153	223	194	254	329	196	209	257	263	235	297	299	249	208	261	302	136	148	179	206	159	248	184	235	228	143	168	214	178	268	109	225	162	158	259	231	439	149
Chao1	222.333	329.353	153.5	227.667	196.368	257.235	350.368	198.546	211.154	260.3	272.1	235.667	298.565	304.217	250.154	209.154	282.111	311.546	137.75	150	179.5	211.5	162.667	254	185.615	236	230.75	143	169.154	217.6	182.714	273.353	111	230	166	161.5	264.571	233.647	446.65	149.75
ACE	224.831	329.74	154.067	225.748	198.543	259.188	346.031	199.132	212.51	262.012	269.009	236.802	300.854	306.757	250.859	211.139	272.177	308.098	139.357	150.745	180.437	211.308	165.208	257.18	187.114	237.793	233.979	143.242	170.414	217.588	184.361	273.81	114.696	226.924	166.859	161.922	265.045	235.533	444.835	150.577
Shannon	3.92302	4.21377	3.64755	4.21081	3.5144	4.33162	4.52888	4.01018	3.96217	4.29712	4.3125	4.11338	4.4372	4.3554	4.05129	4.23057	4.24706	4.59263	3.14786	3.78332	3.7301	4.17856	3.21936	4.2434	3.60251	4.01118	3.94008	3.69213	3.59025	4.2483	3.46644	4.14358	2.56578	4.33274	3.55546	3.67338	4.13106	4.1485	4.40638	3.7685
Simpson	0.047475	0.0500576	0.0508304	0.0227285	0.0630248	0.0218874	0.0201853	0.0336509	0.0336687	0.0243606	0.024218	0.0375003	0.0222908	0.0278319	0.03822	0.0253411	0.0274541	0.0186122	0.0855888	0.0426507	0.0440396	0.0269602	0.0953501	0.0243195	0.0498695	0.0385864	0.0382426	0.0407462	0.0520054	0.0212833	0.0663467	0.0366296	0.134847	0.0214952	0.064484	0.0434278	0.0347559	0.0291913	0.055115	0.0459059
Coverage	0.999666	0.99964	0.999923	0.999794	0.999743	0.999717	0.999254	0.999794	0.999794	0.999691	0.99964	0.999871	0.999768	0.999588	0.999846	0.999846	0.999486	0.999614	0.99982	0.999871	0.999897	0.999717	0.999717	0.999588	0.99982	0.99982	0.999717	0.999974	0.999846	0.999768	0.999691	0.99964	0.999794	0.999846	0.999768	0.999794	0.999666	0.999743	0.999537	0.999897
