# Supplementary material for: Effects of Hypoxemia by Acute High-Altitude Exposure on Human Intestinal Flora and Metabolism
Source: Microorganisms. 2023 Sep 11;11(9):2284. doi: 10.3390/microorganisms11092284 (PMC10535934; doi:10.3390/microorganisms11092284)
Supplement: Supplementary file 1 [file microorganisms-11-02284-s001.zip › SupplementaryTableS4.xlsx]

## Sheet: 16s-phylum.taxon.Abundance
Supplementary Table S4: Abundance of 16S phylum taxa in groups C and D
phylum	D3	D4	D11	D14	D17	D18	D20	D24	D25	D27	D28	D29	D33	D37	D38	D40	D41	D42	D48	D50	C3	C4	C11	C14	C17	C18	C20	C24	C25	C27	C28	C29	C33	C37	C38	C40	C41	C42	C48	C50	Abundance	superkingdom
Firmicutes	22498	29600	22703	27893	35125	29392	28485	20641	22798	19374	24064	17858	26519	22247	26853	19854	19841	21214	15897	27206	29532	25409	20968	29234	32074	27880	35096	28054	24037	27684	27567	22721	25699	24260	23342	26347	27105	22358	21237	20578	1001244	Bacteria
Bacteroidetes	11055	5763	257	5539	1018	5112	9440	11782	12428	14931	11221	14023	8389	12461	1159	18548	15304	15294	13896	3793	7750	9258	586	3963	491	4880	2752	241	169	5752	53	13077	93	8984	1142	598	7398	6274	7759	14246	286879	Bacteria
Actinobacteria	2913	237	2902	4160	1957	1905	578	3775	1666	3710	2112	6183	2762	1645	7165	236	3364	925	490	7494	391	1558	12166	2133	2231	1620	799	5696	10973	4675	4005	1966	892	4445	12943	4708	1621	9302	983	2855	142141	Bacteria
Proteobacteria	1304	3276	12991	1277	773	2292	355	2682	964	846	574	816	329	2512	3644	157	344	1435	4852	381	1193	1626	5156	3543	4061	3966	191	4825	2988	759	6747	1115	12179	1129	1419	7222	2747	831	485	1201	105187	Bacteria
Verrucomicrobia	0	2	0	0	0	178	4	0	1024	0	894	0	688	0	57	67	0	1	75	0	0	0	0	0	0	521	0	0	688	0	485	0	0	53	0	0	0	85	8348	0	13170	Bacteria
Fusobacteria	1076	0	27	0	4	0	0	0	0	13	0	0	0	0	0	0	0	0	3668	0	0	1027	0	0	0	0	0	4	4	0	0	0	15	1	10	3	0	13	0	0	5865	Bacteria
Candidatus_Saccharibacteria	11	0	0	0	3	1	0	0	0	1	4	0	3	0	2	0	1	0	0	6	12	2	3	6	23	0	34	60	20	8	21	0	2	0	22	2	1	5	0	0	253	Bacteria
No_Rank	0	0	0	0	0	0	0	0	0	3	0	0	184	0	0	0	0	4	0	0	0	0	0	0	0	0	0	0	0	0	0	0	0	0	0	0	0	0	19	0	210	-
Unassigned	8	2	0	7	0	0	7	0	0	2	0	0	1	11	0	1	26	0	2	0	2	0	0	0	0	0	5	0	1	0	2	0	0	8	0	0	0	12	4	0	101	Bacteria
Synergistetes	0	0	0	0	0	0	6	0	0	0	11	0	0	4	0	17	0	7	0	0	0	0	0	0	0	0	0	0	0	0	0	0	0	0	0	0	8	0	21	0	74	Bacteria
Cyanobacteria/Chloroplast	15	0	0	4	0	0	5	0	0	0	0	0	3	0	0	0	0	0	0	0	0	0	1	1	0	10	3	0	0	2	0	0	0	0	0	0	0	0	0	0	44	Bacteria
Tenericutes	0	0	0	0	0	0	0	0	0	0	0	0	0	0	0	0	0	0	0	0	0	0	0	0	0	0	0	0	0	0	0	0	0	0	0	0	0	0	15	0	15	Bacteria
Lentisphaerae	0	0	0	0	0	0	0	0	0	0	0	0	0	0	0	0	0	0	0	0	0	0	0	0	0	0	0	0	0	0	0	0	0	0	0	0	0	0	9	0	9	Bacteria
Parcubacteria	0	0	0	0	0	0	0	0	0	0	0	0	2	0	0	0	0	0	0	0	0	0	0	0	0	0	0	0	0	0	0	0	0	0	2	0	0	0	0	0	4	Bacteria
Acidobacteria	0	0	0	0	0	0	0	0	0	0	0	0	0	0	0	0	0	0	0	0	0	0	0	0	0	2	0	0	0	0	0	1	0	0	0	0	0	0	0	0	3	Bacteria
Ignavibacteriae	0	0	0	0	0	0	0	0	0	0	0	0	0	0	0	0	0	0	0	0	0	0	0	0	0	1	0	0	0	0	0	0	0	0	0	0	0	0	0	0	1	Bacteria

## Sheet: 16s-genus.taxon.Abundance
Supplementary Table S4: Abundance of 16S genus taxa in groups C and D.
genus	D3	D4	D11	D14	D17	D18	D20	D24	D25	D27	D28	D29	D33	D37	D38	D40	D41	D42	D48	D50	C3	C4	C11	C14	C17	C18	C20	C24	C25	C27	C28	C29	C33	C37	C38	C40	C41	C42	C48	C50	Abundance	superkingdom	phylum	class	order	family
Bacteroides	9716	2007	209	5253	725	2569	3055	10649	8952	10411	8275	9357	2156	9044	584	12578	11358	8080	13786	2879	7677	7906	267	2679	450	1826	444	211	144	4522	48	6963	69	6425	1138	561	3349	4639	4194	12028	197183	Bacteria	Bacteroidetes	Bacteroidia	Bacteroidales	Bacteroidaceae
Blautia	2033	2897	939	3798	11726	4339	3942	3649	2749	1798	3692	3022	5988	1819	3463	3037	2719	1674	760	2866	4656	2526	1642	2043	8098	3294	5293	8157	4180	3171	4672	2977	5427	2727	3651	1338	2218	3629	1559	1484	139652	Bacteria	Firmicutes	Clostridia	Clostridiales	Lachnospiraceae
Lachnospiracea_incertae_sedis	1497	1578	5580	3193	2834	3657	2104	3673	1219	1256	1556	1724	1805	2871	3609	495	1594	3414	4840	2444	1317	1356	4967	1664	4066	5629	3396	4246	2357	2950	6341	1846	9709	1759	4153	2345	6826	3596	790	1483	121739	Bacteria	Firmicutes	Clostridia	Clostridiales	Lachnospiraceae
Faecalibacterium	4439	1647	1628	4124	3013	3682	790	1877	5016	2753	3797	3625	979	2472	5723	3165	2614	2568	59	6574	6464	4359	947	2926	467	1468	484	1471	2271	2756	145	2848	248	3120	2930	1006	1837	917	899	6568	104676	Bacteria	Firmicutes	Clostridia	Clostridiales	Ruminococcaceae
Bifidobacterium	2435	124	2687	1985	1325	858	0	3651	681	1389	1392	5916	469	667	2531	14	2544	471	305	3567	272	1306	11560	1710	1684	789	0	5428	8875	3922	3218	1426	854	3403	11313	4196	798	6818	574	1263	102420	Bacteria	Actinobacteria	Actinobacteria	Bifidobacteriales	Bifidobacteriaceae
Unassigned	761	1647	1491	1378	958	1517	4503	229	1011	1513	1102	1706	1740	1447	2037	1456	1766	2156	1473	1363	829	753	986	686	1607	2007	4827	412	1164	1731	5334	1770	388	1258	1715	1374	2834	1483	1924	508	64844	Bacteria	Firmicutes	Clostridia	Clostridiales	Ruminococcaceae
Escherichia/Shigella	389	734	5903	1187	252	2233	228	2639	572	561	143	572	51	1999	1587	20	200	385	4224	88	253	456	4510	952	3110	3917	73	2672	392	478	6191	296	11796	237	1348	1636	857	651	79	400	64271	Bacteria	Proteobacteria	Gammaproteobacteria	Enterobacteriales	Enterobacteriaceae
Ruminococcus	305	7866	19	63	11	1552	2246	887	1988	1991	1521	1913	1474	1685	1493	1026	1388	1513	1198	2661	322	0	4	18	21	927	1262	1121	533	3313	1065	6594	170	2745	54	26	3890	3383	279	1763	60290	Bacteria	Firmicutes	Clostridia	Clostridiales	Ruminococcaceae
No_Rank	505	1973	85	989	881	1509	5702	1704	999	739	1625	1413	5217	1693	1927	846	1442	1075	1022	1983	1409	671	13	716	886	3280	4866	1132	238	606	685	2296	45	1341	726	205	752	588	3339	945	58068	-	-	-	-	-
Dorea	839	930	425	2404	1810	2508	1354	515	627	399	973	331	999	517	171	935	640	658	508	837	643	1211	994	1168	2018	1327	2994	805	1027	1516	1063	496	384	116	1449	2943	1112	1097	1352	188	42283	Bacteria	Firmicutes	Clostridia	Clostridiales	Lachnospiraceae
Alistipes	630	184	0	73	145	1416	2562	509	2850	3929	1604	2323	3805	1192	227	2298	2004	3013	0	627	33	631	0	33	4	1156	520	4	23	1151	4	2702	3	692	0	0	2017	925	278	1535	41102	Bacteria	Bacteroidetes	Bacteroidia	Bacteroidales	Rikenellaceae
Roseburia	577	1597	1398	829	516	787	170	529	123	1032	2854	257	117	711	2047	649	300	1684	2625	626	4818	2096	10	403	320	265	154	0	0	1538	216	601	12	1621	165	2481	97	1268	318	1160	36971	Bacteria	Firmicutes	Clostridia	Clostridiales	Lachnospiraceae
Ruminococcus2	1763	839	1652	1579	0	31	553	860	1092	541	267	157	1104	377	160	225	1790	312	0	358	1974	2094	1451	1181	30	19	1116	232	2223	381	802	787	106	82	0	8515	254	940	77	133	36057	Bacteria	Firmicutes	Clostridia	Clostridiales	Lachnospiraceae
Gemmiger	0	214	80	1510	897	3126	1129	814	2400	645	174	259	1267	475	119	1165	505	803	0	1235	1026	3	175	1837	335	5312	346	1819	2752	398	163	398	0	141	60	150	1079	441	43	1089	34384	Bacteria	Firmicutes	Clostridia	Clostridiales	Ruminococcaceae
Collinsella	386	55	213	1983	512	417	386	0	907	2018	606	148	1265	748	4101	75	583	348	157	3902	3	196	590	269	430	350	439	0	2014	645	710	411	0	878	1462	434	487	1956	215	1564	31863	Bacteria	Actinobacteria	Actinobacteria	Coriobacteriales	Coriobacteriaceae
Clostridium_XVIII	225	57	920	819	1638	671	1964	763	971	1021	504	109	551	823	23	121	466	320	226	678	3259	164	203	468	1360	435	2911	2538	377	998	338	168	386	33	1924	1893	240	433	18	498	31514	Bacteria	Firmicutes	Erysipelotrichia	Erysipelotrichales	Erysipelotrichaceae
Romboutsia	523	457	282	1089	251	529	736	304	2462	581	57	341	158	100	945	229	647	580	1068	14	213	767	439	1985	2469	550	367	57	88	464	580	153	2966	1950	970	123	3019	686	72	0	29271	Bacteria	Firmicutes	Clostridia	Clostridiales	Peptostreptococcaceae
Fusicatenibacter	323	265	156	903	712	126	226	620	86	397	355	1653	85	620	601	678	658	401	200	1130	920	534	332	459	2679	75	762	1541	296	1138	458	1218	263	1118	121	450	297	1145	228	810	25039	Bacteria	Firmicutes	Clostridia	Clostridiales	Lachnospiraceae
Streptococcus	4434	510	460	383	179	175	48	15	299	169	342	55	457	266	1994	213	247	85	181	39	150	1411	43	482	282	606	172	62	4622	658	672	17	3171	966	191	371	182	230	9	37	24885	Bacteria	Firmicutes	Bacilli	Lactobacillales	Streptococcaceae
Coprococcus	334	953	308	1346	591	823	621	554	221	272	745	350	247	601	29	862	684	355	0	1237	131	181	633	631	438	439	410	210	367	519	388	420	0	46	1005	991	177	1085	1510	659	21373	Bacteria	Firmicutes	Clostridia	Clostridiales	Lachnospiraceae
Holdemanella	0	2532	0	0	5963	8	0	0	0	0	0	0	1511	0	0	1296	0	467	0	0	0	2	0	15	5067	0	0	0	0	0	0	0	0	0	0	20	502	0	2036	0	19419	Bacteria	Firmicutes	Erysipelotrichia	Erysipelotrichales	Erysipelotrichaceae
Dialister	0	8	627	129	4	2533	10	0	0	698	1803	0	0	2003	975	0	1054	1255	373	0	0	0	802	1467	0	1317	6	0	2	1905	38	0	0	313	217	26	551	0	939	0	19055	Bacteria	Firmicutes	Negativicutes	Selenomonadales	Veillonellaceae
Haemophilus	0	1312	5835	30	3	27	4	15	278	25	29	0	3	9	870	0	15	8	422	30	396	0	0	668	137	2	99	66	2404	30	0	20	67	7	0	4750	145	75	27	236	18044	Bacteria	Proteobacteria	Gammaproteobacteria	Pasteurellales	Pasteurellaceae
Butyricicoccus	382	116	36	372	418	351	448	978	109	70	248	250	12	180	332	155	443	92	31	989	347	711	602	826	501	128	1002	2495	265	509	226	208	15	251	1075	554	379	48	298	1038	17490	Bacteria	Firmicutes	Clostridia	Clostridiales	Ruminococcaceae
Parabacteroides	708	511	6	112	37	535	520	475	352	541	649	700	325	318	225	1624	785	990	96	150	24	713	0	169	25	460	36	10	2	68	1	866	21	1723	0	37	316	268	456	585	15439	Bacteria	Bacteroidetes	Bacteroidia	Bacteroidales	Porphyromonadaceae
Anaerostipes	475	19	150	386	673	65	1072	1075	363	161	241	272	128	99	198	162	278	41	270	416	139	293	236	98	406	58	573	690	791	640	472	259	1408	220	602	273	30	385	71	564	14752	Bacteria	Firmicutes	Clostridia	Clostridiales	Lachnospiraceae
Akkermansia	0	2	0	0	0	178	4	0	1024	0	894	0	688	0	57	67	0	1	75	0	0	0	0	0	0	521	0	0	688	0	485	0	0	53	0	0	0	85	8348	0	13170	Bacteria	Verrucomicrobia	Verrucomicrobiae	Verrucomicrobiales	Verrucomicrobiaceae
Eubacterium	49	1105	0	827	1557	3	15	2	303	487	211	171	662	109	202	268	8	174	0	902	2	1	5	1101	438	7	19	0	87	1150	64	234	0	685	0	1	189	533	120	480	12171	Bacteria	Firmicutes	Clostridia	Clostridiales	Eubacteriaceae
Clostridium_IV	52	80	13	546	333	75	1022	140	246	413	219	40	308	2022	50	61	38	82	242	25	418	39	14	601	52	223	2544	24	47	321	20	36	0	82	65	71	90	61	899	1	11615	Bacteria	Firmicutes	Clostridia	Clostridiales	Ruminococcaceae
Prevotella	0	1594	0	48	10	396	267	0	0	10	58	0	80	9	101	1710	0	1411	14	0	14	0	9	1015	0	1177	1369	0	0	10	0	0	0	113	4	0	1152	0	765	8	11344	Bacteria	Bacteroidetes	Bacteroidia	Bacteroidales	Prevotellaceae
Megamonas	17	16	0	35	0	7	7	0	2	4	398	0	43	0	2	0	0	591	0	0	6	2852	0	6720	0	0	13	0	0	0	12	2	0	0	221	0	54	80	0	0	11082	Bacteria	Firmicutes	Negativicutes	Selenomonadales	Veillonellaceae
Lactobacillus	157	0	792	143	46	52	88	13	7	59	0	17	50	476	7	18	48	37	36	15	3	300	5362	71	12	2	1520	5	79	26	91	0	0	2	460	6	104	4	0	1	10109	Bacteria	Firmicutes	Bacilli	Lactobacillales	Lactobacillaceae
Barnesiella	0	21	0	0	94	39	992	0	0	2	177	391	264	251	0	76	717	1036	0	0	0	0	0	0	8	157	233	0	0	1	0	588	0	0	0	0	457	280	1943	0	7727	Bacteria	Bacteroidetes	Bacteroidia	Bacteroidales	Porphyromonadaceae
Clostridium_XlVa	464	183	410	22	24	59	10	189	52	43	216	63	9	43	353	311	6	145	122	213	110	704	292	255	52	16	16	699	16	191	20	137	191	310	22	89	94	70	29	704	6954	Bacteria	Firmicutes	Clostridia	Clostridiales	Lachnospiraceae
Oscillibacter	119	61	0	15	0	39	473	233	24	243	187	147	1992	188	36	205	148	194	0	27	15	13	0	53	0	67	64	0	0	18	2	229	0	175	0	0	72	69	1199	62	6369	Bacteria	Firmicutes	Clostridia	Clostridiales	Ruminococcaceae
Phascolarctobacterium	1005	183	0	86	21	2	27	33	20	0	33	290	165	46	284	1610	4	60	0	3	0	1316	0	78	0	0	3	19	11	0	0	246	0	327	0	1	6	39	312	17	6247	Bacteria	Firmicutes	Negativicutes	Selenomonadales	Acidaminococcaceae
Parasutterella	361	603	476	7	383	0	0	0	29	0	25	0	0	0	3	8	17	0	17	169	517	654	134	1657	255	2	0	0	21	0	0	0	4	0	34	10	11	0	1	546	5944	Bacteria	Proteobacteria	Betaproteobacteria	Burkholderiales	Sutterellaceae
Fusobacterium	1076	0	23	0	0	0	0	0	0	13	0	0	0	0	0	0	0	0	3668	0	0	1027	0	0	0	0	0	4	4	0	0	0	15	1	10	3	0	13	0	0	5857	Bacteria	Fusobacteria	Fusobacteriia	Fusobacteriales	Fusobacteriaceae
Anaerobacterium	0	1882	4	115	0	357	5	0	0	0	863	0	444	22	0	0	0	302	0	0	0	0	0	8	0	227	0	0	0	0	3	0	0	0	0	7	137	57	1415	0	5848	Bacteria	Firmicutes	Clostridia	Clostridiales	Ruminococcaceae
Clostridium_sensu_stricto	5	24	2023	57	0	131	0	32	330	372	0	227	39	175	97	4	39	0	288	0	3	0	419	207	237	43	0	0	20	46	302	267	120	31	114	12	0	17	0	0	5681	Bacteria	Firmicutes	Clostridia	Clostridiales	Clostridiaceae_1
Klebsiella	0	16	44	46	44	0	0	6	0	19	0	0	18	4	14	21	50	413	0	0	0	0	392	210	213	9	0	2030	31	90	84	0	0	147	25	235	1118	0	0	0	5279	Bacteria	Proteobacteria	Gammaproteobacteria	Enterobacteriales	Enterobacteriaceae
Clostridium_XlVb	423	69	9	23	6	0	4	131	50	13	36	61	146	115	16	21	49	15	0	569	156	189	6	89	0	0	0	69	21	5	0	93	347	62	920	91	61	44	505	347	4761	Bacteria	Firmicutes	Clostridia	Clostridiales	Lachnospiraceae
Intestinibacter	86	0	429	127	7	646	216	30	0	227	13	283	73	37	104	0	24	79	164	0	0	17	33	43	36	278	4	0	8	266	196	11	0	34	146	0	6	0	9	13	3645	Bacteria	Firmicutes	Clostridia	Clostridiales	Peptostreptococcaceae
Terrisporobacter	21	10	2229	205	0	0	101	0	0	78	9	62	127	6	33	26	96	31	0	0	0	0	35	127	0	0	0	35	13	73	121	40	8	0	11	11	13	10	30	0	3561	Bacteria	Firmicutes	Clostridia	Clostridiales	Peptostreptococcaceae
Weissella	0	5	7	0	0	4	0	0	9	17	0	0	2	0	0	0	19	0	0	0	0	3	4	356	9	2	0	4	10	14	1567	10	148	517	43	10	0	75	0	0	2835	Bacteria	Firmicutes	Bacilli	Lactobacillales	Leuconostocaceae
Sporobacter	0	9	0	88	0	57	252	13	5	916	61	4	62	291	4	14	57	112	0	0	109	0	0	158	0	31	16	0	0	0	0	36	0	28	0	0	43	149	312	0	2827	Bacteria	Firmicutes	Clostridia	Clostridiales	Ruminococcaceae
Veillonella	22	17	1009	0	0	2	0	4	2	40	0	1	0	30	24	11	46	43	18	19	50	15	144	1	27	0	0	53	16	119	0	3	254	28	0	177	51	0	10	16	2252	Bacteria	Firmicutes	Negativicutes	Selenomonadales	Veillonellaceae
Desulfovibrio	480	147	0	0	2	0	67	0	0	0	0	219	17	0	7	18	0	0	0	0	0	395	0	0	2	0	7	0	0	0	0	742	0	3	0	0	0	0	5	0	2111	Bacteria	Proteobacteria	Deltaproteobacteria	Desulfovibrionales	Desulfovibrionaceae
Megasphaera	0	11	0	57	0	0	0	0	0	0	74	0	0	0	0	0	0	158	2	0	0	6	0	164	0	0	0	0	35	0	1550	0	0	0	0	0	42	0	0	0	2099	Bacteria	Firmicutes	Negativicutes	Selenomonadales	Veillonellaceae
Paraprevotella	0	91	0	5	0	46	277	0	0	0	0	0	481	1009	0	0	0	0	0	0	0	0	0	60	0	23	24	0	0	0	0	0	0	0	0	0	0	70	4	0	2090	Bacteria	Bacteroidetes	Bacteroidia	Bacteroidales	Prevotellaceae
Turicibacter	17	4	57	34	3	3	8	75	6	72	0	35	5	53	83	27	131	22	0	0	6	5	435	29	275	0	14	7	51	26	240	28	67	31	58	12	15	6	87	0	2027	Bacteria	Firmicutes	Erysipelotrichia	Erysipelotrichales	Erysipelotrichaceae
Anaerovorax	138	18	0	87	48	96	68	41	3	71	48	33	174	85	94	7	44	24	0	18	24	111	2	39	28	121	133	3	9	79	8	9	0	79	2	3	19	149	90	9	2014	Bacteria	Firmicutes	Clostridia	Clostridiales	Clostridiales_Incertae_Sedis_XIII
Lactococcus	0	0	0	0	0	0	0	0	5	0	0	0	0	0	34	0	1	0	0	0	0	16	0	0	4	0	0	0	22	0	17	0	5	625	0	1118	92	1	17	0	1957	Bacteria	Firmicutes	Bacilli	Lactobacillales	Streptococcaceae
Catenibacterium	0	826	0	0	1	0	0	0	0	0	0	0	0	0	0	539	0	0	0	0	0	0	0	9	0	0	0	0	0	0	0	0	0	0	0	5	0	0	491	0	1871	Bacteria	Firmicutes	Erysipelotrichia	Erysipelotrichales	Erysipelotrichaceae
Odoribacter	0	194	0	32	5	30	187	0	225	2	148	63	66	84	22	37	112	173	0	113	0	0	0	0	0	21	14	0	0	0	0	110	0	28	0	0	44	16	15	59	1800	Bacteria	Bacteroidetes	Bacteroidia	Bacteroidales	Porphyromonadaceae
Flavonifractor	296	0	0	0	19	22	0	367	0	16	6	10	15	0	12	0	15	11	164	0	7	440	0	0	0	5	0	0	0	7	0	11	0	39	16	0	0	0	133	0	1611	Bacteria	Firmicutes	Clostridia	Clostridiales	Ruminococcaceae
Intestinimonas	0	18	0	66	48	127	6	128	23	137	63	2	101	53	124	0	186	10	0	21	0	0	0	15	29	113	12	6	12	102	6	0	0	82	0	0	20	42	25	0	1577	Bacteria	Firmicutes	Clostridia	Clostridiales	Ruminococcaceae
Butyricimonas	0	79	0	16	0	0	2	149	31	0	112	64	14	11	0	185	218	178	0	24	0	0	0	2	0	0	0	0	0	0	0	62	0	3	0	0	38	0	22	31	1241	Bacteria	Bacteroidetes	Bacteroidia	Bacteroidales	Porphyromonadaceae
Leuconostoc	0	0	0	3	0	0	0	0	0	0	0	2	0	0	9	2	2	0	0	0	0	2	4	0	3	0	0	114	5	0	0	0	0	1081	7	0	0	3	0	0	1237	Bacteria	Firmicutes	Bacilli	Lactobacillales	Leuconostocaceae
Adlercreutzia	0	19	0	0	0	285	0	0	0	0	36	0	340	0	252	0	0	0	0	0	0	0	0	0	0	105	0	0	0	0	7	24	0	66	0	0	0	0	0	0	1134	Bacteria	Actinobacteria	Actinobacteria	Coriobacteriales	Coriobacteriaceae
Enterococcus	10	11	0	0	0	0	3	8	2	0	0	0	0	211	0	0	0	0	4	0	0	0	0	0	0	2	0	0	0	0	25	0	0	759	0	26	0	0	46	0	1107	Bacteria	Firmicutes	Bacilli	Lactobacillales	Enterococcaceae
Coprobacter	0	22	0	0	0	0	0	0	12	0	9	113	68	349	0	40	21	379	0	0	0	0	0	0	0	0	0	0	0	0	0	59	0	0	0	0	0	4	10	0	1086	Bacteria	Bacteroidetes	Bacteroidia	Bacteroidales	Porphyromonadaceae
Eggerthella	68	0	0	11	31	0	0	113	57	11	12	15	46	0	19	60	6	0	19	20	78	33	0	4	18	0	0	189	25	3	0	42	15	6	76	0	0	96	0	10	1083	Bacteria	Actinobacteria	Actinobacteria	Coriobacteriales	Coriobacteriaceae
Actinomyces	17	0	0	19	24	12	1	11	4	49	0	4	27	6	21	0	22	3	3	0	34	13	11	66	90	5	42	55	45	40	31	5	17	8	82	44	12	14	0	5	842	Bacteria	Actinobacteria	Actinobacteria	Actinomycetales	Actinomycetaceae
Enterobacter	0	50	175	0	0	0	0	0	8	0	0	0	0	0	27	0	0	0	0	0	0	0	8	0	65	0	0	0	67	23	13	0	0	44	0	155	145	0	0	17	797	Bacteria	Proteobacteria	Gammaproteobacteria	Enterobacteriales	Enterobacteriaceae
Allisonella	59	0	0	82	0	0	0	51	0	147	63	49	0	0	0	0	0	22	0	0	0	170	0	27	0	0	0	36	0	10	0	13	0	0	0	0	22	0	0	0	751	Bacteria	Firmicutes	Negativicutes	Selenomonadales	Veillonellaceae
Citrobacter	0	0	6	0	2	0	0	0	0	0	0	0	0	8	362	0	0	0	27	22	0	0	8	0	53	0	0	0	0	0	29	0	98	0	0	22	86	0	0	0	723	Bacteria	Proteobacteria	Gammaproteobacteria	Enterobacteriales	Enterobacteriaceae
Bilophila	34	5	3	0	0	5	17	9	28	15	23	11	0	0	2	75	0	90	88	0	0	83	3	30	6	4	0	0	17	15	0	42	0	0	0	0	24	13	74	0	716	Bacteria	Proteobacteria	Deltaproteobacteria	Desulfovibrionales	Desulfovibrionaceae
Erysipelotrichaceae_incertae_sedis	31	0	0	22	2	8	0	29	0	42	0	0	0	0	213	0	1	0	30	0	3	62	22	0	0	0	0	0	0	5	0	2	15	39	59	5	0	29	0	0	619	Bacteria	Firmicutes	Erysipelotrichia	Erysipelotrichales	Erysipelotrichaceae
Vampirovibrio	0	6	0	0	0	0	0	0	0	0	0	0	120	0	0	0	0	184	0	0	0	0	0	0	0	8	0	0	0	0	0	0	0	0	0	2	160	0	69	0	549	Bacteria	Proteobacteria	Deltaproteobacteria	Bdellovibrionales	Bdellovibrionaceae
Senegalimassilia	0	0	0	43	0	0	0	0	0	0	0	0	0	81	0	0	0	56	0	0	0	0	0	51	0	0	0	0	0	0	0	0	0	0	0	0	178	0	72	0	481	Bacteria	Actinobacteria	Actinobacteria	Coriobacteriales	Coriobacteriaceae
Sutterella	0	0	0	0	0	1	36	12	0	197	0	0	19	18	0	0	0	36	0	0	0	0	0	0	0	0	0	0	0	123	0	6	0	0	0	0	0	6	6	0	460	Bacteria	Proteobacteria	Betaproteobacteria	Burkholderiales	Sutterellaceae
Granulicatella	7	21	7	9	31	9	0	0	0	8	5	0	8	0	26	6	0	0	11	0	10	0	14	13	23	0	30	5	44	40	16	4	10	6	23	7	21	8	0	0	422	Bacteria	Firmicutes	Bacilli	Lactobacillales	Carnobacteriaceae
Gemella	19	1	8	19	7	10	0	0	11	7	0	0	14	0	23	3	0	0	2	0	4	8	47	11	11	7	50	9	27	30	20	4	11	4	28	3	8	8	2	0	416	Bacteria	Firmicutes	Bacilli	Bacillales	Bacillales_Incertae_Sedis_XI
Christensenella	0	0	0	7	0	0	112	0	10	5	0	14	116	3	13	23	12	15	0	0	0	0	0	4	0	2	0	0	0	0	0	29	0	0	0	0	7	0	21	0	393	Bacteria	Firmicutes	Clostridia	Clostridiales	Christensenellaceae
Catabacter	0	12	0	3	6	18	147	15	0	6	0	9	0	11	0	31	7	4	0	0	0	0	0	0	2	2	24	0	0	5	0	1	0	0	0	0	0	23	36	0	362	Bacteria	Firmicutes	Clostridia	Clostridiales	Catabacteriaceae
Porphyromonas	1	0	0	0	0	0	0	0	6	36	189	0	10	17	0	0	0	0	0	0	2	5	7	0	0	0	0	14	0	0	0	0	0	0	0	0	0	0	0	0	287	Bacteria	Bacteroidetes	Bacteroidia	Bacteroidales	Porphyromonadaceae
Bulleidia	0	282	0	0	0	0	0	0	0	0	0	0	0	0	0	0	0	0	0	0	0	0	0	0	0	0	0	0	0	0	0	0	0	0	0	0	0	0	0	0	282	Bacteria	Firmicutes	Erysipelotrichia	Erysipelotrichales	Erysipelotrichaceae
Peptococcus	0	36	0	0	0	3	2	0	0	0	0	3	0	224	0	0	0	6	0	0	0	0	0	0	0	0	0	0	0	0	0	0	0	0	0	0	0	0	6	0	280	Bacteria	Firmicutes	Clostridia	Clostridiales	Peptococcaceae_1
Saccharibacteria_genera_incertae_sedis	11	0	0	0	3	1	0	0	0	1	4	0	3	0	2	0	1	0	0	6	12	2	3	6	23	0	34	60	20	8	21	0	2	0	22	2	1	5	0	0	253	Bacteria	Candidatus_Saccharibacteria	No_Rank	No_Rank	No_Rank
Raoultella	0	0	0	0	5	0	0	0	0	0	0	0	0	0	54	0	0	0	0	0	0	0	0	0	0	0	0	0	0	0	0	0	0	179	0	0	0	0	0	0	238	Bacteria	Proteobacteria	Gammaproteobacteria	Enterobacteriales	Enterobacteriaceae
Hungatella	20	0	0	0	0	0	0	14	0	125	0	0	0	4	0	0	0	0	30	0	0	9	0	0	0	0	0	0	0	5	0	0	0	0	0	0	0	0	0	0	207	Bacteria	Firmicutes	Clostridia	Clostridiales	Lachnospiraceae
Aestuariispira	0	0	0	0	0	0	0	0	0	0	46	0	70	0	0	0	0	0	0	0	0	0	0	0	0	0	0	0	0	0	0	0	0	0	0	0	0	71	3	0	190	Bacteria	Proteobacteria	Alphaproteobacteria	Rhodospirillales	Rhodospirillaceae
Anaerotruncus	62	0	0	0	2	3	0	24	3	10	0	10	0	2	5	0	0	0	0	0	0	20	0	0	0	0	0	0	0	6	0	3	0	5	0	0	0	0	2	0	157	Bacteria	Firmicutes	Clostridia	Clostridiales	Ruminococcaceae
Alloprevotella	0	0	0	0	0	0	41	0	0	0	0	0	0	0	0	0	0	0	0	0	0	0	0	3	0	0	101	0	0	0	0	0	0	0	0	0	6	0	0	0	151	Bacteria	Bacteroidetes	Bacteroidia	Bacteroidales	Prevotellaceae
Staphylococcus	6	0	0	0	2	0	0	0	0	0	0	0	0	0	2	0	0	0	0	0	0	0	0	0	2	0	0	0	0	0	5	0	5	0	125	0	0	1	0	0	148	Bacteria	Firmicutes	Bacilli	Bacillales	Staphylococcaceae
Holdemania	30	5	0	8	2	2	0	13	0	7	0	0	11	2	17	9	0	0	0	0	0	9	0	12	4	0	0	0	0	0	0	0	7	6	0	0	0	0	0	0	144	Bacteria	Firmicutes	Erysipelotrichia	Erysipelotrichales	Erysipelotrichaceae
Oxalobacter	0	4	0	0	0	0	0	0	0	0	0	12	24	6	59	2	0	5	0	0	6	0	0	0	0	0	0	0	0	0	0	9	0	0	0	0	3	0	8	0	138	Bacteria	Proteobacteria	Betaproteobacteria	Burkholderiales	Oxalobacteraceae
Gordonibacter	2	0	0	7	6	12	22	0	12	3	0	0	7	0	7	0	6	0	0	0	0	7	0	0	0	3	24	0	6	0	0	0	0	0	0	0	0	10	4	0	138	Bacteria	Actinobacteria	Actinobacteria	Coriobacteriales	Coriobacteriaceae
Faecalicoccus	0	0	0	0	0	0	0	0	0	0	19	0	0	39	0	0	0	0	0	0	0	0	0	0	0	0	0	0	0	0	67	0	0	0	0	0	0	0	0	0	125	Bacteria	Firmicutes	Erysipelotrichia	Erysipelotrichales	Erysipelotrichaceae
Papillibacter	0	11	0	0	8	0	5	0	0	0	0	0	9	0	0	0	3	5	0	20	0	0	0	0	0	0	0	0	0	0	0	0	0	0	0	0	0	0	30	13	104	Bacteria	Firmicutes	Clostridia	Clostridiales	Ruminococcaceae
Solobacterium	0	0	0	0	12	0	0	0	2	6	2	0	0	0	3	0	0	0	0	0	13	5	16	0	0	0	4	0	8	7	1	0	0	0	7	6	0	0	0	3	95	Bacteria	Firmicutes	Erysipelotrichia	Erysipelotrichales	Erysipelotrichaceae
Howardella	0	20	0	0	0	0	0	0	0	0	0	0	0	0	0	27	0	0	0	0	0	0	0	0	0	0	0	0	0	0	0	0	0	0	0	0	0	17	29	0	93	Bacteria	Firmicutes	Clostridia	Clostridiales	Lachnospiraceae
Coprobacillus	5	0	0	0	0	14	0	3	0	0	0	0	5	10	0	0	0	7	0	0	0	0	0	0	0	1	0	0	0	0	0	0	0	0	0	29	0	0	6	0	80	Bacteria	Firmicutes	Erysipelotrichia	Erysipelotrichales	Erysipelotrichaceae
Parvimonas	0	0	0	0	0	0	2	0	2	0	0	0	0	0	0	0	0	11	0	0	0	0	22	0	0	2	11	2	0	0	0	0	0	0	5	0	0	0	0	0	57	Bacteria	Firmicutes	Clostridia	Clostridiales	Clostridiales_Incertae_Sedis_XI
Slackia	0	0	0	24	0	5	0	0	0	0	0	0	0	0	0	0	0	0	0	0	0	0	0	11	0	7	0	0	0	0	0	0	0	0	0	0	0	0	7	0	54	Bacteria	Actinobacteria	Actinobacteria	Coriobacteriales	Coriobacteriaceae
Peptostreptococcus	7	0	0	0	3	0	0	0	0	0	0	0	0	1	0	0	0	0	0	0	0	5	8	0	0	0	0	0	0	0	10	0	10	0	10	0	0	0	0	0	54	Bacteria	Firmicutes	Clostridia	Clostridiales	Peptostreptococcaceae
Providencia	0	0	54	0	0	0	0	0	0	0	0	0	0	0	0	0	0	0	0	0	0	0	0	0	0	0	0	0	0	0	0	0	0	0	0	0	0	0	0	0	54	Bacteria	Proteobacteria	Gammaproteobacteria	Enterobacteriales	Enterobacteriaceae
Pyramidobacter	0	0	0	0	0	0	6	0	0	0	11	0	0	4	0	17	0	7	0	0	0	0	0	0	0	0	0	0	0	0	0	0	0	0	0	0	8	0	0	0	53	Bacteria	Synergistetes	Synergistia	Synergistales	Synergistaceae
Corynebacterium	0	0	2	8	0	0	0	0	0	0	0	0	0	0	4	0	0	0	0	0	0	1	2	4	0	0	0	0	3	0	7	0	4	0	4	0	10	0	0	0	49	Bacteria	Actinobacteria	Actinobacteria	Actinomycetales	Corynebacteriaceae
Rothia	0	18	0	0	0	0	0	0	0	0	0	0	3	0	0	0	0	0	0	0	0	0	0	0	4	0	0	0	5	2	1	0	2	0	0	7	5	0	0	0	47	Bacteria	Actinobacteria	Actinobacteria	Actinomycetales	Micrococcaceae
Streptophyta	15	0	0	4	0	0	5	0	0	0	0	0	3	0	0	0	0	0	0	0	0	0	1	1	0	10	3	0	0	2	0	0	0	0	0	0	0	0	0	0	44	Bacteria	Cyanobacteria/Chloroplast	Chloroplast	No_Rank	Chloroplast
Anaerofilum	0	0	0	4	0	0	0	4	0	0	0	0	6	4	6	10	2	0	0	0	0	0	0	0	0	0	0	0	0	0	0	2	0	0	0	0	0	4	0	0	42	Bacteria	Firmicutes	Clostridia	Clostridiales	Ruminococcaceae
Peptoniphilus	1	0	0	0	0	0	0	0	0	16	8	0	0	0	0	1	0	0	7	0	0	0	2	0	0	0	0	0	0	0	0	0	1	0	0	0	0	2	0	0	38	Bacteria	Firmicutes	Clostridia	Clostridiales	Peptoniphilaceae
Cellulosilyticum	0	0	0	0	0	25	0	0	0	0	0	0	0	0	0	0	0	0	0	0	0	0	0	0	0	9	0	0	0	0	0	0	0	0	0	0	0	0	0	0	34	Bacteria	Firmicutes	Clostridia	Clostridiales	Lachnospiraceae
Mitsuokella	0	10	0	0	0	0	0	0	0	0	0	0	0	0	0	0	0	0	0	0	0	0	0	0	0	0	0	0	0	0	0	0	0	0	0	0	0	0	24	0	34	Bacteria	Firmicutes	Negativicutes	Selenomonadales	Veillonellaceae
Atopobium	0	0	0	0	3	0	0	0	0	8	0	0	0	0	0	0	0	0	0	0	0	2	3	5	2	0	0	2	0	5	0	0	0	0	0	3	0	0	0	0	33	Bacteria	Actinobacteria	Actinobacteria	Coriobacteriales	Coriobacteriaceae
Plesiomonas	0	0	0	0	0	25	0	0	0	0	0	0	0	0	0	0	0	0	8	0	0	0	0	0	0	0	0	0	0	0	0	0	0	0	0	0	0	0	0	0	33	Bacteria	Proteobacteria	Gammaproteobacteria	Enterobacteriales	Enterobacteriaceae
Eisenbergiella	0	0	0	0	0	24	0	0	0	0	0	0	0	0	0	0	0	0	0	0	0	0	0	0	0	6	0	0	0	0	0	0	0	0	0	0	0	0	0	0	30	Bacteria	Firmicutes	Clostridia	Clostridiales	Lachnospiraceae
Acidaminococcus	0	16	0	0	0	0	0	0	0	0	9	0	0	0	0	0	0	0	0	0	0	0	0	0	0	0	0	0	0	0	0	0	0	0	0	0	0	0	0	0	25	Bacteria	Firmicutes	Negativicutes	Selenomonadales	Acidaminococcaceae
Morganella	0	0	0	0	0	0	0	0	0	0	0	0	0	0	0	2	0	0	0	0	0	0	0	0	0	0	0	10	0	0	0	0	13	0	0	0	0	0	0	0	25	Bacteria	Proteobacteria	Gammaproteobacteria	Enterobacteriales	Enterobacteriaceae
Olsenella	0	0	0	0	0	0	0	0	0	0	0	0	0	7	5	0	0	0	0	0	0	0	0	0	0	0	0	0	0	0	9	0	0	0	2	0	0	0	0	0	23	Bacteria	Actinobacteria	Actinobacteria	Coriobacteriales	Coriobacteriaceae
Aggregatibacter	0	20	0	0	0	0	0	0	0	0	0	0	0	2	0	0	0	0	0	0	0	0	0	0	0	0	0	0	0	0	0	0	0	0	0	0	0	0	0	0	22	Bacteria	Proteobacteria	Gammaproteobacteria	Pasteurellales	Pasteurellaceae
Pediococcus	0	0	6	0	0	0	0	0	0	0	0	0	0	0	0	0	0	0	0	0	0	0	0	0	0	0	0	16	0	0	0	0	0	0	0	0	0	0	0	0	22	Bacteria	Firmicutes	Bacilli	Lactobacillales	Lactobacillaceae
Okibacterium	5	0	0	0	0	0	0	0	0	0	0	0	0	0	0	0	0	0	0	0	0	0	0	0	0	0	0	17	0	0	0	0	0	0	0	0	0	0	0	0	22	Bacteria	Actinobacteria	Actinobacteria	Actinomycetales	Microbacteriaceae
Cloacibacillus	0	0	0	0	0	0	0	0	0	0	0	0	0	0	0	0	0	0	0	0	0	0	0	0	0	0	0	0	0	0	0	0	0	0	0	0	0	0	21	0	21	Bacteria	Synergistetes	Synergistia	Synergistales	Synergistaceae
Acetanaerobacterium	0	0	0	0	0	0	0	0	0	0	0	0	0	15	0	0	0	0	0	0	0	0	0	0	0	4	0	0	0	0	0	0	0	0	0	0	0	0	0	0	19	Bacteria	Firmicutes	Clostridia	Clostridiales	Ruminococcaceae
Lactonifactor	0	0	0	0	0	0	0	0	0	0	0	0	0	0	10	0	0	0	0	0	0	0	0	0	0	0	0	0	0	0	0	0	0	8	0	0	0	0	0	0	18	Bacteria	Firmicutes	Clostridia	Clostridiales	Lachnospiraceae
Acetivibrio	0	0	0	0	0	0	0	0	0	0	17	0	0	0	0	0	0	0	0	0	0	0	0	0	0	0	0	0	0	0	0	0	0	0	0	0	0	0	0	0	17	Bacteria	Firmicutes	Clostridia	Clostridiales	Ruminococcaceae
Finegoldia	0	0	0	0	0	2	0	0	0	7	3	0	0	0	0	0	0	0	4	0	0	0	0	0	0	0	0	0	0	0	0	0	0	0	0	0	0	0	0	0	16	Bacteria	Firmicutes	Clostridia	Clostridiales	Clostridiales_Incertae_Sedis_XI
Burkholderia	0	0	0	0	0	0	0	0	0	0	0	0	6	0	0	0	0	0	0	0	0	0	2	0	0	0	0	0	0	0	0	0	0	0	3	0	5	0	0	0	16	Bacteria	Proteobacteria	Betaproteobacteria	Burkholderiales	Burkholderiaceae
Anaeroplasma	0	0	0	0	0	0	0	0	0	0	0	0	0	0	0	0	0	0	0	0	0	0	0	0	0	0	0	0	0	0	0	0	0	0	0	0	0	0	15	0	15	Bacteria	Tenericutes	Mollicutes	Anaeroplasmatales	Anaeroplasmataceae
Anaerococcus	0	0	0	0	2	0	0	1	0	0	7	0	0	1	0	4	0	0	0	0	0	0	0	0	0	0	0	0	0	0	0	0	0	0	0	0	0	0	0	0	15	Bacteria	Firmicutes	Clostridia	Clostridiales	Clostridiales_Incertae_Sedis_XI
Anaerofustis	0	0	0	0	0	0	0	2	0	0	0	0	0	0	2	0	0	0	0	0	0	0	0	0	0	3	0	0	0	0	0	0	0	8	0	0	0	0	0	0	15	Bacteria	Firmicutes	Clostridia	Clostridiales	Eubacteriaceae
Ralstonia	0	0	0	0	0	0	0	1	0	0	0	0	1	0	0	0	0	0	1	0	0	0	0	0	4	0	0	3	0	0	0	0	0	0	4	0	0	0	0	0	14	Bacteria	Proteobacteria	Betaproteobacteria	Burkholderiales	Burkholderiaceae
Delftia	0	0	0	3	0	0	0	0	0	0	0	0	0	0	0	0	0	0	0	0	0	0	0	0	3	0	0	0	0	0	0	0	0	4	0	3	0	0	0	0	13	Bacteria	Proteobacteria	Betaproteobacteria	Burkholderiales	Comamonadaceae
Ezakiella	0	0	0	0	0	0	0	0	0	0	10	0	2	0	0	0	0	0	0	0	0	0	0	0	0	0	0	0	0	0	0	0	0	0	0	0	0	0	0	0	12	Bacteria	Firmicutes	Clostridia	Clostridiales	Clostridiales_Incertae_Sedis_XI
Abiotrophia	0	0	0	0	0	0	0	0	0	0	0	0	0	0	0	0	0	0	0	0	0	0	0	11	0	0	0	0	0	0	0	0	1	0	0	0	0	0	0	0	12	Bacteria	Firmicutes	Bacilli	Lactobacillales	Aerococcaceae
Pseudomonas	0	0	0	0	0	1	0	0	0	0	0	2	0	0	0	0	0	0	0	0	0	0	2	0	0	0	0	0	0	0	0	0	0	0	0	5	0	0	0	0	10	Bacteria	Proteobacteria	Gammaproteobacteria	Pseudomonadales	Pseudomonadaceae
Parvibacter	0	0	0	0	0	0	0	0	0	0	0	0	0	0	3	0	0	0	0	0	0	0	0	0	0	0	0	0	0	0	0	0	0	0	0	0	6	0	0	0	9	Bacteria	Actinobacteria	Actinobacteria	Coriobacteriales	Coriobacteriaceae
Helicobacter	0	0	0	0	0	0	0	0	0	0	0	0	0	0	0	0	0	0	0	0	3	0	0	0	0	0	0	0	0	0	0	0	0	0	0	0	0	0	6	0	9	Bacteria	Proteobacteria	Epsilonproteobacteria	Campylobacterales	Helicobacteraceae
Neisseria	0	9	0	0	0	0	0	0	0	0	0	0	0	0	0	0	0	0	0	0	0	0	0	0	0	0	0	0	0	0	0	0	0	0	0	0	0	0	0	0	9	Bacteria	Proteobacteria	Betaproteobacteria	Neisseriales	Neisseriaceae
Victivallis	0	0	0	0	0	0	0	0	0	0	0	0	0	0	0	0	0	0	0	0	0	0	0	0	0	0	0	0	0	0	0	0	0	0	0	0	0	0	9	0	9	Bacteria	Lentisphaerae	Lentisphaeria	Victivallales	Victivallaceae
Butyrivibrio	0	0	0	0	0	0	8	0	0	0	0	0	0	0	0	0	0	0	0	0	0	0	0	0	0	0	0	0	0	0	0	0	0	0	0	0	0	0	0	0	8	Bacteria	Firmicutes	Clostridia	Clostridiales	Lachnospiraceae
Cetobacterium	0	0	4	0	4	0	0	0	0	0	0	0	0	0	0	0	0	0	0	0	0	0	0	0	0	0	0	0	0	0	0	0	0	0	0	0	0	0	0	0	8	Bacteria	Fusobacteria	Fusobacteriia	Fusobacteriales	Fusobacteriaceae
Paraeggerthella	0	0	0	0	0	0	0	0	0	0	0	0	0	0	0	0	0	0	6	0	0	0	0	0	0	0	0	0	0	0	0	0	0	0	0	0	0	0	0	0	6	Bacteria	Actinobacteria	Actinobacteria	Coriobacteriales	Coriobacteriaceae
Campylobacter	0	0	0	0	0	0	0	0	0	0	0	0	0	0	0	0	0	0	6	0	0	0	0	0	0	0	0	0	0	0	0	0	0	0	0	0	0	0	0	0	6	Bacteria	Proteobacteria	Epsilonproteobacteria	Campylobacterales	Campylobacteraceae
Varibaculum	0	0	0	0	0	0	0	0	0	6	0	0	0	0	0	0	0	0	0	0	0	0	0	0	0	0	0	0	0	0	0	0	0	0	0	0	0	0	0	0	6	Bacteria	Actinobacteria	Actinobacteria	Actinomycetales	Actinomycetaceae
Gardnerella	0	0	0	0	0	0	0	0	0	4	0	0	0	0	0	0	0	0	0	0	0	0	0	0	0	0	0	0	0	0	0	0	0	0	0	0	0	0	1	0	5	Bacteria	Actinobacteria	Actinobacteria	Bifidobacteriales	Bifidobacteriaceae
Mogibacterium	0	0	0	0	0	0	0	0	0	0	0	0	0	0	0	0	0	0	0	0	0	1	0	0	0	0	0	4	0	0	0	0	0	0	0	0	0	0	0	0	5	Bacteria	Firmicutes	Clostridia	Clostridiales	Clostridiales_Incertae_Sedis_XIII
Enhydrobacter	0	0	0	0	0	0	0	0	0	0	0	0	0	0	0	0	0	0	0	0	0	0	0	0	0	5	0	0	0	0	0	0	0	0	0	0	0	0	0	0	5	Bacteria	Proteobacteria	Gammaproteobacteria	Pseudomonadales	Moraxellaceae
Scardovia	0	0	0	0	0	0	0	0	0	0	0	0	0	0	0	0	0	0	0	0	0	0	0	0	0	0	0	5	0	0	0	0	0	0	0	0	0	0	0	0	5	Bacteria	Actinobacteria	Actinobacteria	Bifidobacteriales	Bifidobacteriaceae
Parcubacteria_genera_incertae_sedis	0	0	0	0	0	0	0	0	0	0	0	0	2	0	0	0	0	0	0	0	0	0	0	0	0	0	0	0	0	0	0	0	0	0	2	0	0	0	0	0	4	Bacteria	Parcubacteria	No_Rank	No_Rank	No_Rank
Acidovorax	0	0	0	0	0	0	0	0	0	0	0	0	0	0	0	0	0	0	0	0	0	0	0	0	0	4	0	0	0	0	0	0	0	0	0	0	0	0	0	0	4	Bacteria	Proteobacteria	Betaproteobacteria	Burkholderiales	Comamonadaceae
Acinetobacter	0	0	0	0	0	0	0	0	0	0	0	0	0	0	0	0	0	0	0	0	0	0	0	0	0	1	0	0	0	0	0	0	0	0	0	0	0	3	0	0	4	Bacteria	Proteobacteria	Gammaproteobacteria	Pseudomonadales	Moraxellaceae
Comamonas	0	0	0	0	0	0	0	0	0	0	0	0	0	0	0	0	0	0	0	0	0	0	0	0	0	0	0	0	0	0	0	0	0	0	0	0	0	0	3	0	3	Bacteria	Proteobacteria	Betaproteobacteria	Burkholderiales	Comamonadaceae
Variovorax	0	0	0	0	0	0	0	0	0	0	0	0	0	0	0	0	0	0	0	0	0	0	0	0	0	0	0	0	0	0	0	0	0	0	0	0	0	3	0	0	3	Bacteria	Proteobacteria	Betaproteobacteria	Burkholderiales	Comamonadaceae
Dietzia	0	0	0	0	0	0	0	0	0	0	0	0	0	0	0	0	0	0	0	0	0	0	0	0	0	3	0	0	0	0	0	0	0	0	0	0	0	0	0	0	3	Bacteria	Actinobacteria	Actinobacteria	Actinomycetales	Dietziaceae
Anaeroglobus	3	0	0	0	0	0	0	0	0	0	0	0	0	0	0	0	0	0	0	0	0	0	0	0	0	0	0	0	0	0	0	0	0	0	0	0	0	0	0	0	3	Bacteria	Firmicutes	Negativicutes	Selenomonadales	Veillonellaceae
Cardiobacterium	0	2	0	0	0	0	0	0	0	0	0	0	0	0	0	0	0	0	0	0	0	0	0	0	0	0	0	0	0	0	0	0	0	0	0	0	0	0	0	0	2	Bacteria	Proteobacteria	Gammaproteobacteria	Cardiobacteriales	Cardiobacteriaceae
Pseudoflavonifractor	0	0	0	0	0	0	0	0	0	0	0	0	0	0	0	0	0	0	0	0	0	0	0	0	0	0	0	0	0	0	0	0	0	0	0	0	0	2	0	0	2	Bacteria	Firmicutes	Clostridia	Clostridiales	Ruminococcaceae
Murdochiella	0	0	0	0	0	0	0	0	0	0	2	0	0	0	0	0	0	0	0	0	0	0	0	0	0	0	0	0	0	0	0	0	0	0	0	0	0	0	0	0	2	Bacteria	Firmicutes	Clostridia	Clostridiales	Clostridiales_Incertae_Sedis_XI
Cupriavidus	0	0	0	0	0	0	0	0	0	0	0	0	0	0	0	0	0	0	0	0	0	0	2	0	0	0	0	0	0	0	0	0	0	0	0	0	0	0	0	0	2	Bacteria	Proteobacteria	Betaproteobacteria	Burkholderiales	Burkholderiaceae
Gp6	0	0	0	0	0	0	0	0	0	0	0	0	0	0	0	0	0	0	0	0	0	0	0	0	0	2	0	0	0	0	0	0	0	0	0	0	0	0	0	0	2	Bacteria	Acidobacteria	Acidobacteria_Gp6	No_Rank	No_Rank
Achromobacter	0	0	0	0	0	0	0	0	0	0	0	0	0	0	0	0	0	0	0	0	0	0	0	0	0	2	0	0	0	0	0	0	0	0	0	0	0	0	0	0	2	Bacteria	Proteobacteria	Betaproteobacteria	Burkholderiales	Alcaligenaceae
Rubrobacter	0	0	0	0	0	0	0	0	0	0	0	0	0	0	0	0	0	0	0	0	0	0	0	0	0	2	0	0	0	0	0	0	0	0	0	0	0	0	0	0	2	Bacteria	Actinobacteria	Actinobacteria	Rubrobacterales	Rubrobacteraceae
Flavobacterium	0	0	0	0	0	0	0	0	0	0	0	0	0	0	0	0	0	0	0	0	0	0	0	0	0	0	0	2	0	0	0	0	0	0	0	0	0	0	0	0	2	Bacteria	Bacteroidetes	Flavobacteriia	Flavobacteriales	Flavobacteriaceae
Eikenella	0	0	0	0	0	0	0	0	0	0	0	0	0	0	0	0	0	0	0	0	0	0	0	0	0	0	0	0	0	0	0	0	2	0	0	0	0	0	0	0	2	Bacteria	Proteobacteria	Betaproteobacteria	Neisseriales	Neisseriaceae
Devosia	0	0	0	0	0	0	0	0	0	0	0	0	0	0	0	0	0	0	0	0	0	0	0	0	0	0	0	0	0	0	0	0	0	0	0	0	0	2	0	0	2	Bacteria	Proteobacteria	Alphaproteobacteria	Rhizobiales	Hyphomicrobiaceae
Curtobacterium	0	0	0	0	0	0	2	0	0	0	0	0	0	0	0	0	0	0	0	0	0	0	0	0	0	0	0	0	0	0	0	0	0	0	0	0	0	0	0	0	2	Bacteria	Actinobacteria	Actinobacteria	Actinomycetales	Microbacteriaceae
Bacillus	0	0	0	0	0	0	0	0	0	0	0	0	2	0	0	0	0	0	0	0	0	0	0	0	0	0	0	0	0	0	0	0	0	0	0	0	0	0	0	0	2	Bacteria	Firmicutes	Bacilli	Bacillales	Bacillaceae_1
Stenotrophomonas	0	0	0	0	0	0	0	0	0	0	0	0	0	0	0	0	0	0	0	1	0	0	0	0	0	0	0	0	0	0	0	0	0	0	0	0	0	0	0	0	1	Bacteria	Proteobacteria	Gammaproteobacteria	Xanthomonadales	Xanthomonadaceae
Phyllobacterium	0	0	1	0	0	0	0	0	0	0	0	0	0	0	0	0	0	0	0	0	0	0	0	0	0	0	0	0	0	0	0	0	0	0	0	0	0	0	0	0	1	Bacteria	Proteobacteria	Alphaproteobacteria	Rhizobiales	Phyllobacteriaceae
Duganella	0	0	0	0	0	0	0	0	0	0	0	0	0	0	0	0	0	0	0	0	0	0	1	0	0	0	0	0	0	0	0	0	0	0	0	0	0	0	0	0	1	Bacteria	Proteobacteria	Betaproteobacteria	Burkholderiales	Oxalobacteraceae
Gp4	0	0	0	0	0	0	0	0	0	0	0	0	0	0	0	0	0	0	0	0	0	0	0	0	0	0	0	0	0	0	0	1	0	0	0	0	0	0	0	0	1	Bacteria	Acidobacteria	Acidobacteria_Gp4	No_Rank	No_Rank
Dyella	0	0	0	0	0	0	0	0	0	0	0	0	0	0	0	0	0	0	0	0	0	0	0	0	0	0	0	0	0	0	0	0	0	0	1	0	0	0	0	0	1	Bacteria	Proteobacteria	Gammaproteobacteria	Xanthomonadales	Xanthomonadaceae
Selenomonas	0	0	0	0	0	0	0	0	0	0	0	0	0	0	0	0	0	0	0	0	0	0	0	0	0	0	0	0	0	0	0	0	0	0	0	1	0	0	0	0	1	Bacteria	Firmicutes	Negativicutes	Selenomonadales	Veillonellaceae
