# Supplementary material for: Effects of Hypoxemia by Acute High-Altitude Exposure on Human Intestinal Flora and Metabolism
Source: Microorganisms. 2023 Sep 11;11(9):2284. doi: 10.3390/microorganisms11092284 (PMC10535934; doi:10.3390/microorganisms11092284)
Supplement: Supplementary file 1 [file microorganisms-11-02284-s001.zip › SupplementaryTableS5.xlsx]

## Sheet: Table S4 
Supplementary Table S5:Fecal metabolite measurements in samples from the C and D groups
	C1	C2	C3	C4	C5	C6	C7	C8	C9	C10	C11	C12	C13	C14	C15	C16	C17	C18	C19	C20	D1	D2	D3	D4	D5	D6	D7	D8	D9	D10	D11	D12	D13	D14	D15	D16	D17	D18	D19	D20
Label	C	C	C	C	C	C	C	C	C	C	C	C	C	C	C	C	C	C	C	C	D	D	D	D	D	D	D	D	D	D	D	D	D	D	D	D	D	D	D	D
propane-1,3-diol	0.0157737	0.0143605	0.0108139	0.0182416	0.0201741	0.0152493	0.0134126	0.0216107	0.0100658	0.0237814	0.0160762	0.0149982	0.0223755	0.0168051	0.0197141	0.0238533	0.0286242	0.0319708	0.0155908	0.0163117	0.0190604	0.0183273	0.0154145	0.0107262	0.015102	0.010835	0.0107087	0.0127551	0.020569	0.011558	0.018123	0.00598438	0.0175422	0.015921	0.0203941	0.00963944	0.008348	0.00931876	0.0210726	0.0207971
pyruvic acid	0.00276356	0.00512366	0.00302234	0.00440652	0.00475103	0.0043502	0.00528884	0.00360837	0.00244894	0.00547001	0.00539334	0.00344706	0.00641145	0.00415013	0.00295372	0.00675996	0.0069529	0.00898907	0.00230302	0.00499802	0.0030994	0.00332528	0.00244463	0.00309305	0.00486244	0.00252794	0.00281374	0.00324826	0.00320015	0.00373413	0.00271411	0.00173654	0.00289507	0.00250962	0.00235539	0.00287791	0.00174848	0.00276374	0.00498406	0.00544491
phenol	1.01e-08	0.000144954	0.00062873	0.000108396	0.000593037	0.000112695	7.68e-05	0.000335302	0.0005131	1.15e-08	0.000415737	0.000112422	9e-05	1.3e-08	1.09e-08	0.000256953	0.000379827	0.000313699	7.58e-05	0.000188071	0.000259979	0.000638593	0.000185346	0.000477562	2.04e-08	6.3e-05	0.000235702	0.000766628	0.00030108	0.000298807	0.000230545	6.44e-05	1.02e-08	0.000144518	0.000197644	0.00131309	0.000109216	0.000159512	0.000502924	0.000393665
glycolic acid	8.9e-05	8.55e-05	0.00036292	6.19e-05	0.000127026	7.43e-05	0.000165669	0.000205354	6.13e-05	1.15e-08	0.000104997	5.75e-05	8.21e-05	7.87e-05	7.66e-05	0.000120309	0.000106905	2.15e-08	5.56e-05	5.96e-05	8.04e-05	0.000105624	1.55e-08	0.000312091	8.89e-05	6e-05	7.37e-05	0.000249542	0.000110572	6.43e-05	0.000136739	0.00015564	0.000148975	8.19e-05	0.000138331	1.3e-05	5.01e-05	1.21e-08	0.000102097	0.000191657
lactic acid	0.00433006	0.00250725	0.00321449	0.00308913	0.00533155	0.00357681	0.0047558	0.00864468	0.00207013	0.00377181	0.00589583	0.00327278	0.00425787	0.00331745	0.0037308	0.00587343	0.00527198	0.00623945	0.0030521	0.00329487	0.00344416	0.00385333	1.55e-08	0.00199668	0.00310704	0.00200804	0.00184604	0.00193437	0.00522598	0.00147253	0.00550675	0.00106423	0.00403169	8.99e-09	0.00646341	0.0019419	0.00220627	0.00220957	0.00546206	0.00805069
isobutene glycol	0.000132628	0.000271632	8.52e-05	7.39e-05	0.000171331	8.51e-05	0.000205946	0.000206494	8.16e-05	0.000141616	0.00017603	6.87e-05	0.000126752	8.29e-05	0.000135184	0.000173292	2.18e-08	0.000176266	0.000152938	9.77e-05	0.000150601	1.07e-08	6.54e-05	0.000130421	7.76e-05	7.42e-05	1.17e-08	7.84e-05	3.55e-06	6.25e-05	0.000261725	3.56e-05	0.000156439	8.99e-09	9.69e-09	6.36e-05	5.71e-05	4.83e-05	0.000198655	0.0001245
acetophenone	0.000161671	0.000153869	9.7e-05	0.000124481	0.000226832	9.66e-05	8.73e-05	1.13e-08	0.000105979	0.000226419	0.000105945	0.000106948	0.000158931	0.000139112	1.09e-08	0.000189565	0.000216115	0.00024516	0.000105822	0.00013572	1.03e-08	0.000215188	0.000115332	2.47e-05	0.000154304	7.77e-05	0.000108468	0.000111813	0.000176777	9.5e-05	9.03e-09	4.06e-05	0.000235326	0.000199756	9.69e-09	5.43e-05	8.68e-05	8.74e-05	0.000211185	0.000220099
enolpyruvate	0.0022984	0.00246841	0.00143534	0.00167396	0.00229001	0.00133224	0.00112008	0.00246487	0.001729	0.00290172	0.00159467	0.00151123	0.00209346	0.00205625	0.00226061	0.00204084	0.00302891	0.00308556	0.00130004	0.00204913	0.00283746	0.00269434	0.00147897	0.00123659	0.00228801	0.00111191	0.0010944	0.00137475	0.00234743	0.00155095	0.00213812	0.000786022	0.00265012	0.00224031	0.00315504	0.000725571	0.00133119	0.00129678	0.00275082	0.00280633
maleimide	0.00031784	0.000144666	0.000131157	0.000382098	0.000242165	0.000181704	9.72e-05	0.000178694	0.00019941	0.000216752	0.000220389	0.000189088	0.0002206	0.000265681	0.000409702	0.000198408	0.000396017	0.000384429	0.00018309	0.000202373	0.000365189	0.000318297	0.00019322	0.000217902	0.000231022	0.000133784	0.000153341	0.000160914	0.000235332	0.000202125	0.000158496	9.1e-05	0.000245407	8.99e-09	9.69e-09	0.000147043	0.000217739	0.000122764	0.000233624	0.000227663
octanol	0.000558779	0.000434444	0.000168654	0.000371788	0.000994275	0.000428506	0.000255608	0.00104296	0.000204802	0.000898673	0.000428188	0.000351106	0.000460931	0.000462553	0.000837418	0.000950337	0.000967029	0.00180427	0.000327529	0.000735823	0.000636293	0.000654217	0.000278345	0.000409847	0.000599251	0.000222651	0.000167098	0.00026649	0.000693406	0.000325186	0.000690068	0.000197254	0.000794548	0.000481112	0.000643503	0.000273172	0.000192586	0.000252067	0.000921081	5.65e-06
alanine	0.10037	0.0192749	0.0730264	0.0512799	0.0594163	0.017511	0.0297903	0.0334463	0.0482162	0.059274	0.0422029	0.0390614	0.0973002	0.0367328	0.0673055	0.0535048	0.0506565	0.0284295	0.033159	0.038905	0.0625388	0.0555465	0.103471	0.0459996	0.0437585	0.0486851	0.0901941	0.0534418	0.0571091	0.0305116	0.0761166	0.0404426	0.0398817	0.0664097	0.0962759	0.0648327	0.0624772	0.0525357	0.0556096	0.0444224
3-hydroxypropionic acid	0.000930466	0.00123935	0.000506235	0.000743577	0.00125683	0.00107452	0.000621172	0.00124886	0.000426858	0.00140872	0.00122085	0.000641317	0.000982753	0.000761985	0.00112824	0.00137208	0.00135669	0.00187877	0.000679001	0.000933427	0.00112256	0.00104252	0.000725438	0.000550995	0.000745917	0.000637019	0.000514417	0.000519945	0.00102442	0.000687794	0.00102117	0.000526132	0.000948737	0.000806829	0.00111744	0.000536214	0.000647966	0.000488884	0.00123109	0.00131957
3-hydroxybutyric acid	0.00108429	0.0016783	0.000754102	0.00104846	0.00190015	0.00130516	0.000877134	0.00192885	0.000648295	0.00143896	0.00189995	0.000838177	0.00132171	0.000838151	0.0015034	0.00183633	0.00154586	0.00235772	0.00108168	0.00107607	0.00138704	0.00131386	0.00107215	0.000687042	0.000723003	0.000766252	0.00084795	0.000927714	0.00146065	0.000821608	0.00165246	0.000615299	0.00135443	0.00107394	0.00165921	0.000804123	0.00084194	0.000590962	0.00140881	0.00163376
benzylalcohol	0.00537292	0.000459952	0.000430733	0.000720061	0.000448689	0.00311438	0.000169604	0.000692916	0.000751818	1.15e-08	0.000547795	0.00875924	0.000182664	0.00438032	0.00082802	0.000246446	0.00360267	0.00171323	0.00182369	0.000443235	0.00473177	0.000703995	0.000720076	0.00398089	0.00178306	0.00457638	1.17e-08	0.000711369	0.00119121	0.00125358	9.03e-09	0.00150249	1.02e-08	8.99e-09	9.69e-09	0.00256305	0.0044991	0.00559805	0.000364128	0.000450618
sulfuric acid	0.000726113	0.000931177	0.00045827	0.000564128	0.00139613	0.00112478	0.000613597	0.00106538	0.000373193	0.00104901	0.00116088	0.000576731	0.000834012	0.000546707	0.00079692	0.0012145	0.00133233	0.0016528	0.000764359	0.000784102	0.000651618	0.000971186	0.000694751	0.000379314	0.000535356	0.000531856	0.000769875	0.000423644	0.00127014	0.000496328	0.000933589	0.000414784	0.000936231	0.000725966	0.00107745	0.000406847	0.000586644	0.000454453	0.00102093	0.00134308
N-methylalanine	0.00669783	0.000539166	0.00851699	0.00233417	0.00853069	0.000757162	0.00141717	0.00568865	0.00715839	0.00192405	0.00277518	0.00077497	0.0108397	0.000812647	0.00170399	0.0117244	0.00130698	0.00166737	0.0024292	0.000867711	0.00176755	0.00368412	1.55e-08	0.00124971	0.000584313	0.00686732	1.17e-08	0.00114561	0.00386496	0.000787016	0.00750097	0.0010075	0.000764166	0.00330293	9.69e-09	0.00519936	0.00421224	0.00341668	0.00128877	0.00108554
succinate semialdehyde	0.000139035	6.56e-05	4.21e-05	0.000391928	0.000211006	7.54e-05	4.72e-05	2.66e-05	3.3e-05	0.000148752	5.86e-05	8.1e-05	3.33e-05	5.81e-05	8.87e-05	3.44e-05	8.41e-05	2.15e-08	0.000134245	3.55e-05	0.000173966	0.000195066	1.55e-08	0.000156969	0.000122239	0.000151019	0.000101924	6.44e-05	0.000288379	0.000147698	8.25e-05	2.68e-05	0.000226043	0.000172809	9.69e-09	9.66e-05	0.000184064	7.67e-05	8.14e-05	4.42e-05
methanolphosphate	0.000140156	0.000807116	0.000108603	1.65e-08	0.000192969	0.000124107	3.09e-05	0.00022049	0.000549758	5.37e-05	0.000977475	0.000338328	0.000729206	0.000141517	0.000124377	3.82e-05	0.000675755	0.00107318	0.0001196	5.34e-05	0.000310471	0.000815778	0.0028663	8.93e-05	0.000246277	7.04e-05	8.43e-05	0.000128871	0.00270888	0.000261623	5.07e-05	9.69e-05	0.00160808	8.99e-09	0.000719255	2.45e-05	0.000912969	4.33e-05	0.000125464	6.63e-05
malonic acid	0.000742447	0.000149684	0.000435983	0.000700351	0.000406155	0.000240554	0.000144337	0.000611897	0.000358961	0.000431834	0.000495973	0.000210392	0.000694359	0.000304553	1.09e-08	0.000361064	0.000501775	0.000879333	0.00019643	0.000203963	0.000751784	0.000494052	0.000904384	0.000425423	0.000227811	0.000216421	0.000341444	0.000330876	0.00054536	0.000172439	0.000370909	0.000192898	0.000504669	0.000600401	0.000582441	0.000243631	0.000340003	0.000182544	0.000579165	0.000463784
methylmalonic acid	0.000435063	0.000874496	0.000352432	0.000818295	0.000836883	0.000637143	0.000656105	0.000593569	0.000299665	0.000869849	0.000858184	0.000527718	0.00100734	0.000576883	0.000509833	0.000933059	0.00113331	0.00140047	0.000566311	0.000785396	0.000346216	0.00076155	0.000610168	0.000361594	0.000543454	0.00034303	0.000511468	0.000334839	0.000767516	0.000400424	0.000380481	0.000248189	0.000552476	0.000499745	0.000348605	0.000329949	0.000324117	0.00037076	0.000928679	0.000905454
norvaline	1.01e-08	0.00673585	0.0373361	0.00695095	0.0252671	0.004604	0.00924795	0.0168362	0.0404557	0.0209084	0.00458264	0.0129981	0.0327801	0.00893885	0.0359167	0.0144411	0.00449952	0.00373759	0.0140225	0.0138067	0.0325975	0.0215239	0.0197753	0.0107518	0.0175065	0.0151624	0.0347763	0.0332242	0.0126563	0.00897302	0.0304814	0.0137475	0.0134892	0.0260699	9.69e-09	0.0329783	0.0257835	0.0213608	0.0314902	0.0188313
4-hydroxybutyric acid	1.01e-08	0.00134138	0.00832498	0.00143528	0.00524469	0.000948423	0.00188007	0.00329292	0.00923287	0.00431758	0.00096383	0.00269955	0.00688641	0.00178259	0.0073147	0.00292479	0.000890942	0.00440482	0.00292178	0.00281872	0.00663572	0.00445106	0.00409834	0.00214005	0.00351668	0.00311738	0.0078212	0.00744635	0.0025434	0.0017669	0.00603301	0.00281431	0.00271198	0.00550642	9.69e-09	0.00667232	0.00566352	0.00450971	0.00662608	0.00390152
urea	0.000116082	5.31e-05	0.00190185	0.000123621	0.000925135	0.000161093	8.1e-05	0.00103654	1.33e-08	0.000296376	0.000235105	0.000209702	0.0020838	9.95e-05	0.000113722	1.36e-08	5.77e-05	0.000139076	2.13e-05	4.19e-05	5.75e-05	0.00127939	1.55e-08	5.95e-05	8.24e-05	0.000136229	0.000153329	0.00141767	0.000661084	0.000145987	0.000575543	0.000182058	9.32e-05	0.000464853	0.000712814	6.96e-05	0.000218751	7.13e-05	6.71e-05	0.000163686
benzoic acid	0.00072395	0.00173349	0.000500423	0.000652483	0.000729155	0.00106545	0.00158577	0.000955736	0.000801609	1.15e-08	0.00101695	0.000577098	0.000955785	0.000421932	0.000579793	0.000707912	0.00161629	0.00155367	0.000910597	0.0011804	0.000604232	0.000809748	0.00057697	0.000328557	0.000668934	0.000441394	0.000513022	0.000598654	0.000774098	0.000735555	0.000691897	0.000409205	0.00122834	0.000505226	0.000556979	0.000463333	0.000595376	0.000339636	1.26e-08	0.00102712
caprylic acid	0.000451599	0.000715278	0.000384189	0.000437057	0.000545087	0.000634161	0.000869469	0.000591319	0.000336522	0.000508138	0.000795105	0.000658606	0.000989634	0.00060498	0.000442357	0.000689357	0.000818459	0.000587514	0.000777845	0.000366352	0.000429682	0.000750667	0.000482685	0.000365639	0.000309815	0.000475742	1.17e-08	0.000594747	0.0007213	0.000320945	0.00064682	0.000345714	0.000452184	0.000663539	9.69e-09	0.000425618	0.000374798	0.000274644	0.00074784	0.000404552
leucine	0.000656932	0.000809446	0.000282142	0.000289242	0.00071544	0.000311764	0.000597271	0.000766322	0.000193233	0.00068267	0.00052205	0.000376309	0.000909801	0.000410701	0.000489893	0.000712856	0.000725067	0.000580965	0.00065478	0.000576712	0.000585331	0.000405213	0.000521331	0.000173527	0.000328854	0.000370873	0.00036663	0.000532605	0.000416223	0.000287069	0.000477362	0.000193094	0.000385588	0.000659996	0.000663354	3.53e-05	0.000434912	0.000461599	0.000726254	0.00049063
isoleucine	1.01e-08	0.00747426	0.0162777	0.00650168	0.0174081	0.00450864	0.0104059	0.00735582	0.0321397	0.0224462	0.00381279	0.0124281	0.020601	0.00824108	0.0395788	0.0109173	0.0036812	0.00356285	0.0151126	0.0138254	0.0343716	0.0124144	0.0135509	0.0136072	0.0185409	0.0165752	0.0378922	0.0394965	0.0109459	0.0120035	0.0316445	0.0159911	0.0159178	0.0325953	9.69e-09	0.04216	0.0315613	0.0221294	0.0325611	0.0185798
epsilon-caprolactam	1.01e-08	0.000160627	0.000110031	0.000160243	0.000388712	0.000143664	0.000127475	0.000385046	0.000212577	0.00041105	0.00013766	0.00016326	0.000230276	0.000152832	0.000496213	0.000343677	0.000286195	0.000504727	0.000166473	0.000295631	0.000402633	0.00026804	0.000160642	0.000169223	0.000231799	0.000148185	0.000296636	0.000318566	0.000272961	0.000126223	0.000441604	0.000119852	0.00031713	0.000364242	9.69e-09	0.000262751	0.000224046	0.000188568	0.000441973	0.00037357
phosphate	0.0069686	0.00429083	0.00193582	0.0110635	0.00303758	0.00650202	0.00103862	0.00193429	0.00279776	0.00324404	0.00300741	0.00604372	0.00410142	0.0049126	0.0059569	0.00224407	0.00939129	0.0100523	0.00256838	0.00207338	0.00699513	0.0114069	0.00695596	0.00452149	0.00259238	0.00469565	0.00260178	0.00281046	0.00443577	0.00124095	0.00403274	0.0028629	0.0069247	8.99e-09	0.00740422	0.0033837	0.0090522	0.00363703	0.0046178	0.00227391
1-deoxyerythritol	0.0382751	0.0534069	0.0193804	0.0214352	0.0280216	0.0351182	0.0219856	0.026865	0.0254849	0.0327787	0.0275138	0.0223803	0.0245001	0.0267396	0.0321943	0.0276542	0.00301849	0.040602	0.0472596	0.0249013	0.0362901	0.000366242	0.000299059	0.0164871	0.0280833	0.0267574	0.038657	0.04808	0.0325968	0.0309583	0.0389352	0.0231347	0.036013	0.0303719	0.0395134	0.0239777	0.0269345	0.0364119	0.0341518	0.0331861
nicotinic acid	0.00258258	0.00280952	0.000543131	0.00186801	0.000848693	0.00315379	0.00170322	0.000999125	0.00277428	0.00416352	0.000801251	0.00171084	0.00191039	0.00426668	0.00292659	0.00148482	0.00229028	0.00441711	0.000744554	0.00369286	0.0016226	1.07e-08	0.000561332	0.00289475	0.00203494	0.00295979	0.00169925	0.00359997	0.00299148	0.00153988	0.00235686	0.000715705	0.00368661	0.00489896	0.00461673	0.000516675	0.00299007	0.00283714	0.00237437	0.00270768
norleucine	1.01e-08	0.00499339	0.0122295	0.00378992	0.00860107	0.00294897	0.00689114	0.0041879	0.0200238	0.0154996	0.00196036	0.00882628	0.0102185	0.00616811	0.0296625	0.00710473	0.00235021	0.0017193	0.00941741	0.0106202	1.03e-08	0.00940645	0.00476379	0.00834248	0.0117711	0.0115341	0.0265075	0.0256246	0.00582121	0.00618755	0.0224894	0.00991516	0.0108817	0.0218519	9.69e-09	0.0288603	0.0208433	0.0164297	0.0217238	0.0129864
phenylacetic acid	0.00591472	0.000434732	6.15e-05	0.000492513	0.000270171	0.00276102	0.00075343	0.000264543	0.000793088	0.00654206	0.00237123	0.00467755	0.000413581	0.00538885	0.0029672	0.000361804	0.00100484	0.000173432	0.00268935	0.000831043	0.00290831	0.00266678	0.000716038	0.0018463	0.00140016	0.00196813	0.00588281	0.00315886	0.000589103	0.000547013	9.03e-09	0.00115202	0.00428663	8.99e-09	9.69e-09	0.00208531	0.00253121	0.00258766	0.00056176	0.000680964
proline	1.01e-08	0.00556524	0.0028171	0.00281077	0.00451166	0.00477388	0.00355366	0.00343215	0.00414794	1.15e-08	0.00766363	0.00639494	0.00267206	0.0106765	1.09e-08	0.00328402	0.00412434	0.00253433	0.00904907	0.00665143	0.0169415	0.00907097	0.00222912	0.00803389	0.00775932	0.0204924	1.17e-08	0.00987144	0.00421908	0.00321899	9.03e-09	0.00549601	0.00832866	8.99e-09	9.69e-09	0.0163222	0.0157516	1.21e-08	0.0160218	0.0045697
glyceric acid	0.000175129	0.000108647	9.5e-05	0.000197553	0.00031956	9.89e-05	0.000114203	0.000299599	9.59e-05	0.000232294	4.66e-05	0.000128669	0.00022246	9.2e-05	1.09e-08	0.000193484	0.000175848	0.000345231	0.000131613	0.000142802	0.000314377	0.000174589	0.000160766	0.000107772	9.16e-05	9.76e-05	0.000116168	0.000112433	0.000219352	8.74e-05	0.000216174	7.63e-05	0.000169016	0.000142472	0.000256701	0.000122613	0.000107562	7.7e-05	0.000238575	0.000200848
succinic acid	0.00564347	0.00367959	0.0440159	1.65e-08	1.28e-08	0.00279399	0.010593	0.0013388	0.00950471	0.00787919	0.0115807	0.00344905	0.0019266	0.00385282	0.00887184	0.00903029	0.00418572	2.15e-08	0.00226289	0.0141195	0.00800685	0.00842248	1.55e-08	1.33e-08	0.00689331	0.00380524	0.00596407	0.00203652	1.25e-08	0.0703829	0.00255468	0.00380392	0.00616884	0.00712799	0.0152667	0.00379544	0.005193	0.00432836	0.00407498	0.00355762
1-methylhydantoin	0.00057005	0.000176961	0.000334653	2.7e-05	0.000535029	0.000369034	0.000150618	0.000710677	0.000440165	0.000939875	0.00081177	0.0001576	0.000387663	0.000146158	1.09e-08	0.000235701	0.000125302	0.00148519	0.000164542	0.000151266	1.03e-08	0.000306586	2.05e-05	0.000451247	0.000453925	0.000232104	0.000103889	0.000544646	0.000693012	0.000186499	0.000163715	0.000182431	0.000331483	0.000444745	0.000448568	0.0011981	0.000335599	0.000136182	1.95e-06	0.000209219
resorcinol	0.000422802	0.000274206	0.000100952	0.000231098	0.00063738	0.000232219	0.000172535	0.000632826	0.000142843	0.000523451	0.000249909	0.000192565	0.000292649	0.000227666	0.000545376	0.000542506	0.000459847	0.000984837	0.000188777	0.000458551	0.000410435	0.000399016	0.000171592	0.000202639	0.000282228	0.000136395	0.000144603	0.000190676	0.000410734	0.000195997	0.000491367	0.000124126	0.000441068	0.000338082	0.000516968	0.000183698	0.000134497	0.000120507	0.000578325	0.000520116
uracil	1.01e-08	0.0176897	0.00188522	0.00303931	0.00154161	0.00865601	0.00710085	0.00172496	0.007501	0.0103325	0.0024803	0.00961154	0.00211747	0.00914475	0.00372024	0.00237876	0.00323071	0.00344793	0.00874499	0.00435956	0.0121422	0.0121149	0.00175987	0.00551609	0.00656876	0.0123322	0.0146239	0.00854296	0.00602488	0.0054588	9.03e-09	0.00472308	0.0114045	0.0156652	9.69e-09	0.00148006	0.0179623	0.0179224	0.00578537	0.00544675
pipecolic acid	0.000131511	0.000310498	0.000125919	0.000287761	0.000272166	0.00020634	0.000243901	0.000168371	0.000118926	1.15e-08	0.000266381	0.000167016	0.000354486	0.000164375	0.0001873	0.000302206	0.000316095	0.000506499	0.000190715	0.000236898	0.000130041	0.00022971	0.000180464	0.000114985	0.000168824	0.000126259	0.000171138	0.000130822	0.000224422	0.000153743	0.000110909	9.08e-05	0.000187422	0.000160255	0.000112893	0.000136889	0.000114442	0.000110614	0.000336617	0.000247014
pelargonic acid	3.82e-07	0.0005334	0.000219136	0.000370994	0.000348723	0.000560295	0.000534303	0.000366996	0.000260351	0.000419601	0.000461378	0.000431514	0.000537644	0.000476468	0.000266338	0.0003826	0.000726804	0.000481613	1.39e-08	0.000309807	0.000305934	0.000906188	0.000368671	0.000340293	0.00024594	0.000354405	1.17e-08	0.000493391	0.00077366	0.000235441	9.03e-09	0.00106117	0.000529634	8.99e-09	9.69e-09	0.000260282	0.000257861	0.000408272	0.000420254	0.000323019
erythronic acid lactone	0.000955938	0.000957606	0.000559665	0.000773299	0.001422	0.000885515	0.000431108	0.0015204	0.000556421	0.00105373	0.000905949	0.0005012	0.000867126	0.000551146	0.00122032	0.00118656	0.000906487	0.00164289	0.000736582	0.000914165	0.000974112	0.000934081	0.00072674	0.000484078	0.00053235	0.000458514	0.000569182	0.00058389	0.00111097	0.000449045	0.00104448	0.000435306	0.000886576	0.000771204	0.0012859	0.000490068	0.000476542	0.000558788	0.00098502	0.00117628
threonine	1.01e-08	0.00331448	0.00107404	0.00263671	0.0017182	0.00189275	0.0020789	0.000973746	0.00348207	0.00504353	0.000801198	0.00307948	0.00119381	0.00274456	1.09e-08	0.00227284	0.0022847	0.00161379	0.00230668	0.00497056	1.03e-08	0.00205881	0.001401	0.00383649	0.00603456	0.00268605	0.00551533	0.00515421	0.00299372	0.00241457	0.00391371	0.00426547	0.00552573	8.99e-09	0.00556379	0.00835269	0.00712084	0.00350853	1.26e-08	0.00464169
pipecolinic acid	0.00590873	0.00159856	0.00105053	0.00224201	0.000869621	0.00583064	0.00084817	0.000947907	0.00264578	0.00426061	0.000650157	0.000261956	0.000915779	0.00336186	0.00378856	0.000769262	0.00211793	0.00102305	1.39e-08	0.00168959	1.03e-08	0.0030235	0.000951057	0.00618024	0.00213144	0.00561129	1.17e-08	0.00716233	0.0013381	0.00123052	9.03e-09	0.00278321	0.00457078	0.00124216	9.69e-09	0.00194215	0.0021529	0.00254322	0.00154629	0.00266652
4-methylcatechol	0.000184402	0.000194633	9.29e-05	0.000200399	0.000189369	0.000183189	0.000135996	0.000234447	0.000113727	0.000307879	0.00021405	0.000115424	0.000220096	0.000158298	0.000223855	0.000195494	0.000275238	0.00027798	0.000158452	0.000148098	0.000267125	0.000245785	0.000170352	0.000134977	0.000174079	0.00010589	0.000147559	0.000159405	0.000193999	0.000168301	0.00017996	0.000100191	0.000212815	0.000241819	0.000256734	0.000118701	0.00011082	0.000121126	0.000225502	0.00018608
allothreonine	1.01e-08	0.00146673	0.00799979	0.00330231	0.002391	0.00157881	0.00195392	0.00139862	0.00412887	0.00455439	0.00176482	0.00200003	0.0032553	0.00192293	1.09e-08	0.0016164	0.00265347	0.00201032	0.001452	0.00362135	1.03e-08	0.00298257	0.00310883	0.00255319	0.00290227	0.00171783	0.00308091	0.00517821	0.00420947	0.00284977	0.00455366	0.0034301	0.00299212	0.00527627	0.00372754	0.00557629	0.00422452	0.00261259	1.26e-08	0.00360678
glutaric acid	0.000985866	0.00304118	0.000751943	0.00105225	0.000619566	0.00450034	0.000915797	0.00123784	0.00187299	0.0027113	0.00148175	0.00152232	0.000747287	0.00311791	0.000838125	0.000555131	0.00177382	0.0014806	0.00245802	0.00249296	0.00163757	0.00265387	0.000799932	0.00196831	0.00121912	0.00127953	0.00269879	0.00169204	0.00183307	0.00083319	0.00262173	0.00110847	0.00345219	0.000697001	0.00551485	0.000479204	0.00164697	0.0023422	0.00296814	0.00317764
thymine	1.01e-08	0.001069	0.0001795	0.000224602	0.000195207	0.000921742	0.000290139	0.000131988	0.000501578	0.00165428	0.000341331	0.00191074	0.000167126	0.00105815	0.00041389	0.000147646	0.000214477	0.000190803	0.000894715	0.000271637	1.03e-08	0.000579539	0.00029675	0.000300667	0.000713791	1.28e-08	1.17e-08	0.00149634	0.00028467	0.000324512	9.03e-09	0.000878476	0.00142997	8.99e-09	9.69e-09	0.000197997	1.27e-08	1.21e-08	0.000424681	0.000722559
2-methylglutaric acid	9.58e-05	0.000353649	8.62e-05	0.000229981	0.000150045	0.000280416	0.000177467	8.31e-05	0.000333194	0.000598954	0.000182475	0.000408825	8.75e-05	0.000194578	0.000201789	0.000201641	0.0004158	0.000227832	0.000273538	0.000148744	1.03e-08	0.000315169	0.000140757	0.000302208	0.0002755	0.000650723	1.17e-08	0.000457527	0.000227819	0.000221163	9.03e-09	0.000241775	0.000498961	8.99e-09	0.000156432	9.24e-05	1.27e-08	1.21e-08	0.000236428	0.000475341
hydrocinnamic acid	0.00065744	0.0125476	0.00037063	0.000441203	0.000975067	0.00149421	0.00540684	0.00118258	0.0020309	0.0127778	0.000983902	0.011236	0.000627258	0.000280779	0.000475486	0.000545317	0.0190848	0.00378307	0.00322406	1.1e-08	0.000105266	0.0132988	0.00119989	0.00239164	0.000340438	0.00205038	0.0100208	0.00164349	0.00712939	0.000420302	0.00668749	0.0026731	0.00600672	0.00912293	0.00483271	0.00018909	0.00373286	0.0038478	0.0015132	0.0145234
aminomalonate	1.12e-05	8.56e-06	1.3e-08	3.11e-05	4.84e-06	1.83e-05	1.12e-05	1.13e-08	1.2e-06	1.96e-06	3.51e-08	8.08e-06	2.1e-08	3.06e-06	1.09e-08	9.55e-06	4.15e-06	4.19e-05	4.9e-06	1.36e-05	7.48e-06	5.36e-06	5.33e-05	5.37e-06	3.51e-05	2.98e-06	2.33e-06	6.88e-06	1.25e-08	1.65e-05	2.47e-06	3.03e-06	4.46e-06	9.5e-06	1.33e-05	3.64e-05	2.34e-06	2.45e-06	4.28e-05	2.59e-06
threose	0.000432584	0.00150606	0.000371595	0.000562623	0.000370278	0.000523183	0.000199878	0.000444212	0.000844583	1.15e-08	0.0003466	0.000267192	0.000133928	0.000685292	8.98e-05	0.000223381	0.000408044	0.000786959	0.000290683	0.000258436	0.000510405	0.000495256	0.000333931	0.000888678	0.000562483	0.000423649	0.00068155	0.000539904	0.000320925	0.000885316	0.000357084	0.000597677	0.000896174	0.000530923	0.00053047	0.000149907	0.000430304	0.000957846	1.26e-08	0.000555631
capric acid	1.01e-08	0.000216762	0.000115197	0.000142346	0.000139092	0.000209343	0.000176537	0.000218177	5.69e-05	0.000157527	2.05e-05	0.000213768	0.00018133	0.00013325	1.93e-05	3.63e-05	0.000218639	5.34e-05	0.000193416	0.000119422	1.03e-08	0.000189122	2.31e-05	0.00013169	9.66e-05	0.000107996	0.000164136	0.000177795	0.000149507	0.000123984	0.000147109	0.000101869	0.000110211	7.86e-06	0.000128765	0.000139392	0.000117764	8.61e-05	0.000185089	0.000127879
5,6-dihydrouracil major	1.01e-08	0.00122891	0.000577445	0.00130924	0.000793601	0.000421067	0.00012661	0.000844218	0.000967543	0.00240348	0.000483223	0.000152156	0.00084373	0.000954847	0.00143374	0.00041171	0.000789422	0.00149069	0.0001735	0.00149602	1.03e-08	0.000987766	0.000589214	0.00174719	0.000581889	0.000541406	0.000608618	0.000393864	0.00128947	0.000470136	0.000959437	0.000579504	0.00193777	0.00128814	0.000435566	0.00029405	0.00145265	0.00044863	0.00107545	0.0006958
n-acetylglutamate	1.24e-05	2.88e-05	1.31e-05	1.63e-05	6.44e-05	2.45e-05	6.92e-06	1.55e-05	2.19e-05	7.5e-05	1.39e-05	5.42e-06	3.58e-06	9.64e-06	1.09e-08	2.19e-05	2.01e-05	8.78e-05	0.000192652	0.000355646	9.92e-05	1.07e-08	2.04e-05	2.63e-05	2.61e-05	0.000216535	9.72e-05	4.14e-05	0.000176496	4.87e-05	0.00025256	2.55e-06	0.00033436	0.00033297	9.69e-09	2.4e-05	0.000188252	9.99e-05	0.000217683	0.000107013
adipic acid	0.000964503	0.000857615	4.65e-05	0.000103042	6.79e-05	0.000506123	6.88e-05	4.78e-05	0.000300211	0.000349707	9.17e-05	0.000190963	4.52e-05	0.000489902	0.000124274	0.000154974	0.000226559	0.000132248	0.00113146	0.000114642	1.03e-08	0.000438077	0.000125569	0.000252507	0.000223486	0.000268941	0.00038163	0.000273936	0.000212408	0.000188086	0.000792503	0.00022806	0.000457484	0.000729406	0.000519546	8.63e-05	0.000391842	0.000232728	5.36e-05	7.24e-05
1,5-anhydroglucitol	5.37e-05	8.6e-05	0.000685206	1.65e-08	0.000967202	2.53e-05	0.000465152	5.29e-06	0.000638443	0.000130763	0.00164214	3.35e-06	0.000275861	2.77e-05	9.27e-05	1.36e-08	3.73e-05	2.15e-08	5.42e-05	1.1e-08	7.33e-05	2.8e-05	1.55e-08	0.00045755	3.39e-05	1.89e-05	3.64e-05	7.31e-05	8.86e-05	0.000109882	0.000167991	3.17e-05	4.09e-05	2.58e-05	6.69e-05	1.33e-05	1.87e-05	3.45e-05	1.26e-08	1.24e-08
methionine	1.01e-08	0.000506396	0.00117304	0.00143356	0.00087528	0.000343039	0.00078232	0.00082589	0.000999867	0.00350334	0.000736733	0.000708252	0.00122894	0.00118698	1.09e-08	0.00192397	0.00043636	0.00117284	0.000699327	0.00212174	0.00312595	0.000977506	0.000304545	0.0027224	0.0016018	0.00128097	0.00459657	0.00284046	0.000811165	0.00184401	0.00280852	0.00129312	0.000865033	0.00241632	9.69e-09	0.00464932	0.00125057	0.000805135	0.00277267	0.00168767
oxoproline	0.0659913	0.0195118	0.0120849	0.0124641	0.0167732	0.0125779	0.00247346	0.0148106	0.0265049	0.0454428	0.0171731	0.0536063	0.00523225	0.0477849	0.0443157	0.00854806	0.0214599	0.0128349	0.01139	0.0499316	0.0294992	0.0494456	0.00651048	0.0336189	0.0412991	0.034967	0.0310144	0.0209108	0.0251226	0.00564558	0.0345318	0.0156466	0.06597	0.0683816	0.0658359	0.0352676	0.0546337	0.0412663	0.0525948	0.0304862
cytosin	1.01e-08	0.000137232	5.34e-05	3.92e-05	2.47e-05	9.52e-05	2.69e-05	3.79e-05	7.03e-05	0.000135235	2.69e-05	0.000226646	2.53e-05	0.000211795	0.00028154	3.8e-05	2.14e-05	9.81e-05	7.44e-05	0.000217931	0.000135291	0.000248407	2.12e-05	7.22e-05	9.85e-05	0.000157734	0.000211771	0.00010452	4.76e-05	2.88e-05	9.03e-09	5.42e-05	0.000363175	8.99e-09	9.69e-09	2.93e-05	0.000265862	0.00016613	0.000261008	8.43e-05
4-hydroxyproline	1.01e-08	0.000148074	0.000101539	0.000154923	0.000545151	0.000232672	4.27e-05	2.01e-05	8.95e-05	0.000223622	8.01e-05	0.000106209	0.000122655	9.76e-05	0.000117078	4.58e-05	0.000103245	6.04e-05	0.000173681	9.97e-05	7.81e-05	0.000482825	6.4e-05	0.000275415	2.04e-08	0.000169945	0.000133555	0.000157363	0.000131067	7.4e-05	0.000480978	7.1e-05	0.000165808	8.99e-09	9.69e-09	5.42e-05	0.000125968	8.29e-05	0.000159543	1.24e-08
isothreonic acid 4	0.000282148	0.000101486	4.58e-05	0.000110836	0.000346517	0.000116573	6.86e-05	0.000468667	6.79e-05	0.00026468	0.000115393	0.000110087	0.000139475	0.000110047	0.000343652	0.000303157	0.0002365	0.000476942	8.6e-05	0.00025842	0.00023787	0.000241351	9.66e-05	0.00013161	0.000156748	8.09e-05	7.04e-05	9.39e-05	0.000230105	8.94e-05	0.000330605	6.56e-05	0.000269578	0.000220502	0.000398613	0.000112378	7.85e-05	7.77e-05	0.000327555	0.000305792
pyrogallol	8.81e-06	1.58e-05	1.73e-05	1.78e-05	8.48e-06	1.55e-05	6.83e-06	1.13e-08	1.33e-08	6.08e-06	3.51e-08	1.04e-05	8.52e-06	9.4e-06	1.5e-05	3.85e-06	1.96e-05	3.64e-05	1.85e-05	1.1e-08	1.41e-05	6.57e-06	2.05e-05	3.43e-06	1.24e-05	9.44e-06	1.02e-05	9.93e-06	5.45e-06	1.91e-05	6.42e-06	1.02e-05	8.03e-06	1.47e-05	7.92e-06	1.73e-05	7.75e-06	1.03e-05	1.47e-05	7.22e-06
cysteine	0.000205942	1.63e-05	0.000214505	0.000201194	6.47e-05	4.58e-05	2.13e-05	0.000169028	0.000118121	8.12e-05	0.000101748	4.8e-05	0.000447137	8.33e-05	1.09e-08	5.64e-05	5.98e-05	9.04e-05	5.28e-05	2.69e-05	0.000239565	0.000100932	0.000168352	0.000174238	4.9e-05	5.96e-05	8.35e-05	8.38e-05	9.64e-05	5.89e-05	7.1e-05	4.57e-05	0.000121311	8.99e-09	0.00016864	7.48e-05	6.17e-05	3.63e-05	0.000152659	5.49e-05
creatinine	0.000124325	2.45e-05	1.3e-08	0.000706458	1.28e-08	1.75e-05	8.34e-05	0.00100674	3.7e-05	4.94e-05	0.00350946	1.39e-05	0.00214763	5.17e-05	9.93e-05	1.36e-08	2.35e-05	1.24e-05	1.65e-05	2.13e-05	8.14e-05	2.04e-05	1.55e-08	0.000145113	1.77e-05	9.96e-06	2.32e-05	3.25e-05	0.000796709	0.000135991	4.19e-06	2.21e-05	1.54e-05	2.34e-05	2.97e-05	1.29e-05	1.39e-05	1.69e-05	2.34e-05	8.76e-06
3 hydroxy-3-methylglutaric acid	1.01e-08	0.000764152	0.000277641	0.000296772	0.000133414	0.00033619	1.36e-05	1.13e-08	6.29e-05	0.000542797	7.91e-05	3.21e-05	0.00012027	3.15e-05	1.09e-08	4.46e-05	4.82e-05	2.15e-08	5.14e-05	1.1e-08	0.000135586	7.08e-05	0.00011589	0.000132002	0.000344641	7.33e-05	4.7e-05	0.000453767	7.94e-05	1.94e-05	3.61e-05	7.31e-05	0.000515657	0.000124729	0.000218677	9.91e-05	9.29e-05	6.21e-05	1.26e-08	0.000353399
3-hydroxyphenylacetic acid	0.000405618	3.94e-05	9.13e-05	3.66e-05	2.65e-05	0.000231661	1.3e-05	0.000182089	0.000327516	0.00055998	1.34e-05	7.31e-05	1.24e-05	0.000173981	9.84e-05	3.37e-06	0.000142901	0.000247951	6.87e-05	0.0001921	6.48e-05	1.07e-08	3.35e-05	0.000289097	0.000151697	0.000233604	0.00034247	5.23e-05	0.000215955	5.4e-05	6.47e-05	1.42e-05	0.000554696	0.000215089	0.000218653	1.14e-05	0.000134446	0.000167804	0.000274687	1.24e-08
2-hydroxyadipic acid	1.01e-08	8.63e-05	7.25e-06	3.04e-05	1.1e-05	0.000170745	3.71e-05	3.46e-05	6.82e-05	0.000261889	2.1e-05	5.74e-05	6.51e-06	0.000124294	6.79e-05	4.79e-05	8.36e-05	4.63e-05	0.00013821	6.35e-05	1.03e-08	0.000223959	5.46e-05	0.000291488	0.000105521	0.000166881	0.000194559	7.37e-05	6.92e-05	5.47e-05	9.03e-09	4.07e-05	1.02e-08	8.99e-09	9.69e-09	0.000108477	9.7e-05	7.06e-06	0.000101074	7.91e-05
acetaminophen	2.18e-05	0.000177321	1.34e-05	0.000389239	0.000694607	0.000124982	0.000273656	3.37e-05	7.54e-06	0.000686065	0.000413981	0.000192565	0.00069625	0.000195839	0.00132154	0.000488171	0.000116846	0.000117292	0.000325765	0.000382518	0.00111878	0.000435105	0.000555776	0.000434256	0.000521153	0.000413481	0.00114837	1.23e-08	0.000321912	0.000440906	0.00102392	0.000404431	0.000490962	0.0010965	9.69e-09	0.00134826	0.000976736	0.000368067	0.00104679	0.000480092
5-aminovaleric acid	0.0228075	0.000444524	0.0655152	0.0538467	0.067231	0.00159739	0.00672443	0.0599386	0.0300826	0.00222687	0.0879846	0.00232523	0.0930886	0.00164961	0.0361131	0.0634242	0.00415496	0.00320572	0.00233998	0.0221994	0.011976	0.0204272	0.0706078	0.00765105	0.00768255	0.00139776	0.00244946	0.00456293	0.0199432	0.0226175	0.00184255	0.00457006	0.00165999	0.00514424	0.00225709	0.0135523	0.00244935	0.00210873	0.0122999	0.00521078
phenylalanine	1.01e-08	0.00120225	0.00390806	0.00245652	0.00432726	0.000780238	0.00187228	0.00338807	1.33e-08	0.0041352	0.00316332	0.00185136	0.00434336	0.00166326	0.00777302	0.00308775	0.00108535	0.000814036	0.00219919	0.00247423	0.0065358	0.00274332	0.0035034	0.0034018	0.00475699	0.00292869	0.0074244	1.23e-08	0.00227493	0.00351792	0.00551592	0.00291317	0.00305383	0.00672626	9.69e-09	0.0101158	0.00643119	0.00332555	0.00646666	0.00321131
4-hydroxyphenylacetic acid	0.000593903	1.27e-05	2.8e-06	0.000469849	4.85e-06	8.54e-06	0.00040547	1.15e-05	0.000477088	2.39e-06	0.00211714	4.4e-06	0.000319134	6.61e-06	1.09e-08	4.12e-06	0.000372988	4.58e-06	3.44e-06	0.000365486	0.000107049	0.000284637	1.55e-08	0.00026041	2.03e-06	2.04e-06	0.000722106	1.23e-08	0.000486955	1e-05	3.34e-06	3.95e-06	0.000219063	0.000109712	0.000296498	2.33e-08	4.21e-06	0.000255773	0.000188133	0.000193253
3-phenyllactic acid	1.42e-05	0.00364318	0.000492133	0.000246074	4.18e-06	1.34e-05	0.00129174	1.13e-08	1.33e-08	2.96e-06	2.52e-05	4.89e-06	9.42e-06	5.3e-06	0.00212801	0.000693514	0.0015479	0.000527649	3.78e-06	6.63e-06	0.00117934	0.00168573	0.000885661	0.00130973	0.00283397	5.85e-06	0.00108112	1.23e-08	0.00240751	0.00219477	0.000168632	4.77e-06	0.000999247	0.000783452	0.000403784	0.0036446	0.000213106	0.00163262	0.000434413	0.000325342
xylose 2	6.92e-05	0.000200657	4.13e-05	0.000239041	0.000142129	0.000116078	0.000139833	0.000408719	0.000218315	7.69e-05	7.39e-05	5.51e-05	0.000154172	0.000403454	0.000175171	0.000120866	8.15e-05	0.000134062	4.99e-05	0.000271763	9.48e-05	0.000114444	0.000330746	0.000358505	0.000119059	7.37e-05	0.000163914	0.000404322	0.000264981	0.000166704	9.03e-09	4.32e-05	0.000104559	3.19e-05	0.000134905	0.000387506	0.000283931	0.000201058	0.000282721	0.000326298
lauric acid	0.000284441	0.00051984	0.000571771	0.000358665	0.000214574	0.000914819	0.000607628	0.000482148	0.000474685	0.000261613	0.00037331	0.000262961	0.000347185	0.000764831	0.000405405	0.000363271	0.000560362	0.00030919	0.000659349	0.000300674	0.000516513	0.00054698	0.00148463	0.00123402	0.000351553	0.000398136	0.00110977	1.23e-08	0.000409573	0.000540978	0.00079155	0.00034082	0.000341224	0.000575392	0.000933333	0.000505473	0.000239251	0.000441332	0.00025905	0.000225011
guanidinosuccinate	1.87e-05	2.32e-05	6.64e-05	4.15e-05	6.07e-05	1.66e-05	7.7e-06	5.5e-05	0.000143682	1.65e-05	0.0001427	2.14e-05	8.43e-06	1.71e-05	1.09e-08	8.94e-06	1.98e-05	1.4e-05	2.23e-05	3.24e-05	4.43e-05	0.000125365	2.88e-05	1.83e-05	2.13e-05	9.82e-06	9.53e-06	6.83e-06	3.61e-05	7.09e-06	4.92e-06	1.59e-05	1.02e-08	7.78e-05	9.05e-06	2.35e-05	3.34e-05	1.26e-05	3.66e-05	8.02e-05
alpha-aminoadipic acid	0.000245737	0.000624087	0.000116638	0.00111548	1.76e-05	4.2e-05	0.000169374	1.13e-08	0.000431405	0.000133059	6.67e-06	5.21e-06	2.1e-08	0.000212198	1.09e-08	0.000397121	5.33e-05	0.000733107	1.27e-05	1.1e-08	1.03e-08	2.47e-05	7.62e-05	0.000314615	2.43e-05	1.21e-05	7.99e-06	1.23e-08	0.000271306	8.13e-05	3.55e-05	3.82e-05	0.000167356	2.66e-05	0.000195381	2.66e-05	3.44e-05	4.24e-06	1.26e-08	1.24e-08
isoribose	0.00831676	0.0359112	0.0202879	0.0196211	0.00199666	0.00597291	0.0272505	0.0217563	0.0107399	0.0161462	0.00902911	0.00442843	0.00819959	0.00557364	0.0159565	0.00975425	0.00601641	0.0292589	0.00778503	0.0288317	0.00708282	0.00257959	0.00899297	0.00988313	0.00842314	0.00370484	0.00214996	0.00840832	1.25e-08	0.0354122	0.0087868	0.00989836	0.0228308	0.00519644	0.00780283	0.000420273	0.00621719	0.00366722	0.00440479	0.0157223
3,6-anhydro-d-hexose	0.000343478	0.000283538	1.3e-08	0.000313842	9.11e-06	7.8e-05	4.67e-06	1.13e-08	4.43e-05	0.000191283	0.000145949	6.51e-05	0.00231223	0.00032216	1.09e-08	0.000138749	0.00104875	2.15e-08	4.31e-05	0.00216478	1.03e-08	0.000376594	0.00013992	0.00089241	6.08e-05	3.27e-05	0.000395657	0.000629317	1.25e-08	0.000201939	0.00247651	6.66e-05	1.02e-08	0.000134235	0.000318398	6.35e-05	3.53e-05	0.00119227	0.000152495	0.00134273
pentonic acid	0.000449135	2.86e-05	9e-06	6.5e-06	0.000561136	3.65e-06	0.000155262	0.000647248	1.46e-05	0.000494327	7.45e-06	3.23e-06	0.000193737	0.000222655	0.00050986	0.000485068	0.000371907	0.000788097	0.000587894	0.000503563	0.000413045	0.000355752	3.67e-06	0.000227732	0.000257504	0.000447146	0.000133684	0.000172495	0.000391763	1.56e-05	0.000499106	2.39e-06	0.000430559	0.00031989	0.000588654	5.57e-06	0.000160509	0.000116631	0.000554926	0.000544267
N-acetylputrescine	1.01e-08	7.2e-05	4.29e-05	0.000187425	9.22e-05	0.000121125	3.82e-05	9.22e-05	0.000133198	0.000143958	5.42e-05	0.000120071	5.22e-05	0.000247385	0.00013327	7.39e-05	0.000191459	0.000190931	9.83e-05	5.31e-05	1.03e-08	0.000324456	4.05e-05	1.33e-08	0.000215418	0.000186599	0.000362877	0.00032538	0.000183208	0.000222003	0.000211668	0.000156147	0.000278509	8.99e-09	9.69e-09	5.46e-05	1.27e-08	3.31e-05	6.22e-05	9.49e-05
isorhamnose	1.01e-08	7.2e-05	4.29e-05	0.000187425	9.22e-05	0.000121125	3.82e-05	9.22e-05	0.000133198	0.000143958	5.42e-05	0.000120071	5.22e-05	0.000247385	0.00013327	7.39e-05	0.000191459	0.000190931	9.83e-05	5.31e-05	1.03e-08	0.000324456	4.05e-05	1.33e-08	0.000215418	0.000186599	0.000362877	0.00032538	0.000183208	0.000222003	0.000211668	0.000156147	0.000278509	8.99e-09	9.69e-09	5.46e-05	1.27e-08	3.31e-05	6.22e-05	9.49e-05
beta-glycerolphosphate	1.01e-08	0.000110588	1.31e-05	1.14e-05	8.84e-06	3.74e-05	1.47e-05	1.12e-05	2.69e-05	3.52e-05	1.04e-05	8.45e-05	1.18e-05	0.000111425	1.69e-05	7.84e-06	1.76e-05	1.87e-05	1.39e-08	3.75e-05	1.03e-08	1.07e-08	4.97e-06	3.44e-05	0.000144365	8.19e-05	5.51e-05	0.00011569	1.72e-05	3.86e-05	3.31e-05	1.73e-05	5.02e-05	8.99e-09	9.69e-09	1.23e-05	1.27e-08	2.99e-05	1.89e-05	2.33e-05
aconitic acid	0.00070142	0.000455092	0.000855967	0.00132084	0.00160658	0.000318814	0.000265637	1.13e-08	0.00102086	0.000180597	0.00168311	0.00036593	0.000878241	0.000463937	1.09e-08	0.000692719	0.000858027	0.0014314	0.000290996	0.00132018	0.000771212	0.000664842	0.00166656	0.000407064	0.000421512	0.000255792	0.000356819	0.000339365	0.0012553	0.000345333	0.000585336	0.000252298	0.000814997	0.000631552	0.000550325	0.00200155	0.000310299	0.00125686	0.000789118	0.00111837
ribitol	0.000373698	9.69e-05	3.97e-05	1.65e-08	9.63e-05	1.83e-05	7.45e-05	0.000223098	0.000170727	1.15e-08	7.4e-05	0.000212884	8.22e-05	0.000279771	0.000274393	0.000684351	8.02e-05	2.15e-08	0.000342973	0.000264664	0.000464569	4.51e-05	4.47e-05	0.000129119	0.000143987	0.000306799	1.17e-08	1.23e-08	7.05e-05	0.000135141	0.000113947	1.14e-05	0.000148134	7.88e-05	0.000434572	6.65e-05	8.6e-05	0.0002992	0.000255943	0.000373483
3-(3-hydroxyphenyl)propionic acid	1.01e-08	2.88e-08	0.000126493	1.65e-08	0.00115974	5.12e-05	0.00105188	0.00304994	0.00244695	7.14e-05	0.00111628	8.67e-05	0.00404862	1.3e-08	1.09e-08	0.00171348	0.00380325	0.00162485	5.17e-05	4.55e-05	0.00267104	0.000811586	0.000103297	0.00477667	0.00659793	2.7e-05	2.2e-05	1.23e-08	0.000626608	0.00468411	8.06e-05	0.000340883	7.17e-05	2.3e-05	5.02e-05	0.00173368	2e-05	0.000125087	1.26e-08	0.000292906
diglycerol	1.01e-08	2.88e-08	3.49e-05	1.65e-08	0.000293273	2.11e-05	1.67e-05	1.13e-08	1.33e-08	0.000279078	0.00859332	0.000164265	0.000158038	0.000212003	0.00038142	1.36e-08	0.000259638	2.15e-08	3.74e-06	1.1e-08	0.000517779	0.00010513	0.000310474	0.00325465	0.000261983	0.000143168	7.85e-06	1.23e-08	4.63e-05	0.00259817	0.000343603	0.000267483	0.000719918	0.00017432	0.000397654	3.15e-05	5.6e-05	7.84e-05	1.26e-08	1.24e-08
6-deoxyglucitol	0.0010912	0.00142009	0.0026168	0.00255567	0.00070448	0.00107336	0.00498832	0.00395723	0.00364601	0.00323624	0.00347311	0.00104641	0.000928774	0.00120098	0.00261587	0.00267753	0.00139249	0.0102163	0.000712354	0.00273901	1.03e-08	0.002266	1.55e-08	0.00202099	0.00144523	0.000464374	0.000689713	0.00150627	0.00648492	2.07e-08	0.000956792	0.00121293	0.00324063	0.0020437	0.00325442	0.000909014	0.00185703	0.00104967	0.00138163	0.00204546
3-(4-hydroxyphenyl)propionic acid	0.00225336	9.36e-05	0.000819775	0.00114009	0.000761119	2.42e-05	5.68e-05	1.13e-08	0.00209898	4.13e-05	0.0016257	3.53e-05	0.00275628	0.00230758	0.00286121	0.00182747	0.00019419	0.0004406	3.22e-05	2.61e-05	0.000608768	0.0001474	0.00320944	0.000251444	0.00221793	1.93e-05	3.71e-06	1.23e-08	5.83e-05	0.00251317	5.51e-05	8.78e-05	2.36e-05	4.49e-05	0.000149264	0.0021565	3.97e-05	2e-05	1.26e-08	2.73e-05
4-methylbenzenesulfonamide	0.0142637	0.0182881	0.0101941	0.0147495	0.0174421	0.0121149	0.0113343	0.0163291	0.0101809	0.0176984	0.0170102	0.0110331	0.0146961	0.013135	0.0144453	0.0150698	0.0204291	0.0245469	0.0123699	0.0141061	0.0141332	0.0141619	0.0114975	0.0125917	0.0183325	0.00994807	0.00996227	0.0116023	0.0136715	0.011951	0.0112826	0.00882985	0.0141581	0.013029	0.0138375	0.0125028	0.00823087	0.00806594	0.0161139	0.0158029
3-phosphoglycerate	0.000270471	0.000251559	8.79e-05	0.000313917	7.2e-05	0.000426283	4.76e-05	0.000113695	0.000174368	0.000233399	8.02e-05	0.000578419	0.000118957	0.00055782	0.000286092	9.07e-05	0.00036001	0.000345382	0.000376048	0.000321834	0.00061781	1.07e-08	0.000281468	0.000271815	0.000235398	0.000432701	0.000306153	0.000199349	0.000329193	0.000142959	0.000382711	0.000159554	0.000463818	8.99e-09	0.000616238	0.000165417	0.000434352	0.000528604	0.000301042	0.000169977
methylhexose	0.000258823	8.52e-05	4.51e-05	3.81e-05	4.1e-05	6.46e-05	7.76e-05	6.12e-05	0.000214374	0.000117102	7.55e-05	9.62e-05	3.32e-05	5.56e-05	0.000251484	3.65e-05	5e-05	1.98e-05	0.000227998	8.31e-05	1.03e-08	0.000148518	6.24e-05	7.93e-05	0.000121196	0.00019106	0.000250515	1.23e-08	0.000145772	0.000131937	0.000233046	0.000189928	0.000234776	8.99e-09	9.69e-09	0.000210783	1.27e-08	0.000123413	0.000202488	0.000211951
isocitric acid	0.000387121	0.00026611	0.000140901	0.000238123	0.000140863	0.000400951	7.8e-05	0.000228568	0.000340489	0.000534528	0.000252561	0.000264412	0.00013107	0.000290541	0.000708625	6.72e-05	0.000234687	0.000130831	0.000475211	0.000132195	1.03e-08	0.000991319	0.000432346	0.000324007	0.000305571	0.000441031	0.000304177	0.000389221	0.000707556	0.000149429	0.000583367	0.000238039	0.000945014	8.99e-09	0.00115364	0.000469365	0.000782437	0.000397924	0.000358873	0.000320895
hypoxanthine	0.00169605	0.000706953	0.000157911	0.00062833	0.000249103	0.000809447	6.49e-05	0.000121376	0.00125532	0.000653034	0.000224253	0.000652263	0.000132961	0.00106692	0.000290253	0.000190319	0.00046555	0.000372941	0.000736291	0.000142577	0.000983635	0.00190056	0.000151312	0.00100109	0.000929414	0.000804595	0.000705851	0.000798855	0.000761321	0.000243695	0.00143724	0.000523295	1.02e-08	8.99e-09	9.69e-09	8.55e-05	1.27e-08	0.000974661	0.000641821	0.000674245
dehydroascorbic acid	1.01e-08	4.36e-05	9.21e-05	0.000190321	0.000416092	0.000155708	1.06e-05	1.13e-08	0.000131733	0.000120285	8.69e-06	1.99e-05	0.000430191	0.00014426	0.000445066	6.86e-05	7.44e-06	0.000313581	4.08e-05	0.000307614	0.000305516	0.00016756	7.74e-05	0.000147717	7.97e-05	9.95e-06	0.000167714	0.000298986	6.9e-05	2.36e-05	0.000189419	6.04e-05	2.75e-05	0.000161528	0.000193346	9.89e-05	0.000237648	6.8e-05	0.000236422	0.000105814
gluconic acid lactone	0.000692026	0.000195035	7.94e-05	0.00014357	0.000653807	0.000152832	0.000139067	4.15e-05	1.33e-08	0.00048172	8.64e-05	0.000190022	0.000143141	0.000260819	0.000185146	0.000469773	7.27e-05	0.000182794	0.000106176	0.000626433	0.000267782	0.000366001	0.000503004	0.000245958	0.000121492	8.27e-05	0.000164424	1.23e-08	0.000286112	0.000227115	0.000283365	0.000142204	0.000768804	0.000639245	0.000332622	4.34e-05	0.000844709	6.17e-05	0.000446596	0.000439602
4-hydroxymandelic acid	9.63e-06	3.06e-05	0.000112634	0.000396314	0.000122377	7.72e-06	0.000360961	1.13e-08	1.33e-08	3.18e-06	0.000854373	4.96e-06	1.73e-05	1.07e-05	0.000629168	0.000116744	0.000676443	0.000882758	5.65e-06	0.000143553	5.01e-06	9.12e-06	0.00075208	0.000144954	1.95e-05	0.000176066	5.35e-06	0.000700365	1.25e-08	4.47e-05	4.52e-06	5.46e-06	1.5e-06	5.54e-06	7.25e-06	2.82e-05	6.99e-06	4.59e-06	0.000142939	1.24e-08
myristic acid	0.0022303	0.00174405	0.00603476	0.00217952	0.000980515	0.00837986	0.00852505	0.00151188	0.00300654	0.00277257	0.00214101	0.00265261	0.00184753	0.00829237	0.00117848	0.00248774	0.00198923	0.00139828	0.00434757	0.00978558	0.00301945	0.00242786	0.00107313	0.00461037	0.00212359	0.00421414	0.00684821	0.004796	0.00142164	0.00263359	0.00695971	0.00367603	0.00209609	0.00457192	0.00654289	0.0013909	0.00200048	0.00324147	0.000790047	0.00143793
alanine-alanine	1.01e-08	0.000963659	0.00192387	0.000744487	0.00213061	0.00162332	8.31e-05	0.000705115	0.00550632	1.15e-08	0.00201139	0.000629495	0.0136315	0.00221379	0.0010868	1.36e-08	0.00203545	0.000281126	0.00012762	0.00491222	1.03e-08	0.00297941	0.000579063	0.00202186	0.00122856	0.00747122	0.000332507	1.23e-08	0.000276021	0.00537508	0.000377546	0.00493811	0.00109275	0.000819167	0.000363827	0.00129349	0.00422109	0.00154111	0.000473601	0.000599239
fructose 2	1.92e-05	0.00151818	4.55e-05	0.000711836	4.04e-05	0.00165426	0.00142091	1.13e-08	0.000450802	0.00320839	5.67e-05	0.00246119	7.42e-06	0.00255622	6.53e-05	3.86e-05	0.00125472	0.000463554	0.00106621	0.00201052	2.56e-05	0.00205863	7.01e-05	0.00313988	0.000656112	0.00483366	1.17e-08	2.99e-05	0.00108945	0.000660741	9.03e-09	0.00074539	0.0016348	8.99e-09	9.69e-09	1.17e-05	0.00283796	1.21e-08	1.01e-05	0.00130432
altrose	0.000544361	0.00157545	0.000607506	0.000711431	6.87e-05	0.000174918	0.000695337	0.000139352	0.00192454	0.000107562	0.000145123	0.000688356	0.000143992	3.57e-05	0.000191771	8.54e-05	0.000113864	0.000549239	0.000850314	0.00022782	1.03e-08	1.07e-08	0.000228177	0.000553871	0.0033999	0.000129865	0.000342171	0.00150433	0.000887386	0.00313647	0.000164338	0.000280704	0.000772969	0.00133844	0.00102306	1.74e-05	0.00187185	0.0001257	0.000120412	0.000456108
adenine	4.38e-05	0.000153869	0.000128163	0.00027923	2.37e-05	5.54e-05	2.39e-05	4.94e-05	8.1e-05	4.84e-05	5.44e-05	6.24e-05	1.79e-05	5.35e-05	8.4e-05	2.54e-05	3.6e-05	3.32e-05	0.000252178	6.31e-05	6.99e-05	0.000129084	3.14e-05	8.49e-05	0.000166768	6.13e-05	3.35e-05	9.79e-05	3.06e-05	4.63e-05	2.1e-05	5.14e-05	6.36e-05	0.000207463	9.69e-09	2.91e-05	0.000192408	2.94e-05	2.02e-05	5.29e-05
glucose 2	0.00463248	0.00526225	0.00313651	0.00369496	0.00235348	0.00168975	0.00461785	1.13e-08	0.00469603	0.00698163	0.00222398	0.000819876	0.00203488	0.000890204	0.00394866	0.00271519	0.000835567	0.00891979	0.00117073	0.00684468	1.03e-08	0.0040746	0.00357037	0.00588319	0.00211474	0.00372032	0.00293419	0.00696542	0.00624608	0.00622143	0.000382508	0.00325704	1.02e-08	0.0035298	0.00785953	0.001059	0.00834352	0.0025407	0.0075699	0.00562628
1-methylgalactose	0.00183707	0.0044962	0.000233179	0.00165873	1.14e-05	0.000427368	0.000741862	5.29e-05	0.00312251	4.38e-05	1.34e-05	0.00115809	0.00843682	2.28e-06	0.000726317	5.39e-06	3.41e-05	8.89e-05	0.000202895	0.000230676	1.03e-08	0.00397174	0.000479175	0.00131177	0.00193617	0.00050686	0.000566491	0.00103577	0.00235279	0.00423238	0.00163418	0.000584228	0.000546422	0.00133611	0.00383388	5.78e-06	0.00343912	4.51e-06	0.00043255	0.000936995
histidine	0.00220633	0.00270125	0.00151256	0.00175326	0.00118749	0.000871754	0.00175704	1.13e-08	0.00233837	0.00291247	0.00115265	0.000474279	0.000929037	0.000460908	0.00187451	0.00121904	0.00153501	0.00458405	0.000717083	0.00279868	1.03e-08	0.00198969	0.00189905	0.0024735	0.00104533	0.00206038	0.00145253	0.00350928	0.00248414	0.00287308	9.03e-09	0.00165257	1.02e-08	0.00221729	9.69e-09	0.000580252	0.0050516	0.00121483	0.00377226	0.00234727
ascorbic acid	3.97e-05	1.47e-05	1.83e-05	8.47e-06	4.94e-06	4.39e-05	6.73e-06	5.39e-06	1.14e-05	1.62e-05	5.32e-06	8.6e-06	7.38e-06	5.97e-06	5.09e-05	7.92e-06	2.63e-05	4.68e-05	6.56e-06	5.03e-06	3.06e-05	2.81e-05	1.38e-05	4.74e-05	1.28e-05	0.000162049	3.64e-05	4.6e-06	6.2e-05	0.000113345	5.84e-05	3.05e-06	4.89e-06	1.32e-05	6.53e-06	1.14e-05	9.08e-06	4.02e-05	1.12e-05	4.63e-06
lysine	1.01e-08	0.00109409	0.00180647	0.00249239	0.00155689	0.00442367	0.00263317	0.000519681	1.33e-08	0.00789699	0.00130662	0.00134953	0.00169	0.00288873	1.09e-08	0.00586716	0.00113675	0.00283943	0.0032378	0.00229093	0.00237588	0.00354343	0.0015755	0.00285651	0.0059473	0.00630512	0.00743633	1.23e-08	0.00295152	0.00533949	0.00348769	0.0022782	0.00411137	8.99e-09	0.00569701	0.00414346	0.00631462	0.00240874	0.00593246	0.00403681
pentadecanoic acid	0.00875918	0.00152974	0.00434947	0.0153279	0.00525163	0.0100298	0.0115914	0.0014377	0.00804956	0.00588553	0.00796633	0.0123482	0.0192521	0.0163812	0.00992701	0.00560108	0.0135945	0.0118312	0.0301983	0.00269066	0.00743247	0.00550307	0.00204756	0.00785292	0.0147327	0.0152513	0.0226605	0.00441093	0.0114573	0.0175132	9.03e-09	0.00662572	0.00697739	0.0199733	0.0206008	0.00662013	0.0125233	0.0181846	0.000790047	0.00307982
isohexonic acid	0.0170382	0.0413639	0.017999	0.0278007	0.0126518	0.000205107	0.0271816	0.000531631	0.00146955	0.00371274	0.0192993	0.00530619	0.0330138	0.00488876	0.0168037	0.000632177	0.00162685	0.0286169	0.00140811	0.00807025	0.0166382	0.0216188	0.0164377	0.0204523	0.00092197	0.0120739	0.000387442	0.000580025	0.000956232	0.0323009	0.0183777	0.0139392	0.000557293	0.00054496	0.00516322	0.0159242	0.0095532	0.0126781	0.0147341	0.0137743
tyrosine	1.01e-08	0.00382976	0.00597928	0.00589314	0.00246791	0.00310519	0.00438916	0.00262033	1.33e-08	0.00763702	0.00552573	0.00319452	0.00866467	0.00430189	1.09e-08	0.00334993	0.00364198	0.00220958	0.00520124	0.005601	0.0135561	0.00771359	0.00733029	0.00949149	0.00885436	0.00727883	0.0155816	1.23e-08	0.00657714	0.0122742	0.0105442	0.00730815	0.00718451	0.0124224	9.69e-09	0.0202664	0.0147789	0.00579579	0.0120449	0.00679653
3,4-dihydroxyhydrocinnamic acid	0.00321692	0.000228754	0.00526357	1.65e-08	0.000715887	0.000195212	1.65e-08	1.13e-08	0.00231373	0.000591802	0.00522837	0.000192048	0.000629675	0.000279771	0.000290742	1.36e-08	0.00113337	2.15e-08	0.000360833	0.000428286	0.00118558	0.000627479	1.55e-08	0.00168264	0.000565253	0.000521937	0.00123711	0.00310355	1.25e-08	0.000663499	0.000957487	0.000507788	0.000580557	0.00104742	0.00192186	0.00148093	0.00114127	0.000386289	0.000962738	0.00051416
1-hexadecanol	1.01e-08	0.00325495	0.000543118	0.00271048	0.000288836	0.00338	0.00327893	0.000514795	0.0012517	0.00483017	0.000453721	0.00535953	0.0010464	0.00814446	0.00166017	0.000378858	0.00224525	0.00161269	0.00392718	0.00287407	0.00131981	0.00477875	0.000647047	0.00777682	0.00201259	0.00913007	0.00860268	0.000957328	0.00374654	0.00272169	9.03e-09	0.00175667	0.00311251	8.99e-09	9.69e-09	0.000185142	0.00461274	0.00941891	0.000647404	0.00238444
2,6-diaminopimelic acid	0.000631898	0.00024007	0.000185116	0.000364358	0.000269078	0.000320805	0.000224223	0.000545849	0.000307606	0.000232904	0.000257934	0.000306516	0.000153773	0.000361085	0.000144463	0.000217642	0.000347567	0.000279204	0.000344202	0.000257674	0.000637734	0.000276554	0.000348422	0.00031425	0.000208394	0.000286252	0.000259323	0.000496851	0.000502067	0.000431231	4.03e-05	0.000359556	0.000317613	0.000410915	0.000404055	0.000280077	0.000251223	0.00021999	0.000169111	0.000183403
galactonic acid	2.37e-05	0.0018252	0.000321765	0.000372119	0.000250682	1.66e-05	0.00035952	0.00142878	0.00132315	0.0012484	0.000501399	3.18e-05	0.000116719	0.000149739	0.00080175	0.0006392	0.000291176	0.00128679	8.24e-06	0.000252055	6.88e-06	6.54e-05	0.000256539	0.000559703	0.0006624	1.14e-05	0.000693231	1.23e-08	0.000983951	0.000354303	3.77e-05	0.000180734	0.000245555	9.11e-06	3.12e-06	2.9e-06	1.06e-05	0.000220524	0.000256132	0.000886593
gluconic acid	1.6e-05	6.51e-05	4.65e-06	2.26e-05	9.02e-06	1.05e-05	7.92e-06	9.85e-06	3.06e-05	6.82e-06	5.62e-07	2.56e-05	7.71e-06	1.76e-05	1.83e-05	3.51e-06	2.23e-06	1.66e-05	1.39e-08	7.46e-06	1.88e-05	2.39e-05	5.87e-06	1.62e-05	1.3e-05	0.000122512	4.31e-05	4.29e-05	9.21e-06	0.000193478	1.22e-05	2e-05	5.72e-06	8.99e-09	6.3e-05	1.97e-05	3.21e-05	1.38e-06	5.04e-06	4.58e-06
saccharic acid	0.00116086	0.00184579	0.000865157	0.00170308	9.25e-06	5.01e-05	0.00137146	0.000382121	0.000300816	0.000800796	0.000859149	9.23e-05	0.0009399	0.000313165	0.00100394	0.0007239	0.000370727	0.000838106	0.000350938	0.0008371	0.000993457	1.07e-08	0.000373258	0.000223162	0.000752727	7.27e-05	6.94e-05	0.000317425	1.25e-08	0.00165082	0.000539153	0.000201934	0.00118987	0.000500811	0.000422825	9.53e-05	0.00042287	8.32e-06	0.000552754	0.000324274
beta-hydroxymyristic acid	1.01e-08	0.0004916	7.75e-05	1.65e-08	3.95e-06	0.000147753	0.000208523	8.22e-05	0.000126694	0.000193826	1.34e-05	4.99e-05	2.1e-08	9.85e-05	0.000491868	1.36e-08	0.000187756	0.000266042	0.000350938	8.85e-05	1.03e-08	0.000564947	4.24e-05	0.000205661	5.66e-05	0.000283437	0.000189076	9.15e-05	1.25e-08	1.19e-05	0.000290562	0.00010727	0.000149988	0.000559007	0.000443799	0.000235899	0.000337279	5.98e-05	0.000134451	4.53e-05
palmitic acid	0.056057	0.0550099	0.0656344	0.054302	0.067356	1.27e-05	0.0950695	0.0817536	0.0708937	0.0675036	0.0612601	0.0766766	0.0523791	0.00467037	0.0436051	0.0835757	0.0744696	0.0844711	0.0064386	0.0573824	0.000854198	0.0643951	0.0722128	0.000416542	0.0951751	0.0763413	0.00269381	0.000320019	0.0722856	0.0813953	0.00264811	0.0825554	0.0606636	0.00110668	0.00271855	0.0639252	0.0549877	0.000386168	0.0666718	0.0663023
cis-sinapinic acid	1.01e-08	0.00133448	0.000739172	0.000755757	0.000738727	0.00139266	0.000190838	0.00099209	0.00106109	0.000917634	0.000524755	0.00115981	0.000740532	0.00124577	0.000930739	0.000934967	0.000850937	0.00101573	0.00154616	0.000743059	0.00190449	0.00130401	0.000769717	0.00148831	0.000939219	0.00267966	0.00181095	0.000861432	0.000430611	0.000414039	0.00268583	0.00102477	0.00158787	8.99e-09	9.69e-09	0.000664218	1.27e-08	0.00259604	0.000466843	0.000630581
ferulic acid	8.89e-06	2.06e-05	2.46e-06	4.76e-06	1.97e-05	1.04e-05	1.04e-05	3.43e-05	0.000188307	8.47e-06	1.36e-05	1.3e-05	3.98e-06	1.57e-05	7.54e-06	2.91e-06	6.48e-06	8.9e-06	1.39e-08	2.3e-06	4.53e-05	5.08e-05	4.14e-05	3.51e-06	5.8e-05	1.87e-05	5.58e-05	1.23e-08	2.45e-05	0.000464205	2.64e-05	3.06e-05	5e-06	0.000108345	0.000139993	1.17e-05	7.15e-06	9.79e-06	7.53e-06	7.74e-06
linoleic acid methyl ester	3.57e-06	1.5e-05	2.97e-06	2.87e-06	1.97e-05	1.04e-05	4.8e-06	3.43e-05	0.000188307	8.47e-06	1.36e-05	1.3e-05	3.98e-06	1.57e-05	5.45e-06	2.91e-06	7.73e-06	8.9e-06	1.39e-08	2.3e-06	4.53e-05	5.08e-05	4.14e-05	3.51e-06	5.8e-05	1.87e-05	5.58e-05	1.23e-08	1.92e-05	0.000464205	2.64e-05	3.06e-05	4.45e-06	0.000108345	0.000139993	1.01e-05	7.15e-06	9.79e-06	7.53e-06	7.74e-06
hexaric acid	0.000726847	0.000805822	0.000319319	0.00283564	0.000135204	0.000620073	0.000331906	5.84e-05	0.000914164	0.000214041	0.000123927	1.57e-05	0.00030326	0.000190451	0.000211688	0.000129838	0.00096396	0.000345661	0.000656419	0.00064694	0.000544058	0.00155736	1.55e-08	0.000343966	0.000518894	0.000445084	0.00122907	0.000365863	0.00100027	0.000402332	9.03e-09	0.00041422	0.000336514	0.000641291	0.00105547	0.000256952	0.000509206	0.000328444	5.44e-05	0.000352958
n-acetyl-d-hexosamine 1	0.000726847	0.000805822	0.000319319	0.00283564	0.000135204	0.000597101	0.000463645	0.000454189	0.000914164	0.000353977	0.000123927	9.96e-05	0.00030326	0.00027376	0.000211688	0.000129838	0.00096396	0.0015576	0.000656419	0.000472552	0.000549969	0.00155736	1.55e-08	0.000343966	0.000518894	0.000445084	0.00122907	0.000365863	0.00100027	0.000402332	9.03e-09	0.000266425	0.000336514	0.000641291	0.00105547	0.000136179	0.000509206	0.000328444	0.000631053	0.000352958
glutamyl-valine	1.01e-08	1.05e-05	6.46e-06	2.07e-05	7.22e-06	1.08e-05	3.66e-06	5.37e-06	2.11e-05	2.99e-06	5.02e-06	1.93e-05	1.19e-05	5.91e-06	1.09e-08	9.73e-06	2.39e-05	1.26e-05	1.07e-05	2.99e-06	1.03e-08	2.48e-05	1.74e-05	6.03e-05	3.36e-05	2.02e-05	1.11e-05	1.55e-05	4.83e-05	6.5e-06	2.16e-05	2.36e-05	1.02e-08	8.99e-09	9.69e-09	0.000107825	1.27e-08	8.29e-06	1.61e-05	1.57e-05
heptadecanoic acid	0.0011869	0.000678914	0.00136582	0.000717181	0.000359267	0.00535759	0.00368728	0.000767909	0.0013786	0.00137241	0.000519785	0.00215592	0.000279717	0.00388443	0.000619715	0.000609139	0.000862386	0.000790437	0.0125198	0.000794068	0.00384701	0.00186944	0.00108002	0.0051746	0.000531624	0.0116034	0.0147606	0.00329886	0.0008565	0.000740853	0.0167618	0.00199245	0.000891236	0.0160132	0.00650823	0.000543073	0.00292705	0.00321879	0.00032698	0.000518998
octadecanol	0.000162999	0.00013509	9.45e-06	0.000144671	2.98e-05	0.000351279	0.000234252	2.49e-05	0.000124438	0.000426299	1.03e-05	0.000556606	1.62e-05	0.00117768	4.18e-05	3.39e-05	0.00010649	0.000127288	1.39e-08	0.000236136	0.000190092	0.000779861	3.6e-05	0.0010657	0.000112791	0.0017836	1.17e-08	0.000173409	0.000118334	0.000113179	9.03e-09	0.000389481	0.000255046	8.99e-09	9.69e-09	3.39e-05	0.000707895	0.00165257	2.27e-05	0.000138877
beta-mannosylglycerate	1.01e-08	0.00225526	5.73e-06	1.65e-08	5.06e-06	0.000300026	0.00137146	5.1e-06	0.000820141	0.000448091	2.97e-05	9.23e-05	0.000160119	0.000117398	7.8e-06	5.85e-05	2.2e-05	0.00119506	1.04e-05	1.73e-05	0.000335055	1.07e-08	0.000124329	3.31e-05	1.18e-05	0.00108058	0.000162377	0.000334747	0.000612114	0.000652788	9.03e-09	0.000310097	1.02e-08	8.99e-09	0.00031927	8.08e-06	0.000160426	3.32e-05	0.000103834	1.92e-05
phytol	0.000381398	0.000616279	3.47e-05	7.52e-05	4.75e-05	0.000273061	0.000413637	7.03e-05	0.000206653	0.000108914	0.000117851	0.000411324	4.45e-05	0.000544588	0.000436364	5.03e-05	0.000559215	5.49e-05	0.000628059	0.000656989	1.03e-08	0.00145748	0.00108431	0.000555996	0.000558076	0.00120181	1.17e-08	1.23e-08	0.000285781	0.000210089	9.03e-09	1.27e-08	1.02e-08	0.000911954	0.00112926	0.000481405	0.00079677	0.00173215	0.000306227	0.000620732
5-hydroxy-3-indoleacetic acid	7.61e-05	5.78e-05	2.67e-05	5.68e-06	6.06e-05	6.95e-05	1.56e-05	0.000171353	0.000266269	7.99e-05	1.53e-05	3.7e-05	1.3e-05	0.000268436	3.63e-05	1.65e-05	3.47e-05	0.000202881	3.48e-06	1.1e-08	0.000117574	6.06e-05	0.000462421	5.42e-05	0.000195234	6.68e-05	3.19e-05	1.23e-08	0.000117404	4.55e-05	8.45e-05	0.00012726	7.04e-05	1.08e-05	9.69e-09	4.94e-06	8.66e-06	7.24e-05	3.02e-05	0.000359206
3-hydroxypalmitic acid	0.000169587	0.000908229	1.22e-05	0.000538196	5.53e-05	0.00159239	0.000323615	0.000306935	0.000688867	0.0019366	8.13e-05	0.0022921	0.000175961	0.00307682	8.89e-05	0.000360894	0.000368476	0.000397549	0.00135604	0.00150444	0.000300127	0.00165576	0.000549158	0.00158105	0.000640018	0.00244485	0.00140152	0.000297238	0.00154035	0.000582755	9.03e-09	7.71e-05	0.00137612	0.00210527	9.69e-09	0.000122881	0.00134783	0.00319096	4.71e-05	0.0012301
oleic acid	0.0219939	0.00717024	0.00590497	0.0043549	0.0238134	0.0274377	0.0191671	0.0239854	0.0109721	0.00548189	0.00494942	0.0168351	0.00348721	0.0334247	0.0125307	0.00325171	0.00388695	0.00393364	0.0531861	0.0148468	0.0403668	0.0124234	0.0244471	0.014909	0.00939217	0.0176884	0.0230943	0.0411385	0.0154449	0.00239195	0.0297463	0.0467395	0.0101237	0.0299054	0.0350178	0.0221303	0.0089088	0.029054	0.00856662	0.00789245
isolinoleic acid	1.01e-08	2.1e-05	3.71e-06	0.000279123	9.52e-06	0.000170808	6.58e-05	0.000466337	5.58e-05	4.12e-05	2.05e-05	3.91e-05	1.05e-05	1.3e-08	3.22e-05	7.41e-06	1.86e-05	5.37e-05	0.00274988	2.87e-05	0.000545711	5.75e-05	4.13e-05	1.33e-08	2.47e-05	0.000294933	6.33e-05	0.000744412	5.16e-05	4.33e-06	0.000718345	0.00199129	2.25e-05	0.000650715	0.00162553	1.42e-05	4.33e-05	0.000336257	3.87e-05	0.000712275
nonadecanoic acid	6.03e-05	3.44e-05	5.24e-05	1.66e-05	4.42e-06	2.11e-08	1.15e-05	5.89e-05	0.000159138	8.08e-05	1.53e-05	1.44e-08	1.55e-05	0.0002165	7.72e-06	3.96e-06	6.73e-06	7.63e-06	1.39e-08	1.78e-05	0.000338067	0.000141751	1.48e-05	0.000463089	2.12e-05	0.000974662	0.000513133	1.23e-08	2.19e-06	1.21e-05	0.00070187	0.000976647	2.65e-05	0.00108607	0.00108932	2.94e-05	4.78e-05	1.21e-08	2.18e-05	1.84e-06
pseudo uridine	0.000156596	0.00019643	1.89e-05	2.67e-05	9e-06	0.000219026	4.94e-05	0.000353329	6.09e-05	9.07e-05	2.04e-05	0.00017356	1.07e-05	0.000133692	9.24e-06	1.74e-05	2.83e-05	8.73e-05	1.39e-08	4.4e-05	0.000425869	0.000303614	1.3e-05	5.29e-05	7.03e-05	0.000482674	1.17e-08	0.000587545	3.38e-05	2.32e-05	9.03e-09	0.000262892	0.000228783	8.99e-09	9.69e-09	1.52e-05	0.000547603	0.000474956	3.71e-05	1.67e-05
cis-gondoic acid	0.00029977	1.17e-05	9.75e-05	2.96e-05	0.000159048	0.00039995	3.96e-05	0.000423362	7.07e-05	0.000105979	8.68e-05	3.85e-05	1.41e-05	0.000207622	0.000109485	3.84e-05	3.24e-05	6.28e-05	0.00103313	0.000132897	1.03e-08	0.000100481	0.000766478	0.000178296	1.78e-05	0.000215559	0.000175337	0.000559943	0.000106625	4.56e-05	0.000431585	1.27e-08	5.43e-05	0.00046417	0.000643658	0.000191384	0.000137055	0.000166779	8.11e-05	5.56e-05
arachidic acid	0.00161016	0.000606976	0.000838167	0.000796467	0.00117332	0.00783312	0.00172597	0.00179173	0.000919916	0.00199327	0.000541297	0.00473718	0.000270766	0.00429597	0.000776442	0.000584132	0.00170131	0.000445571	0.0135066	0.00141269	0.0075801	0.00216763	0.00216452	0.00500567	0.000913657	0.00993214	0.00583849	0.00554487	0.00173998	0.000529489	0.00974058	0.0182598	0.00129534	0.01863	9.69e-09	0.00202785	0.00296637	0.00707296	0.000551743	0.000965114
galactose-6-phosphate 2	0.000143943	0.000151395	3.86e-05	3.33e-06	5.87e-06	0.000164359	8.93e-05	0.000131268	0.000119592	0.000101773	1.08e-05	2.9e-05	5.91e-06	0.000260793	0.000240525	6.29e-06	1.55e-05	0.000144508	1.39e-08	6.41e-05	0.000108986	0.000199231	6.03e-05	3.16e-05	5.73e-06	0.00013907	5.62e-05	0.000316443	0.000102723	1.01e-05	9.03e-09	0.000160567	9.73e-05	0.000137971	0.000186416	3.12e-05	2.5e-05	5.93e-05	8.91e-06	2.82e-05
homocystine	0.000120392	1.12e-05	4.43e-05	5.37e-05	0.000274232	2.55e-05	0.000236203	8.47e-05	6.43e-05	0.000174284	0.00011318	8.7e-05	6.3e-06	3.32e-05	9.63e-05	6.15e-05	0.000180393	4.47e-05	6.88e-05	0.000192791	0.000245652	0.000123699	4.11e-05	0.000170246	3.88e-05	0.000172422	0.000105214	5.74e-05	0.000147958	9.37e-05	0.000278195	0.000198033	8.02e-05	0.000163875	0.00015333	7.36e-05	5.94e-05	5.18e-05	9.62e-05	0.000140696
arbutin	0.000544004	4.33e-06	1.3e-08	9.93e-05	0.000161241	3.11e-06	3.29e-06	0.000264792	1.33e-08	0.000259893	1.75e-05	6.96e-06	1.75e-05	0.000689231	0.000196486	3.56e-05	1.1e-05	1.88e-05	4.09e-05	0.000342237	0.00043674	1.02e-05	2.36e-06	7.7e-06	6.58e-06	7.26e-05	0.000198828	1.23e-08	0.000165668	0.000608128	0.000484721	1.27e-08	1.91e-06	2.77e-05	0.000442123	6.61e-06	3.58e-06	0.000373399	1.47e-05	5.81e-06
nicotianamine	1.62e-05	7.2e-06	1.14e-06	7.34e-06	3.95e-06	3.02e-05	6.33e-06	4.94e-06	6.92e-06	8.28e-06	7.59e-06	1.06e-05	6.83e-06	7.57e-06	5.48e-06	5.22e-06	1.1e-05	3.26e-06	9.43e-06	9.01e-06	1.03e-08	9.01e-06	1.82e-05	1.07e-05	9.06e-06	3.26e-05	1.17e-08	2.75e-05	3.78e-06	1.28e-05	9.03e-09	1.27e-08	2.23e-05	8.99e-09	1.98e-05	8.36e-06	1.69e-05	3.11e-05	2.14e-06	1.35e-05
inosine	1.01e-08	9.98e-05	8.39e-05	3.3e-05	2.88e-06	0.000500117	3.63e-05	1.71e-05	0.000213982	0.000595093	1.76e-05	0.000891156	8.52e-06	0.000898211	4.7e-05	1.21e-05	2.99e-05	4.96e-06	0.000329432	4.29e-06	1.03e-08	6.62e-05	1.78e-05	9.63e-05	0.000390847	1.28e-08	1.17e-08	0.000630997	7.74e-05	0.000147314	9.03e-09	0.000740945	0.000471018	8.99e-09	9.69e-09	1.13e-05	0.000681737	1.21e-08	3.86e-05	0.00013307
1-monopalmitin	0.000303285	0.00016924	0.000149869	0.000498388	0.000121233	0.000586016	0.000137626	0.000389042	7.34e-05	0.00032276	8.49e-05	6.59e-05	0.000132888	0.000195202	8.21e-05	0.000162765	0.000429958	0.000794227	5.84e-05	5.29e-05	0.000358751	1.07e-08	0.000214538	0.000233232	0.000120869	0.00054168	0.000817551	1.23e-08	0.000834919	0.000314174	0.00028369	0.000600419	0.000241726	0.000122157	0.00016296	6.5e-05	0.000148683	5.3e-05	0.000118751	5.4e-05
sucrose	0.000544004	0.000184064	0.000134985	0.000479654	0.00010416	0.000743042	0.000145423	0.000371004	0.000108668	6.32e-05	6.11e-05	7.18e-05	0.000155811	0.000200291	8.32e-05	0.000157229	0.000544489	0.000998493	5.72e-05	6.37e-05	0.000354906	1.07e-08	0.000217211	0.000157387	0.000124192	0.000642936	1.17e-08	1.23e-08	1.25e-08	0.000417502	0.000266136	0.000122189	0.000300948	0.000465896	0.000296784	7.13e-05	0.000149778	6.35e-05	0.000114039	5.51e-05
docosenoic acid	0.000174706	9.09e-06	3.51e-06	9.54e-06	1.24e-05	2.53e-05	8.55e-06	5.95e-05	4.89e-06	1.15e-08	1.51e-05	1.2e-05	1.71e-05	5.57e-05	9.43e-06	7.04e-06	1.8e-05	2.5e-05	0.000115697	0.000207472	1.03e-08	3.63e-05	9.53e-06	2.54e-05	2.17e-05	5.01e-05	7.83e-05	5.89e-05	4.12e-05	2.36e-05	9.05e-05	9.15e-05	2.57e-05	0.000130705	0.000107562	3.49e-05	0.000330087	3.56e-05	2.39e-05	4.2e-05
behenic acid	0.00125131	0.000359415	0.000375149	0.000450884	0.00105356	0.00461429	0.000615837	0.000501127	0.000550923	0.00180638	0.000348918	0.00342247	0.000180185	0.00321195	0.000904981	0.000258868	0.00112945	0.000279859	0.00604972	0.000929064	0.00740479	0.00226604	0.000881864	0.00281081	0.000605662	0.00432211	0.00303375	0.003403	0.00109018	0.000398185	0.00684143	0.00522835	0.00127423	8.99e-09	9.69e-09	0.00250087	0.0019193	0.0036843	0.000318239	0.000800211
digalacturonic acid 3	0.000979379	0.000447816	0.000313729	0.000287505	7.95e-05	0.00422668	0.000185025	0.00143336	0.000783856	1.15e-08	9.3e-05	0.000635672	3.14e-05	0.000314049	0.000124839	0.00022406	0.000866941	0.00045284	0.000869091	0.000262312	0.00158725	0.000710589	0.000176683	0.000388381	5.03e-05	0.000359767	0.000325452	0.00253611	0.00167739	0.00170147	0.00194185	0.001528	0.000810241	0.000231918	0.000124078	6.7e-05	0.000264773	0.00224661	0.000218182	1.24e-08
1-monoolein	0.000979379	0.000447816	0.000313729	0.000287505	0.000131815	0.00422668	0.000185025	0.00143336	0.000783856	1.15e-08	9.3e-05	0.000635672	1.6e-05	0.000314049	0.000124839	0.00022406	0.000866941	0.00045284	0.000869091	0.000262312	0.00158725	0.000710589	0.000176683	0.000388381	5.03e-05	0.000359767	0.000325452	1.23e-08	0.00167739	0.00170147	0.00194185	1.27e-08	0.000810241	0.000231918	0.000124078	6.7e-05	0.000264773	0.00224661	0.000740457	1.24e-08
1-monostearin	7.92e-05	2.88e-08	7.98e-05	0.000515276	0.00198345	0.000119513	0.000223211	1.13e-08	4.75e-05	0.000215762	4.28e-05	8.99e-06	0.000146503	0.000528976	0.000816489	5.56e-05	0.00035363	0.000582253	0.000940227	4.4e-05	0.00158725	1.07e-08	1.55e-08	0.000640973	6.29e-05	0.000130561	0.000228741	1.23e-08	0.000910741	0.000332009	0.000217118	0.001528	0.00012294	3e-06	0.000471554	0.000203866	0.000119858	0.000219468	0.000175609	8.63e-05
lactobionic acid 2	1.01e-08	2.88e-08	0.000249491	0.00126679	2.44e-05	5.23e-05	0.000594554	1.13e-08	6.98e-06	8.02e-05	4.58e-05	1.58e-05	0.000369226	0.000314978	0.000621831	4.34e-06	0.000905023	0.00145069	0.00064285	5.84e-05	1.03e-08	1.07e-08	0.0006784	0.00145349	1.62e-05	9.63e-05	0.000506178	0.00110912	0.001975	0.000972292	0.000298892	1.27e-08	0.000190961	0.000303402	0.000152802	0.000529228	5.22e-05	0.000204637	0.000406909	6.72e-05
lactitol	0.00033608	0.00172166	1.44e-05	0.00128655	0.000528034	0.000827898	0.000758518	0.000837222	0.000403926	0.000272529	2.28e-05	0.000288201	1.54e-05	0.000274195	0.00131403	6.15e-06	0.00204229	0.00173657	0.000247108	0.000916543	0.00101523	0.000431542	1.5e-05	0.00169454	5.49e-06	0.000871542	0.00039588	1.23e-08	1.25e-08	2.07e-08	0.000587431	0.000957562	0.000985779	0.000254283	0.000217126	6.08e-06	0.00067795	0.000142296	1.26e-08	0.00160195
lignoceric acid	1.01e-08	0.00669546	0.000181698	0.000390166	0.000440741	0.00184846	0.000939451	0.000513644	0.000259113	0.0013301	0.000205972	0.00227982	0.000113725	0.0020959	0.000599498	0.00101311	0.000722358	0.000369967	0.00218853	0.00067475	0.00343953	0.00499825	0.000502957	0.0018152	0.000413884	0.00221643	0.00199455	0.00123741	0.00136316	0.00037306	0.00460572	0.00318036	0.0013731	8.99e-09	9.69e-09	0.000643562	0.00153494	0.00226573	0.000229197	0.000578901
palatinitol	0.000769761	0.00107911	0.000311257	0.000383447	0.000334458	9.6e-06	0.000283486	0.000118099	0.000228972	3.06e-05	9.48e-05	3.21e-05	0.00025403	7.64e-06	1.09e-08	0.000147829	0.00108684	0.000720298	0.000352889	3.38e-05	1.03e-08	0.000787423	0.000264707	0.000667275	1.25e-05	0.000430843	0.000722458	0.000914981	1.25e-08	0.00122428	0.000184118	0.000515222	0.000110517	0.000487443	9.69e-09	0.000154821	0.000345387	8.63e-05	0.000629279	0.000139771
tocopherol delta-	0.000280167	7.7e-05	1.11e-05	4.8e-05	2e-05	0.000153517	4.76e-05	2.6e-05	2.89e-05	0.000115457	1.39e-05	0.000284803	1.92e-05	0.000162815	0.000143707	0.000100851	6.41e-05	3.06e-05	0.000441941	2.98e-05	1.03e-08	0.000276183	4.4e-05	0.000176709	5.2e-05	0.00026416	0.000313443	0.000182137	6.69e-05	5.75e-05	9.03e-09	0.000157116	0.0001418	0.000191384	9.69e-09	4.94e-05	0.000109617	0.000375401	3.91e-05	5.81e-05
myristyl myristate	0.000441863	1.88e-05	0.000104937	7.56e-06	5.49e-06	0.000192863	1.01e-05	5.16e-06	5.66e-06	0.000331339	2.63e-05	0.000660696	4.92e-06	1.22e-05	1.04e-05	2.43e-06	6.6e-06	4.48e-06	2.51e-06	2.28e-05	1.03e-08	0.000321102	8.31e-05	1.27e-05	1.5e-05	1.79e-05	0.000272054	0.00050423	3.8e-06	4.98e-06	0.000567696	0.000237184	8.46e-06	0.000728808	0.000829609	6.94e-06	0.000317332	0.000748254	1.15e-05	1.37e-05
chlorogenic acid 1	7.93e-06	3.55e-05	0.000138012	7.74e-05	2.9e-05	2.11e-08	1.52e-05	0.000229016	0.000398628	0.000652781	6.13e-05	0.000285313	0.000105278	0.00089294	8.91e-05	6.59e-05	7.3e-05	2.15e-08	0.000193361	0.000304122	0.000131044	0.000730378	0.00100529	0.000278955	0.000107239	0.000366948	0.000638994	0.000681565	0.000159086	2e-05	0.000588528	1.27e-08	0.000563515	0.000779901	0.000954778	2.33e-08	0.000605546	0.000442661	0.000165959	0.000505336
gamma-tocopherol	0.00214971	0.000402063	8.21e-05	0.000290376	0.000165723	0.000974829	0.000246544	0.000115701	0.000178935	0.00143613	8.55e-05	0.00213832	0.000168187	0.00148315	0.00135546	0.000797624	0.000388107	0.000115285	0.00288783	0.000711857	1.03e-08	0.00218316	0.000316487	0.00116923	0.000331236	0.00153529	0.00224701	0.00119668	0.000483808	0.00039102	0.00328527	0.00226889	0.00121658	0.00128106	0.00272663	0.000316244	0.000857285	0.00338773	0.000273778	0.000560898
cerotinic aci	0.000289531	1.03e-05	8.73e-06	7.68e-06	6.19e-06	1.44e-05	4.95e-06	7.11e-06	3.27e-06	0.000306774	6.6e-06	0.000510214	3.79e-06	0.000389253	1.57e-05	4.39e-06	1.71e-05	1.68e-05	0.000924367	2.58e-05	0.000271533	0.000532071	5.53e-06	0.000236413	7.7e-06	0.000289552	1.17e-08	2.73e-05	2.52e-05	1.12e-05	0.000500912	0.00040666	0.000314334	8.99e-09	9.69e-09	2.1e-06	0.000259841	0.000474028	1.91e-06	1.66e-05
tocopherol alpha-	0.00038694	1.83e-05	3.22e-05	7.41e-05	5.17e-05	0.000163379	1.27e-05	0.000144828	6.02e-05	0.000301106	2.3e-05	0.000337703	7.09e-05	0.000351388	0.000323648	0.000144284	0.000107102	7.31e-06	0.000490085	0.000874344	1.03e-08	0.000494912	8.09e-05	0.000328716	8.79e-05	0.000329319	0.000789069	0.000300035	9.32e-05	1.41e-05	9.03e-09	1.27e-08	0.000277302	0.000513621	0.000637494	0.000140825	0.000168738	0.00124428	0.000101503	0.000206741
d6 cholesterol	0.0113878	0.00170404	0.00778867	0.00180813	0.00746292	0.00291042	0.00114672	0.00959869	0.00168943	0.00547618	6.1e-05	0.007213	0.00950841	0.00572931	0.0114245	0.0124188	0.00188835	0.00088002	0.00520417	0.00447898	0.0118749	0.0106721	0.011297	0.00495272	0.0013648	0.00465659	0.0005579	0.0104768	0.00289829	0.00173342	0.0070024	0.00296879	0.00438376	0.00561615	0.00764278	0.0101759	0.00363288	0.00759473	0.000131186	0.0027798
cholesterol	0.0326861	0.00459242	0.0197605	0.0251767	0.0153434	4.65e-05	2.47e-05	0.0208875	0.0135786	0.0244353	5.67e-05	0.00160382	2.93e-05	0.00131192	0.0337147	0.0307722	0.0146906	5.16e-05	0.00118561	0.0260963	0.00157074	0.0210321	0.0315883	0.0268741	6.88e-05	0.00794625	0.000222138	0.0299437	0.0214402	3.25e-05	8.12e-05	0.0216693	0.0224123	4.76e-05	0.000162572	0.0239095	0.0135787	0.0140794	0.0199469	0.0211127
dihydrocholesterol	0.000245546	2.44e-05	3.05e-05	7.21e-05	2.18e-05	0.000138238	2.25e-05	1.71e-05	6.71e-05	0.000459985	3.14e-05	0.000701938	3.15e-05	0.000566016	0.000355656	2.22e-05	5.35e-05	3.08e-05	0.000283378	0.000194962	1.03e-08	0.000490769	5.85e-05	0.000205913	1.76e-05	0.000314491	0.000519636	9.92e-05	0.000201955	1.38e-05	0.000571985	0.000223095	0.000285342	0.000432241	0.000893841	5.34e-05	0.000208829	0.000815756	1.82e-05	7.46e-05
chenodeoxycholic acid	0.00946832	0.00109252	0.00144691	0.00390212	0.00247333	0.00150128	0.000748704	0.00155814	0.00476813	0.00436572	0.00118929	0.000176562	8.12e-05	0.00536096	0.000844946	0.000383925	0.00611472	0.000963955	0.000864022	0.000724876	0.00780885	0.00595868	0.00296981	0.0109192	0.00118997	0.00176199	0.00527523	0.0041705	0.00448604	0.000467233	0.00924466	0.014915	0.00354781	0.00956487	0.00434359	7.43e-05	0.00730451	0.00602611	0.000179853	0.00256983
beta-sitosterol	1.01e-08	0.00123053	0.00319097	0.00501618	0.00323245	0.00136958	0.000488921	0.00656842	0.00243002	0.00488208	0.0039269	0.000879297	0.0049018	0.000852631	1.09e-08	0.00574716	0.00387358	0.00416476	0.000696737	0.00737436	1.03e-08	0.00361843	0.000979877	0.00420047	0.00167579	0.000857065	0.000454304	1.23e-08	0.0069743	0.00208662	0.00121722	1.27e-08	0.00756798	0.000982988	0.00045924	0.00815848	0.00137821	0.00272418	0.00709764	0.00310448
melezitose	0.000833142	5.65e-05	2.07e-05	8.67e-05	0.000473729	8.19e-05	5.65e-05	0.00110395	2.99e-05	0.000545421	2.19e-05	0.000310093	5.82e-05	0.00073626	0.000992857	0.000260844	0.000195348	0.000391697	0.000277975	0.000489765	0.000714401	0.000475403	0.000143067	0.000278503	0.000130572	0.00013134	0.000243038	0.000186063	0.000400493	5.92e-05	9.03e-09	0.000110303	0.000559177	0.00055514	9.69e-09	7.71e-05	0.000188481	0.000288542	0.000421125	0.000371061
