# Supplementary material for: Effects of Hypoxemia by Acute High-Altitude Exposure on Human Intestinal Flora and Metabolism
Source: Microorganisms. 2023 Sep 11;11(9):2284. doi: 10.3390/microorganisms11092284 (PMC10535934; doi:10.3390/microorganisms11092284)
Supplement: Supplementary file 1 [file microorganisms-11-02284-s001.zip › SupplementaryTableS6.xlsx]

## Sheet: Table S5
Supplementary Table S6: Serum metabolite measurements in samples from the C and D groups
	C1	C2	C3	C4	C5	C6	C7	C8	C9	C10	C11	C12	C13	C14	C15	C16	C17	C18	C19	C20	D1	D2	D3	D4	D5	D6	D7	D8	D9	D10	D11	D12	D13	D14	D15	D16	D17	D18	D19	D20
Label	C	C	C	C	C	C	C	C	C	C	C	C	C	C	C	C	C	C	C	C	D	D	D	D	D	D	D	D	D	D	D	D	D	D	D	D	D	D	D	D
glycolic acid	0.0024352	0.0117368	0.0016798	0.00171843	0.0034946	0.00148601	0.00914697	0.00460042	0.00217293	0.00190844	0.00531041	0.00209943	0.00314174	0.00164773	0.00257495	0.0036534	3.01e-08	0.00261692	0.0049597	0.00119736	0.00142035	1.57e-08	0.00119042	0.00411637	0.00148402	0.00155336	1.51e-08	0.00140635	1.71e-08	0.000684403	0.00660944	0.00052967	0.00339821	1.13e-08	1.38e-08	0.00183038	0.000809458	0.000961598	0.004295	0.00133107
n-acetylglutamate	1.75e-05	4.3e-05	1.82e-05	2.4e-05	9.46e-05	3.69e-05	1.15e-05	2.35e-05	3.05e-05	0.000101079	1.85e-05	8.39e-06	4.63e-06	1.24e-05	1.47e-08	3.45e-05	2.77e-05	0.000120582	0.000269909	0.000515785	0.000132744	1.57e-08	3.08e-05	3.75e-05	4.06e-05	0.000328653	0.000125178	5.56e-05	0.000241738	7.15e-05	0.000325147	3.89e-06	0.000467642	0.000417023	1.38e-08	3.41e-05	0.000268639	0.000136851	0.000301832	0.000159737
5-aminovaleric acid	0.0323201	0.000662504	0.0910582	0.0791088	0.0988448	0.00240403	0.0112004	0.0909517	0.0418614	0.0030013	0.116954	0.00359621	0.120249	0.00211989	0.0487363	0.0998271	0.00572985	0.00440263	0.00327834	0.0321953	0.0160198	0.0297963	0.10684	0.0109379	0.0119797	0.00212148	0.00315402	0.0061267	0.0273153	0.0332133	0.00237211	0.00698978	0.00232169	0.00644281	0.00322209	0.0191959	0.00349526	0.00288991	0.0170546	0.00777809
alpha-aminoadipic acid	0.00034823	0.00093012	0.000162113	0.00163881	2.58e-05	6.32e-05	0.000282113	1.72e-08	0.000600321	0.000179333	8.87e-06	8.06e-06	2.71e-08	0.000272692	1.47e-08	0.000625053	7.35e-05	0.00100682	1.78e-05	1.59e-08	1.38e-08	3.6e-05	0.000115311	0.00044977	3.79e-05	1.84e-05	1.03e-05	1.65e-08	0.000371595	0.000119394	4.57e-05	5.84e-05	0.000234067	3.33e-05	0.000278914	3.76e-05	4.91e-05	5.81e-06	1.75e-08	1.85e-08
tyrosine	1.43e-08	0.00570776	0.00831047	0.00865791	0.00362839	0.00467323	0.0073107	0.00397613	1.85e-08	0.0102929	0.0073451	0.00494065	0.0111927	0.00552829	1.47e-08	0.00527267	0.00502244	0.00303456	0.00728701	0.00812301	0.0181334	0.0112515	0.0110918	0.0135689	0.0138069	0.0110476	0.0200635	1.65e-08	0.0090084	0.0180244	0.0135747	0.0111776	0.0100484	0.0155583	1.38e-08	0.028706	0.0210898	0.00794283	0.016701	0.0101451
nonadecanoic acid	8.55e-05	5.13e-05	7.29e-05	2.44e-05	6.51e-06	3.17e-08	1.92e-05	8.94e-05	0.000221449	0.000108866	2.03e-05	2.22e-08	2e-05	0.000278221	1.04e-05	6.23e-06	9.28e-06	1.05e-05	1.95e-08	2.58e-05	0.00045222	0.000206767	2.23e-05	0.000662026	3.3e-05	0.00147932	0.000660732	1.65e-08	2.99e-06	1.77e-05	0.000903591	0.00149375	3.71e-05	0.00136023	0.00155504	4.16e-05	6.82e-05	1.66e-08	3.03e-05	2.74e-06
chlorogenic acid 1	1.12e-05	5.28e-05	0.00019182	0.000113687	4.27e-05	3.17e-08	2.53e-05	0.000347513	0.000554711	0.000879799	8.14e-05	0.000441266	0.000135995	0.0011475	0.000120259	0.00010365	0.000100665	2.95e-08	0.000270901	0.000441061	0.000175292	0.00106537	0.00152115	0.00039879	0.000167221	0.000556945	0.000822796	0.000915145	0.000217892	2.94e-05	0.000757674	1.94e-08	0.000788141	0.000976773	0.00136298	3.3e-08	0.000864125	0.000606644	0.000230113	0.00075431
chenodeoxycholic acid	0.0134174	0.00162826	0.00201103	0.0057328	0.00363636	0.00225938	0.00124706	0.00236435	0.00663509	0.00588398	0.00158087	0.000273071	0.000104918	0.00688928	0.00114029	0.000604282	0.00843245	0.00132386	0.00121051	0.00105127	0.0104456	0.00869171	0.00449374	0.0156099	0.00185555	0.00267431	0.00679261	0.00559978	0.00614431	0.000686123	0.0119016	0.0228121	0.00496203	0.0119794	0.00620064	0.000105243	0.0104237	0.00825848	0.000249378	0.00383597
